# Supplementary material for: Alteration of mRNA 5-Methylcytosine Modification in Neurons After OGD/R and Potential Roles in Cell Stress Response and Apoptosis
Source: Front Genet. 2021 Feb 3;12:633681. doi: 10.3389/fgene.2021.633681 (PMC7887326; doi:10.3389/fgene.2021.633681)
Supplement: Supplementary file 4 [file Table_3.XLSX]

## Sheet: legend
Legend to Supplementary Table S3
All chromosome names and coordinates are aligned to reference genome (UCSC MM10)
SeqID	The Chromosome Id
refPos	Postion Of The Methylated C On The Reference Sequence
refStrand	Genomic Strand
cov	Coverage depth
C_count	C Count
methRate	Methylation Rate
transcript_id	The Transcript Id
GeneName	The Symbol Of The Methylated Gene
gene_region	The mRNA Region of the the m5C site within, including 'CDS', '5UTR' And '3UTR'
Overall m5C Level	Methylation site were recalculated as (methRate rep1 + methRate rep2 + methRate rep3)/3 to gain the overall m5C level, only sites with coverage depth ≥ 10 and methRate ≥ 0.1 were considered as credible m5C sites

## Sheet: control
						control 1			control 2			control 3			control
SeqID	refPos	refStrand	transcript_id	GeneName	gene_region	cov	C_count	methRate	cov	C_count	methRate	cov	C_count	methRate	Overall m5C Level
chr1	10232455	-	NM_001102430	Arfgef1	startC	13	3	0.231	18	4	0.222	16	3	0.188	0.213667
chr1	10232468	-	NM_001102430	Arfgef1	startC	10	2	0.2	0	0	0	0	0	0	#
chr1	13589760	-	NM_028173	Tram1	startC	10	2	0.2	0	0	0	0	0	0	#
chr1	34121648	+	uc007aok.1	Dst	startC	10	6	0.6	17	7	0.412	10	6	0.6	0.537333
chr1	34121792	+	uc007aok.1	Dst	startC	15	2	0.133	0	0	0	0	0	0	#
chr1	34164342	+	NM_010081	Dst	CDS	13	9	0.692	18	13	0.722	20	15	0.75	0.721333
chr1	34229107	+	NM_133833	Dst	CDS	40	8	0.2	0	0	0	39	9	0.231	#
chr1	34440099	+	NM_178601	Imp4	startC	21	3	0.143	0	0	0	0	0	0	#
chr1	36471636	+	NM_033570	Cnnm4	startC	11	2	0.182	0	0	0	0	0	0	#
chr1	36471645	+	NM_033570	Cnnm4	startC	10	2	0.2	0	0	0	0	0	0	#
chr1	36471765	+	NM_033570	Cnnm4	startC	16	3	0.188	18	3	0.167	14	2	0.143	0.166
chr1	36471778	+	NM_033570	Cnnm4	startC	15	2	0.133	15	3	0.2	15	2	0.133	0.155333
chr1	36507168	+	NM_033570	Cnnm4	3UTR	14	4	0.286	0	0	0	0	0	0	#
chr1	37441403	-	NM_173870	Mgat4a	3UTR	12	5	0.417	0	0	0	0	0	0	#
chr1	37442492	-	NM_173870	Mgat4a	3UTR	50	12	0.245	61	15	0.246	0	0	0	#
chr1	37443066	-	NM_173870	Mgat4a	3UTR	19	6	0.316	25	6	0.24	0	0	0	#
chr1	37536216	-	NM_173870	Mgat4a	startC	28	3	0.107	33	6	0.182	24	3	0.125	0.138
chr1	37536226	-	NM_173870	Mgat4a	startC	21	3	0.143	24	3	0.125	17	2	0.118	0.128667
chr1	38019396	+	NM_198303	Eif5b	CDS	60	11	0.183	0	0	0	0	0	0	#
chr1	39193849	+	ENSMUST00000173050	Npas2	5UTR	10	2	0.2	0	0	0	0	0	0	#
chr1	39988992	+	NM_008696	Map4k4	CDS	40	9	0.231	0	0	0	0	0	0	#
chr1	52122699	+	NM_009283	Stat1	startC	20	4	0.2	18	2	0.111	0	0	0	#
chr1	52185701	-	NM_001113383	Gls	3UTR	13	4	0.308	0	0	0	0	0	0	#
chr1	58903377	-	NM_172406	Trak2	stopC	12	4	0.333	0	0	0	0	0	0	#
chr1	64532982	+	NM_009952	Creb1	5UTR	40	7	0.175	43	6	0.14	37	6	0.162	0.159
chr1	64532989	+	NM_009952	Creb1	5UTR	40	4	0.1	0	0	0	0	0	0	#
chr1	67166395	+	NM_001080809	Cps1	CDS	90	17	0.189	91	12	0.132	97	16	0.165	0.162
chr1	67195165	+	NM_001080809	Cps1	CDS	22	10	0.455	26	9	0.346	0	0	0	#
chr1	74284507	-	NM_146110	Aamp	startC	13	3	0.231	15	2	0.133	14	2	0.143	0.169
chr1	74284512	-	NM_146110	Aamp	startC	13	2	0.154	16	2	0.125	17	3	0.176	0.151667
chr1	74284521	-	NM_146110	Aamp	startC	15	2	0.133	0	0	0	0	0	0	#
chr1	74284624	-	NM_146110	Aamp	startC	11	2	0.182	15	2	0.133	11	4	0.364	0.226333
chr1	74284626	-	NM_146110	Aamp	startC	10	1	0.1	14	2	0.143	11	3	0.273	0.172
chr1	74284627	-	NM_146110	Aamp	startC	10	2	0.2	0	0	0	0	0	0	#
chr1	74421260	+	NM_009509	Vil1	CDS	45	10	0.222	51	9	0.176	0	0	0	#
chr1	74421303	+	NM_009509	Vil1	CDS	42	9	0.214	0	0	0	0	0	0	#
chr1	74421321	+	NM_009509	Vil1	CDS	32	9	0.281	34	10	0.294	0	0	0	#
chr1	74421814	+	NM_009509	Vil1	CDS	52	11	0.212	83	14	0.169	63	11	0.175	0.185333
chr1	74423880	+	NM_009509	Vil1	CDS	69	10	0.145	0	0	0	62	10	0.161	#
chr1	75360936	+	NM_010043	Des	CDS	22	7	0.318	0	0	0	0	0	0	#
chr1	75367593	+	NM_010043	Des	3UTR	68	16	0.235	76	11	0.145	76	13	0.171	0.183667
chr1	85793484	+	NM_133781	Cab39	5UTR	10	2	0.2	0	0	0	0	0	0	#
chr1	85793528	+	NM_133781	Cab39	5UTR	11	3	0.273	13	3	0.231	14	2	0.143	0.215667
chr1	85793562	+	NM_133781	Cab39	5UTR	25	3	0.12	0	0	0	0	0	0	#
chr1	85793567	+	NM_133781	Cab39	5UTR	24	4	0.167	28	3	0.107	19	4	0.211	0.161667
chr1	85793726	+	NM_133781	Cab39	5UTR	21	3	0.143	0	0	0	0	0	0	#
chr1	85793759	+	NM_133781	Cab39	5UTR	10	2	0.2	0	0	0	0	0	0	#
chr1	85793766	+	NM_133781	Cab39	5UTR	17	3	0.176	27	3	0.111	22	3	0.136	0.141
chr1	85793778	+	NM_133781	Cab39	5UTR	26	5	0.192	34	6	0.176	31	4	0.129	0.165667
chr1	85793784	+	NM_133781	Cab39	5UTR	21	3	0.143	28	4	0.143	30	5	0.167	0.151
chr1	85849205	+	NM_133781	Cab39	stopC	13	4	0.308	0	0	0	0	0	0	#
chr1	86356654	-	NM_010880	Ncl	CDS	74	18	0.243	96	19	0.198	0	0	0	#
chr1	87407138	+	NM_146112	Gigyf2	CDS	35	10	0.286	39	13	0.333	36	15	0.417	0.345333
chr1	92641888	-	NM_001163425	Myeov2	startC	12	2	0.167	13	2	0.154	0	0	0	#
chr1	92641899	-	NM_001163425	Myeov2	startC	14	2	0.143	0	0	0	0	0	0	#
chr1	92641905	-	NM_001163425	Myeov2	startC	12	2	0.167	0	0	0	0	0	0	#
chr1	93635357	-	NM_021537	Stk25	startC	16	5	0.312	17	3	0.176	17	5	0.294	0.260667
chr1	93635360	-	NM_021537	Stk25	startC	12	2	0.167	15	4	0.267	13	2	0.154	0.196
chr1	93635575	-	NM_021537	Stk25	5UTR	15	4	0.267	17	2	0.118	12	2	0.167	0.184
chr1	93635587	-	NM_021537	Stk25	5UTR	14	2	0.143	0	0	0	0	0	0	#
chr1	97821915	-	NM_013626	Pam	stopC	20	5	0.25	27	6	0.222	27	6	0.222	0.231333
chr1	119470842	-	NM_022327	Ralb	3UTR	19	5	0.263	0	0	0	0	0	0	#
chr1	120113505	-	NM_007830	Dbi	stopC	78	16	0.205	102	18	0.176	77	14	0.184	0.188333
chr1	125407341	-	NM_023735	Actr3	CDS	125	13	0.104	0	0	0	0	0	0	#
chr1	125416319	-	NM_023735	Actr3	CDS	35	8	0.229	0	0	0	0	0	0	#
chr1	125561240	+	NM_028787	Slc35f5	startC	10	1	0.1	11	2	0.182	10	2	0.2	0.160667
chr1	125561251	+	NM_028787	Slc35f5	startC	11	5	0.455	10	3	0.3	11	3	0.273	0.342667
chr1	125561263	+	NM_028787	Slc35f5	startC	10	1	0.1	10	1	0.1	10	1	0.1	0.1
chr1	128295268	-	NM_001081078	Lct	CDS	66	15	0.227	91	14	0.154	0	0	0	#
chr1	128300329	-	NM_001081078	Lct	CDS	43	14	0.326	45	15	0.333	40	10	0.25	0.303
chr1	130826763	+	NM_011082	Pigr	5UTR	117	12	0.103	0	0	0	0	0	0	#
chr1	130826768	+	NM_011082	Pigr	5UTR	123	13	0.106	0	0	0	0	0	0	#
chr1	130834412	+	NM_011082	Pigr	startC	14	2	0.143	13	2	0.154	14	2	0.143	0.146667
chr1	130847250	+	NM_011082	Pigr	CDS	29	8	0.276	0	0	0	32	8	0.25	#
chr1	130847496	+	NM_011082	Pigr	CDS	91	22	0.242	100	20	0.2	98	19	0.196	0.212667
chr1	130851655	+	NM_011082	Pigr	3UTR	29	8	0.286	36	10	0.286	32	9	0.29	0.287333
chr1	130852114	+	NM_011082	Pigr	3UTR	16	5	0.312	21	5	0.238	13	4	0.308	0.286
chr1	131816947	+	NM_178079	Pm20d1	3UTR	18	6	0.333	0	0	0	0	0	0	#
chr1	133131654	+	NM_133819	Ppp1r15b	startC	12	3	0.25	16	5	0.312	11	2	0.182	0.248
chr1	133131764	+	NM_133819	Ppp1r15b	startC	15	2	0.133	13	2	0.154	12	2	0.167	0.151333
chr1	133133321	+	NM_133819	Ppp1r15b	CDS	19	6	0.316	0	0	0	23	7	0.304	#
chr1	133137418	+	NM_133819	Ppp1r15b	3UTR	17	8	0.471	27	10	0.37	20	5	0.25	0.363667
chr1	135739439	+	NM_007791	Csrp1	startC	12	2	0.167	15	2	0.133	16	2	0.125	0.141667
chr1	136949294	-	uc007cva.2	Nr5a2	5UTR	12	2	0.167	19	3	0.158	0	0	0	#
chr1	150361893	-	NM_145511	BC003331	3UTR	11	5	0.455	21	5	0.238	0	0	0	#
chr1	151354739	+	NM_054102	Ivns1abp	CDS	33	10	0.303	30	10	0.333	0	0	0	#
chr1	153752850	+	NM_011882	Rnasel	5UTR	11	4	0.364	0	0	0	0	0	0	#
chr1	155098108	-	NM_010500	Ier5	3UTR	17	5	0.294	13	4	0.308	0	0	0	#
chr1	155812717	-	NM_023268	Qsox1	startC	10	3	0.3	0	0	0	0	0	0	#
chr1	155812718	-	NM_023268	Qsox1	startC	10	1	0.1	0	0	0	0	0	0	#
chr1	155871959	-	NM_001039184	Cep350	CDS	61	10	0.164	67	11	0.164	0	0	0	#
chr1	155973084	-	NM_001039184	Cep350	5UTR	12	2	0.167	15	3	0.2	12	2	0.167	0.178
chr1	155973085	-	NM_001039184	Cep350	5UTR	12	2	0.167	15	3	0.2	14	2	0.143	0.17
chr1	155973095	-	NM_001039184	Cep350	5UTR	12	2	0.167	14	2	0.143	0	0	0	#
chr1	156706069	-	NM_145413	Fam20b	startC	30	5	0.167	31	4	0.129	25	3	0.12	0.138667
chr1	156706075	-	NM_145413	Fam20b	startC	30	6	0.2	33	5	0.152	24	4	0.167	0.173
chr1	162710383	-	NM_001081290	Prrc2c	CDS	35	8	0.235	0	0	0	0	0	0	#
chr1	162710406	-	NM_001081290	Prrc2c	CDS	50	9	0.18	50	10	0.204	0	0	0	#
chr1	162710529	-	NM_001081290	Prrc2c	CDS	109	17	0.156	127	17	0.135	0	0	0	#
chr1	164437591	-	NM_009721	Atp1b1	3UTR	20	6	0.3	0	0	0	0	0	0	#
chr1	164457780	-	NM_009721	Atp1b1	startC	38	5	0.132	45	7	0.156	40	8	0.2	0.162667
chr1	164457852	-	NM_009721	Atp1b1	startC	74	8	0.108	88	10	0.114	62	7	0.113	0.111667
chr1	164457905	-	NM_009721	Atp1b1	startC	36	4	0.111	41	5	0.122	43	6	0.14	0.124333
chr1	164457911	-	NM_009721	Atp1b1	startC	48	5	0.104	51	7	0.137	47	8	0.17	0.137
chr1	164457920	-	NM_009721	Atp1b1	startC	40	5	0.125	53	7	0.132	39	5	0.128	0.128333
chr1	164457929	-	NM_009721	Atp1b1	startC	35	4	0.114	0	0	0	0	0	0	#
chr1	164457951	-	NM_009721	Atp1b1	startC	16	2	0.125	18	4	0.222	10	3	0.3	0.215667
chr1	164457956	-	NM_009721	Atp1b1	startC	13	2	0.154	18	3	0.167	10	1	0.1	0.140333
chr1	164458023	-	NM_009721	Atp1b1	startC	10	1	0.1	13	2	0.154	13	2	0.154	0.136
chr1	164458105	-	NM_009721	Atp1b1	5UTR	14	3	0.214	18	3	0.167	13	6	0.462	0.281
chr1	164458117	-	NM_009721	Atp1b1	5UTR	21	3	0.15	25	6	0.24	19	5	0.263	0.217667
chr1	164458132	-	NM_009721	Atp1b1	5UTR	18	2	0.111	22	3	0.136	20	2	0.1	0.115667
chr1	164458143	-	NM_009721	Atp1b1	5UTR	30	5	0.167	39	7	0.179	28	5	0.179	0.175
chr1	164458152	-	NM_009721	Atp1b1	5UTR	33	6	0.182	48	5	0.106	32	5	0.156	0.148
chr1	164458174	-	NM_009721	Atp1b1	5UTR	36	10	0.278	46	10	0.217	37	6	0.162	0.219
chr1	164458185	-	NM_009721	Atp1b1	5UTR	20	3	0.15	18	2	0.111	17	3	0.176	0.145667
chr1	164458186	-	NM_009721	Atp1b1	5UTR	20	2	0.1	20	3	0.15	19	3	0.158	0.136
chr1	164458193	-	NM_009721	Atp1b1	5UTR	18	2	0.111	19	3	0.158	17	4	0.235	0.168
chr1	164458200	-	NM_009721	Atp1b1	5UTR	17	3	0.176	15	2	0.133	17	3	0.176	0.161667
chr1	164458209	-	NM_009721	Atp1b1	5UTR	12	2	0.167	0	0	0	13	2	0.154	#
chr1	166165210	+	NM_021610	Gpa33	stopC	77	12	0.156	65	8	0.123	67	8	0.119	0.132667
chr1	167350362	+	NM_019993	Aldh9a1	startC	15	3	0.2	18	2	0.111	14	4	0.286	0.199
chr1	167350372	+	NM_019993	Aldh9a1	startC	24	4	0.167	32	5	0.156	24	4	0.167	0.163333
chr1	171247058	-	NM_153064	Ndufs2	startC	13	4	0.308	14	2	0.143	18	3	0.167	0.206
chr1	171247059	-	NM_153064	Ndufs2	startC	14	3	0.214	14	2	0.143	18	4	0.222	0.193
chr1	171247070	-	NM_153064	Ndufs2	startC	14	2	0.143	15	2	0.133	17	2	0.118	0.131333
chr1	171518202	-	NM_010584	Itln1	stopC	12	4	0.333	17	6	0.353	13	4	0.308	0.331333
chr1	171529151	-	NM_010584	Itln1	CDS	24	8	0.333	0	0	0	0	0	0	#
chr1	171533381	-	NM_010584	Itln1	CDS	11	5	0.455	0	0	0	0	0	0	#
chr1	171535236	-	NM_010584	Itln1	5UTR	17	4	0.235	17	4	0.235	15	3	0.2	0.223333
chr1	172082903	+	NM_009938	Copa	startC	20	4	0.2	24	4	0.167	22	5	0.227	0.198
chr1	172117000	+	NM_009938	Copa	CDS	39	12	0.308	46	10	0.217	38	8	0.211	0.245333
chr1	172117257	+	NM_009938	Copa	CDS	53	18	0.34	51	13	0.255	49	14	0.286	0.293667
chr1	172505193	+	NM_178598	Tagln2	startC	27	4	0.148	0	0	0	0	0	0	#
chr1	173277665	-	NM_001205011	Mptx2	startC	20	3	0.15	0	0	0	0	0	0	#
chr1	178337290	-	NM_016805	Hnrnpu	CDS	25	7	0.28	0	0	0	25	7	0.28	#
chr1	178337412	-	NM_016805	Hnrnpu	startC	10	1	0.1	0	0	0	0	0	0	#
chr1	178337419	-	NM_016805	Hnrnpu	startC	11	2	0.182	0	0	0	0	0	0	#
chr1	178337420	-	NM_016805	Hnrnpu	startC	11	2	0.182	10	2	0.2	10	1	0.1	0.160667
chr1	178337512	-	NM_016805	Hnrnpu	startC	10	1	0.1	10	1	0.1	0	0	0	#
chr1	178337514	-	NM_016805	Hnrnpu	startC	10	1	0.1	0	0	0	0	0	0	#
chr1	180736741	+	NM_133225	Acbd3	CDS	66	11	0.167	0	0	0	0	0	0	#
chr1	184872461	-	NM_178692	C130074G19Rik	3UTR	28	7	0.25	0	0	0	0	0	0	#
chr1	184882842	-	NM_178692	C130074G19Rik	startC	14	3	0.214	19	2	0.105	14	3	0.214	0.177667
chr1	184882847	-	NM_178692	C130074G19Rik	startC	18	2	0.111	19	2	0.105	0	0	0	#
chr1	184882848	-	NM_178692	C130074G19Rik	startC	17	2	0.118	19	2	0.105	15	2	0.133	0.118667
chr1	184882855	-	NM_178692	C130074G19Rik	startC	19	2	0.105	20	2	0.1	17	3	0.176	0.127
chr1	184882856	-	NM_178692	C130074G19Rik	startC	19	2	0.105	19	2	0.105	0	0	0	#
chr1	184882869	-	NM_178692	C130074G19Rik	startC	16	2	0.125	19	2	0.105	18	2	0.111	0.113667
chr1	185332205	+	NM_011794	Bpnt1	5UTR	18	2	0.111	17	3	0.176	19	3	0.158	0.148333
chr1	185332211	+	NM_011794	Bpnt1	5UTR	15	2	0.133	19	4	0.222	21	5	0.238	0.197667
chr1	185332212	+	NM_011794	Bpnt1	5UTR	15	2	0.133	19	3	0.158	22	3	0.136	0.142333
chr1	185332227	+	NM_011794	Bpnt1	5UTR	14	2	0.143	0	0	0	0	0	0	#
chr1	185345374	+	NM_011794	Bpnt1	CDS	40	8	0.2	0	0	0	0	0	0	#
chr1	191171651	-	NM_007498	Atf3	stopC	24	6	0.25	0	0	0	0	0	0	#
chr1	191353057	-	NM_144880	Ppp2r5a	stopC	13	4	0.308	11	4	0.364	0	0	0	#
chr1	191396423	-	NM_144880	Ppp2r5a	startC	10	3	0.3	0	0	0	12	3	0.25	#
chr1	191396428	-	NM_144880	Ppp2r5a	startC	10	1	0.1	0	0	0	0	0	0	#
chr1	191781170	+	NM_172266	Lpgat1	3UTR	63	7	0.113	0	0	0	57	8	0.14	#
chr1	191781210	+	NM_172266	Lpgat1	3UTR	64	9	0.141	67	12	0.179	65	9	0.138	0.152667
chr1	12718733	+	NM_172294	Sulf1	5UTR	0	0	0	10	1	0.1	0	0	0	#
chr1	36507195	+	NM_033570	Cnnm4	3UTR	0	0	0	19	5	0.263	0	0	0	#
chr1	39989020	+	NM_008696	Map4k4	CDS	0	0	0	34	9	0.265	0	0	0	#
chr1	39997072	+	NM_008696	Map4k4	CDS	0	0	0	23	8	0.348	0	0	0	#
chr1	43163764	-	NM_010212	Fhl2	5UTR	0	0	0	13	3	0.231	0	0	0	#
chr1	58421873	-	NM_001042634	Clk1	startC	0	0	0	30	3	0.1	18	2	0.111	#
chr1	63164805	-	NM_145518	Ndufs1	CDS	0	0	0	23	8	0.348	0	0	0	#
chr1	67123188	+	NM_001080809	Cps1	startC	0	0	0	22	3	0.136	0	0	0	#
chr1	74236822	+	NM_029711	Arpc2	startC	0	0	0	18	3	0.167	0	0	0	#
chr1	74421805	+	NM_009509	Vil1	CDS	0	0	0	76	11	0.145	0	0	0	#
chr1	74422989	+	NM_009509	Vil1	CDS	0	0	0	33	8	0.242	32	8	0.25	#
chr1	74430667	+	NM_009509	Vil1	CDS	0	0	0	70	12	0.171	57	11	0.193	#
chr1	75367564	+	NM_010043	Des	3UTR	0	0	0	66	12	0.182	0	0	0	#
chr1	75367567	+	NM_010043	Des	3UTR	0	0	0	76	9	0.118	0	0	0	#
chr1	86529175	+	NM_008972	Ptma	CDS	0	0	0	107	14	0.131	0	0	0	#
chr1	92641907	-	NM_001163425	Myeov2	startC	0	0	0	14	3	0.214	0	0	0	#
chr1	97741117	-	NM_173760	Ppip5k2	CDS	0	0	0	19	6	0.316	12	6	0.5	#
chr1	125435361	-	NM_023735	Actr3	startC	0	0	0	14	2	0.143	0	0	0	#
chr1	125873288	+	NM_027677	Gpr39	3UTR	0	0	0	11	4	0.364	0	0	0	#
chr1	128277044	+	NM_026390	Ubxn4	stopC	0	0	0	22	5	0.227	0	0	0	#
chr1	128291944	-	NM_001081078	Lct	CDS	0	0	0	11	5	0.455	0	0	0	#
chr1	130826784	+	NM_011082	Pigr	5UTR	0	0	0	154	21	0.136	0	0	0	#
chr1	130844919	+	NM_011082	Pigr	CDS	0	0	0	82	13	0.159	0	0	0	#
chr1	130844985	+	NM_011082	Pigr	CDS	0	0	0	60	14	0.233	0	0	0	#
chr1	130846451	+	NM_011082	Pigr	CDS	0	0	0	50	9	0.184	0	0	0	#
chr1	130849755	+	NM_011082	Pigr	CDS	0	0	0	137	19	0.139	0	0	0	#
chr1	130849756	+	NM_011082	Pigr	CDS	0	0	0	142	15	0.106	0	0	0	#
chr1	130850882	+	NM_011082	Pigr	stopC	0	0	0	12	4	0.333	0	0	0	#
chr1	130851086	+	NM_011082	Pigr	stopC	0	0	0	65	9	0.138	0	0	0	#
chr1	130852094	+	NM_011082	Pigr	3UTR	0	0	0	133	18	0.135	0	0	0	#
chr1	133131665	+	NM_133819	Ppp1r15b	startC	0	0	0	15	2	0.133	0	0	0	#
chr1	133133328	+	NM_133819	Ppp1r15b	CDS	0	0	0	26	7	0.269	24	7	0.292	#
chr1	155098733	-	NM_010500	Ier5	CDS	0	0	0	17	6	0.353	0	0	0	#
chr1	155812723	-	NM_023268	Qsox1	startC	0	0	0	14	3	0.214	0	0	0	#
chr1	162705432	-	NM_001081290	Prrc2c	CDS	0	0	0	22	7	0.318	0	0	0	#
chr1	162706038	-	NM_001081290	Prrc2c	CDS	0	0	0	76	11	0.147	0	0	0	#
chr1	164457935	-	NM_009721	Atp1b1	startC	0	0	0	34	4	0.118	0	0	0	#
chr1	164458134	-	NM_009721	Atp1b1	5UTR	0	0	0	22	4	0.182	0	0	0	#
chr1	164458135	-	NM_009721	Atp1b1	5UTR	0	0	0	26	3	0.115	22	3	0.136	#
chr1	169694597	+	ENSMUST00000027997	Rgs5	3UTR	0	0	0	25	5	0.2	0	0	0	#
chr1	171214408	+	NM_009803	Nr1i3	startC	0	0	0	10	2	0.2	0	0	0	#
chr1	171418630	+	NM_009480	Usf1	3UTR	0	0	0	11	4	0.364	0	0	0	#
chr1	171518214	-	NM_010584	Itln1	stopC	0	0	0	18	7	0.389	0	0	0	#
chr1	171529155	-	NM_010584	Itln1	CDS	0	0	0	24	8	0.333	0	0	0	#
chr1	171535246	-	NM_010584	Itln1	5UTR	0	0	0	13	2	0.154	0	0	0	#
chr1	172082902	+	NM_009938	Copa	startC	0	0	0	23	3	0.13	0	0	0	#
chr1	172117006	+	NM_009938	Copa	CDS	0	0	0	50	9	0.18	0	0	0	#
chr1	180580548	+	NM_007415	Parp1	CDS	0	0	0	19	6	0.316	0	0	0	#
chr1	180736782	+	NM_133225	Acbd3	CDS	0	0	0	60	11	0.183	0	0	0	#
chr1	184882880	-	NM_178692	C130074G19Rik	startC	0	0	0	11	3	0.273	0	0	0	#
chr1	191781129	+	NM_172266	Lpgat1	3UTR	0	0	0	67	9	0.134	54	7	0.13	#
chr1	36266552	-	NM_153408	Neurl3	stopC	0	0	0	0	0	0	13	4	0.308	#
chr1	36471642	+	NM_033570	Cnnm4	startC	0	0	0	0	0	0	16	4	0.25	#
chr1	39263349	+	NM_008719	Npas2	startC	0	0	0	0	0	0	10	1	0.1	#
chr1	39997099	+	NM_008696	Map4k4	CDS	0	0	0	0	0	0	26	7	0.269	#
chr1	40024988	+	NM_008696	Map4k4	3UTR	0	0	0	0	0	0	16	4	0.25	#
chr1	52122698	+	NM_009283	Stat1	startC	0	0	0	0	0	0	19	4	0.211	#
chr1	52122705	+	NM_009283	Stat1	startC	0	0	0	0	0	0	19	2	0.105	#
chr1	55088287	+	NM_008303	Hspe1	startC	0	0	0	0	0	0	20	5	0.25	#
chr1	64532965	+	NM_009952	Creb1	5UTR	0	0	0	0	0	0	24	4	0.182	#
chr1	64731389	-	NM_022721	Fzd5	3UTR	0	0	0	0	0	0	25	5	0.2	#
chr1	64731677	-	NM_022721	Fzd5	3UTR	0	0	0	0	0	0	14	5	0.357	#
chr1	67123184	+	NM_001080809	Cps1	startC	0	0	0	0	0	0	17	2	0.118	#
chr1	74432417	+	NM_009509	Vil1	CDS	0	0	0	0	0	0	207	27	0.13	#
chr1	75215643	-	NM_009447	Tuba4a	stopC	0	0	0	0	0	0	26	6	0.231	#
chr1	75360898	+	NM_010043	Des	CDS	0	0	0	0	0	0	23	7	0.304	#
chr1	80290111	-	NM_016716	Cul3	CDS	0	0	0	0	0	0	13	5	0.385	#
chr1	86529484	+	NM_008972	Ptma	CDS	0	0	0	0	0	0	15	7	0.467	#
chr1	87098900	-	NM_001081082	Alpi	CDS	0	0	0	0	0	0	29	9	0.31	#
chr1	130841787	+	NM_011082	Pigr	CDS	0	0	0	0	0	0	33	9	0.273	#
chr1	130844986	+	NM_011082	Pigr	CDS	0	0	0	0	0	0	59	12	0.203	#
chr1	130847469	+	NM_011082	Pigr	CDS	0	0	0	0	0	0	197	22	0.112	#
chr1	130849543	+	NM_011082	Pigr	CDS	0	0	0	0	0	0	73	13	0.178	#
chr1	133131760	+	NM_133819	Ppp1r15b	startC	0	0	0	0	0	0	14	3	0.214	#
chr1	133281852	+	NM_182930	Plekha6	CDS	0	0	0	0	0	0	28	7	0.25	#
chr1	133661291	-	NM_144530	Zc3h11a	5UTR	0	0	0	0	0	0	19	3	0.158	#
chr1	162698905	-	NM_001081290	Prrc2c	CDS	0	0	0	0	0	0	30	9	0.3	#
chr1	162710639	-	NM_001081290	Prrc2c	CDS	0	0	0	0	0	0	36	8	0.229	#
chr1	164457775	-	NM_009721	Atp1b1	startC	0	0	0	0	0	0	31	10	0.323	#
chr1	164457888	-	NM_009721	Atp1b1	startC	0	0	0	0	0	0	25	4	0.16	#
chr1	164458110	-	NM_009721	Atp1b1	5UTR	0	0	0	0	0	0	20	4	0.2	#
chr1	171173679	-	NM_025557	Pcp4l1	3UTR	0	0	0	0	0	0	14	4	0.286	#
chr1	171247067	-	NM_153064	Ndufs2	startC	0	0	0	0	0	0	18	2	0.111	#
chr1	171518303	-	NM_010584	Itln1	stopC	0	0	0	0	0	0	108	11	0.102	#
chr1	172082887	+	NM_009938	Copa	startC	0	0	0	0	0	0	19	2	0.105	#
chr1	172148238	+	uc007dpw.2	Dcaf8	5UTR	0	0	0	0	0	0	10	1	0.1	#
chr1	183357406	-	NM_177389	Mia3	CDS	0	0	0	0	0	0	48	11	0.229	#
chr1	184873381	-	NM_178692	C130074G19Rik	3UTR	0	0	0	0	0	0	15	4	0.267	#
chr1	184882877	-	NM_178692	C130074G19Rik	startC	0	0	0	0	0	0	13	2	0.154	#
chr1	185345356	+	NM_011794	Bpnt1	CDS	0	0	0	0	0	0	71	12	0.169	#
chr2	5045987	-	NM_181848	Optn	CDS	13	5	0.385	0	0	0	0	0	0	#
chr2	5957666	+	NM_001081132	Upf2	startC	10	2	0.2	18	3	0.167	10	1	0.1	0.155667
chr2	23040056	-	NM_007380	Abi1	startC	25	3	0.12	0	0	0	0	0	0	#
chr2	25365579	-	NM_001033293	Uap1l1	startC	16	3	0.188	14	2	0.143	15	4	0.267	0.199333
chr2	25557895	+	ENSMUST00000015236	Edf1	startC	10	2	0.2	17	3	0.176	11	2	0.182	0.186
chr2	25557903	+	NM_021519	Edf1	startC	10	2	0.2	0	0	0	0	0	0	#
chr2	25557943	+	NM_021519	Edf1	startC	12	2	0.167	20	2	0.1	20	2	0.1	0.122333
chr2	25557946	+	NM_021519	Edf1	startC	11	2	0.182	18	2	0.111	18	4	0.222	0.171667
chr2	26921136	-	NM_011512	Surf4	3UTR	15	5	0.333	0	0	0	0	0	0	#
chr2	26933307	-	NM_011512	Surf4	startC	10	1	0.1	10	2	0.2	10	1	0.1	0.133333
chr2	26933327	-	NM_011512	Surf4	startC	10	1	0.1	12	3	0.25	14	2	0.143	0.164333
chr2	26933363	-	NM_011512	Surf4	startC	10	2	0.2	0	0	0	0	0	0	#
chr2	26964181	-	NM_207234	Rexo4	startC	13	2	0.154	0	0	0	0	0	0	#
chr2	27886550	+	NM_015734	Col5a1	5UTR	10	3	0.3	0	0	0	0	0	0	#
chr2	29738082	+	NM_054050	Rapgef1	stopC	18	5	0.278	0	0	0	15	6	0.4	#
chr2	29802813	+	NM_011989	Slc27a4	5UTR	15	3	0.2	17	2	0.118	20	3	0.15	0.156
chr2	29802819	+	NM_011989	Slc27a4	5UTR	24	3	0.125	0	0	0	0	0	0	#
chr2	29802828	+	NM_011989	Slc27a4	5UTR	23	6	0.261	35	6	0.171	30	9	0.3	0.244
chr2	29802839	+	NM_011989	Slc27a4	5UTR	32	9	0.281	41	8	0.195	38	6	0.158	0.211333
chr2	29802859	+	NM_011989	Slc27a4	5UTR	38	5	0.132	41	6	0.146	34	5	0.147	0.141667
chr2	29802868	+	NM_011989	Slc27a4	5UTR	33	9	0.273	37	8	0.216	31	9	0.29	0.259667
chr2	29802870	+	NM_011989	Slc27a4	5UTR	28	4	0.143	0	0	0	0	0	0	#
chr2	29802876	+	NM_011989	Slc27a4	5UTR	17	3	0.176	0	0	0	20	2	0.1	#
chr2	29802927	+	NM_011989	Slc27a4	5UTR	14	2	0.143	0	0	0	0	0	0	#
chr2	29802931	+	NM_011989	Slc27a4	5UTR	14	2	0.143	0	0	0	0	0	0	#
chr2	30133854	+	ENSMUST00000044556	Tbc1d13	startC	19	3	0.158	0	0	0	0	0	0	#
chr2	30133866	+	ENSMUST00000044556	Tbc1d13	startC	16	3	0.188	18	3	0.167	14	4	0.286	0.213667
chr2	32304244	+	NM_133852	Golga2	CDS	36	8	0.222	0	0	0	36	8	0.222	#
chr2	32363501	+	NM_001252534	Ciz1	5UTR	13	3	0.231	12	3	0.25	10	1	0.1	0.193667
chr2	34772132	+	NM_022310	Hspa5	startC	11	2	0.182	0	0	0	0	0	0	#
chr2	37357283	-	NM_026176	Pdcl	startC	13	2	0.154	0	0	0	0	0	0	#
chr2	37357297	-	NM_026176	Pdcl	startC	16	3	0.188	25	6	0.24	20	3	0.15	0.192667
chr2	37357298	-	NM_026176	Pdcl	startC	16	3	0.188	25	5	0.2	19	5	0.263	0.217
chr2	39226235	-	NM_024209	Ppp6c	startC	10	1	0.1	0	0	0	10	1	0.1	#
chr2	59699377	+	NM_198294	Tanc1	startC	10	2	0.2	0	0	0	0	0	0	#
chr2	59699382	+	NM_198294	Tanc1	startC	10	2	0.2	0	0	0	0	0	0	#
chr2	62332195	-	NM_010074	Dpp4	3UTR	36	8	0.222	51	11	0.216	42	6	0.143	0.193667
chr2	62352153	-	NM_010074	Dpp4	CDS	19	7	0.368	20	8	0.4	0	0	0	#
chr2	70754469	-	NM_172664	Tlk1	CDS	14	5	0.385	0	0	0	0	0	0	#
chr2	73911012	-	NM_175015	Atp5g3	startC	13	2	0.154	0	0	0	0	0	0	#
chr2	73911274	-	NM_175015	Atp5g3	5UTR	31	4	0.129	33	4	0.121	30	4	0.133	0.127667
chr2	79635662	+	NM_080558	Ssfa2	startC	16	2	0.125	18	3	0.167	17	3	0.176	0.156
chr2	79635676	+	NM_080558	Ssfa2	startC	22	4	0.182	24	5	0.208	20	3	0.15	0.18
chr2	79635711	+	NM_080558	Ssfa2	startC	16	2	0.125	0	0	0	0	0	0	#
chr2	79635712	+	NM_080558	Ssfa2	startC	14	3	0.214	13	2	0.154	11	2	0.182	0.183333
chr2	79635733	+	NM_080558	Ssfa2	startC	13	3	0.231	13	3	0.231	10	2	0.2	0.220667
chr2	83644696	+	NM_026934	Zc3h15	startC	32	5	0.161	0	0	0	30	4	0.133	#
chr2	84650514	-	NM_007615	Ctnnd1	5UTR	198	21	0.107	232	28	0.121	188	26	0.138	0.122
chr2	84650520	-	NM_007615	Ctnnd1	5UTR	263	44	0.167	292	43	0.147	232	29	0.126	0.146667
chr2	84650568	-	NM_007615	Ctnnd1	5UTR	41	6	0.146	0	0	0	0	0	0	#
chr2	84650569	-	NM_007615	Ctnnd1	5UTR	38	8	0.211	35	7	0.2	29	3	0.103	0.171333
chr2	84650593	-	NM_007615	Ctnnd1	5UTR	33	6	0.182	37	8	0.216	32	5	0.156	0.184667
chr2	91054312	+	NM_008948	Psmc3	startC	18	2	0.111	33	5	0.152	25	4	0.16	0.141
chr2	91054313	+	NM_008948	Psmc3	startC	19	5	0.263	32	6	0.188	26	3	0.115	0.188667
chr2	104059974	+	NM_212433	Fbxo3	stopC	18	5	0.278	0	0	0	0	0	0	#
chr2	109917661	+	NM_172671	Lgr4	5UTR	28	4	0.143	23	4	0.174	18	2	0.111	0.142667
chr2	109917676	+	NM_172671	Lgr4	5UTR	15	3	0.2	0	0	0	0	0	0	#
chr2	109917953	+	NM_172671	Lgr4	startC	14	2	0.143	15	2	0.133	13	2	0.154	0.143333
chr2	109917974	+	NM_172671	Lgr4	startC	21	3	0.143	0	0	0	16	2	0.125	#
chr2	109917978	+	NM_172671	Lgr4	startC	20	3	0.15	22	3	0.136	15	2	0.133	0.139667
chr2	112455258	+	NM_133749	Emc7	startC	22	3	0.136	26	3	0.115	22	3	0.136	0.129
chr2	112455259	+	NM_133749	Emc7	startC	21	6	0.286	27	3	0.115	23	8	0.348	0.249667
chr2	113848252	-	NM_181416	Arhgap11a	startC	26	5	0.192	29	4	0.138	25	5	0.2	0.176667
chr2	113848299	-	NM_181416	Arhgap11a	5UTR	25	7	0.28	42	8	0.19	33	5	0.152	0.207333
chr2	119142667	-	NM_001033136	Rmdn3	CDS	69	11	0.159	0	0	0	0	0	0	#
chr2	119147516	-	NM_001033136	Rmdn3	CDS	76	11	0.145	0	0	0	0	0	0	#
chr2	119229604	-	NM_028104	Ppp1r14d	startC	15	2	0.133	0	0	0	0	0	0	#
chr2	119229624	-	NM_028104	Ppp1r14d	startC	18	2	0.111	20	3	0.15	22	4	0.182	0.147667
chr2	119229720	-	NM_028104	Ppp1r14d	startC	47	9	0.191	49	9	0.184	49	11	0.224	0.199667
chr2	119229723	-	NM_028104	Ppp1r14d	startC	49	5	0.102	0	0	0	0	0	0	#
chr2	119229728	-	NM_028104	Ppp1r14d	startC	48	8	0.167	0	0	0	0	0	0	#
chr2	119229731	-	NM_028104	Ppp1r14d	startC	51	8	0.157	52	7	0.135	51	7	0.137	0.143
chr2	119237881	+	NM_016907	Spint1	startC	13	2	0.154	0	0	0	0	0	0	#
chr2	119237884	+	NM_016907	Spint1	startC	11	2	0.182	0	0	0	13	2	0.154	#
chr2	119237890	+	NM_016907	Spint1	startC	13	4	0.308	14	2	0.143	13	3	0.231	0.227333
chr2	119547892	+	NM_019769	Chp1	startC	25	6	0.24	26	4	0.154	25	5	0.2	0.198
chr2	120567771	+	NM_009222	Snap23	5UTR	14	2	0.143	14	2	0.143	16	2	0.125	0.137
chr2	121357771	+	ENSMUST00000125812	Ckmt1	5UTR	10	1	0.1	10	2	0.2	10	1	0.1	0.133333
chr2	121357775	+	ENSMUST00000125812	Ckmt1	5UTR	10	2	0.2	11	3	0.273	10	2	0.2	0.224333
chr2	121358945	+	NM_009897	Ckmt1	startC	18	3	0.167	26	3	0.115	17	2	0.118	0.133333
chr2	121360694	+	NM_009897	Ckmt1	CDS	62	10	0.161	80	14	0.175	0	0	0	#
chr2	121360703	+	NM_009897	Ckmt1	CDS	66	10	0.152	73	12	0.164	67	10	0.149	0.155
chr2	121361215	+	NM_009897	Ckmt1	CDS	122	13	0.107	161	19	0.119	111	21	0.191	0.139
chr2	121361220	+	NM_009897	Ckmt1	CDS	118	22	0.186	144	19	0.132	106	13	0.123	0.147
chr2	121363011	+	NM_009897	Ckmt1	CDS	41	10	0.244	47	11	0.234	42	9	0.214	0.230667
chr2	121457137	+	NM_026318	Hypk	startC	44	6	0.136	44	6	0.136	0	0	0	#
chr2	121457138	+	NM_026318	Hypk	startC	46	5	0.109	0	0	0	42	6	0.143	#
chr2	121457147	+	NM_026318	Hypk	startC	45	13	0.289	56	10	0.179	47	11	0.234	0.234
chr2	121457174	+	NM_026318	Hypk	startC	18	3	0.167	16	4	0.25	16	3	0.188	0.201667
chr2	121457181	+	NM_026318	Hypk	startC	17	2	0.118	16	3	0.188	16	3	0.188	0.164667
chr2	121457238	+	NM_026318	Hypk	startC	10	2	0.2	0	0	0	0	0	0	#
chr2	122147754	+	NM_009735	B2m	startC	17	2	0.118	18	2	0.111	11	2	0.182	0.137
chr2	122147761	+	NM_009735	B2m	startC	15	4	0.267	19	3	0.158	10	4	0.4	0.275
chr2	122147765	+	NM_009735	B2m	startC	14	4	0.286	19	6	0.316	10	1	0.1	0.234
chr2	122147771	+	NM_009735	B2m	startC	14	2	0.143	16	3	0.188	0	0	0	#
chr2	122147776	+	NM_009735	B2m	startC	10	3	0.3	15	2	0.133	10	1	0.1	0.177667
chr2	122702465	-	NM_011774	Slc30a4	startC	23	3	0.13	19	2	0.105	18	3	0.167	0.134
chr2	122702474	-	NM_011774	Slc30a4	startC	24	4	0.167	21	4	0.19	18	3	0.167	0.174667
chr2	127142065	-	NM_001163527	Itpripl1	startC	19	4	0.211	30	5	0.167	20	4	0.2	0.192667
chr2	131178258	-	NM_007682	Cenpb	stopC	13	4	0.308	0	0	0	12	4	0.333	#
chr2	132793570	+	NM_007694	Chgb	CDS	16	6	0.375	0	0	0	18	7	0.389	#
chr2	142712791	-	NM_001081133	Kif16b	CDS	10	7	0.7	0	0	0	12	5	0.417	#
chr2	143938566	+	NM_019771	Dstn	CDS	16	6	0.375	0	0	0	0	0	0	#
chr2	143947523	-	NM_024281	Rrbp1	3UTR	28	5	0.179	36	6	0.167	0	0	0	#
chr2	143947526	-	NM_024281	Rrbp1	3UTR	28	10	0.357	36	9	0.25	28	9	0.321	0.309333
chr2	143950476	-	NM_024281	Rrbp1	CDS	52	9	0.173	0	0	0	0	0	0	#
chr2	143988994	-	NM_024281	Rrbp1	CDS	103	16	0.155	0	0	0	101	17	0.168	#
chr2	144011139	-	NM_024281	Rrbp1	5UTR	18	3	0.167	16	2	0.125	14	2	0.143	0.145
chr2	144011164	-	NM_024281	Rrbp1	5UTR	14	6	0.429	0	0	0	0	0	0	#
chr2	146434802	-	NM_001033348	Ralgapa2	CDS	13	5	0.385	0	0	0	0	0	0	#
chr2	148875229	-	NM_009976	Cst3	startC	11	2	0.182	0	0	0	0	0	0	#
chr2	148875245	-	NM_009976	Cst3	startC	13	3	0.231	15	2	0.143	10	3	0.333	0.235667
chr2	148875252	-	NM_009976	Cst3	startC	15	5	0.333	0	0	0	0	0	0	#
chr2	148875271	-	NM_009976	Cst3	startC	16	2	0.125	17	2	0.118	13	2	0.154	0.132333
chr2	150904366	-	NM_024465	Abhd12	startC	12	4	0.333	10	2	0.222	13	2	0.154	0.236333
chr2	150904370	-	NM_024465	Abhd12	startC	12	3	0.25	0	0	0	0	0	0	#
chr2	151572689	+	NM_145535	Sdcbp2	5UTR	15	2	0.133	0	0	0	0	0	0	#
chr2	152736454	+	NM_010495	Id1	startC	10	2	0.2	10	2	0.2	10	1	0.1	0.166667
chr2	153346317	+	NM_001039939	Asxl1	startC	16	3	0.188	15	3	0.2	14	2	0.143	0.177
chr2	153346322	+	NM_001039939	Asxl1	startC	21	3	0.143	23	5	0.217	22	6	0.273	0.211
chr2	153346342	+	NM_001039939	Asxl1	startC	28	5	0.179	28	3	0.107	23	4	0.174	0.153333
chr2	153741380	+	NM_007896	Mapre1	5UTR	14	2	0.143	17	2	0.118	15	2	0.133	0.131333
chr2	154657123	+	NM_029362	Chmp4b	startC	35	9	0.257	38	8	0.211	35	7	0.2	0.222667
chr2	154888217	-	NM_026030	Eif2s2	CDS	70	17	0.243	92	16	0.174	0	0	0	#
chr2	154888240	-	NM_026030	Eif2s2	CDS	45	13	0.289	0	0	0	0	0	0	#
chr2	155826489	-	NM_010579	Eif6	startC	12	2	0.167	0	0	0	0	0	0	#
chr2	155826504	-	NM_010579	Eif6	startC	10	1	0.1	14	4	0.286	10	1	0.1	0.162
chr2	156172919	-	NM_133242	Rbm39	CDS	89	11	0.124	0	0	0	93	13	0.14	#
chr2	156778553	+	NM_172118	Myl9	startC	11	3	0.273	13	2	0.154	17	3	0.176	0.201
chr2	157470760	+	NM_009271	Src	3UTR	17	4	0.235	0	0	0	15	5	0.333	#
chr2	163570864	+	NM_008261	Hnf4a	3UTR	36	8	0.222	33	9	0.273	38	10	0.263	0.252667
chr2	163703534	+	NM_011106	Pkig	5UTR	10	2	0.2	13	2	0.154	10	1	0.1	0.151333
chr2	163731163	-	NM_007398	Ada	CDS	40	10	0.25	0	0	0	39	8	0.205	#
chr2	163731175	-	NM_007398	Ada	CDS	35	8	0.229	47	9	0.191	0	0	0	#
chr2	163731184	-	NM_007398	Ada	CDS	30	7	0.233	42	9	0.214	31	8	0.258	0.235
chr2	163750093	-	NM_007398	Ada	startC	10	1	0.1	12	2	0.167	13	2	0.154	0.140333
chr2	163750098	-	NM_007398	Ada	startC	10	1	0.1	12	2	0.167	12	2	0.167	0.144667
chr2	163750120	-	NM_007398	Ada	startC	24	4	0.167	31	5	0.161	22	3	0.136	0.154667
chr2	163995285	+	NM_018753	Ywhab	5UTR	14	2	0.143	0	0	0	0	0	0	#
chr2	163995297	+	NM_018753	Ywhab	5UTR	13	2	0.154	17	4	0.235	11	2	0.182	0.190333
chr2	164792928	-	NM_133240	Acot8	stopC	24	7	0.292	0	0	0	0	0	0	#
chr2	167503474	+	NM_030743	Rnf114	startC	10	1	0.1	0	0	0	0	0	0	#
chr2	167503482	+	NM_030743	Rnf114	startC	10	1	0.1	10	2	0.2	12	2	0.167	0.155667
chr2	172440723	+	NM_025542	Rtfdc1	startC	13	2	0.154	22	3	0.136	16	2	0.125	0.138333
chr2	174328805	+	uc008oez.1	Gnas	5UTR	18	2	0.111	25	3	0.12	26	3	0.115	0.115333
chr2	174330158	+	NM_201616	Gnas	startC	15	2	0.133	0	0	0	0	0	0	#
chr2	174330178	+	NM_201616	Gnas	startC	19	3	0.158	24	4	0.167	17	2	0.118	0.147667
chr2	174330189	+	NM_201616	Gnas	startC	13	3	0.231	20	3	0.15	13	3	0.231	0.204
chr2	174330195	+	NM_201616	Gnas	startC	10	1	0.1	0	0	0	0	0	0	#
chr2	174330348	+	NM_201616	Gnas	startC	62	8	0.129	87	11	0.129	57	6	0.107	0.121667
chr2	174330355	+	NM_201616	Gnas	startC	67	12	0.179	89	11	0.124	61	7	0.115	0.139333
chr2	174438920	-	NM_022325	Ctsz	startC	17	3	0.176	25	4	0.16	19	3	0.158	0.164667
chr2	174438921	-	NM_022325	Ctsz	startC	17	3	0.176	24	4	0.167	19	2	0.105	0.149333
chr2	174438939	-	NM_022325	Ctsz	startC	11	2	0.182	20	3	0.15	0	0	0	#
chr2	174461176	-	NM_025983	Atp5e	3UTR	30	6	0.2	0	0	0	0	0	0	#
chr2	180589576	+	NM_031373	Ogfr	startC	12	3	0.25	14	2	0.143	15	2	0.133	0.175333
chr2	180589585	+	NM_031373	Ogfr	startC	12	3	0.25	15	4	0.267	14	2	0.143	0.22
chr2	5957814	+	NM_001081132	Upf2	CDS	0	0	0	17	6	0.353	0	0	0	#
chr2	22957094	-	NM_007380	Abi1	CDS	0	0	0	19	6	0.316	0	0	0	#
chr2	25223972	-	NM_146116	Tubb4b	CDS	0	0	0	22	7	0.318	0	0	0	#
chr2	25557898	+	ENSMUST00000015236	Edf1	startC	0	0	0	17	2	0.118	0	0	0	#
chr2	25557921	+	NM_021519	Edf1	startC	0	0	0	15	2	0.133	0	0	0	#
chr2	25561898	+	NM_021519	Edf1	stopC	0	0	0	44	10	0.227	47	10	0.217	#
chr2	26924487	-	NM_011512	Surf4	CDS	0	0	0	36	8	0.222	0	0	0	#
chr2	26933333	-	NM_011512	Surf4	startC	0	0	0	12	3	0.25	15	4	0.267	#
chr2	27762463	+	NM_011305	Rxra	3UTR	0	0	0	44	7	0.159	0	0	0	#
chr2	29802871	+	NM_011989	Slc27a4	5UTR	0	0	0	29	3	0.103	0	0	0	#
chr2	29815616	+	NM_011989	Slc27a4	stopC	0	0	0	33	6	0.182	0	0	0	#
chr2	30001132	+	NM_001177667	Sptan1	CDS	0	0	0	23	7	0.304	0	0	0	#
chr2	30149782	+	NM_146252	Tbc1d13	stopC	0	0	0	24	6	0.25	0	0	0	#
chr2	30415357	-	NM_007760	Crat	startC	0	0	0	13	2	0.154	0	0	0	#
chr2	31689340	+	NM_001112703	Abl1	5UTR	0	0	0	18	3	0.167	19	3	0.158	#
chr2	32303219	+	NM_133852	Golga2	CDS	0	0	0	35	9	0.257	0	0	0	#
chr2	32381724	-	NM_198001	1110008P14Rik	startC	0	0	0	17	3	0.176	0	0	0	#
chr2	32381726	-	NM_198001	1110008P14Rik	startC	0	0	0	16	3	0.188	10	2	0.2	#
chr2	36049215	-	NM_026703	Ndufa8	startC	0	0	0	15	3	0.2	16	2	0.125	#
chr2	39226194	-	NM_024209	Ppp6c	startC	0	0	0	10	2	0.2	0	0	0	#
chr2	51960579	-	NM_019401	Nmi	startC	0	0	0	18	3	0.167	0	0	0	#
chr2	52399619	-	NM_182994	Arl5a	3UTR	0	0	0	38	7	0.184	0	0	0	#
chr2	59699394	+	NM_198294	Tanc1	startC	0	0	0	18	3	0.167	0	0	0	#
chr2	62332187	-	NM_010074	Dpp4	3UTR	0	0	0	33	6	0.182	29	5	0.172	#
chr2	69749512	+	NM_001081086	Ppig	CDS	0	0	0	33	8	0.242	0	0	0	#
chr2	70754464	-	NM_172664	Tlk1	CDS	0	0	0	13	6	0.462	0	0	0	#
chr2	73911008	-	NM_175015	Atp5g3	startC	0	0	0	16	6	0.375	0	0	0	#
chr2	73911262	-	NM_175015	Atp5g3	5UTR	0	0	0	37	5	0.135	0	0	0	#
chr2	103776155	-	NM_016739	Caprin1	CDS	0	0	0	21	7	0.333	0	0	0	#
chr2	109917988	+	NM_172671	Lgr4	startC	0	0	0	20	3	0.15	0	0	0	#
chr2	112455237	+	NM_133749	Emc7	startC	0	0	0	15	2	0.133	12	2	0.167	#
chr2	119229644	-	NM_028104	Ppp1r14d	startC	0	0	0	10	1	0.1	0	0	0	#
chr2	119245534	+	NM_016907	Spint1	CDS	0	0	0	51	9	0.176	0	0	0	#
chr2	121360724	+	NM_009897	Ckmt1	CDS	0	0	0	66	14	0.212	0	0	0	#
chr2	121457191	+	NM_026318	Hypk	startC	0	0	0	13	2	0.154	0	0	0	#
chr2	122147785	+	NM_009735	B2m	startC	0	0	0	12	3	0.25	0	0	0	#
chr2	122151102	+	NM_009735	B2m	CDS	0	0	0	32	9	0.281	0	0	0	#
chr2	125740704	-	NM_177608	Secisbp2l	CDS	0	0	0	11	5	0.455	0	0	0	#
chr2	126742521	+	NM_019729	Usp8	CDS	0	0	0	15	7	0.467	0	0	0	#
chr2	143949701	-	NM_024281	Rrbp1	CDS	0	0	0	31	8	0.258	0	0	0	#
chr2	143954150	-	NM_024281	Rrbp1	CDS	0	0	0	71	11	0.157	67	13	0.194	#
chr2	143988462	-	NM_024281	Rrbp1	CDS	0	0	0	16	7	0.438	15	7	0.467	#
chr2	143988673	-	NM_024281	Rrbp1	CDS	0	0	0	45	9	0.2	0	0	0	#
chr2	143988929	-	NM_024281	Rrbp1	CDS	0	0	0	20	7	0.35	0	0	0	#
chr2	143989304	-	NM_024281	Rrbp1	CDS	0	0	0	38	8	0.211	0	0	0	#
chr2	144011108	-	NM_024281	Rrbp1	5UTR	0	0	0	17	2	0.118	0	0	0	#
chr2	150832950	-	NM_024465	Abhd12	stopC	0	0	0	15	5	0.333	0	0	0	#
chr2	151572693	+	NM_145535	Sdcbp2	5UTR	0	0	0	21	3	0.143	18	3	0.167	#
chr2	152111161	+	NM_029688	Srxn1	3UTR	0	0	0	58	11	0.19	0	0	0	#
chr2	152829863	-	NM_009743	Bcl2l1	startC	0	0	0	30	3	0.1	0	0	0	#
chr2	154657133	+	NM_029362	Chmp4b	startC	0	0	0	39	6	0.154	0	0	0	#
chr2	156172913	-	NM_133242	Rbm39	CDS	0	0	0	95	14	0.149	91	15	0.165	#
chr2	156778561	+	NM_172118	Myl9	startC	0	0	0	10	3	0.3	13	3	0.231	#
chr2	157325814	+	NM_019642	Rpn2	stopC	0	0	0	45	10	0.222	0	0	0	#
chr2	157325819	+	NM_019642	Rpn2	stopC	0	0	0	42	7	0.167	37	6	0.162	#
chr2	163570238	+	NM_008261	Hnf4a	stopC	0	0	0	27	6	0.222	0	0	0	#
chr2	163572146	+	NM_008261	Hnf4a	3UTR	0	0	0	19	5	0.263	16	4	0.25	#
chr2	163645062	-	NM_012032	Serinc3	startC	0	0	0	12	2	0.167	0	0	0	#
chr2	163727545	-	NM_007398	Ada	stopC	0	0	0	14	5	0.357	14	5	0.357	#
chr2	163750110	-	NM_007398	Ada	startC	0	0	0	16	2	0.125	0	0	0	#
chr2	163995308	+	NM_018753	Ywhab	5UTR	0	0	0	16	3	0.188	0	0	0	#
chr2	164011847	+	NM_018753	Ywhab	CDS	0	0	0	58	10	0.172	0	0	0	#
chr2	164425918	-	NM_011521	Sdc4	stopC	0	0	0	20	6	0.3	0	0	0	#
chr2	165277214	-	NM_144893	Slc35c2	stopC	0	0	0	28	6	0.214	0	0	0	#
chr2	167503494	+	NM_030743	Rnf114	startC	0	0	0	10	2	0.2	0	0	0	#
chr2	168634519	-	NM_015731	Atp9a	3UTR	0	0	0	18	6	0.333	12	4	0.333	#
chr2	174427745	-	NM_022325	Ctsz	stopC	0	0	0	59	9	0.153	47	8	0.17	#
chr2	174461175	-	NM_025983	Atp5e	3UTR	0	0	0	33	7	0.212	30	8	0.267	#
chr2	174461212	-	NM_025983	Atp5e	3UTR	0	0	0	15	4	0.267	0	0	0	#
chr2	174464023	-	NM_025983	Atp5e	startC	0	0	0	20	4	0.2	0	0	0	#
chr2	174465638	-	NM_025531	Slmo2	stopC	0	0	0	21	5	0.238	0	0	0	#
chr2	180689101	-	NM_011805	Dido1	CDS	0	0	0	82	11	0.136	0	0	0	#
chr2	5053122	-	NM_181848	Optn	CDS	0	0	0	0	0	0	32	10	0.312	#
chr2	20806594	+	NM_001081006	Etl4	CDS	0	0	0	0	0	0	76	11	0.145	#
chr2	23040011	-	NM_007380	Abi1	startC	0	0	0	0	0	0	10	2	0.222	#
chr2	23040053	-	NM_007380	Abi1	startC	0	0	0	0	0	0	23	4	0.174	#
chr2	25583926	-	NM_001024616	Rabl6	stopC	0	0	0	0	0	0	23	5	0.217	#
chr2	26921932	-	NM_011512	Surf4	stopC	0	0	0	0	0	0	97	12	0.124	#
chr2	26933357	-	NM_011512	Surf4	startC	0	0	0	0	0	0	17	2	0.118	#
chr2	26964196	-	NM_207234	Rexo4	startC	0	0	0	0	0	0	13	2	0.154	#
chr2	29802879	+	NM_011989	Slc27a4	5UTR	0	0	0	0	0	0	17	5	0.294	#
chr2	31689323	+	NM_001112703	Abl1	5UTR	0	0	0	0	0	0	15	2	0.133	#
chr2	32281760	-	NM_175190	Swi5	startC	0	0	0	0	0	0	10	1	0.1	#
chr2	34773291	+	NM_022310	Hspa5	CDS	0	0	0	0	0	0	10	5	0.5	#
chr2	39024251	-	NM_029793	Golga1	CDS	0	0	0	0	0	0	32	8	0.25	#
chr2	49246105	+	NM_029924	Mbd5	startC	0	0	0	0	0	0	10	1	0.1	#
chr2	62374377	-	NM_010074	Dpp4	CDS	0	0	0	0	0	0	12	5	0.417	#
chr2	68861612	+	NM_172856	Cers6	startC	0	0	0	0	0	0	14	3	0.214	#
chr2	73911287	-	NM_175015	Atp5g3	5UTR	0	0	0	0	0	0	19	2	0.105	#
chr2	83644674	+	NM_026934	Zc3h15	startC	0	0	0	0	0	0	18	2	0.111	#
chr2	109917976	+	NM_172671	Lgr4	startC	0	0	0	0	0	0	16	3	0.188	#
chr2	109917985	+	NM_172671	Lgr4	startC	0	0	0	0	0	0	16	3	0.188	#
chr2	118622179	+	NM_009773	Bub1b	CDS	0	0	0	0	0	0	39	9	0.231	#
chr2	121357781	+	ENSMUST00000078222	Ckmt1	5UTR	0	0	0	0	0	0	11	2	0.182	#
chr2	121357944	+	ENSMUST00000125221	Ckmt1	5UTR	0	0	0	0	0	0	17	3	0.188	#
chr2	121450733	+	NM_011354	Serf2	stopC	0	0	0	0	0	0	70	9	0.129	#
chr2	122147780	+	NM_009735	B2m	startC	0	0	0	0	0	0	10	1	0.1	#
chr2	122702457	-	NM_011774	Slc30a4	startC	0	0	0	0	0	0	16	2	0.125	#
chr2	127068897	+	NM_175550	Ap4e1	3UTR	0	0	0	0	0	0	14	5	0.357	#
chr2	143956805	-	NM_024281	Rrbp1	CDS	0	0	0	0	0	0	17	7	0.412	#
chr2	144011143	-	NM_024281	Rrbp1	5UTR	0	0	0	0	0	0	11	2	0.182	#
chr2	151572673	+	NM_145535	Sdcbp2	5UTR	0	0	0	0	0	0	17	3	0.176	#
chr2	152829887	-	NM_009743	Bcl2l1	startC	0	0	0	0	0	0	37	5	0.135	#
chr2	153741393	+	NM_007896	Mapre1	5UTR	0	0	0	0	0	0	10	2	0.2	#
chr2	155225906	+	NM_008395	Itch	3UTR	0	0	0	0	0	0	30	7	0.233	#
chr2	155225930	+	NM_008395	Itch	3UTR	0	0	0	0	0	0	28	5	0.179	#
chr2	156179903	-	NM_133242	Rbm39	5UTR	0	0	0	0	0	0	10	2	0.2	#
chr2	156312265	-	NM_020255	Scand1	startC	0	0	0	0	0	0	10	2	0.2	#
chr2	157295293	+	NM_019642	Rpn2	CDS	0	0	0	0	0	0	32	10	0.312	#
chr2	157470776	+	NM_009271	Src	3UTR	0	0	0	0	0	0	17	4	0.235	#
chr2	160720950	+	NM_009408	Top1	CDS	0	0	0	0	0	0	40	8	0.2	#
chr2	163570868	+	NM_008261	Hnf4a	3UTR	0	0	0	0	0	0	38	6	0.158	#
chr2	163636936	-	NM_012032	Serinc3	CDS	0	0	0	0	0	0	23	10	0.435	#
chr2	163750168	-	NM_007398	Ada	startC	0	0	0	0	0	0	12	2	0.167	#
chr2	167482943	-	NM_170756	Spata2	3UTR	0	0	0	0	0	0	14	4	0.286	#
chr2	174438912	-	NM_022325	Ctsz	startC	0	0	0	0	0	0	19	3	0.158	#
chr3	3634254	+	ENSMUST00000108394	Hnf4g	startC	32	4	0.125	0	0	0	29	3	0.103	#
chr3	3658881	+	NM_013920	Hnf4g	3UTR	49	8	0.167	54	10	0.189	44	6	0.136	0.164
chr3	8953692	-	NM_009412	Tpd52	CDS	34	10	0.294	0	0	0	0	0	0	#
chr3	9004424	-	NM_009412	Tpd52	startC	10	2	0.2	11	2	0.182	0	0	0	#
chr3	14863571	+	NM_007606	Car3	startC	17	2	0.118	18	2	0.111	18	4	0.222	0.150333
chr3	14863589	+	NM_007606	Car3	startC	12	2	0.167	13	4	0.308	12	2	0.167	0.214
chr3	14886466	+	NM_009801	Car2	5UTR	16	2	0.125	15	2	0.133	11	2	0.182	0.146667
chr3	16183292	+	NM_172677	Ythdf3	5UTR	12	3	0.25	0	0	0	0	0	0	#
chr3	16183309	+	NM_172677	Ythdf3	startC	10	1	0.1	0	0	0	0	0	0	#
chr3	31097500	+	NM_011386	Skil	startC	12	3	0.25	17	2	0.118	16	2	0.125	0.164333
chr3	31118506	+	NM_011386	Skil	stopC	20	5	0.25	0	0	0	0	0	0	#
chr3	31118578	+	NM_011386	Skil	stopC	31	9	0.29	37	9	0.243	33	6	0.182	0.238333
chr3	35754239	+	NM_029570	Atp11b	startC	13	2	0.154	0	0	0	0	0	0	#
chr3	37052493	+	NM_172679	4932438A13Rik	stopC	28	6	0.214	0	0	0	0	0	0	#
chr3	40839485	-	NM_028140	Mfsd8	CDS	13	5	0.385	13	6	0.462	0	0	0	#
chr3	75886290	-	NM_175193	Golim4	CDS	33	8	0.242	0	0	0	0	0	0	#
chr3	86138047	-	NM_016959	Rps3a1	stopC	17	5	0.294	0	0	0	0	0	0	#
chr3	87617782	+	ENSMUST00000039476	Arhgef11	5UTR	11	4	0.364	13	3	0.231	11	3	0.273	0.289333
chr3	87885293	-	NM_033573	Prcc	startC	18	4	0.222	17	2	0.118	14	2	0.143	0.161
chr3	88155797	+	NM_133665	Mef2d	startC	10	2	0.2	0	0	0	0	0	0	#
chr3	88313287	+	NM_009836	Cct3	CDS	34	8	0.235	0	0	0	0	0	0	#
chr3	88425064	-	NM_178696	Slc25a44	5UTR	10	1	0.1	0	0	0	0	0	0	#
chr3	88425070	-	NM_178696	Slc25a44	5UTR	10	2	0.2	11	2	0.182	16	3	0.188	0.19
chr3	88486599	-	NM_019390	Lmna	CDS	31	8	0.258	0	0	0	0	0	0	#
chr3	89378878	-	NM_009565	Zbtb7b	3UTR	18	5	0.278	0	0	0	0	0	0	#
chr3	89378884	-	NM_009565	Zbtb7b	3UTR	17	5	0.294	0	0	0	0	0	0	#
chr3	89459446	+	NM_026784	Pmvk	startC	18	6	0.333	14	3	0.214	13	3	0.231	0.259333
chr3	90079765	+	NM_001253738	Tpm3	startC	28	3	0.107	39	5	0.128	28	3	0.111	0.115333
chr3	90079828	+	NM_001253738	Tpm3	startC	17	2	0.118	18	3	0.167	14	2	0.143	0.142667
chr3	90212747	-	NM_027015	Rps27	stopC	12	5	0.417	0	0	0	0	0	0	#
chr3	90248213	+	NM_013901	Slc39a1	5UTR	10	3	0.3	0	0	0	0	0	0	#
chr3	90248215	+	NM_013901	Slc39a1	5UTR	10	2	0.2	13	2	0.154	13	2	0.154	0.169333
chr3	90248221	+	NM_013901	Slc39a1	5UTR	14	2	0.143	15	2	0.133	19	4	0.211	0.162333
chr3	90248234	+	NM_013901	Slc39a1	5UTR	13	2	0.154	16	2	0.125	0	0	0	#
chr3	93561053	+	NM_009112	S100a10	startC	10	2	0.2	0	0	0	0	0	0	#
chr3	93564380	+	NM_009112	S100a10	stopC	44	8	0.182	51	9	0.176	43	7	0.163	0.173667
chr3	95012332	-	NM_030074	Zfp687	startC	10	1	0.1	14	2	0.143	10	2	0.2	0.147667
chr3	95042554	-	NM_008951	Psmd4	startC	16	3	0.188	0	0	0	0	0	0	#
chr3	95106532	-	NM_008847	Pip5k1a	startC	18	3	0.167	0	0	0	0	0	0	#
chr3	95625151	+	NM_019561	Ensa	startC	17	2	0.118	17	3	0.176	15	2	0.133	0.142333
chr3	95628949	+	NM_001026212	Ensa	3UTR	30	6	0.2	0	0	0	0	0	0	#
chr3	95628950	+	NM_001026212	Ensa	3UTR	29	5	0.172	0	0	0	0	0	0	#
chr3	95945229	+	NM_023210	Anp32e	stopC	26	7	0.269	34	10	0.294	0	0	0	#
chr3	96269793	+	NM_175666	Hist2h2bb	startC	28	4	0.143	0	0	0	0	0	0	#
chr3	96269795	+	NM_175666	Hist2h2bb	startC	35	4	0.114	0	0	0	0	0	0	#
chr3	96850355	+	NM_021517	Pdzk1	startC	11	2	0.182	0	0	0	0	0	0	#
chr3	96850369	+	NM_021517	Pdzk1	startC	12	2	0.167	17	3	0.176	0	0	0	#
chr3	96850374	+	NM_021517	Pdzk1	startC	10	2	0.2	18	4	0.222	10	3	0.3	0.240667
chr3	96850376	+	NM_021517	Pdzk1	startC	10	1	0.1	19	2	0.105	0	0	0	#
chr3	96871196	-	NM_026229	Gpr89	stopC	23	6	0.261	0	0	0	30	6	0.2	#
chr3	97901324	+	NM_011342	Sec22b	startC	17	5	0.294	19	4	0.211	22	3	0.136	0.213667
chr3	97901329	+	NM_011342	Sec22b	startC	16	2	0.125	19	2	0.105	23	3	0.13	0.12
chr3	97901331	+	NM_011342	Sec22b	startC	17	2	0.118	0	0	0	0	0	0	#
chr3	101576541	-	NM_144900	Atp1a1	stopC	10	4	0.4	0	0	0	11	4	0.364	#
chr3	101583822	-	NM_144900	Atp1a1	CDS	66	10	0.152	71	12	0.169	0	0	0	#
chr3	101586886	-	NM_144900	Atp1a1	CDS	95	13	0.137	106	23	0.217	115	19	0.165	0.173
chr3	101589909	-	NM_144900	Atp1a1	CDS	54	10	0.185	58	10	0.172	0	0	0	#
chr3	101591408	-	NM_144900	Atp1a1	CDS	95	20	0.211	113	31	0.274	110	25	0.227	0.237333
chr3	101591415	-	NM_144900	Atp1a1	CDS	92	12	0.13	113	22	0.195	99	19	0.192	0.172333
chr3	101604429	-	NM_144900	Atp1a1	startC	33	5	0.152	40	4	0.1	35	4	0.114	0.122
chr3	101604430	-	NM_144900	Atp1a1	startC	28	4	0.143	0	0	0	0	0	0	#
chr3	101604442	-	NM_144900	Atp1a1	startC	19	3	0.158	23	3	0.13	22	4	0.182	0.156667
chr3	105943729	-	NM_009725	Atp5f1	CDS	113	14	0.124	127	17	0.134	113	15	0.133	0.130333
chr3	106539353	-	NM_133869	Cept1	startC	13	2	0.154	0	0	0	0	0	0	#
chr3	107696355	-	NM_145542	Ahcyl1	startC	15	2	0.133	0	0	0	0	0	0	#
chr3	107696362	-	NM_145542	Ahcyl1	startC	19	3	0.158	0	0	0	0	0	0	#
chr3	107696410	-	NM_145542	Ahcyl1	startC	12	2	0.167	11	3	0.273	10	2	0.2	0.213333
chr3	107696421	-	NM_145542	Ahcyl1	startC	15	4	0.267	14	3	0.214	15	2	0.133	0.204667
chr3	107696436	-	NM_145542	Ahcyl1	startC	13	2	0.154	14	3	0.214	16	2	0.125	0.164333
chr3	108445013	-	NM_011319	Sars	startC	23	4	0.174	28	3	0.107	21	3	0.143	0.141333
chr3	108904414	-	NM_025845	Prpf38b	CDS	80	15	0.188	95	15	0.158	81	11	0.136	0.160667
chr3	109166456	+	NM_172685	Slc25a24	stopC	23	6	0.261	0	0	0	0	0	0	#
chr3	116712337	-	ENSMUST00000029569	Slc35a3	5UTR	14	2	0.143	19	2	0.105	16	2	0.125	0.124333
chr3	118562255	+	NM_170778	Dpyd	startC	25	6	0.24	27	4	0.148	0	0	0	#
chr3	118562262	+	NM_170778	Dpyd	startC	18	4	0.222	25	4	0.16	19	4	0.211	0.197667
chr3	122895424	+	NM_007980	Fabp2	startC	288	39	0.137	344	50	0.147	315	38	0.122	0.135333
chr3	122895454	+	NM_007980	Fabp2	startC	197	26	0.132	237	26	0.11	203	26	0.128	0.123333
chr3	122898706	+	NM_007980	Fabp2	CDS	45	9	0.2	0	0	0	0	0	0	#
chr3	122898778	+	NM_007980	Fabp2	CDS	42	8	0.19	0	0	0	0	0	0	#
chr3	129321487	-	NM_007934	Enpep	CDS	12	5	0.417	0	0	0	12	5	0.417	#
chr3	129332339	-	NM_007934	Enpep	startC	13	3	0.231	16	5	0.312	12	4	0.333	0.292
chr3	129332471	-	NM_007934	Enpep	startC	21	4	0.19	0	0	0	0	0	0	#
chr3	129332492	-	NM_007934	Enpep	startC	21	6	0.286	20	2	0.1	19	2	0.105	0.163667
chr3	129332571	-	NM_007934	Enpep	startC	10	2	0.2	0	0	0	0	0	0	#
chr3	131234205	-	NM_008212	Hadh	stopC	46	7	0.152	61	9	0.148	0	0	0	#
chr3	132673976	-	NM_007926	Aimp1	CDS	60	16	0.267	66	17	0.258	62	13	0.21	0.245
chr3	132839576	+	NM_001163455	Tbck	3UTR	95	14	0.147	0	0	0	0	0	0	#
chr3	135438831	+	NM_025356	Ube2d3	5UTR	10	2	0.2	0	0	0	0	0	0	#
chr3	135438842	+	NM_025356	Ube2d3	5UTR	10	2	0.2	0	0	0	0	0	0	#
chr3	135438856	+	NM_025356	Ube2d3	5UTR	20	5	0.25	23	4	0.174	19	2	0.105	0.176333
chr3	135439645	+	NM_025356	Ube2d3	startC	20	6	0.3	31	8	0.258	25	6	0.24	0.266
chr3	136670277	+	NM_008913	Ppp3ca	5UTR	44	16	0.364	47	10	0.213	46	10	0.217	0.264667
chr3	136670278	+	NM_008913	Ppp3ca	5UTR	44	5	0.114	48	9	0.188	48	8	0.167	0.156333
chr3	136670281	+	NM_008913	Ppp3ca	5UTR	45	11	0.244	46	8	0.174	49	6	0.122	0.18
chr3	136670287	+	NM_008913	Ppp3ca	5UTR	45	5	0.111	0	0	0	0	0	0	#
chr3	138089914	-	NM_008642	Mttp	3UTR	24	6	0.25	0	0	0	0	0	0	#
chr3	138277695	+	NM_007409	Adh1	startC	12	2	0.167	13	3	0.231	10	3	0.3	0.232667
chr3	138277699	+	NM_007409	Adh1	startC	14	3	0.214	16	2	0.125	11	2	0.182	0.173667
chr3	138277711	+	NM_007409	Adh1	startC	14	2	0.143	17	2	0.118	12	2	0.167	0.142667
chr3	138460476	-	NM_175224	Metap1	stopC	30	6	0.2	0	0	0	0	0	0	#
chr3	142570934	+	NM_018734	Gbp3	CDS	21	8	0.381	0	0	0	0	0	0	#
chr3	144915617	-	NM_001033199	Clca4b	CDS	39	8	0.205	0	0	0	0	0	0	#
chr3	145004734	-	NM_017474	Clca1	stopC	22	7	0.318	17	5	0.294	17	5	0.294	0.302
chr3	145005918	-	NM_017474	Clca1	CDS	33	9	0.273	0	0	0	30	8	0.267	#
chr3	145024600	-	NM_017474	Clca1	CDS	11	7	0.636	11	5	0.455	0	0	0	#
chr3	152094117	-	NM_016867	Gipc2	stopC	18	5	0.278	0	0	0	0	0	0	#
chr3	152165875	-	NM_016867	Gipc2	startC	33	4	0.121	47	8	0.17	41	10	0.244	0.178333
chr3	152165881	-	NM_016867	Gipc2	startC	29	4	0.138	0	0	0	0	0	0	#
chr3	152247140	-	NM_199465	Nexn	CDS	17	7	0.412	20	6	0.316	0	0	0	#
chr3	157947589	+	NM_001013806	Ankrd13c	startC	20	5	0.25	14	4	0.286	10	4	0.4	0.312
chr3	157947593	+	NM_001013806	Ankrd13c	startC	19	3	0.158	14	3	0.214	10	2	0.2	0.190667
chr3	157947599	+	NM_001013806	Ankrd13c	startC	18	5	0.278	14	3	0.214	10	2	0.2	0.230667
chr3	30818893	+	NM_027016	Sec62	stopC	0	0	0	66	9	0.136	0	0	0	#
chr3	30903751	-	NM_153421	Phc3	3UTR	0	0	0	14	4	0.286	0	0	0	#
chr3	88486594	-	NM_019390	Lmna	CDS	0	0	0	35	9	0.257	28	8	0.286	#
chr3	88588136	+	NM_025448	Ssr2	stopC	0	0	0	22	8	0.364	18	7	0.389	#
chr3	89393049	-	NM_009565	Zbtb7b	5UTR	0	0	0	20	2	0.1	18	2	0.111	#
chr3	90248227	+	NM_013901	Slc39a1	5UTR	0	0	0	16	2	0.125	0	0	0	#
chr3	90393235	-	NM_145540	Ints3	CDS	0	0	0	24	9	0.375	22	7	0.318	#
chr3	95322713	+	NM_029789	Cers2	stopC	0	0	0	10	4	0.4	0	0	0	#
chr3	95662770	+	NM_008562	Mcl1	3UTR	0	0	0	22	7	0.318	19	7	0.368	#
chr3	96850377	+	NM_021517	Pdzk1	startC	0	0	0	17	3	0.176	0	0	0	#
chr3	97901314	+	NM_011342	Sec22b	startC	0	0	0	17	2	0.118	0	0	0	#
chr3	101586130	-	NM_144900	Atp1a1	CDS	0	0	0	37	8	0.216	0	0	0	#
chr3	106539332	-	NM_133869	Cept1	startC	0	0	0	21	3	0.143	0	0	0	#
chr3	107696411	-	NM_145542	Ahcyl1	startC	0	0	0	12	2	0.167	0	0	0	#
chr3	108903982	-	NM_025845	Prpf38b	stopC	0	0	0	45	9	0.2	0	0	0	#
chr3	122895427	+	NM_007980	Fabp2	startC	0	0	0	388	38	0.1	0	0	0	#
chr3	123117178	-	NM_080451	Synpo2	CDS	0	0	0	14	6	0.429	0	0	0	#
chr3	129270352	-	NM_007934	Enpep	stopC	0	0	0	53	10	0.192	48	11	0.234	#
chr3	129332379	-	NM_007934	Enpep	startC	0	0	0	31	5	0.161	0	0	0	#
chr3	132839533	+	NM_001163455	Tbck	3UTR	0	0	0	55	8	0.145	0	0	0	#
chr3	135438854	+	NM_025356	Ube2d3	5UTR	0	0	0	25	5	0.2	19	3	0.158	#
chr3	135439654	+	NM_025356	Ube2d3	startC	0	0	0	30	3	0.1	0	0	0	#
chr3	135439664	+	NM_025356	Ube2d3	startC	0	0	0	31	6	0.194	0	0	0	#
chr3	138090646	-	NM_008642	Mttp	3UTR	0	0	0	15	4	0.267	0	0	0	#
chr3	138092672	-	NM_008642	Mttp	CDS	0	0	0	33	9	0.273	0	0	0	#
chr3	138115241	-	NM_008642	Mttp	CDS	0	0	0	30	8	0.267	32	9	0.29	#
chr3	138460469	-	NM_175224	Metap1	stopC	0	0	0	29	6	0.207	0	0	0	#
chr3	138460482	-	NM_175224	Metap1	stopC	0	0	0	26	7	0.269	0	0	0	#
chr3	144968350	-	NM_207208	Clca4a	CDS	0	0	0	52	11	0.212	0	0	0	#
chr3	145005909	-	NM_017474	Clca1	CDS	0	0	0	30	8	0.267	0	0	0	#
chr3	145032601	-	NM_017474	Clca1	startC	0	0	0	22	3	0.136	16	2	0.125	#
chr3	14863595	+	NM_007606	Car3	startC	0	0	0	0	0	0	10	2	0.2	#
chr3	31118569	+	NM_011386	Skil	stopC	0	0	0	0	0	0	34	7	0.206	#
chr3	87537014	+	NM_012051	Etv3	3UTR	0	0	0	0	0	0	18	5	0.278	#
chr3	87617786	+	ENSMUST00000039476	Arhgef11	5UTR	0	0	0	0	0	0	13	2	0.154	#
chr3	88313247	+	NM_009836	Cct3	CDS	0	0	0	0	0	0	11	5	0.455	#
chr3	88425080	-	NM_178696	Slc25a44	5UTR	0	0	0	0	0	0	16	4	0.25	#
chr3	88647827	+	NM_008487	Arhgef2	3UTR	0	0	0	0	0	0	28	5	0.179	#
chr3	89378879	-	NM_009565	Zbtb7b	3UTR	0	0	0	0	0	0	26	5	0.192	#
chr3	89393048	-	NM_009565	Zbtb7b	5UTR	0	0	0	0	0	0	18	3	0.167	#
chr3	89459454	+	NM_026784	Pmvk	startC	0	0	0	0	0	0	10	3	0.3	#
chr3	90086542	+	NM_022314	Tpm3	CDS	0	0	0	0	0	0	56	10	0.179	#
chr3	94779888	-	NM_001037711	Cgn	startC	0	0	0	0	0	0	13	2	0.154	#
chr3	95625161	+	NM_019561	Ensa	startC	0	0	0	0	0	0	14	2	0.143	#
chr3	96850382	+	NM_021517	Pdzk1	startC	0	0	0	0	0	0	10	1	0.1	#
chr3	96850412	+	NM_021517	Pdzk1	startC	0	0	0	0	0	0	15	3	0.2	#
chr3	96871185	-	NM_026229	Gpr89	3UTR	0	0	0	0	0	0	28	5	0.179	#
chr3	101576340	-	NM_144900	Atp1a1	3UTR	0	0	0	0	0	0	26	5	0.192	#
chr3	101576349	-	NM_144900	Atp1a1	3UTR	0	0	0	0	0	0	28	5	0.179	#
chr3	107696344	-	NM_145542	Ahcyl1	startC	0	0	0	0	0	0	10	1	0.1	#
chr3	129332357	-	NM_007934	Enpep	startC	0	0	0	0	0	0	18	2	0.111	#
chr3	135438859	+	NM_025356	Ube2d3	5UTR	0	0	0	0	0	0	19	4	0.211	#
chr3	138109142	-	NM_008642	Mttp	CDS	0	0	0	0	0	0	57	12	0.211	#
chr3	144596912	+	NM_053102	Sep15	stopC	0	0	0	0	0	0	28	7	0.25	#
chr3	144844571	-	NM_139148	Clca3b	CDS	0	0	0	0	0	0	84	13	0.155	#
chr3	152361960	+	NM_133247	Usp33	CDS	0	0	0	0	0	0	37	11	0.297	#
chr4	3973552	-	ENSMUST00000089430	Gm11808	startC	16	5	0.312	24	3	0.125	19	3	0.158	0.198333
chr4	3973567	-	ENSMUST00000089430	Gm11808	startC	16	4	0.25	24	8	0.333	21	6	0.286	0.289667
chr4	11784726	+	NM_019753	Cdh17	CDS	13	5	0.385	0	0	0	0	0	0	#
chr4	31964343	+	NM_009316	Map3k7	startC	15	3	0.2	10	2	0.2	12	2	0.167	0.189
chr4	32983591	+	NM_027491	Rragd	startC	11	3	0.273	14	2	0.143	0	0	0	#
chr4	40279271	-	NM_001033305	Ndufb6	startC	20	2	0.105	0	0	0	0	0	0	#
chr4	40279277	-	NM_001033305	Ndufb6	startC	21	3	0.143	0	0	0	0	0	0	#
chr4	40947880	-	NM_009736	Bag1	CDS	53	9	0.17	0	0	0	0	0	0	#
chr4	40948012	-	NM_009736	Bag1	startC	10	2	0.2	14	3	0.214	12	2	0.167	0.193667
chr4	43519480	-	NM_009416	Tpm2	CDS	43	9	0.209	0	0	0	40	8	0.2	#
chr4	43523243	-	NM_009416	Tpm2	startC	28	6	0.214	0	0	0	0	0	0	#
chr4	43523275	-	NM_009416	Tpm2	startC	40	5	0.125	50	9	0.18	48	5	0.104	0.136333
chr4	43523280	-	NM_009416	Tpm2	startC	40	7	0.175	52	7	0.135	48	6	0.125	0.145
chr4	45107997	-	NM_001099675	Tomm5	startC	10	1	0.1	17	2	0.118	0	0	0	#
chr4	45804328	+	NM_028270	Aldh1b1	3UTR	16	4	0.25	12	4	0.333	19	5	0.263	0.282
chr4	49536545	-	NM_144903	Aldob	3UTR	118	19	0.161	142	18	0.127	127	14	0.11	0.132667
chr4	49541222	-	NM_144903	Aldob	CDS	130	20	0.154	164	22	0.134	119	14	0.118	0.135333
chr4	49541226	-	NM_144903	Aldob	CDS	131	18	0.138	166	24	0.145	127	15	0.119	0.134
chr4	49544843	-	NM_144903	Aldob	startC	15	2	0.133	20	2	0.1	0	0	0	#
chr4	49544859	-	NM_144903	Aldob	startC	20	4	0.2	27	7	0.259	22	4	0.182	0.213667
chr4	49544863	-	NM_144903	Aldob	startC	20	2	0.1	26	5	0.192	20	3	0.15	0.147333
chr4	53860695	+	NM_028053	Tmem38b	3UTR	13	5	0.385	22	12	0.545	18	10	0.556	0.495333
chr4	53860697	+	NM_028053	Tmem38b	3UTR	15	7	0.467	23	12	0.522	17	10	0.588	0.525667
chr4	53860703	+	NM_028053	Tmem38b	3UTR	37	12	0.324	50	15	0.3	40	13	0.325	0.316333
chr4	53860708	+	NM_028053	Tmem38b	3UTR	51	24	0.471	66	32	0.485	49	20	0.408	0.454667
chr4	53860714	+	NM_028053	Tmem38b	3UTR	66	41	0.621	82	51	0.622	67	38	0.567	0.603333
chr4	53860718	+	NM_028053	Tmem38b	3UTR	70	45	0.643	88	54	0.614	70	42	0.6	0.619
chr4	53860719	+	NM_028053	Tmem38b	3UTR	70	48	0.686	85	55	0.647	68	43	0.632	0.655
chr4	53860729	+	NM_028053	Tmem38b	3UTR	54	42	0.778	64	47	0.734	55	37	0.673	0.728333
chr4	53860742	+	NM_028053	Tmem38b	3UTR	46	45	0.978	55	53	0.964	41	36	0.878	0.94
chr4	53860743	+	NM_028053	Tmem38b	3UTR	45	41	0.911	54	47	0.887	42	35	0.833	0.877
chr4	53860745	+	NM_028053	Tmem38b	3UTR	41	38	0.927	50	46	0.939	41	33	0.805	0.890333
chr4	53860746	+	NM_028053	Tmem38b	3UTR	43	41	0.953	48	46	0.958	41	35	0.854	0.921667
chr4	53860755	+	NM_028053	Tmem38b	3UTR	42	40	0.976	50	47	0.94	33	30	0.909	0.941667
chr4	53860756	+	NM_028053	Tmem38b	3UTR	40	39	0.975	51	47	0.922	35	31	0.886	0.927667
chr4	53860762	+	NM_028053	Tmem38b	3UTR	40	39	0.975	45	43	0.956	34	32	0.941	0.957333
chr4	53860769	+	NM_028053	Tmem38b	3UTR	34	33	0.971	41	39	0.951	31	28	0.903	0.941667
chr4	55532334	-	NM_010637	Klf4	5UTR	12	2	0.167	14	4	0.286	10	3	0.3	0.251
chr4	55532338	-	NM_010637	Klf4	5UTR	11	2	0.182	0	0	0	0	0	0	#
chr4	56800010	-	NM_026079	Ikbkap	startC	13	2	0.154	0	0	0	10	1	0.1	#
chr4	57956230	-	NM_011660	Txn1	startC	20	4	0.2	26	4	0.154	30	5	0.167	0.173667
chr4	57956232	-	NM_011660	Txn1	startC	21	3	0.143	27	3	0.111	30	3	0.1	0.118
chr4	57956256	-	NM_011660	Txn1	startC	19	4	0.211	18	2	0.111	18	4	0.222	0.181333
chr4	57956266	-	NM_011660	Txn1	startC	10	3	0.3	12	2	0.167	11	2	0.182	0.216333
chr4	59189337	+	ENSMUST00000030074	Ugcg	5UTR	11	3	0.273	0	0	0	0	0	0	#
chr4	62523977	-	NM_021498	Pole3	stopC	20	6	0.3	33	9	0.273	0	0	0	#
chr4	82505015	-	NM_008687	Nfib	5UTR	13	3	0.231	10	3	0.3	10	2	0.2	0.243667
chr4	82505024	-	NM_008687	Nfib	5UTR	10	1	0.1	0	0	0	0	0	0	#
chr4	82505680	-	NM_008687	Nfib	5UTR	11	2	0.182	17	2	0.118	14	2	0.143	0.147667
chr4	95967486	+	NM_030014	Hook1	startC	16	4	0.25	21	2	0.1	19	5	0.263	0.204333
chr4	105157436	+	NM_080555	Ppap2b	5UTR	11	3	0.273	0	0	0	0	0	0	#
chr4	115738695	+	NM_172698	Efcab14	startC	11	2	0.182	0	0	0	0	0	0	#
chr4	116639101	-	NM_021473	Akr1a1	CDS	13	5	0.385	15	6	0.4	12	7	0.583	0.456
chr4	116645542	-	NM_021473	Akr1a1	startC	19	2	0.105	0	0	0	0	0	0	#
chr4	116645544	-	NM_021473	Akr1a1	startC	19	2	0.105	21	4	0.19	15	2	0.133	0.142667
chr4	116645545	-	NM_021473	Akr1a1	startC	18	3	0.167	0	0	0	0	0	0	#
chr4	118291193	-	NM_011213	Ptprf	5UTR	15	3	0.2	0	0	0	0	0	0	#
chr4	118291200	-	NM_011213	Ptprf	5UTR	22	5	0.227	0	0	0	21	4	0.19	#
chr4	118291220	-	NM_011213	Ptprf	5UTR	20	3	0.15	18	4	0.222	0	0	0	#
chr4	118291229	-	NM_011213	Ptprf	5UTR	17	3	0.176	16	3	0.188	10	2	0.2	0.188
chr4	119294420	-	NM_011732	Ybx1	startC	12	2	0.167	0	0	0	0	0	0	#
chr4	119294432	-	NM_011732	Ybx1	startC	13	2	0.154	14	2	0.143	11	2	0.182	0.159667
chr4	119294436	-	NM_011732	Ybx1	startC	13	3	0.231	15	2	0.133	13	2	0.154	0.172667
chr4	119294444	-	NM_011732	Ybx1	startC	10	2	0.2	0	0	0	0	0	0	#
chr4	119658823	-	NM_008191	Guca2b	startC	29	6	0.214	30	4	0.133	29	4	0.148	0.165
chr4	122862924	-	NM_007598	Cap1	CDS	44	9	0.205	50	9	0.18	0	0	0	#
chr4	122872435	-	NM_007598	Cap1	startC	18	2	0.111	22	3	0.136	17	2	0.118	0.121667
chr4	123664720	-	uc008upq.1	Macf1	startC	12	2	0.167	16	3	0.188	11	3	0.273	0.209333
chr4	127026782	+	NM_023603	Sfpq	CDS	108	12	0.112	118	21	0.179	107	16	0.15	0.147
chr4	128993372	+	NM_016895	Ak2	startC	10	2	0.2	0	0	0	0	0	0	#
chr4	129010848	+	NM_016895	Ak2	3UTR	43	10	0.233	54	7	0.13	0	0	0	#
chr4	129011109	+	NM_016895	Ak2	3UTR	21	5	0.238	0	0	0	0	0	0	#
chr4	129105621	+	NM_025452	Tmem54	startC	11	3	0.273	11	3	0.273	10	1	0.1	0.215333
chr4	129105631	+	NM_025452	Tmem54	startC	11	2	0.182	0	0	0	0	0	0	#
chr4	129105676	+	NM_025452	Tmem54	startC	23	7	0.304	27	5	0.185	19	2	0.105	0.198
chr4	129105679	+	NM_025452	Tmem54	startC	22	3	0.136	26	3	0.115	18	4	0.222	0.157667
chr4	129820380	+	ENSMUST00000030578	Ptp4a2	5UTR	10	1	0.1	15	3	0.2	16	3	0.188	0.162667
chr4	129820385	+	ENSMUST00000030578	Ptp4a2	5UTR	11	2	0.182	16	2	0.125	15	2	0.133	0.146667
chr4	129820432	+	ENSMUST00000030578	Ptp4a2	5UTR	12	2	0.167	19	3	0.158	11	2	0.182	0.169
chr4	130663406	+	NM_030722	Pum1	5UTR	20	2	0.105	16	3	0.188	16	2	0.125	0.139333
chr4	130663412	+	NM_030722	Pum1	5UTR	19	6	0.316	0	0	0	0	0	0	#
chr4	130663414	+	NM_030722	Pum1	5UTR	19	3	0.158	17	2	0.118	16	2	0.125	0.133667
chr4	130663422	+	NM_030722	Pum1	5UTR	16	3	0.188	18	3	0.167	17	3	0.176	0.177
chr4	131924367	-	NM_183428	Epb4.1	3UTR	10	4	0.4	0	0	0	0	0	0	#
chr4	132533337	-	NM_007512	Atpif1	CDS	81	16	0.198	98	20	0.204	73	14	0.192	0.198
chr4	132757102	-	NM_133888	Smpdl3b	startC	14	2	0.143	0	0	0	0	0	0	#
chr4	132757103	-	NM_133888	Smpdl3b	startC	14	2	0.143	0	0	0	0	0	0	#
chr4	132757104	-	NM_133888	Smpdl3b	startC	14	3	0.214	13	4	0.308	15	2	0.133	0.218333
chr4	133130639	+	NM_153423	Wasf2	5UTR	14	4	0.286	10	2	0.2	13	5	0.385	0.290333
chr4	133535768	-	NM_010948	Nudc	CDS	11	5	0.455	0	0	0	0	0	0	#
chr4	134000767	-	NM_026144	Dhdds	5UTR	10	2	0.2	0	0	0	0	0	0	#
chr4	134924119	+	NM_023665	Rsrp1	startC	13	3	0.231	0	0	0	0	0	0	#
chr4	135872960	-	NM_026383	Pnrc2	5UTR	16	2	0.125	17	2	0.118	16	4	0.25	0.164333
chr4	136248105	+	NM_011542	Tcea3	startC	28	3	0.107	31	4	0.129	29	5	0.172	0.136
chr4	137328754	-	NM_009861	Cdc42	CDS	14	6	0.429	18	6	0.333	0	0	0	#
chr4	138223592	+	NM_010470	Hp1bp3	CDS	63	13	0.206	72	15	0.208	50	13	0.26	0.224667
chr4	138455251	+	NM_025451	Camk2n1	startC	16	4	0.25	17	7	0.412	18	4	0.222	0.294667
chr4	138455257	+	NM_025451	Camk2n1	startC	16	2	0.125	18	3	0.167	18	2	0.111	0.134333
chr4	138455267	+	NM_025451	Camk2n1	startC	15	2	0.133	18	2	0.111	18	2	0.111	0.118333
chr4	139131006	-	NM_001163006	Minos1	startC	10	2	0.2	15	2	0.133	16	3	0.188	0.173667
chr4	139131017	-	NM_001163006	Minos1	startC	12	3	0.25	13	3	0.231	11	2	0.182	0.221
chr4	139291473	+	NM_009798	Capzb	3UTR	13	4	0.308	0	0	0	12	4	0.333	#
chr4	139482535	+	NM_001160319	Ubr4	CDS	19	6	0.316	0	0	0	0	0	0	#
chr4	140721186	+	NM_173867	Rcc2	stopC	10	5	0.5	0	0	0	0	0	0	#
chr4	141874712	-	NM_025994	Efhd2	startC	17	2	0.118	13	2	0.154	14	2	0.143	0.138333
chr4	141874718	-	NM_025994	Efhd2	startC	18	3	0.167	13	3	0.231	14	2	0.143	0.180333
chr4	141874721	-	NM_025994	Efhd2	startC	18	2	0.111	13	2	0.154	10	1	0.1	0.121667
chr4	141874773	-	NM_025994	Efhd2	startC	10	1	0.1	11	4	0.364	10	1	0.1	0.188
chr4	141874789	-	NM_025994	Efhd2	startC	25	4	0.16	23	3	0.13	0	0	0	#
chr4	148929237	+	NM_027195	Casz1	CDS	27	7	0.259	0	0	0	23	7	0.304	#
chr4	149425889	-	NM_022022	Ube4b	startC	10	1	0.1	0	0	0	0	0	0	#
chr4	149425891	-	NM_022022	Ube4b	startC	10	1	0.1	12	2	0.167	0	0	0	#
chr4	149647684	+	NM_023051	Clstn1	stopC	12	4	0.333	0	0	0	13	4	0.308	#
chr4	150406382	+	NM_001085492	Rere	startC	12	2	0.167	16	3	0.188	13	2	0.154	0.169667
chr4	150406388	+	NM_001085492	Rere	startC	18	5	0.278	25	3	0.12	22	5	0.227	0.208333
chr4	150406444	+	NM_001085492	Rere	startC	15	2	0.133	16	3	0.188	14	2	0.143	0.154667
chr4	150406449	+	NM_001085492	Rere	startC	17	2	0.118	0	0	0	17	3	0.176	#
chr4	150406453	+	NM_001085492	Rere	startC	18	2	0.111	19	2	0.105	0	0	0	#
chr4	150406459	+	NM_001085492	Rere	startC	18	2	0.111	19	2	0.105	17	2	0.118	0.111333
chr4	150406465	+	NM_001085492	Rere	startC	17	2	0.118	0	0	0	0	0	0	#
chr4	154278966	-	NM_001112744	Arhgef16	stopC	26	7	0.269	28	7	0.25	25	8	0.32	0.279667
chr4	155491414	+	NM_008142	Gnb1	5UTR	13	2	0.154	11	4	0.364	0	0	0	#
chr4	155491417	+	NM_008142	Gnb1	5UTR	10	1	0.1	10	1	0.1	0	0	0	#
chr4	155491474	+	NM_008142	Gnb1	5UTR	14	2	0.143	17	5	0.294	10	3	0.3	0.245667
chr4	155491491	+	NM_008142	Gnb1	5UTR	28	4	0.143	0	0	0	0	0	0	#
chr4	155491501	+	NM_008142	Gnb1	5UTR	27	4	0.148	0	0	0	0	0	0	#
chr4	155491507	+	NM_008142	Gnb1	5UTR	33	4	0.125	0	0	0	29	3	0.107	#
chr4	155491553	+	NM_008142	Gnb1	5UTR	19	2	0.105	0	0	0	0	0	0	#
chr4	155491561	+	NM_008142	Gnb1	5UTR	38	5	0.132	0	0	0	40	5	0.125	#
chr4	155491566	+	NM_008142	Gnb1	5UTR	47	7	0.149	54	6	0.111	52	8	0.154	0.138
chr4	155491567	+	NM_008142	Gnb1	5UTR	48	5	0.104	57	6	0.105	53	6	0.113	0.107333
chr4	155491577	+	NM_008142	Gnb1	5UTR	91	10	0.112	99	12	0.128	90	16	0.18	0.14
chr4	155515636	+	NM_008142	Gnb1	5UTR	15	4	0.267	18	2	0.111	20	3	0.15	0.176
chr4	155515670	+	NM_008142	Gnb1	5UTR	13	2	0.154	16	3	0.188	11	3	0.273	0.205
chr4	155527446	+	NM_008142	Gnb1	startC	65	12	0.185	73	11	0.151	59	7	0.119	0.151667
chr4	155527462	+	NM_008142	Gnb1	startC	25	4	0.16	26	3	0.115	28	3	0.107	0.127333
chr4	155527467	+	NM_008142	Gnb1	startC	26	6	0.231	24	5	0.208	29	4	0.138	0.192333
chr4	155527485	+	NM_008142	Gnb1	startC	19	3	0.158	0	0	0	0	0	0	#
chr4	155563952	+	NM_001159637	Nadk	5UTR	10	1	0.1	0	0	0	10	1	0.1	#
chr4	155563955	+	NM_001159637	Nadk	5UTR	10	2	0.2	14	2	0.143	10	1	0.1	0.147667
chr4	155563964	+	NM_001159637	Nadk	5UTR	10	1	0.1	0	0	0	0	0	0	#
chr4	155853891	+	uc008wfb.1	Dvl1	5UTR	20	3	0.15	28	4	0.143	26	3	0.115	0.136
chr4	43555376	-	NM_011602	Tln1	CDS	0	0	0	23	7	0.304	0	0	0	#
chr4	44032470	+	NM_016760	Clta	stopC	0	0	0	12	4	0.333	0	0	0	#
chr4	45802775	+	NM_028270	Aldh1b1	CDS	0	0	0	36	10	0.278	0	0	0	#
chr4	45804321	+	NM_028270	Aldh1b1	3UTR	0	0	0	15	4	0.267	17	4	0.235	#
chr4	45804445	+	NM_028270	Aldh1b1	3UTR	0	0	0	20	6	0.3	17	5	0.294	#
chr4	46538930	-	NM_178893	Coro2a	3UTR	0	0	0	18	5	0.278	0	0	0	#
chr4	49541239	-	NM_144903	Aldob	CDS	0	0	0	140	14	0.1	0	0	0	#
chr4	55532170	-	NM_010637	Klf4	5UTR	0	0	0	17	2	0.118	12	2	0.167	#
chr4	57951845	-	NM_011660	Txn1	CDS	0	0	0	22	7	0.318	0	0	0	#
chr4	57956224	-	NM_011660	Txn1	startC	0	0	0	26	4	0.154	0	0	0	#
chr4	82292904	-	NM_008687	Nfib	3UTR	0	0	0	15	4	0.267	11	4	0.364	#
chr4	95967471	+	NM_030014	Hook1	startC	0	0	0	26	4	0.154	23	5	0.217	#
chr4	98405582	+	NM_172696	Inadl	startC	0	0	0	20	2	0.1	14	3	0.214	#
chr4	98405598	+	NM_172696	Inadl	startC	0	0	0	10	1	0.1	0	0	0	#
chr4	98717929	+	NM_007704	Inadl	stopC	0	0	0	11	4	0.364	0	0	0	#
chr4	109013787	+	NM_146150	Nrd1	CDS	0	0	0	66	11	0.167	0	0	0	#
chr4	109676741	+	NM_007983	Faf1	5UTR	0	0	0	10	1	0.1	10	2	0.2	#
chr4	109676751	+	NM_007983	Faf1	5UTR	0	0	0	12	2	0.167	0	0	0	#
chr4	116641865	-	NM_021473	Akr1a1	CDS	0	0	0	39	8	0.205	0	0	0	#
chr4	116802287	+	NM_146151	Tesk2	CDS	0	0	0	18	6	0.333	0	0	0	#
chr4	118269532	-	NM_011213	Ptprf	CDS	0	0	0	12	5	0.417	0	0	0	#
chr4	118620918	+	NM_026932	Ebna1bp2	startC	0	0	0	12	4	0.333	0	0	0	#
chr4	119294385	-	NM_011732	Ybx1	startC	0	0	0	12	3	0.25	11	3	0.273	#
chr4	122872439	-	NM_007598	Cap1	startC	0	0	0	18	2	0.111	15	3	0.2	#
chr4	126756913	+	NM_133886	AU040320	startC	0	0	0	16	2	0.125	0	0	0	#
chr4	126756915	+	NM_133886	AU040320	startC	0	0	0	18	2	0.111	0	0	0	#
chr4	129008046	+	NM_016895	Ak2	CDS	0	0	0	18	6	0.333	0	0	0	#
chr4	129011104	+	NM_016895	Ak2	3UTR	0	0	0	33	6	0.182	0	0	0	#
chr4	129105649	+	NM_025452	Tmem54	startC	0	0	0	35	4	0.114	28	4	0.143	#
chr4	129221875	-	NM_001033189	C77080	CDS	0	0	0	11	7	0.636	10	6	0.6	#
chr4	129820446	+	ENSMUST00000030578	Ptp4a2	5UTR	0	0	0	10	3	0.3	0	0	0	#
chr4	133600659	-	NM_018754	Sfn	3UTR	0	0	0	24	6	0.25	0	0	0	#
chr4	133600707	-	NM_018754	Sfn	3UTR	0	0	0	23	5	0.217	0	0	0	#
chr4	135214905	-	NM_013885	Clic4	3UTR	0	0	0	19	5	0.263	0	0	0	#
chr4	135872950	-	NM_026383	Pnrc2	5UTR	0	0	0	17	3	0.176	0	0	0	#
chr4	138456833	+	NM_025451	Camk2n1	stopC	0	0	0	27	7	0.259	0	0	0	#
chr4	140961456	+	NM_023374	Sdhb	startC	0	0	0	10	2	0.2	0	0	0	#
chr4	141472929	-	NM_019763	Spen	CDS	0	0	0	12	5	0.417	0	0	0	#
chr4	141685092	-	NM_023544	Rsc1a1	CDS	0	0	0	19	6	0.316	0	0	0	#
chr4	145178206	-	NM_001276465	Vps13d	CDS	0	0	0	66	13	0.197	62	10	0.161	#
chr4	148952421	+	NM_001159344	Casz1	stopC	0	0	0	39	7	0.179	37	6	0.162	#
chr4	149425885	-	NM_022022	Ube4b	startC	0	0	0	15	2	0.133	10	1	0.1	#
chr4	149647432	+	NM_023051	Clstn1	stopC	0	0	0	13	5	0.385	0	0	0	#
chr4	149647503	+	NM_023051	Clstn1	stopC	0	0	0	11	4	0.364	0	0	0	#
chr4	150406387	+	NM_001085492	Rere	startC	0	0	0	23	3	0.13	0	0	0	#
chr4	154278943	-	NM_001112744	Arhgef16	stopC	0	0	0	23	6	0.261	0	0	0	#
chr4	154278955	-	NM_001112744	Arhgef16	stopC	0	0	0	27	6	0.222	25	7	0.28	#
chr4	155491571	+	NM_008142	Gnb1	5UTR	0	0	0	69	7	0.104	0	0	0	#
chr4	155543178	+	NM_008142	Gnb1	CDS	0	0	0	20	9	0.45	0	0	0	#
chr4	155647497	+	NM_007661	Cdk11b	CDS	0	0	0	51	10	0.196	47	9	0.191	#
chr4	155962394	+	NM_026125	Fam132a	startC	0	0	0	17	2	0.118	22	3	0.136	#
chr4	24898215	+	NM_026742	Ndufaf4	startC	0	0	0	0	0	0	16	2	0.125	#
chr4	40948002	-	NM_009736	Bag1	startC	0	0	0	0	0	0	11	2	0.182	#
chr4	43522704	-	NM_009416	Tpm2	CDS	0	0	0	0	0	0	41	10	0.244	#
chr4	48279531	-	NM_029572	Erp44	startC	0	0	0	0	0	0	10	3	0.3	#
chr4	53860690	+	NM_028053	Tmem38b	3UTR	0	0	0	0	0	0	10	10	1	#
chr4	55532326	-	NM_010637	Klf4	5UTR	0	0	0	0	0	0	10	1	0.1	#
chr4	56800000	-	NM_026079	Ikbkap	startC	0	0	0	0	0	0	10	1	0.1	#
chr4	56800004	-	NM_026079	Ikbkap	startC	0	0	0	0	0	0	10	2	0.2	#
chr4	57956223	-	NM_011660	Txn1	startC	0	0	0	0	0	0	29	6	0.207	#
chr4	59189280	+	ENSMUST00000030074	Ugcg	5UTR	0	0	0	0	0	0	41	5	0.122	#
chr4	62523988	-	NM_021498	Pole3	stopC	0	0	0	0	0	0	30	6	0.2	#
chr4	82292789	-	NM_008687	Nfib	3UTR	0	0	0	0	0	0	13	4	0.308	#
chr4	95052147	-	NM_010591	Jun	5UTR	0	0	0	0	0	0	39	7	0.179	#
chr4	98405570	+	NM_172696	Inadl	startC	0	0	0	0	0	0	10	1	0.1	#
chr4	108055488	-	NM_011327	Scp2	CDS	0	0	0	0	0	0	55	10	0.182	#
chr4	109676745	+	NM_007983	Faf1	5UTR	0	0	0	0	0	0	11	3	0.273	#
chr4	109676764	+	NM_007983	Faf1	5UTR	0	0	0	0	0	0	12	3	0.25	#
chr4	115738707	+	NM_172698	Efcab14	startC	0	0	0	0	0	0	11	2	0.182	#
chr4	118237882	-	NM_011213	Ptprf	CDS	0	0	0	0	0	0	28	7	0.25	#
chr4	119658870	-	NM_008191	Guca2b	startC	0	0	0	0	0	0	140	17	0.121	#
chr4	123664716	-	uc008upq.1	Macf1	startC	0	0	0	0	0	0	14	3	0.214	#
chr4	129011037	+	NM_016895	Ak2	3UTR	0	0	0	0	0	0	12	4	0.333	#
chr4	129820506	+	NM_008974	Ptp4a2	5UTR	0	0	0	0	0	0	10	1	0.1	#
chr4	132007115	-	NM_183428	Epb4.1	CDS	0	0	0	0	0	0	36	8	0.222	#
chr4	133600657	-	NM_018754	Sfn	3UTR	0	0	0	0	0	0	19	5	0.263	#
chr4	133600683	-	NM_018754	Sfn	3UTR	0	0	0	0	0	0	35	9	0.273	#
chr4	136602453	-	NM_133872	Kdm1a	startC	0	0	0	0	0	0	10	2	0.2	#
chr4	140961425	+	NM_023374	Sdhb	startC	0	0	0	0	0	0	10	1	0.1	#
chr4	148952415	+	NM_001159344	Casz1	stopC	0	0	0	0	0	0	36	8	0.222	#
chr4	149646879	+	NM_023051	Clstn1	CDS	0	0	0	0	0	0	30	8	0.267	#
chr4	154899044	-	ENSMUST00000030935	Fam213b	startC	0	0	0	0	0	0	11	2	0.182	#
chr4	155082733	-	NM_026395	Rer1	startC	0	0	0	0	0	0	20	2	0.1	#
chr4	155491497	+	NM_008142	Gnb1	5UTR	0	0	0	0	0	0	20	3	0.15	#
chr4	155853896	+	uc008wfb.1	Dvl1	5UTR	0	0	0	0	0	0	27	3	0.111	#
chr5	9100835	+	NM_001081029	Tmem243	5UTR	13	4	0.308	13	3	0.231	17	3	0.176	0.238333
chr5	9100846	+	NM_001081029	Tmem243	5UTR	13	3	0.231	14	2	0.143	17	3	0.176	0.183333
chr5	9101377	+	NM_001081029	Tmem243	startC	10	1	0.1	0	0	0	10	1	0.1	#
chr5	24697055	+	NM_016736	Nub1	CDS	13	5	0.385	0	0	0	10	5	0.5	#
chr5	24908341	-	NM_145401	Prkag2	CDS	11	6	0.545	19	8	0.421	11	6	0.545	0.503667
chr5	30142766	-	NM_178878	Hadha	CDS	19	6	0.316	24	7	0.292	0	0	0	#
chr5	30907598	-	NM_001134692	Ost4	startC	14	2	0.143	16	3	0.188	18	3	0.167	0.166
chr5	30907605	-	NM_001134692	Ost4	startC	11	3	0.273	16	2	0.125	16	4	0.25	0.216
chr5	30933551	-	NM_026770	Cgref1	stopC	11	4	0.364	0	0	0	10	4	0.4	#
chr5	30933621	-	NM_026770	Cgref1	stopC	32	6	0.188	31	10	0.323	28	11	0.393	0.301333
chr5	30945418	-	NM_026770	Cgref1	startC	11	2	0.182	0	0	0	11	2	0.182	#
chr5	31243968	+	NM_147201	Nrbp1	startC	15	2	0.133	20	3	0.15	16	3	0.2	0.161
chr5	31243970	+	NM_147201	Nrbp1	startC	16	2	0.125	22	4	0.182	17	2	0.118	0.141667
chr5	31622493	+	NM_025796	Mrpl33	stopC	13	4	0.308	0	0	0	0	0	0	#
chr5	33019077	+	NM_011738	Ywhah	startC	15	2	0.133	0	0	0	0	0	0	#
chr5	33019089	+	NM_011738	Ywhah	startC	14	3	0.214	18	2	0.111	14	2	0.143	0.156
chr5	33019095	+	NM_011738	Ywhah	startC	15	3	0.2	17	3	0.176	15	3	0.2	0.192
chr5	33019099	+	NM_011738	Ywhah	startC	14	3	0.214	19	5	0.263	14	4	0.286	0.254333
chr5	33019117	+	NM_011738	Ywhah	startC	19	3	0.158	21	5	0.238	19	5	0.263	0.219667
chr5	33019127	+	NM_011738	Ywhah	startC	16	3	0.188	18	3	0.167	18	4	0.222	0.192333
chr5	33104288	+	NM_019810	Slc5a1	startC	33	4	0.121	0	0	0	0	0	0	#
chr5	33104306	+	NM_019810	Slc5a1	startC	41	5	0.122	0	0	0	0	0	0	#
chr5	33104325	+	NM_019810	Slc5a1	startC	15	2	0.133	17	3	0.176	15	2	0.133	0.147333
chr5	33104414	+	NM_019810	Slc5a1	startC	40	9	0.225	46	9	0.196	41	10	0.244	0.221667
chr5	33104416	+	NM_019810	Slc5a1	startC	43	7	0.163	48	7	0.146	42	8	0.19	0.166333
chr5	33104424	+	NM_019810	Slc5a1	startC	48	6	0.125	53	8	0.151	49	7	0.143	0.139667
chr5	33159128	+	NM_019810	Slc5a1	CDS	86	15	0.174	0	0	0	0	0	0	#
chr5	33159135	+	NM_019810	Slc5a1	CDS	89	13	0.146	108	14	0.13	0	0	0	#
chr5	33160829	+	NM_019810	Slc5a1	stopC	80	9	0.113	96	11	0.115	85	9	0.106	0.111333
chr5	33160841	+	NM_019810	Slc5a1	stopC	120	15	0.126	139	16	0.115	129	14	0.109	0.116667
chr5	33160846	+	NM_019810	Slc5a1	stopC	140	16	0.114	0	0	0	0	0	0	#
chr5	33160859	+	NM_019810	Slc5a1	stopC	177	19	0.107	199	24	0.121	187	23	0.123	0.117
chr5	33161220	+	NM_019810	Slc5a1	3UTR	13	4	0.308	15	5	0.333	13	6	0.462	0.367667
chr5	33162473	+	NM_019810	Slc5a1	3UTR	14	7	0.5	0	0	0	0	0	0	#
chr5	33162522	+	NM_019810	Slc5a1	3UTR	27	14	0.519	30	12	0.4	27	8	0.296	0.405
chr5	36493088	-	NM_133910	Tbc1d14	stopC	13	4	0.308	10	4	0.4	0	0	0	#
chr5	36796442	-	NM_026242	Mrfap1	startC	11	3	0.273	20	3	0.15	14	2	0.143	0.188667
chr5	36796445	-	NM_026242	Mrfap1	startC	11	2	0.182	20	5	0.25	14	3	0.214	0.215333
chr5	36796452	-	NM_026242	Mrfap1	startC	11	2	0.182	0	0	0	0	0	0	#
chr5	36796627	-	NM_026242	Mrfap1	startC	22	3	0.136	0	0	0	0	0	0	#
chr5	36796645	-	NM_026242	Mrfap1	startC	19	2	0.105	0	0	0	0	0	0	#
chr5	37085410	+	NM_178394	Jakmip1	startC	10	1	0.111	12	3	0.273	0	0	0	#
chr5	45857509	-	NM_178142	Lcorl	startC	12	2	0.167	10	1	0.1	0	0	0	#
chr5	52190285	-	NM_007839	Dhx15	startC	28	3	0.107	30	5	0.167	29	3	0.103	0.125667
chr5	52190286	-	NM_007839	Dhx15	startC	28	4	0.143	32	4	0.125	29	7	0.241	0.169667
chr5	52741776	+	NM_025951	Pi4k2b	startC	10	3	0.3	0	0	0	0	0	0	#
chr5	64093025	+	NM_025700	Pgm1	startC	21	6	0.286	20	3	0.15	27	5	0.185	0.207
chr5	64093031	+	NM_025700	Pgm1	startC	26	3	0.12	28	6	0.214	36	4	0.111	0.148333
chr5	64093043	+	NM_025700	Pgm1	startC	27	4	0.148	0	0	0	0	0	0	#
chr5	64803674	+	NM_008453	Klf3	5UTR	11	2	0.182	15	2	0.133	12	2	0.167	0.160667
chr5	65537371	+	NM_016786	Ube2k	startC	16	2	0.125	21	6	0.286	15	6	0.4	0.270333
chr5	65537378	+	NM_016786	Ube2k	startC	16	3	0.188	22	5	0.227	14	5	0.357	0.257333
chr5	65537497	+	NM_016786	Ube2k	startC	10	2	0.2	0	0	0	0	0	0	#
chr5	65537502	+	NM_016786	Ube2k	startC	10	1	0.1	0	0	0	0	0	0	#
chr5	65537532	+	NM_016786	Ube2k	startC	28	5	0.179	33	6	0.182	18	3	0.167	0.176
chr5	66026757	-	NM_139065	Rbm47	CDS	24	7	0.292	0	0	0	0	0	0	#
chr5	67847173	-	NM_009727	Atp8a1	startC	10	2	0.2	14	4	0.286	11	3	0.273	0.253
chr5	67847177	-	NM_009727	Atp8a1	startC	10	1	0.1	14	2	0.143	12	2	0.167	0.136667
chr5	72914673	+	NM_153567	Slain2	startC	24	3	0.125	28	4	0.143	19	3	0.158	0.142
chr5	72914682	+	NM_153567	Slain2	startC	23	4	0.174	28	3	0.107	18	2	0.111	0.130667
chr5	72914694	+	NM_153567	Slain2	startC	10	3	0.3	0	0	0	0	0	0	#
chr5	76857264	+	NM_001163793	C530008M17Rik	CDS	34	9	0.265	0	0	0	0	0	0	#
chr5	76857265	+	NM_001163793	C530008M17Rik	CDS	34	8	0.235	0	0	0	0	0	0	#
chr5	86804357	+	ENSMUST00000119339	Ythdc1	5UTR	20	6	0.3	22	4	0.182	19	3	0.158	0.213333
chr5	86804445	+	ENSMUST00000119339	Ythdc1	startC	16	4	0.25	16	2	0.125	0	0	0	#
chr5	86804449	+	ENSMUST00000119339	Ythdc1	startC	17	2	0.118	0	0	0	0	0	0	#
chr5	86804453	+	ENSMUST00000119339	Ythdc1	startC	16	4	0.25	16	2	0.125	11	2	0.182	0.185667
chr5	88521435	-	NM_152839	Igj	stopC	21	5	0.238	0	0	0	0	0	0	#
chr5	88554808	+	NM_023054	Utp3	startC	12	3	0.25	0	0	0	0	0	0	#
chr5	88934785	+	NM_018760	Slc4a4	startC	10	2	0.2	13	2	0.154	11	3	0.273	0.209
chr5	90365901	-	NM_030886	Ankrd17	startC	10	1	0.1	21	5	0.238	10	1	0.1	0.146
chr5	90365923	-	NM_030886	Ankrd17	startC	10	2	0.2	12	2	0.167	10	1	0.1	0.155667
chr5	90366124	-	NM_030886	Ankrd17	startC	10	1	0.1	0	0	0	10	3	0.3	#
chr5	90366130	-	NM_030886	Ankrd17	startC	10	1	0.1	0	0	0	10	2	0.2	#
chr5	92054960	-	NM_011816	G3bp2	stopC	24	6	0.25	37	9	0.243	22	5	0.227	0.24
chr5	92194089	+	NM_019490	Uso1	CDS	24	7	0.292	0	0	0	0	0	0	#
chr5	92953008	+	NM_015756	Shroom3	CDS	31	9	0.3	0	0	0	24	8	0.333	#
chr5	93206023	-	NM_017367	Ccni	5UTR	26	5	0.192	27	4	0.148	25	4	0.16	0.166667
chr5	93206029	-	NM_017367	Ccni	5UTR	25	3	0.12	27	3	0.111	26	3	0.115	0.115333
chr5	93206036	-	NM_017367	Ccni	5UTR	17	5	0.294	0	0	0	0	0	0	#
chr5	93206037	-	NM_017367	Ccni	5UTR	17	2	0.118	17	4	0.235	17	4	0.235	0.196
chr5	93267758	+	NM_007635	Ccng2	5UTR	13	2	0.154	13	3	0.231	13	2	0.154	0.179667
chr5	93267776	+	NM_007635	Ccng2	5UTR	13	2	0.154	0	0	0	0	0	0	#
chr5	99978466	-	NM_007516	Hnrnpd	startC	18	5	0.278	22	6	0.273	22	4	0.182	0.244333
chr5	100416118	-	NM_026969	Sec31a	5UTR	10	1	0.1	10	1	0.1	10	2	0.2	0.133333
chr5	100572178	-	NM_139198	Plac8	5UTR	13	2	0.154	15	2	0.133	12	3	0.25	0.179
chr5	101822675	+	NM_173370	Cds1	3UTR	22	7	0.318	36	6	0.167	0	0	0	#
chr5	103990221	-	NM_053262	Hsd17b11	3UTR	18	5	0.278	27	6	0.222	17	5	0.294	0.264667
chr5	104092742	-	NM_010097	Sparcl1	CDS	39	9	0.231	61	14	0.23	42	11	0.262	0.241
chr5	104092960	-	NM_010097	Sparcl1	CDS	83	18	0.217	96	14	0.146	75	11	0.149	0.170667
chr5	108472428	+	NM_172716	Pcgf3	5UTR	22	4	0.182	25	4	0.16	26	3	0.115	0.152333
chr5	110107985	-	NM_145147	Gtpbp6	startC	10	1	0.1	0	0	0	0	0	0	#
chr5	114804564	+	NM_026718	Ankrd13a	stopC	17	6	0.353	0	0	0	23	6	0.261	#
chr5	115143789	-	NM_175403	Mlec	3UTR	11	7	0.636	0	0	0	0	0	0	#
chr5	115143797	-	NM_175403	Mlec	3UTR	24	5	0.208	31	6	0.194	0	0	0	#
chr5	115300604	-	NM_019682	Dynll1	startC	10	3	0.3	0	0	0	0	0	0	#
chr5	117115680	-	NM_178622	Suds3	startC	44	7	0.159	0	0	0	0	0	0	#
chr5	117115716	-	NM_178622	Suds3	startC	69	7	0.101	101	12	0.119	77	12	0.156	0.125333
chr5	119671320	+	NM_011535	Tbx3	5UTR	13	2	0.154	15	3	0.2	12	2	0.167	0.173667
chr5	119671325	+	NM_011535	Tbx3	5UTR	14	3	0.214	17	5	0.294	15	3	0.214	0.240667
chr5	121191232	-	NM_011202	Ptpn11	startC	23	3	0.13	28	7	0.25	27	7	0.259	0.213
chr5	121191242	-	NM_011202	Ptpn11	startC	23	4	0.174	29	3	0.103	29	4	0.138	0.138333
chr5	121220528	+	NM_181421	Gm15800	startC	12	2	0.167	0	0	0	0	0	0	#
chr5	122501616	-	NM_009722	Atp2a2	startC	15	3	0.2	16	3	0.188	14	2	0.143	0.177
chr5	122501726	-	NM_009722	Atp2a2	startC	12	2	0.167	13	4	0.308	10	4	0.4	0.291667
chr5	122501834	-	NM_009722	Atp2a2	startC	10	1	0.1	12	2	0.167	10	1	0.1	0.122333
chr5	122501836	-	NM_009722	Atp2a2	startC	10	3	0.3	11	2	0.182	10	2	0.2	0.227333
chr5	129501276	+	NM_172276	Sfswap	startC	10	1	0.1	10	1	0.1	10	1	0.1	0.1
chr5	129501292	+	NM_172276	Sfswap	startC	14	3	0.214	13	3	0.231	16	2	0.125	0.19
chr5	129501299	+	NM_172276	Sfswap	startC	15	2	0.133	12	2	0.167	0	0	0	#
chr5	134986263	+	NM_009902	Cldn3	startC	13	2	0.154	16	2	0.125	12	2	0.167	0.148667
chr5	134987116	+	NM_009902	Cldn3	stopC	29	7	0.241	28	6	0.214	0	0	0	#
chr5	136962201	+	NM_025562	Fis1	startC	12	2	0.167	10	1	0.1	10	2	0.2	0.155667
chr5	136962212	+	NM_025562	Fis1	startC	13	3	0.231	10	2	0.2	10	1	0.1	0.177
chr5	136967884	+	NM_021719	Cldn15	5UTR	10	2	0.2	0	0	0	17	2	0.118	#
chr5	136967935	+	NM_021719	Cldn15	startC	15	4	0.267	21	3	0.143	18	5	0.278	0.229333
chr5	136967942	+	NM_021719	Cldn15	startC	22	3	0.136	29	4	0.138	23	3	0.13	0.134667
chr5	136975533	+	NM_021719	Cldn15	3UTR	41	7	0.171	46	7	0.152	0	0	0	#
chr5	137154052	-	ENSMUST00000111075	Gm3054	stopC	39	14	0.359	43	8	0.186	32	7	0.219	0.254667
chr5	137165919	-	ENSMUST00000111075	Gm3054	startC	34	5	0.147	31	4	0.129	28	3	0.107	0.127667
chr5	137307071	-	NM_031405	Srrt	startC	10	3	0.3	0	0	0	0	0	0	#
chr5	137307095	-	NM_031405	Srrt	startC	10	2	0.2	0	0	0	0	0	0	#
chr5	137530742	-	NM_010312	Gnb2	startC	17	5	0.294	22	6	0.273	18	4	0.222	0.263
chr5	137747818	+	NM_023910	Tsc22d4	CDS	41	8	0.2	0	0	0	0	0	0	#
chr5	140419490	+	NM_133916	Eif3b	startC	16	2	0.125	17	2	0.118	0	0	0	#
chr5	140419532	+	NM_133916	Eif3b	startC	14	2	0.143	20	2	0.1	13	2	0.154	0.132333
chr5	140419533	+	NM_133916	Eif3b	startC	15	2	0.133	19	3	0.158	0	0	0	#
chr5	142773693	-	NM_178242	Tnrc18	CDS	20	7	0.35	0	0	0	0	0	0	#
chr5	142774017	-	NM_178242	Tnrc18	CDS	46	9	0.196	49	10	0.204	37	10	0.27	0.223333
chr5	142903159	-	NM_007393	Actb	3UTR	34	7	0.206	40	6	0.15	40	7	0.175	0.177
chr5	142903180	-	NM_007393	Actb	3UTR	31	7	0.226	0	0	0	0	0	0	#
chr5	142903207	-	NM_007393	Actb	3UTR	29	6	0.207	0	0	0	44	7	0.159	#
chr5	142903216	-	NM_007393	Actb	3UTR	27	6	0.222	33	7	0.219	0	0	0	#
chr5	142903394	-	NM_007393	Actb	3UTR	104	15	0.144	127	19	0.15	105	16	0.152	0.148667
chr5	142903597	-	NM_007393	Actb	stopC	25	7	0.28	0	0	0	0	0	0	#
chr5	142903828	-	NM_007393	Actb	stopC	65	11	0.169	70	14	0.2	60	10	0.167	0.178667
chr5	142903895	-	NM_007393	Actb	stopC	72	11	0.153	90	11	0.122	76	10	0.132	0.135667
chr5	142904555	-	NM_007393	Actb	CDS	34	9	0.265	55	14	0.255	40	12	0.3	0.273333
chr5	142905427	-	NM_007393	Actb	CDS	74	11	0.149	0	0	0	0	0	0	#
chr5	142905585	-	NM_007393	Actb	startC	14	3	0.214	23	3	0.13	0	0	0	#
chr5	142905591	-	NM_007393	Actb	startC	22	3	0.136	29	4	0.138	20	2	0.1	0.124667
chr5	142905592	-	NM_007393	Actb	startC	20	5	0.25	30	5	0.167	22	5	0.227	0.214667
chr5	142905593	-	NM_007393	Actb	startC	25	3	0.12	32	4	0.125	26	5	0.192	0.145667
chr5	142905606	-	NM_007393	Actb	startC	61	7	0.115	0	0	0	0	0	0	#
chr5	143527925	-	NM_009007	Rac1	startC	23	3	0.13	26	3	0.115	21	4	0.19	0.145
chr5	143527932	-	NM_009007	Rac1	startC	30	6	0.2	36	5	0.139	27	7	0.259	0.199333
chr5	143527933	-	NM_009007	Rac1	startC	29	9	0.31	34	8	0.235	28	5	0.179	0.241333
chr5	143527940	-	NM_009007	Rac1	startC	27	3	0.111	31	4	0.129	23	3	0.13	0.123333
chr5	144100576	+	NM_001081109	Lmtk2	startC	12	4	0.333	17	7	0.412	12	7	0.583	0.442667
chr5	145114276	+	NM_023142	Arpc1b	5UTR	13	2	0.154	15	2	0.133	14	2	0.143	0.143333
chr5	145114293	+	NM_023142	Arpc1b	5UTR	19	2	0.105	26	3	0.115	19	2	0.105	0.108333
chr5	145183828	-	NM_020582	Atp5j2	stopC	26	7	0.269	37	12	0.324	0	0	0	#
chr5	146210664	-	NM_028774	Rnf6	CDS	32	9	0.281	0	0	0	0	0	0	#
chr5	30930605	+	NM_008439	Khk	CDS	0	0	0	25	7	0.28	0	0	0	#
chr5	30933723	-	NM_026770	Cgref1	CDS	0	0	0	45	10	0.222	34	11	0.324	#
chr5	30945416	-	NM_026770	Cgref1	startC	0	0	0	13	3	0.231	0	0	0	#
chr5	31174425	-	NM_027901	Gtf3c2	startC	0	0	0	29	5	0.172	17	4	0.235	#
chr5	32154894	+	NM_008037	Fosl2	3UTR	0	0	0	11	4	0.364	0	0	0	#
chr5	33019101	+	NM_011738	Ywhah	startC	0	0	0	16	5	0.312	0	0	0	#
chr5	33159127	+	NM_019810	Slc5a1	CDS	0	0	0	103	14	0.136	79	11	0.139	#
chr5	33269584	-	NM_001198860	Ctbp1	startC	0	0	0	16	2	0.125	0	0	0	#
chr5	38540543	-	NM_011715	Wdr1	CDS	0	0	0	44	11	0.25	0	0	0	#
chr5	45493546	+	NM_024434	Lap3	startC	0	0	0	10	1	0.1	0	0	0	#
chr5	52181053	-	NM_007839	Dhx15	CDS	0	0	0	39	8	0.205	0	0	0	#
chr5	53170429	-	NM_172710	Sel1l3	CDS	0	0	0	54	10	0.185	0	0	0	#
chr5	86891186	-	NM_153598	Ugt2b34	stopC	0	0	0	20	5	0.25	0	0	0	#
chr5	88521434	-	NM_152839	Igj	stopC	0	0	0	33	6	0.182	0	0	0	#
chr5	100563184	-	ENSMUST00000112910	Plac8	5UTR	0	0	0	11	2	0.182	0	0	0	#
chr5	100563192	-	ENSMUST00000112910	Plac8	5UTR	0	0	0	12	3	0.25	0	0	0	#
chr5	101822671	+	NM_173370	Cds1	3UTR	0	0	0	25	5	0.2	0	0	0	#
chr5	104092736	-	NM_010097	Sparcl1	CDS	0	0	0	47	9	0.196	0	0	0	#
chr5	108433770	-	NM_007507	Atp5k	CDS	0	0	0	125	14	0.112	0	0	0	#
chr5	108472422	+	NM_172716	Pcgf3	5UTR	0	0	0	25	4	0.16	0	0	0	#
chr5	110107986	-	NM_145147	Gtpbp6	startC	0	0	0	11	2	0.182	0	0	0	#
chr5	115157891	-	NM_175403	Mlec	startC	0	0	0	13	2	0.154	0	0	0	#
chr5	117115679	-	NM_178622	Suds3	startC	0	0	0	54	6	0.111	0	0	0	#
chr5	119671338	+	NM_011535	Tbx3	5UTR	0	0	0	19	2	0.105	0	0	0	#
chr5	121131700	-	NM_011202	Ptpn11	3UTR	0	0	0	28	7	0.25	0	0	0	#
chr5	121191231	-	NM_011202	Ptpn11	startC	0	0	0	28	3	0.107	26	4	0.154	#
chr5	122501592	-	NM_009722	Atp2a2	startC	0	0	0	17	2	0.118	15	2	0.133	#
chr5	123450179	+	NM_133917	Mlxip	CDS	0	0	0	23	7	0.304	0	0	0	#
chr5	123512548	-	NM_023232	Diablo	stopC	0	0	0	17	5	0.294	0	0	0	#
chr5	124374368	-	NM_001081203	Sbno1	stopC	0	0	0	15	5	0.333	12	5	0.417	#
chr5	125454896	+	NM_029752	Bri3bp	stopC	0	0	0	15	5	0.333	0	0	0	#
chr5	134639288	-	NM_033561	Eif4h	startC	0	0	0	10	1	0.1	0	0	0	#
chr5	136967932	+	NM_021719	Cldn15	startC	0	0	0	19	2	0.105	0	0	0	#
chr5	137747387	+	NM_023910	Tsc22d4	CDS	0	0	0	20	7	0.35	0	0	0	#
chr5	137759132	+	NM_023910	Tsc22d4	stopC	0	0	0	46	7	0.152	48	7	0.146	#
chr5	137759143	+	NM_023910	Tsc22d4	stopC	0	0	0	24	6	0.25	18	5	0.278	#
chr5	139791623	+	NM_010757	Mafk	5UTR	0	0	0	11	3	0.273	10	1	0.1	#
chr5	139801373	+	NM_010757	Mafk	3UTR	0	0	0	13	4	0.308	0	0	0	#
chr5	142903167	-	NM_007393	Actb	3UTR	0	0	0	40	9	0.225	41	8	0.195	#
chr5	142903209	-	NM_007393	Actb	3UTR	0	0	0	38	6	0.158	0	0	0	#
chr5	142903419	-	NM_007393	Actb	3UTR	0	0	0	22	5	0.227	0	0	0	#
chr5	142903585	-	NM_007393	Actb	3UTR	0	0	0	46	7	0.152	40	6	0.15	#
chr5	142905645	-	NM_007393	Actb	startC	0	0	0	20	3	0.15	0	0	0	#
chr5	143507348	-	NM_009007	Rac1	CDS	0	0	0	19	7	0.368	0	0	0	#
chr5	144100583	+	NM_001081109	Lmtk2	startC	0	0	0	16	2	0.125	0	0	0	#
chr5	145108475	+	NM_019767	Arpc1a	stopC	0	0	0	23	7	0.304	20	5	0.25	#
chr5	145114336	+	NM_023142	Arpc1b	5UTR	0	0	0	28	3	0.107	0	0	0	#
chr5	145879831	-	NM_007818	Cyp3a11	startC	0	0	0	10	1	0.1	10	1	0.1	#
chr5	146385293	+	NM_145155	Wasf3	5UTR	0	0	0	49	7	0.143	0	0	0	#
chr5	147110750	+	NM_181730	Polr1d	stopC	0	0	0	39	7	0.179	0	0	0	#
chr5	147110761	+	NM_181730	Polr1d	stopC	0	0	0	25	6	0.24	0	0	0	#
chr5	147110765	+	NM_181730	Polr1d	stopC	0	0	0	26	6	0.231	0	0	0	#
chr5	24440693	+	NM_009207	Slc4a2	stopC	0	0	0	0	0	0	12	4	0.333	#
chr5	24908332	-	NM_145401	Prkag2	CDS	0	0	0	0	0	0	12	5	0.417	#
chr5	30907594	-	NM_001134692	Ost4	startC	0	0	0	0	0	0	20	2	0.1	#
chr5	30921913	+	NM_008439	Khk	startC	0	0	0	0	0	0	10	2	0.2	#
chr5	31174397	-	NM_027901	Gtf3c2	startC	0	0	0	0	0	0	14	2	0.143	#
chr5	31243939	+	NM_147201	Nrbp1	startC	0	0	0	0	0	0	28	3	0.107	#
chr5	31243961	+	NM_147201	Nrbp1	startC	0	0	0	0	0	0	17	2	0.118	#
chr5	32459296	+	NM_172707	Ppp1cb	startC	0	0	0	0	0	0	18	2	0.111	#
chr5	33019139	+	NM_011738	Ywhah	startC	0	0	0	0	0	0	18	3	0.167	#
chr5	33134624	+	NM_019810	Slc5a1	CDS	0	0	0	0	0	0	20	6	0.3	#
chr5	33160887	+	NM_019810	Slc5a1	stopC	0	0	0	0	0	0	131	16	0.123	#
chr5	34625402	+	NM_013457	Add1	CDS	0	0	0	0	0	0	38	8	0.211	#
chr5	45493548	+	NM_024434	Lap3	startC	0	0	0	0	0	0	10	1	0.1	#
chr5	65696826	-	NM_001081321	Pds5a	startC	0	0	0	0	0	0	19	2	0.105	#
chr5	65697830	-	NM_001081321	Pds5a	5UTR	0	0	0	0	0	0	10	2	0.2	#
chr5	65697834	-	NM_001081321	Pds5a	5UTR	0	0	0	0	0	0	10	2	0.2	#
chr5	73338582	-	NM_026950	Ociad2	5UTR	0	0	0	0	0	0	27	3	0.111	#
chr5	86891201	-	NM_153598	Ugt2b34	stopC	0	0	0	0	0	0	39	7	0.179	#
chr5	93274892	+	NM_007635	Ccng2	stopC	0	0	0	0	0	0	43	7	0.163	#
chr5	99978457	-	NM_007516	Hnrnpd	startC	0	0	0	0	0	0	27	4	0.148	#
chr5	113842582	-	NM_011779	Coro1c	3UTR	0	0	0	0	0	0	11	4	0.364	#
chr5	114363728	-	NM_026145	Kctd10	3UTR	0	0	0	0	0	0	16	5	0.312	#
chr5	115147068	-	NM_175403	Mlec	3UTR	0	0	0	0	0	0	12	5	0.417	#
chr5	115249004	-	NM_016698	Rnf10	CDS	0	0	0	0	0	0	49	9	0.184	#
chr5	117115702	-	NM_178622	Suds3	startC	0	0	0	0	0	0	104	11	0.106	#
chr5	117773358	+	ENSMUST00000180430	Ksr2	3UTR	0	0	0	0	0	0	17	5	0.294	#
chr5	122501604	-	NM_009722	Atp2a2	startC	0	0	0	0	0	0	21	3	0.143	#
chr5	122501718	-	NM_009722	Atp2a2	startC	0	0	0	0	0	0	10	2	0.2	#
chr5	130246046	-	NM_023248	Sbds	3UTR	0	0	0	0	0	0	17	4	0.235	#
chr5	134639272	-	NM_033561	Eif4h	startC	0	0	0	0	0	0	15	4	0.267	#
chr5	134986261	+	NM_009902	Cldn3	startC	0	0	0	0	0	0	11	2	0.182	#
chr5	135790232	+	NM_008617	Mdh2	stopC	0	0	0	0	0	0	61	8	0.131	#
chr5	137530759	-	NM_010312	Gnb2	startC	0	0	0	0	0	0	13	2	0.154	#
chr5	140419527	+	NM_133916	Eif3b	startC	0	0	0	0	0	0	14	2	0.143	#
chr5	144100582	+	NM_001081109	Lmtk2	startC	0	0	0	0	0	0	13	2	0.154	#
chr6	6578488	-	NM_009169	Shfm1	startC	20	2	0.1	27	4	0.148	0	0	0	#
chr6	6578504	-	NM_009169	Shfm1	startC	18	2	0.111	0	0	0	0	0	0	#
chr6	6578521	-	NM_009169	Shfm1	startC	29	4	0.138	25	4	0.16	0	0	0	#
chr6	6578531	-	NM_009169	Shfm1	startC	27	4	0.148	25	3	0.12	22	7	0.318	0.195333
chr6	6578556	-	NM_009169	Shfm1	startC	24	5	0.208	20	3	0.15	20	2	0.1	0.152667
chr6	6578563	-	NM_009169	Shfm1	startC	15	4	0.267	14	3	0.214	11	3	0.273	0.251333
chr6	7983282	-	ENSMUST00000178598	Gm9825	startC	18	2	0.111	21	3	0.158	10	2	0.2	0.156333
chr6	7983301	-	ENSMUST00000178598	Gm9825	startC	15	4	0.267	0	0	0	0	0	0	#
chr6	17065281	+	NM_207176	Tes	startC	10	1	0.1	0	0	0	0	0	0	#
chr6	17065282	+	NM_207176	Tes	startC	10	1	0.1	12	2	0.167	10	1	0.1	0.122333
chr6	17637099	+	NM_007604	Capza2	startC	14	3	0.214	20	2	0.1	18	3	0.167	0.160333
chr6	17637105	+	NM_007604	Capza2	startC	17	3	0.176	23	4	0.174	23	4	0.174	0.174667
chr6	22308438	-	NM_138587	Fam3c	stopC	23	5	0.227	0	0	0	12	4	0.364	#
chr6	29768607	+	NM_021414	Ahcyl2	startC	15	2	0.133	0	0	0	16	2	0.125	#
chr6	29768609	+	NM_021414	Ahcyl2	startC	15	4	0.267	20	2	0.1	17	2	0.118	0.161667
chr6	29768611	+	NM_021414	Ahcyl2	startC	14	3	0.214	0	0	0	0	0	0	#
chr6	29909946	+	NM_021414	Ahcyl2	3UTR	23	8	0.348	31	8	0.258	20	5	0.25	0.285333
chr6	32852172	-	NM_025336	Chchd3	CDS	21	8	0.381	0	0	0	29	8	0.276	#
chr6	34686031	+	uc009bhh.1	Cald1	startC	20	5	0.25	18	3	0.167	20	5	0.25	0.222333
chr6	34686040	+	uc009bhh.1	Cald1	startC	14	2	0.143	13	2	0.154	16	2	0.125	0.140667
chr6	34746151	+	uc009bhl.1	Cald1	startC	17	3	0.176	20	3	0.15	10	1	0.1	0.142
chr6	34746560	+	uc009bhl.1	Cald1	CDS	65	12	0.185	68	11	0.162	54	9	0.17	0.172333
chr6	34755876	+	NM_145575	Cald1	CDS	27	7	0.259	0	0	0	0	0	0	#
chr6	35539602	-	NM_008098	Mtpn	startC	14	2	0.143	19	3	0.158	20	5	0.25	0.183667
chr6	38875982	-	NM_010433	Hipk2	startC	10	2	0.2	13	2	0.154	10	1	0.1	0.151333
chr6	39381444	+	NM_011226	Rab19	5UTR	13	5	0.385	13	2	0.154	13	4	0.308	0.282333
chr6	39381447	+	NM_011226	Rab19	5UTR	12	3	0.25	0	0	0	0	0	0	#
chr6	39420137	-	NM_018810	Mkrn1	startC	17	3	0.176	14	4	0.286	11	2	0.182	0.214667
chr6	39420140	-	NM_018810	Mkrn1	startC	18	3	0.167	0	0	0	0	0	0	#
chr6	40666861	+	NM_001171003	Mgam	CDS	32	8	0.25	45	10	0.222	0	0	0	#
chr6	40672494	+	NM_001171003	Mgam	CDS	35	11	0.314	53	10	0.189	0	0	0	#
chr6	40675364	+	NM_001171003	Mgam	CDS	55	10	0.182	55	11	0.2	0	0	0	#
chr6	40757446	+	NM_001171003	Mgam	CDS	79	15	0.19	0	0	0	0	0	0	#
chr6	40764242	+	NM_001171003	Mgam	CDS	53	11	0.208	63	10	0.159	58	12	0.207	0.191333
chr6	40764247	+	NM_001171003	Mgam	CDS	53	9	0.17	0	0	0	0	0	0	#
chr6	40768882	+	NM_001171003	Mgam	3UTR	58	10	0.172	57	13	0.228	54	11	0.204	0.201333
chr6	42373140	-	NM_023580	Epha1	startC	22	5	0.227	32	6	0.188	25	4	0.16	0.191667
chr6	48835487	-	NM_023056	Tmem176b	CDS	28	8	0.286	0	0	0	0	0	0	#
chr6	48895282	+	NM_029638	Aoc1	5UTR	30	3	0.1	25	3	0.12	25	5	0.2	0.14
chr6	48895294	+	NM_029638	Aoc1	5UTR	10	1	0.1	10	1	0.1	11	2	0.182	0.127333
chr6	48905993	+	NM_029638	Aoc1	CDS	12	5	0.417	20	9	0.45	13	6	0.462	0.443
chr6	48906017	+	NM_029638	Aoc1	CDS	10	6	0.6	22	8	0.364	0	0	0	#
chr6	48908656	+	NM_029638	Aoc1	stopC	39	8	0.205	45	7	0.156	40	7	0.175	0.178667
chr6	48908839	+	NM_029638	Aoc1	stopC	22	5	0.227	0	0	0	24	6	0.25	#
chr6	51469825	-	NM_016806	Hnrnpa2b1	startC	18	3	0.167	0	0	0	0	0	0	#
chr6	51469826	-	NM_016806	Hnrnpa2b1	startC	18	2	0.111	14	2	0.143	0	0	0	#
chr6	51470675	+	NM_007624	Cbx3	5UTR	11	2	0.182	14	4	0.286	12	2	0.167	0.211667
chr6	51470686	+	NM_007624	Cbx3	5UTR	10	3	0.3	11	4	0.364	0	0	0	#
chr6	52733320	+	NM_025816	Tax1bp1	CDS	42	8	0.19	51	13	0.255	34	16	0.471	0.305333
chr6	54040073	+	NM_001163640	Chn2	startC	12	2	0.167	10	1	0.1	10	1	0.1	0.122333
chr6	54327015	+	NM_030024	Prr15	5UTR	84	16	0.19	105	19	0.181	85	14	0.165	0.178667
chr6	54329163	+	NM_030024	Prr15	startC	14	2	0.143	0	0	0	0	0	0	#
chr6	54329195	+	NM_030024	Prr15	startC	20	2	0.1	22	3	0.136	24	5	0.208	0.148
chr6	54329341	+	NM_030024	Prr15	startC	11	2	0.182	15	2	0.133	0	0	0	#
chr6	55079317	+	NM_180678	Gars	stopC	17	6	0.353	0	0	0	16	7	0.438	#
chr6	64729204	+	NM_007500	Atoh1	startC	14	3	0.214	21	3	0.143	11	2	0.182	0.179667
chr6	71199900	+	NM_017399	Fabp1	startC	20	7	0.35	21	7	0.333	28	7	0.25	0.311
chr6	71199915	+	NM_017399	Fabp1	startC	15	3	0.2	19	3	0.158	16	3	0.188	0.182
chr6	71201764	+	NM_017399	Fabp1	CDS	341	48	0.141	355	40	0.113	340	37	0.109	0.121
chr6	71203099	+	NM_017399	Fabp1	CDS	64	11	0.172	71	11	0.155	0	0	0	#
chr6	71440123	-	NM_024288	Rmnd5a	startC	12	3	0.25	19	2	0.111	11	4	0.364	0.241667
chr6	72390538	-	NM_016794	Vamp8	startC	12	3	0.25	17	5	0.294	12	2	0.167	0.237
chr6	78371247	+	NM_011036	Reg3b	startC	12	2	0.167	0	0	0	0	0	0	#
chr6	78372221	+	NM_011036	Reg3b	CDS	58	11	0.19	0	0	0	0	0	0	#
chr6	78372856	+	NM_011036	Reg3b	CDS	240	71	0.297	266	74	0.279	235	64	0.275	0.283667
chr6	78372904	+	NM_011036	Reg3b	CDS	41	10	0.244	41	12	0.293	34	13	0.382	0.306333
chr6	83189980	+	NM_007835	Dctn1	CDS	21	7	0.333	0	0	0	0	0	0	#
chr6	83195674	+	NM_007835	Dctn1	CDS	17	6	0.353	0	0	0	0	0	0	#
chr6	85069355	-	NM_177077	Exoc6b	startC	19	2	0.105	27	6	0.222	23	6	0.261	0.196
chr6	85069362	-	NM_177077	Exoc6b	startC	15	2	0.133	21	3	0.143	18	3	0.167	0.147667
chr6	85069365	-	NM_177077	Exoc6b	startC	12	2	0.167	0	0	0	0	0	0	#
chr6	86525753	-	NM_011865	Pcbp1	startC	16	2	0.125	20	5	0.25	13	3	0.25	0.208333
chr6	86525754	-	NM_011865	Pcbp1	startC	15	2	0.133	0	0	0	0	0	0	#
chr6	86525757	-	NM_011865	Pcbp1	startC	19	5	0.263	26	3	0.115	15	3	0.2	0.192667
chr6	86525767	-	NM_011865	Pcbp1	startC	24	6	0.25	32	6	0.188	17	5	0.294	0.244
chr6	86525769	-	NM_011865	Pcbp1	startC	25	3	0.12	31	5	0.161	18	2	0.111	0.130667
chr6	86525782	-	NM_011865	Pcbp1	startC	25	3	0.12	0	0	0	0	0	0	#
chr6	86525798	-	NM_011865	Pcbp1	startC	28	4	0.143	35	6	0.171	33	7	0.212	0.175333
chr6	86525799	-	NM_011865	Pcbp1	startC	32	5	0.156	38	5	0.132	35	6	0.171	0.153
chr6	86525812	-	NM_011865	Pcbp1	startC	35	5	0.143	0	0	0	35	4	0.114	#
chr6	86525829	-	NM_011865	Pcbp1	startC	40	7	0.175	50	6	0.12	38	8	0.211	0.168667
chr6	86525838	-	NM_011865	Pcbp1	startC	37	4	0.108	44	5	0.114	32	4	0.125	0.115667
chr6	86650955	-	NM_010751	Mxd1	stopC	26	7	0.269	0	0	0	0	0	0	#
chr6	86651051	-	NM_010751	Mxd1	stopC	27	6	0.222	35	6	0.171	23	7	0.304	0.232333
chr6	86651057	-	NM_010751	Mxd1	stopC	32	6	0.188	43	10	0.233	33	7	0.212	0.211
chr6	86668948	-	NM_010751	Mxd1	startC	12	2	0.167	18	2	0.111	17	3	0.176	0.151333
chr6	86669001	-	NM_010751	Mxd1	startC	12	2	0.167	0	0	0	0	0	0	#
chr6	86669004	-	NM_010751	Mxd1	startC	14	4	0.286	14	3	0.231	13	4	0.308	0.275
chr6	86669012	-	NM_010751	Mxd1	startC	11	2	0.182	18	2	0.111	11	2	0.182	0.158333
chr6	86669021	-	NM_010751	Mxd1	startC	13	2	0.154	16	2	0.125	0	0	0	#
chr6	86669026	-	NM_010751	Mxd1	startC	11	4	0.364	15	3	0.2	10	1	0.1	0.221333
chr6	86748942	-	NM_013471	Anxa4	CDS	63	11	0.175	79	15	0.19	67	10	0.149	0.171333
chr6	86748967	-	NM_013471	Anxa4	CDS	122	15	0.124	151	21	0.139	121	20	0.165	0.142667
chr6	86765782	-	NM_013471	Anxa4	startC	38	5	0.132	38	4	0.105	40	5	0.125	0.120667
chr6	86765784	-	NM_013471	Anxa4	startC	36	5	0.139	38	4	0.105	0	0	0	#
chr6	87811452	-	NM_001039394	Rab43	startC	21	4	0.19	23	6	0.261	20	5	0.25	0.233667
chr6	87851013	-	NM_013493	Cnbp	5UTR	13	2	0.154	12	2	0.167	12	2	0.167	0.162667
chr6	87904100	+	NM_017477	Copg1	CDS	70	10	0.145	0	0	0	0	0	0	#
chr6	108660680	+	NM_011498	Bhlhe40	5UTR	15	2	0.133	13	3	0.231	17	2	0.118	0.160667
chr6	108660699	+	NM_011498	Bhlhe40	5UTR	20	3	0.15	0	0	0	0	0	0	#
chr6	108660705	+	NM_011498	Bhlhe40	5UTR	18	4	0.222	20	2	0.1	22	4	0.182	0.168
chr6	108828659	+	NM_138677	Edem1	startC	12	3	0.25	12	3	0.25	10	2	0.2	0.233333
chr6	108828661	+	NM_138677	Edem1	startC	10	4	0.4	0	0	0	0	0	0	#
chr6	120364659	+	NM_145997	Kdm5a	startC	10	1	0.1	11	2	0.182	10	2	0.2	0.160667
chr6	122312337	+	NM_010749	M6pr	startC	16	2	0.125	17	2	0.118	10	1	0.1	0.114333
chr6	124663226	+	NM_145130	Lpcat3	startC	16	2	0.125	0	0	0	15	2	0.133	#
chr6	124663243	+	NM_145130	Lpcat3	startC	10	1	0.1	14	3	0.214	17	3	0.176	0.163333
chr6	124812422	-	NM_009415	Tpi1	CDS	39	8	0.211	0	0	0	0	0	0	#
chr6	124812483	-	NM_009415	Tpi1	CDS	38	9	0.237	0	0	0	31	8	0.258	#
chr6	124812978	-	ENSMUST00000149610	Tpi1	5UTR	10	1	0.1	11	2	0.182	10	1	0.1	0.127333
chr6	124914192	-	NM_026988	Ptms	stopC	33	10	0.303	38	14	0.368	38	14	0.368	0.346333
chr6	124914418	-	NM_026988	Ptms	CDS	84	15	0.179	0	0	0	0	0	0	#
chr6	124914948	-	NM_026988	Ptms	CDS	186	26	0.141	214	26	0.121	185	23	0.125	0.129
chr6	124914951	-	NM_026988	Ptms	CDS	177	18	0.102	212	22	0.104	172	26	0.151	0.119
chr6	124914952	-	NM_026988	Ptms	CDS	175	19	0.109	202	27	0.134	171	18	0.105	0.116
chr6	124917863	-	NM_026988	Ptms	5UTR	14	5	0.357	0	0	0	0	0	0	#
chr6	124917870	-	NM_026988	Ptms	5UTR	17	3	0.176	0	0	0	0	0	0	#
chr6	124917874	-	NM_026988	Ptms	5UTR	18	3	0.167	19	2	0.105	13	3	0.231	0.167667
chr6	125067930	+	NM_001163269	Lpar5	5UTR	17	2	0.118	13	2	0.154	10	3	0.3	0.190667
chr6	125067936	+	NM_001163269	Lpar5	5UTR	20	2	0.1	16	2	0.125	16	2	0.125	0.116667
chr6	125321492	+	NM_011324	Scnn1a	5UTR	19	2	0.105	0	0	0	0	0	0	#
chr6	125321522	+	NM_011324	Scnn1a	5UTR	17	4	0.235	27	3	0.111	18	4	0.222	0.189333
chr6	125321523	+	NM_011324	Scnn1a	5UTR	14	3	0.214	25	6	0.24	16	4	0.25	0.234667
chr6	125321529	+	NM_011324	Scnn1a	5UTR	14	3	0.214	24	6	0.25	15	3	0.2	0.221333
chr6	127603944	+	NM_001033464	Cracr2a	startC	10	1	0.1	0	0	0	0	0	0	#
chr6	127603965	+	NM_001033464	Cracr2a	startC	16	2	0.125	18	4	0.222	13	3	0.231	0.192667
chr6	128662471	+	NM_053165	Clec2h	startC	18	2	0.111	18	2	0.111	0	0	0	#
chr6	128662477	+	NM_053165	Clec2h	startC	16	2	0.125	20	4	0.2	17	2	0.118	0.147667
chr6	128662481	+	NM_053165	Clec2h	startC	19	3	0.158	19	3	0.158	17	2	0.118	0.144667
chr6	128662510	+	NM_053165	Clec2h	startC	23	3	0.13	0	0	0	0	0	0	#
chr6	128675815	+	NM_053165	Clec2h	stopC	84	11	0.131	0	0	0	77	11	0.143	#
chr6	128676091	+	NM_053165	Clec2h	stopC	99	14	0.141	107	12	0.112	85	11	0.129	0.127333
chr6	135023315	+	NM_026360	Ddx47	stopC	13	4	0.308	0	0	0	0	0	0	#
chr6	136781715	-	NM_145067	Gucy2c	startC	17	2	0.118	27	4	0.148	20	2	0.1	0.122
chr6	136781725	-	NM_145067	Gucy2c	startC	11	2	0.182	19	3	0.158	0	0	0	#
chr6	137522843	-	NM_007945	Eps8	CDS	12	5	0.417	13	6	0.462	0	0	0	#
chr6	137735285	+	NM_011499	Strap	startC	10	1	0.1	0	0	0	0	0	0	#
chr6	137735288	+	NM_011499	Strap	startC	10	1	0.1	0	0	0	0	0	0	#
chr6	137735306	+	NM_011499	Strap	startC	10	1	0.1	10	1	0.1	10	1	0.1	0.1
chr6	138147670	+	NM_019946	Mgst1	startC	13	2	0.154	0	0	0	0	0	0	#
chr6	140624305	+	NM_009637	Aebp2	startC	10	2	0.2	0	0	0	0	0	0	#
chr6	140624316	+	NM_009637	Aebp2	startC	10	1	0.1	0	0	0	0	0	0	#
chr6	143167523	+	NM_029250	Etnk1	startC	23	4	0.174	20	3	0.15	13	4	0.308	0.210667
chr6	143167550	+	NM_029250	Etnk1	startC	18	2	0.111	19	5	0.263	15	2	0.133	0.169
chr6	148211975	-	NM_026168	Ergic2	5UTR	10	2	0.2	10	1	0.1	10	1	0.1	0.133333
chr6	6578519	-	NM_009169	Shfm1	startC	0	0	0	25	5	0.2	0	0	0	#
chr6	17065272	+	NM_207176	Tes	startC	0	0	0	11	2	0.182	0	0	0	#
chr6	17065273	+	NM_207176	Tes	startC	0	0	0	11	3	0.273	0	0	0	#
chr6	17637081	+	ENSMUST00000015877	Capza2	startC	0	0	0	10	4	0.4	0	0	0	#
chr6	17637096	+	ENSMUST00000015877	Capza2	startC	0	0	0	18	3	0.167	0	0	0	#
chr6	29768580	+	NM_021414	Ahcyl2	startC	0	0	0	11	3	0.273	11	2	0.182	#
chr6	29911532	+	NM_021414	Ahcyl2	3UTR	0	0	0	20	5	0.25	0	0	0	#
chr6	32892307	-	NM_025336	Chchd3	CDS	0	0	0	80	11	0.138	0	0	0	#
chr6	34746088	+	uc009bhl.1	Cald1	startC	0	0	0	18	3	0.167	0	0	0	#
chr6	34746107	+	uc009bhl.1	Cald1	startC	0	0	0	30	3	0.1	0	0	0	#
chr6	34746135	+	uc009bhl.1	Cald1	startC	0	0	0	19	2	0.105	0	0	0	#
chr6	34755790	+	NM_145575	Cald1	CDS	0	0	0	60	11	0.183	0	0	0	#
chr6	35539593	-	NM_008098	Mtpn	startC	0	0	0	30	4	0.133	28	5	0.179	#
chr6	38743211	-	NM_010433	Hipk2	CDS	0	0	0	21	7	0.333	0	0	0	#
chr6	38875995	-	NM_010433	Hipk2	startC	0	0	0	16	2	0.125	0	0	0	#
chr6	39381437	+	NM_011226	Rab19	5UTR	0	0	0	12	3	0.25	0	0	0	#
chr6	40764238	+	NM_001171003	Mgam	CDS	0	0	0	63	12	0.19	57	11	0.193	#
chr6	40768815	+	NM_001171003	Mgam	3UTR	0	0	0	48	8	0.167	0	0	0	#
chr6	48908659	+	NM_029638	Aoc1	stopC	0	0	0	46	7	0.152	40	7	0.175	#
chr6	52737144	+	NM_025816	Tax1bp1	CDS	0	0	0	35	8	0.229	0	0	0	#
chr6	67277767	+	NM_025814	Serbp1	CDS	0	0	0	51	10	0.2	0	0	0	#
chr6	71579716	+	NM_025783	Chmp3	stopC	0	0	0	48	8	0.167	0	0	0	#
chr6	72611742	-	NM_009443	Tgoln1	3UTR	0	0	0	23	7	0.304	0	0	0	#
chr6	78372107	+	NM_011036	Reg3b	CDS	0	0	0	25	7	0.28	0	0	0	#
chr6	78466850	-	NM_011260	Reg3g	CDS	0	0	0	66	11	0.167	0	0	0	#
chr6	85069345	-	NM_177077	Exoc6b	startC	0	0	0	26	7	0.269	23	5	0.217	#
chr6	86651069	-	NM_010751	Mxd1	stopC	0	0	0	41	7	0.171	29	9	0.31	#
chr6	86748977	-	NM_013471	Anxa4	CDS	0	0	0	144	15	0.104	116	15	0.129	#
chr6	86753879	-	NM_013471	Anxa4	CDS	0	0	0	25	7	0.28	0	0	0	#
chr6	108660714	+	NM_011498	Bhlhe40	startC	0	0	0	19	2	0.105	0	0	0	#
chr6	120364676	+	NM_145997	Kdm5a	startC	0	0	0	12	2	0.167	0	0	0	#
chr6	124741226	-	ENSMUST00000004389	Grcc10	5UTR	0	0	0	12	10	0.833	10	7	0.7	#
chr6	124741228	-	ENSMUST00000004389	Grcc10	5UTR	0	0	0	13	11	0.846	0	0	0	#
chr6	124741259	-	ENSMUST00000004389	Grcc10	5UTR	0	0	0	15	13	0.867	0	0	0	#
chr6	124812665	-	NM_009415	Tpi1	CDS	0	0	0	11	7	0.636	14	7	0.5	#
chr6	124914204	-	NM_026988	Ptms	stopC	0	0	0	42	7	0.167	0	0	0	#
chr6	125067953	+	NM_001163269	Lpar5	5UTR	0	0	0	10	2	0.2	0	0	0	#
chr6	125122849	+	NM_145979	Chd4	CDS	0	0	0	18	8	0.444	0	0	0	#
chr6	125321527	+	NM_011324	Scnn1a	5UTR	0	0	0	25	3	0.12	0	0	0	#
chr6	128430810	-	NM_010219	Fkbp4	stopC	0	0	0	14	5	0.357	11	4	0.364	#
chr6	134920955	+	NM_009875	Cdkn1b	startC	0	0	0	29	3	0.103	32	4	0.125	#
chr6	134921040	+	NM_009875	Cdkn1b	startC	0	0	0	10	1	0.1	10	1	0.1	#
chr6	134921067	+	NM_009875	Cdkn1b	startC	0	0	0	16	2	0.125	0	0	0	#
chr6	138147660	+	NM_019946	Mgst1	startC	0	0	0	13	2	0.154	0	0	0	#
chr6	29768601	+	NM_021414	Ahcyl2	startC	0	0	0	0	0	0	17	2	0.118	#
chr6	29911528	+	NM_021414	Ahcyl2	3UTR	0	0	0	0	0	0	17	4	0.235	#
chr6	34746096	+	uc009bhl.1	Cald1	startC	0	0	0	0	0	0	19	2	0.105	#
chr6	39420143	-	NM_018810	Mkrn1	startC	0	0	0	0	0	0	12	3	0.25	#
chr6	40756345	+	NM_001171003	Mgam	CDS	0	0	0	0	0	0	38	9	0.237	#
chr6	40768931	+	NM_001171003	Mgam	3UTR	0	0	0	0	0	0	61	8	0.131	#
chr6	47577615	-	NM_007971	Ezh2	startC	0	0	0	0	0	0	10	2	0.2	#
chr6	51466144	-	NM_016806	Hnrnpa2b1	CDS	0	0	0	0	0	0	19	6	0.316	#
chr6	51470680	+	NM_007624	Cbx3	5UTR	0	0	0	0	0	0	12	2	0.167	#
chr6	54040097	+	NM_001163640	Chn2	startC	0	0	0	0	0	0	12	3	0.25	#
chr6	71199975	+	NM_017399	Fabp1	startC	0	0	0	0	0	0	10	1	0.1	#
chr6	71284697	+	NM_145568	Krcc1	stopC	0	0	0	0	0	0	51	7	0.137	#
chr6	71560977	+	NM_025783	Chmp3	CDS	0	0	0	0	0	0	12	6	0.5	#
chr6	78373316	+	NM_011036	Reg3b	stopC	0	0	0	0	0	0	23	5	0.217	#
chr6	83189677	+	NM_007835	Dctn1	CDS	0	0	0	0	0	0	51	10	0.196	#
chr6	86647256	-	NM_010751	Mxd1	3UTR	0	0	0	0	0	0	20	7	0.35	#
chr6	86668981	-	NM_010751	Mxd1	startC	0	0	0	0	0	0	10	1	0.1	#
chr6	86668997	-	NM_010751	Mxd1	startC	0	0	0	0	0	0	11	3	0.3	#
chr6	86737756	-	NM_013471	Anxa4	stopC	0	0	0	0	0	0	13	4	0.333	#
chr6	86765789	-	NM_013471	Anxa4	startC	0	0	0	0	0	0	38	4	0.105	#
chr6	87811461	-	NM_001039394	Rab43	startC	0	0	0	0	0	0	19	3	0.158	#
chr6	90559243	+	NM_027406	Aldh1l1	CDS	0	0	0	0	0	0	11	5	0.455	#
chr6	91173348	+	NM_144919	Hdac11	stopC	0	0	0	0	0	0	17	5	0.294	#
chr6	97168798	-	NM_001081111	Tmf1	CDS	0	0	0	0	0	0	25	8	0.32	#
chr6	108660706	+	NM_011498	Bhlhe40	5UTR	0	0	0	0	0	0	22	3	0.136	#
chr6	118383798	-	NM_194339	Bms1	stopC	0	0	0	0	0	0	22	5	0.227	#
chr6	119370272	-	NM_197985	Adipor2	startC	0	0	0	0	0	0	11	2	0.182	#
chr6	124741236	-	ENSMUST00000004389	Grcc10	5UTR	0	0	0	0	0	0	11	10	0.909	#
chr6	124914697	-	NM_026988	Ptms	CDS	0	0	0	0	0	0	111	15	0.136	#
chr6	131388170	-	NM_011733	Ybx3	startC	0	0	0	0	0	0	14	6	0.429	#
chr6	134920951	+	NM_009875	Cdkn1b	startC	0	0	0	0	0	0	29	3	0.103	#
chr6	136933739	-	NM_007486	Arhgdib	startC	0	0	0	0	0	0	10	2	0.2	#
chr6	140623853	+	NM_001005605	Aebp2	startC	0	0	0	0	0	0	10	4	0.4	#
chr7	4631989	-	NM_172894	Ppp6r1	3UTR	19	5	0.278	0	0	0	0	0	0	#
chr7	4636057	-	NM_172894	Ppp6r1	CDS	42	8	0.19	0	0	0	40	9	0.225	#
chr7	4658921	-	NM_172894	Ppp6r1	5UTR	15	3	0.2	17	2	0.118	19	3	0.158	0.158667
chr7	4877143	+	NM_001101598	Isoc2a	5UTR	14	2	0.143	16	2	0.125	10	2	0.2	0.156
chr7	5092936	+	NM_010147	Epn1	CDS	17	6	0.353	0	0	0	0	0	0	#
chr7	12922360	+	NM_009095	Rps5	5UTR	15	2	0.133	0	0	0	23	5	0.217	#
chr7	12923015	+	NM_009095	Rps5	startC	14	4	0.308	14	4	0.286	16	4	0.25	0.281333
chr7	12923058	+	NM_009095	Rps5	startC	12	3	0.25	0	0	0	15	2	0.133	#
chr7	13037633	-	NM_145578	Ube2m	startC	17	2	0.118	0	0	0	21	4	0.19	#
chr7	13037634	-	NM_145578	Ube2m	startC	18	2	0.111	0	0	0	0	0	0	#
chr7	13037639	-	NM_145578	Ube2m	startC	20	3	0.15	0	0	0	0	0	0	#
chr7	13037644	-	NM_145578	Ube2m	startC	17	5	0.294	22	8	0.364	19	4	0.211	0.289667
chr7	13037650	-	NM_145578	Ube2m	startC	23	4	0.174	23	5	0.217	24	5	0.208	0.199667
chr7	13037713	-	NM_145578	Ube2m	startC	36	5	0.139	0	0	0	0	0	0	#
chr7	16917118	-	NM_007590	Calm3	stopC	65	9	0.138	79	11	0.139	67	13	0.194	0.157
chr7	16917147	-	NM_007590	Calm3	stopC	78	11	0.141	94	10	0.106	87	14	0.161	0.136
chr7	16917425	-	NM_007590	Calm3	CDS	25	7	0.28	24	9	0.375	0	0	0	#
chr7	16923890	-	NM_007590	Calm3	startC	15	2	0.133	18	2	0.111	0	0	0	#
chr7	16923891	-	NM_007590	Calm3	startC	15	4	0.267	20	3	0.15	12	3	0.25	0.222333
chr7	16923897	-	NM_007590	Calm3	startC	19	2	0.105	23	4	0.174	13	3	0.231	0.17
chr7	16923900	-	NM_007590	Calm3	startC	19	2	0.105	24	3	0.125	14	2	0.143	0.124333
chr7	16923927	-	NM_007590	Calm3	startC	18	2	0.111	22	3	0.136	0	0	0	#
chr7	17027772	-	NM_011155	Ppp5c	startC	18	3	0.167	19	5	0.263	20	2	0.1	0.176667
chr7	17027796	-	NM_011155	Ppp5c	startC	16	2	0.125	14	2	0.143	12	2	0.167	0.145
chr7	19561978	-	NM_199149	Ppp1r37	startC	26	3	0.115	34	4	0.118	30	3	0.1	0.111
chr7	19671845	-	NM_001277944	Apoc2	stopC	10	4	0.4	0	0	0	0	0	0	#
chr7	19696745	-	NM_009696	Apoe	CDS	24	8	0.333	36	10	0.278	0	0	0	#
chr7	19698194	-	NM_009696	Apoe	startC	16	2	0.125	18	2	0.111	13	2	0.154	0.13
chr7	19698209	-	NM_009696	Apoe	startC	16	3	0.188	18	3	0.167	13	2	0.154	0.169667
chr7	19698214	-	NM_009696	Apoe	startC	17	3	0.176	18	2	0.111	0	0	0	#
chr7	19965438	+	NM_027839	Ceacam20	startC	10	3	0.3	14	2	0.143	11	2	0.182	0.208333
chr7	24370461	+	NM_008433	Kcnn4	startC	15	4	0.267	18	3	0.167	10	1	0.1	0.178
chr7	24370468	+	NM_008433	Kcnn4	startC	14	2	0.143	17	2	0.118	10	2	0.2	0.153667
chr7	24370470	+	NM_008433	Kcnn4	startC	13	2	0.154	17	3	0.176	10	1	0.1	0.143333
chr7	24888910	+	NM_023133	Rps19	CDS	88	17	0.195	110	22	0.2	91	24	0.264	0.219667
chr7	25271005	+	NM_001302811	Cic	startC	12	5	0.417	11	4	0.364	10	4	0.4	0.393667
chr7	25477576	-	NM_011926	Ceacam1	startC	10	1	0.1	16	2	0.125	0	0	0	#
chr7	28085092	+	NM_001122603	Fcgbp	CDS	115	17	0.149	132	20	0.153	116	19	0.165	0.155667
chr7	28085096	+	NM_001122603	Fcgbp	CDS	110	16	0.147	133	30	0.227	115	21	0.184	0.186
chr7	28086638	+	NM_001122603	Fcgbp	CDS	76	11	0.145	0	0	0	0	0	0	#
chr7	28086672	+	NM_001122603	Fcgbp	CDS	99	12	0.121	123	18	0.146	98	15	0.153	0.14
chr7	28086689	+	NM_001122603	Fcgbp	CDS	269	43	0.16	305	40	0.132	272	33	0.121	0.137667
chr7	28093348	+	NM_001122603	Fcgbp	CDS	68	11	0.162	0	0	0	0	0	0	#
chr7	28093494	+	NM_001122603	Fcgbp	CDS	67	12	0.179	0	0	0	0	0	0	#
chr7	28093512	+	NM_001122603	Fcgbp	CDS	40	8	0.2	0	0	0	0	0	0	#
chr7	28103688	+	NM_001122603	Fcgbp	CDS	88	11	0.125	0	0	0	93	12	0.129	#
chr7	28106292	+	NM_001122603	Fcgbp	CDS	150	23	0.153	172	27	0.157	149	21	0.141	0.150333
chr7	28106334	+	NM_001122603	Fcgbp	CDS	85	15	0.176	94	14	0.149	0	0	0	#
chr7	28107172	+	NM_001122603	Fcgbp	CDS	16	7	0.438	19	12	0.632	16	7	0.438	0.502667
chr7	28330589	-	NM_013676	Supt5	CDS	52	10	0.192	0	0	0	0	0	0	#
chr7	28810974	+	NM_177301	Hnrnpl	startC	29	4	0.138	35	4	0.114	24	3	0.125	0.125667
chr7	28810979	+	NM_177301	Hnrnpl	startC	29	3	0.103	33	4	0.121	25	5	0.2	0.141333
chr7	28835939	+	NM_010706	Lgals4	CDS	249	26	0.106	280	28	0.101	245	32	0.131	0.112667
chr7	28835947	+	NM_010706	Lgals4	CDS	242	35	0.145	269	38	0.141	235	35	0.149	0.145
chr7	28840883	+	NM_010706	Lgals4	CDS	52	11	0.212	55	11	0.2	55	11	0.204	0.205333
chr7	28840885	+	NM_010706	Lgals4	CDS	54	13	0.241	57	12	0.211	53	12	0.226	0.226
chr7	28841255	+	NM_010706	Lgals4	CDS	201	22	0.109	225	24	0.107	200	22	0.11	0.108667
chr7	28841664	+	NM_010706	Lgals4	stopC	22	5	0.227	0	0	0	0	0	0	#
chr7	28902018	-	NM_021895	Actn4	CDS	23	7	0.304	24	7	0.292	0	0	0	#
chr7	28904658	-	NM_021895	Actn4	CDS	45	10	0.222	54	12	0.222	0	0	0	#
chr7	28905350	-	NM_021895	Actn4	CDS	38	11	0.289	0	0	0	34	8	0.235	#
chr7	28962081	-	NM_021895	Actn4	startC	17	3	0.176	0	0	0	0	0	0	#
chr7	28962082	-	NM_021895	Actn4	startC	17	2	0.125	13	2	0.154	14	3	0.214	0.164333
chr7	28962171	-	NM_021895	Actn4	startC	11	3	0.273	24	3	0.13	0	0	0	#
chr7	28962187	-	NM_021895	Actn4	startC	14	2	0.143	16	2	0.125	21	3	0.143	0.137
chr7	28962190	-	NM_021895	Actn4	startC	12	3	0.25	15	2	0.133	17	2	0.118	0.167
chr7	29247603	-	NM_028179	2200002D01Rik	stopC	46	7	0.152	45	7	0.156	0	0	0	#
chr7	29247724	-	NM_028179	2200002D01Rik	stopC	30	6	0.2	38	7	0.184	0	0	0	#
chr7	29256666	-	NM_011464	Spint2	stopC	31	7	0.226	31	6	0.194	0	0	0	#
chr7	29281685	-	NM_011464	Spint2	startC	10	1	0.1	17	3	0.188	15	3	0.2	0.162667
chr7	29281687	-	NM_011464	Spint2	startC	13	4	0.308	18	4	0.222	19	3	0.158	0.229333
chr7	29281698	-	NM_011464	Spint2	startC	16	2	0.125	22	4	0.182	24	3	0.125	0.144
chr7	29281709	-	NM_011464	Spint2	startC	17	3	0.176	25	3	0.12	25	3	0.12	0.138667
chr7	29281710	-	NM_011464	Spint2	startC	17	5	0.294	25	6	0.24	25	4	0.16	0.231333
chr7	29281713	-	NM_011464	Spint2	startC	18	3	0.167	24	3	0.125	25	6	0.24	0.177333
chr7	29281721	-	NM_011464	Spint2	startC	17	4	0.235	23	3	0.13	17	5	0.294	0.219667
chr7	29281729	-	NM_011464	Spint2	startC	16	3	0.188	20	2	0.1	15	2	0.133	0.140333
chr7	29281736	-	NM_011464	Spint2	startC	12	2	0.167	19	2	0.105	0	0	0	#
chr7	29281743	-	NM_011464	Spint2	startC	12	2	0.167	11	3	0.273	12	2	0.167	0.202333
chr7	29281852	-	NM_011464	Spint2	5UTR	18	5	0.278	20	4	0.2	19	4	0.211	0.229667
chr7	29281862	-	NM_011464	Spint2	5UTR	16	2	0.125	17	2	0.118	18	2	0.111	0.118
chr7	30193988	-	NM_009795	Capns1	startC	10	1	0.1	11	2	0.182	13	3	0.231	0.171
chr7	30193996	-	NM_009795	Capns1	startC	10	2	0.2	0	0	0	13	2	0.154	#
chr7	30194003	-	NM_009795	Capns1	startC	10	1	0.1	11	2	0.182	14	2	0.143	0.141667
chr7	30194005	-	NM_009795	Capns1	startC	10	4	0.4	13	2	0.154	12	6	0.5	0.351333
chr7	30322055	+	ENSMUST00000098585	E130208F15Rik	startC	10	1	0.1	0	0	0	0	0	0	#
chr7	30322263	-	NM_001033140	Sdhaf1	startC	24	7	0.292	23	11	0.478	22	7	0.318	0.362667
chr7	30322270	-	NM_001033140	Sdhaf1	startC	25	5	0.2	27	4	0.148	22	3	0.136	0.161333
chr7	30322272	-	NM_001033140	Sdhaf1	startC	24	3	0.125	25	3	0.12	23	4	0.174	0.139667
chr7	30973128	-	NM_017405	Lsr	startC	11	2	0.182	13	4	0.308	11	4	0.364	0.284667
chr7	30973133	-	NM_017405	Lsr	startC	12	3	0.25	16	2	0.125	14	2	0.143	0.172667
chr7	30973140	-	NM_017405	Lsr	startC	12	3	0.25	16	2	0.125	12	2	0.167	0.180667
chr7	30973148	-	NM_017405	Lsr	startC	13	2	0.154	18	3	0.167	14	3	0.214	0.178333
chr7	30973156	-	NM_017405	Lsr	startC	14	2	0.143	16	2	0.125	13	2	0.154	0.140667
chr7	34141330	-	NM_016682	Uba2	stopC	10	4	0.4	13	5	0.385	13	4	0.308	0.364333
chr7	35120926	+	NM_007678	Cebpa	3UTR	27	5	0.185	25	6	0.24	0	0	0	#
chr7	35449814	+	NM_021291	Slc7a9	startC	15	3	0.2	0	0	0	0	0	0	#
chr7	35449824	+	NM_021291	Slc7a9	startC	14	2	0.143	18	2	0.111	0	0	0	#
chr7	38019404	-	NM_011274	Uri1	startC	11	3	0.273	20	5	0.25	17	2	0.118	0.213667
chr7	43444135	+	NM_026695	Etfb	startC	10	2	0.2	0	0	0	0	0	0	#
chr7	43444138	+	NM_026695	Etfb	startC	10	2	0.2	19	2	0.105	10	3	0.3	0.201667
chr7	44247406	+	uc009gos.2	2410002F23Rik	5UTR	13	2	0.167	19	4	0.211	14	2	0.143	0.173667
chr7	44250471	+	uc009goy.1	Snord88a	5UTR	12	4	0.333	13	4	0.308	10	4	0.4	0.347
chr7	44250473	+	uc009goy.1	Snord88a	startC	13	5	0.385	12	5	0.417	10	5	0.5	0.434
chr7	44250478	+	uc009goy.1	Snord88a	startC	14	7	0.5	14	9	0.643	13	7	0.538	0.560333
chr7	44250480	+	uc009goy.1	Snord88a	startC	13	5	0.385	17	5	0.294	14	5	0.357	0.345333
chr7	44250484	+	uc009goy.1	Snord88a	startC	20	4	0.2	26	6	0.231	20	4	0.2	0.210333
chr7	44250485	+	uc009goy.1	Snord88a	startC	23	5	0.217	25	5	0.2	23	5	0.217	0.211333
chr7	44250487	+	uc009goy.1	Snord88a	startC	29	4	0.138	32	5	0.156	29	4	0.138	0.144
chr7	44250488	+	uc009goy.1	Snord88a	startC	31	5	0.161	34	5	0.147	27	3	0.111	0.139667
chr7	44250515	+	uc009goy.1	Snord88a	startC	82	13	0.159	82	11	0.134	78	9	0.115	0.136
chr7	44615386	-	NM_028021	Myh14	CDS	55	9	0.164	62	12	0.194	0	0	0	#
chr7	44615434	-	NM_028021	Myh14	CDS	26	7	0.269	0	0	0	0	0	0	#
chr7	44621791	-	NM_028021	Myh14	CDS	48	9	0.188	0	0	0	0	0	0	#
chr7	44624152	-	NM_028021	Myh14	CDS	11	5	0.455	0	0	0	0	0	0	#
chr7	44628578	-	NM_028021	Myh14	CDS	84	13	0.155	103	14	0.136	88	15	0.172	0.154333
chr7	44628583	-	NM_028021	Myh14	CDS	88	18	0.205	114	15	0.132	107	23	0.215	0.184
chr7	44629928	-	NM_028021	Myh14	CDS	58	10	0.172	0	0	0	0	0	0	#
chr7	44630734	-	NM_028021	Myh14	CDS	48	10	0.208	0	0	0	40	8	0.205	#
chr7	44816458	+	NM_053074	Nup62	5UTR	10	3	0.3	13	2	0.154	11	2	0.182	0.212
chr7	44816467	+	NM_053074	Nup62	5UTR	12	2	0.167	12	2	0.167	12	2	0.167	0.167
chr7	45103709	-	NM_010189	Fcgrt	5UTR	20	3	0.15	19	2	0.105	18	4	0.222	0.159
chr7	45103719	-	NM_010189	Fcgrt	5UTR	21	4	0.19	21	6	0.286	20	2	0.1	0.192
chr7	45126628	-	uc009gtj.2	Rpl13a	CDS	10	5	0.5	0	0	0	0	0	0	#
chr7	45126630	-	uc009gtj.2	Rpl13a	CDS	10	6	0.6	14	8	0.571	0	0	0	#
chr7	45127395	-	uc009gtj.2	Rpl13a	5UTR	14	10	0.714	0	0	0	16	13	0.812	#
chr7	45127396	-	uc009gtj.2	Rpl13a	5UTR	14	10	0.714	10	4	0.4	15	12	0.8	0.638
chr7	45127398	-	uc009gtj.2	Rpl13a	5UTR	14	10	0.714	10	4	0.4	16	13	0.812	0.642
chr7	45127403	-	uc009gtj.2	Rpl13a	5UTR	14	10	0.714	10	4	0.4	15	13	0.867	0.660333
chr7	45127404	-	uc009gtj.2	Rpl13a	5UTR	14	11	0.786	10	5	0.5	16	13	0.812	0.699333
chr7	45127407	-	uc009gtj.2	Rpl13a	5UTR	13	8	0.615	0	0	0	0	0	0	#
chr7	45147308	-	NM_145954	Aldh16a1	CDS	17	6	0.353	0	0	0	0	0	0	#
chr7	45322122	-	NM_175130	Trpm4	CDS	26	7	0.269	0	0	0	0	0	0	#
chr7	45395544	-	NM_009224	Snrnp70	5UTR	20	2	0.1	0	0	0	19	4	0.211	#
chr7	45395553	-	NM_009224	Snrnp70	5UTR	18	2	0.111	15	2	0.133	0	0	0	#
chr7	45495276	-	NM_008749	Nucb1	CDS	110	12	0.109	138	14	0.101	97	13	0.134	0.114667
chr7	46221394	-	NM_023649	Ush1c	CDS	45	10	0.227	0	0	0	0	0	0	#
chr7	46919851	-	NM_021884	Tsg101	startC	10	2	0.2	16	2	0.125	15	2	0.133	0.152667
chr7	60005053	-	NM_013670	Snrpn	5UTR	17	2	0.118	0	0	0	0	0	0	#
chr7	60005071	-	NM_013670	Snrpn	5UTR	18	3	0.167	0	0	0	20	3	0.15	#
chr7	65370829	-	NM_009386	Tjp1	startC	11	2	0.182	18	2	0.111	0	0	0	#
chr7	68739238	-	NM_001042592	Arrdc4	3UTR	25	5	0.2	0	0	0	0	0	0	#
chr7	79821965	-	NM_008486	Anpep	3UTR	34	8	0.235	41	11	0.268	31	9	0.29	0.264333
chr7	79822281	-	NM_008486	Anpep	stopC	319	40	0.125	384	44	0.115	343	46	0.134	0.124667
chr7	79822319	-	NM_008486	Anpep	stopC	102	13	0.127	0	0	0	106	16	0.151	#
chr7	79826915	-	NM_008486	Anpep	CDS	128	14	0.109	153	16	0.105	124	13	0.105	0.106333
chr7	79826920	-	NM_008486	Anpep	CDS	142	25	0.177	162	17	0.105	132	15	0.115	0.132333
chr7	79838956	-	NM_008486	Anpep	CDS	62	14	0.23	72	12	0.171	65	16	0.246	0.215667
chr7	79838976	-	NM_008486	Anpep	CDS	35	8	0.229	35	8	0.229	40	10	0.25	0.236
chr7	79841815	-	NM_008486	Anpep	CDS	106	12	0.113	125	15	0.12	0	0	0	#
chr7	79842156	-	NM_008486	Anpep	startC	14	3	0.214	10	1	0.1	14	2	0.143	0.152333
chr7	79842177	-	NM_008486	Anpep	startC	16	2	0.125	17	2	0.118	14	2	0.143	0.128667
chr7	79927655	-	NM_027420	2610034B18Rik	CDS	18	7	0.389	23	8	0.348	0	0	0	#
chr7	81344378	-	NM_009092	Rps17	CDS	105	19	0.181	128	17	0.134	110	17	0.155	0.156667
chr7	81706783	-	NM_011983	Homer2	startC	10	2	0.2	13	3	0.231	14	3	0.214	0.215
chr7	83755974	+	ENSMUST00000042280	Gm7964	startC	29	3	0.103	34	4	0.118	30	3	0.1	0.107
chr7	84151848	-	NM_133722	Abhd17c	startC	10	1	0.1	13	2	0.154	13	2	0.154	0.136
chr7	84151857	-	NM_133722	Abhd17c	startC	10	1	0.1	0	0	0	13	2	0.154	#
chr7	84151859	-	NM_133722	Abhd17c	startC	10	1	0.1	12	2	0.167	13	3	0.231	0.166
chr7	90130557	+	NM_146194	Picalm	startC	22	5	0.227	23	5	0.217	21	5	0.238	0.227333
chr7	90130565	+	NM_146194	Picalm	startC	22	3	0.136	26	4	0.154	23	7	0.304	0.198
chr7	90130592	+	NM_146194	Picalm	startC	21	3	0.143	26	5	0.192	21	3	0.143	0.159333
chr7	90130596	+	NM_146194	Picalm	startC	13	3	0.231	16	2	0.125	15	4	0.267	0.207667
chr7	90207927	+	NM_146194	Picalm	3UTR	56	8	0.143	0	0	0	0	0	0	#
chr7	97081868	+	NM_010248	Gab2	startC	17	4	0.235	17	3	0.176	18	3	0.167	0.192667
chr7	97081885	+	NM_010248	Gab2	startC	13	3	0.231	12	3	0.25	13	3	0.231	0.237333
chr7	98077757	-	NM_008663	Myo7a	CDS	23	12	0.522	23	10	0.435	18	9	0.5	0.485667
chr7	99479571	-	uc009ils.1	Rps3	3UTR	20	6	0.3	22	9	0.409	18	7	0.389	0.366
chr7	99479578	-	uc009ils.1	Rps3	3UTR	21	9	0.429	21	8	0.4	19	8	0.421	0.416667
chr7	99479594	-	uc009ils.1	Rps3	3UTR	23	7	0.304	24	10	0.417	22	9	0.409	0.376667
chr7	99479596	-	uc009ils.1	Rps3	3UTR	21	7	0.333	23	9	0.391	21	10	0.476	0.4
chr7	99479598	-	uc009ils.1	Rps3	3UTR	18	6	0.333	20	9	0.45	19	9	0.474	0.419
chr7	99479601	-	uc009ils.1	Rps3	3UTR	18	7	0.389	18	8	0.444	17	8	0.471	0.434667
chr7	99479602	-	uc009ils.1	Rps3	3UTR	19	7	0.368	15	9	0.6	16	9	0.6	0.522667
chr7	99479611	-	uc009ils.1	Rps3	3UTR	13	7	0.538	11	7	0.636	13	8	0.615	0.596333
chr7	99479616	-	uc009ils.1	Rps3	3UTR	13	7	0.538	11	7	0.636	15	10	0.667	0.613667
chr7	99479617	-	uc009ils.1	Rps3	3UTR	12	7	0.583	12	8	0.667	12	7	0.583	0.611
chr7	99479618	-	uc009ils.1	Rps3	3UTR	11	8	0.727	11	8	0.727	12	9	0.75	0.734667
chr7	99479638	-	uc009ils.1	Rps3	3UTR	10	7	0.7	0	0	0	0	0	0	#
chr7	99479662	-	uc009ils.1	Rps3	3UTR	12	7	0.583	11	8	0.727	12	9	0.75	0.686667
chr7	99479664	-	uc009ils.1	Rps3	3UTR	12	6	0.5	11	6	0.545	11	7	0.636	0.560333
chr7	99479668	-	uc009ils.1	Rps3	3UTR	16	6	0.375	17	6	0.353	17	8	0.471	0.399667
chr7	99479671	-	uc009ils.1	Rps3	3UTR	17	6	0.353	16	6	0.375	18	9	0.5	0.409333
chr7	99479673	-	uc009ils.1	Rps3	3UTR	18	5	0.278	19	5	0.263	19	8	0.421	0.320667
chr7	99479674	-	uc009ils.1	Rps3	3UTR	18	6	0.333	19	6	0.316	19	9	0.474	0.374333
chr7	99479682	-	uc009ils.1	Rps3	3UTR	27	7	0.259	30	8	0.267	25	9	0.36	0.295333
chr7	99479687	-	uc009ils.1	Rps3	3UTR	36	9	0.25	39	11	0.282	35	11	0.314	0.282
chr7	99479693	-	uc009ils.1	Rps3	3UTR	35	8	0.229	39	10	0.256	35	11	0.314	0.266333
chr7	99479695	-	uc009ils.1	Rps3	3UTR	32	6	0.188	40	9	0.225	35	9	0.257	0.223333
chr7	99479704	-	uc009ils.1	Rps3	3UTR	36	7	0.194	40	6	0.15	35	8	0.229	0.191
chr7	99483628	-	NM_012052	Rps3	startC	68	10	0.147	83	10	0.12	64	12	0.188	0.151667
chr7	102468394	+	NM_009103	Rrm1	stopC	20	5	0.25	25	8	0.32	0	0	0	#
chr7	105809809	-	NM_025301	Mrpl17	stopC	13	4	0.308	0	0	0	0	0	0	#
chr7	116418424	-	NM_011083	Pik3c2a	startC	11	2	0.182	0	0	0	10	2	0.2	#
chr7	118135132	-	NM_001031814	Smg1	3UTR	23	5	0.217	0	0	0	0	0	0	#
chr7	120182423	+	NM_028085	Anks4b	CDS	120	14	0.118	146	15	0.103	0	0	0	#
chr7	120182430	+	NM_028085	Anks4b	CDS	121	20	0.165	147	29	0.197	111	18	0.162	0.174667
chr7	120182446	+	NM_028085	Anks4b	CDS	108	12	0.111	0	0	0	0	0	0	#
chr7	120940482	+	NM_025298	Polr3e	CDS	17	7	0.412	0	0	0	0	0	0	#
chr7	120982023	-	NM_007672	Cdr2	startC	10	1	0.1	10	2	0.2	0	0	0	#
chr7	127050461	-	NM_026918	Zg16	stopC	26	6	0.231	0	0	0	0	0	0	#
chr7	127050503	-	NM_026918	Zg16	CDS	40	9	0.225	46	13	0.283	0	0	0	#
chr7	127489503	+	NM_010183	Fbrs	CDS	49	12	0.245	0	0	0	44	11	0.25	#
chr7	127708460	-	NM_009746	Bcl7c	startC	13	5	0.385	13	3	0.231	14	3	0.214	0.276667
chr7	127993518	-	NM_023258	Pycard	startC	13	2	0.154	0	0	0	0	0	0	#
chr7	127993800	-	NM_023258	Pycard	startC	25	4	0.16	0	0	0	0	0	0	#
chr7	131106286	+	NM_007769	Dmbt1	CDS	25	8	0.32	0	0	0	0	0	0	#
chr7	131109614	+	NM_007769	Dmbt1	CDS	98	14	0.143	102	12	0.118	91	14	0.154	0.138333
chr7	131121396	+	NM_007769	Dmbt1	stopC	31	6	0.194	36	8	0.222	31	6	0.194	0.203333
chr7	140857479	+	NM_053194	Ric8	startC	18	2	0.111	13	2	0.154	10	2	0.2	0.155
chr7	140923858	+	NM_133946	Nlrp6	CDS	45	9	0.2	0	0	0	0	0	0	#
chr7	140923869	+	NM_133946	Nlrp6	CDS	61	11	0.18	0	0	0	65	11	0.169	#
chr7	140955825	-	NM_030694	Ifitm2	startC	15	2	0.133	0	0	0	0	0	0	#
chr7	141010557	-	NM_025378	Ifitm3	startC	18	4	0.222	28	5	0.179	22	3	0.136	0.179
chr7	141079809	+	NM_019762	Pkp3	startC	15	3	0.2	19	4	0.211	21	5	0.238	0.216333
chr7	141079818	+	NM_019762	Pkp3	startC	15	2	0.133	18	3	0.167	18	5	0.278	0.192667
chr7	141269249	-	NM_028069	Cdhr5	stopC	34	6	0.176	0	0	0	0	0	0	#
chr7	141269285	-	NM_028069	Cdhr5	stopC	18	7	0.389	30	9	0.3	0	0	0	#
chr7	141269312	-	NM_028069	Cdhr5	stopC	28	6	0.214	25	6	0.24	0	0	0	#
chr7	141356369	+	NM_133191	Eps8l2	CDS	45	10	0.222	0	0	0	0	0	0	#
chr7	141694933	+	NM_023566	Muc2	CDS	28	8	0.286	0	0	0	29	7	0.241	#
chr7	141700829	+	uc029wpr.2	Muc2	CDS	49	9	0.184	57	10	0.175	0	0	0	#
chr7	141749744	+	NM_023566	Muc2	CDS	118	13	0.11	0	0	0	0	0	0	#
chr7	141754392	+	NM_023566	Muc2	stopC	24	8	0.333	0	0	0	0	0	0	#
chr7	141754423	+	NM_023566	Muc2	stopC	13	6	0.462	0	0	0	0	0	0	#
chr7	144441711	-	NM_007803	Cttn	CDS	79	13	0.165	77	17	0.221	0	0	0	#
chr7	144441713	-	NM_007803	Cttn	CDS	81	15	0.185	0	0	0	0	0	0	#
chr7	144441769	-	NM_007803	Cttn	CDS	79	12	0.152	0	0	0	78	12	0.154	#
chr7	4633759	-	NM_172894	Ppp6r1	CDS	0	0	0	28	7	0.25	0	0	0	#
chr7	12922339	+	NM_009095	Rps5	5UTR	0	0	0	18	3	0.167	0	0	0	#
chr7	16916425	-	NM_007590	Calm3	3UTR	0	0	0	25	5	0.2	18	5	0.278	#
chr7	16916430	-	NM_007590	Calm3	3UTR	0	0	0	24	5	0.208	0	0	0	#
chr7	16917110	-	NM_007590	Calm3	stopC	0	0	0	34	7	0.206	0	0	0	#
chr7	16923920	-	NM_007590	Calm3	startC	0	0	0	25	3	0.12	0	0	0	#
chr7	19696738	-	NM_009696	Apoe	CDS	0	0	0	35	9	0.257	27	7	0.259	#
chr7	25911658	+	NM_009999	Cyp2b10	CDS	0	0	0	49	9	0.184	43	10	0.233	#
chr7	28101235	+	NM_001122603	Fcgbp	CDS	0	0	0	39	9	0.231	35	8	0.229	#
chr7	28101404	+	NM_001122603	Fcgbp	CDS	0	0	0	15	7	0.467	0	0	0	#
chr7	28103876	+	NM_001122603	Fcgbp	CDS	0	0	0	69	11	0.159	0	0	0	#
chr7	28106327	+	NM_001122603	Fcgbp	CDS	0	0	0	106	15	0.142	91	14	0.154	#
chr7	28106580	+	NM_001122603	Fcgbp	CDS	0	0	0	28	7	0.25	0	0	0	#
chr7	28106591	+	NM_001122603	Fcgbp	CDS	0	0	0	25	7	0.28	0	0	0	#
chr7	28331480	-	NM_013676	Supt5	CDS	0	0	0	26	8	0.32	0	0	0	#
chr7	28811080	+	NM_177301	Hnrnpl	startC	0	0	0	13	4	0.308	0	0	0	#
chr7	28840897	+	NM_010706	Lgals4	CDS	0	0	0	33	10	0.303	31	9	0.29	#
chr7	28893421	-	NM_021895	Actn4	3UTR	0	0	0	16	5	0.312	0	0	0	#
chr7	30973139	-	NM_017405	Lsr	startC	0	0	0	16	2	0.125	13	2	0.154	#
chr7	35449844	+	NM_021291	Slc7a9	startC	0	0	0	12	2	0.167	0	0	0	#
chr7	38019393	-	NM_011274	Uri1	startC	0	0	0	20	4	0.2	0	0	0	#
chr7	38271227	-	NM_025390	Pop4	startC	0	0	0	19	3	0.158	0	0	0	#
chr7	43457617	+	NM_026695	Etfb	stopC	0	0	0	45	8	0.178	37	8	0.216	#
chr7	44614301	-	NM_028021	Myh14	CDS	0	0	0	59	11	0.186	0	0	0	#
chr7	44621750	-	NM_028021	Myh14	CDS	0	0	0	43	12	0.286	0	0	0	#
chr7	44621779	-	NM_028021	Myh14	CDS	0	0	0	50	9	0.18	0	0	0	#
chr7	44625437	-	NM_028021	Myh14	CDS	0	0	0	49	11	0.224	0	0	0	#
chr7	44627088	-	NM_028021	Myh14	CDS	0	0	0	21	7	0.333	17	7	0.412	#
chr7	44665333	-	NM_028021	Myh14	startC	0	0	0	10	2	0.2	0	0	0	#
chr7	45377208	-	NM_009224	Snrnp70	CDS	0	0	0	19	6	0.316	0	0	0	#
chr7	45377235	-	NM_009224	Snrnp70	CDS	0	0	0	37	9	0.243	0	0	0	#
chr7	45380769	-	NM_009224	Snrnp70	CDS	0	0	0	17	6	0.353	0	0	0	#
chr7	45395534	-	NM_009224	Snrnp70	5UTR	0	0	0	16	2	0.125	0	0	0	#
chr7	46229576	-	NM_023649	Ush1c	CDS	0	0	0	28	8	0.286	0	0	0	#
chr7	65340272	-	NM_009386	Tjp1	CDS	0	0	0	35	9	0.257	0	0	0	#
chr7	66079733	+	NM_024439	Vimp	startC	0	0	0	10	2	0.2	11	2	0.182	#
chr7	67372738	-	NM_001033713	Mef2a	5UTR	0	0	0	10	1	0.1	0	0	0	#
chr7	68739237	-	NM_001042592	Arrdc4	3UTR	0	0	0	31	9	0.29	0	0	0	#
chr7	79821949	-	NM_008486	Anpep	3UTR	0	0	0	21	5	0.238	0	0	0	#
chr7	79839267	-	NM_008486	Anpep	CDS	0	0	0	37	11	0.297	0	0	0	#
chr7	79841684	-	NM_008486	Anpep	CDS	0	0	0	81	12	0.148	79	11	0.139	#
chr7	79841746	-	NM_008486	Anpep	CDS	0	0	0	87	16	0.184	77	13	0.169	#
chr7	81706780	-	NM_011983	Homer2	startC	0	0	0	12	2	0.167	0	0	0	#
chr7	81859419	+	NM_145375	Tm6sf1	startC	0	0	0	10	1	0.1	10	1	0.1	#
chr7	97550685	-	NM_183251	Aamdc	stopC	0	0	0	11	4	0.364	0	0	0	#
chr7	97788963	+	uc009iju.1	Pak1	5UTR	0	0	0	12	2	0.167	0	0	0	#
chr7	99346105	-	NM_009825	Serpinh1	stopC	0	0	0	22	7	0.318	13	5	0.385	#
chr7	102468443	+	NM_009103	Rrm1	stopC	0	0	0	11	4	0.364	0	0	0	#
chr7	118488514	-	NM_001033380	Itpripl2	3UTR	0	0	0	25	6	0.24	0	0	0	#
chr7	127993535	-	NM_023258	Pycard	startC	0	0	0	14	2	0.143	19	2	0.105	#
chr7	127993537	-	NM_023258	Pycard	startC	0	0	0	12	2	0.167	0	0	0	#
chr7	127993806	-	NM_023258	Pycard	startC	0	0	0	24	3	0.125	0	0	0	#
chr7	132558012	-	NM_016978	Oat	stopC	0	0	0	36	8	0.222	34	7	0.206	#
chr7	132567230	-	NM_016978	Oat	CDS	0	0	0	15	6	0.4	0	0	0	#
chr7	140927569	+	NM_133946	Nlrp6	stopC	0	0	0	35	7	0.2	29	6	0.207	#
chr7	141079797	+	NM_019762	Pkp3	startC	0	0	0	19	3	0.158	0	0	0	#
chr7	141699537	+	NM_023566	Muc2	CDS	0	0	0	25	7	0.28	0	0	0	#
chr7	4481866	-	NM_029834	Ppp1r12c	3UTR	0	0	0	0	0	0	12	4	0.333	#
chr7	12922344	+	NM_009095	Rps5	5UTR	0	0	0	0	0	0	20	3	0.15	#
chr7	12922998	+	NM_009095	Rps5	startC	0	0	0	0	0	0	12	2	0.167	#
chr7	12923054	+	NM_009095	Rps5	startC	0	0	0	0	0	0	18	4	0.222	#
chr7	13037724	-	NM_145578	Ube2m	startC	0	0	0	0	0	0	40	4	0.1	#
chr7	16416942	+	NM_198631	Zc3h4	CDS	0	0	0	0	0	0	25	7	0.28	#
chr7	16923925	-	NM_007590	Calm3	startC	0	0	0	0	0	0	18	2	0.111	#
chr7	28091637	+	NM_001122603	Fcgbp	CDS	0	0	0	0	0	0	39	10	0.256	#
chr7	28841174	+	NM_010706	Lgals4	CDS	0	0	0	0	0	0	18	6	0.333	#
chr7	28904665	-	NM_021895	Actn4	CDS	0	0	0	0	0	0	41	10	0.244	#
chr7	28962201	-	NM_021895	Actn4	startC	0	0	0	0	0	0	16	4	0.25	#
chr7	29247602	-	NM_028179	2200002D01Rik	stopC	0	0	0	0	0	0	28	6	0.214	#
chr7	29247704	-	NM_028179	2200002D01Rik	stopC	0	0	0	0	0	0	41	7	0.171	#
chr7	30193997	-	NM_009795	Capns1	startC	0	0	0	0	0	0	13	2	0.154	#
chr7	35120924	+	NM_007678	Cebpa	3UTR	0	0	0	0	0	0	22	5	0.227	#
chr7	35449815	+	NM_021291	Slc7a9	startC	0	0	0	0	0	0	14	3	0.214	#
chr7	38019418	-	NM_011274	Uri1	startC	0	0	0	0	0	0	15	2	0.133	#
chr7	44247403	+	uc009gos.2	2410002F23Rik	5UTR	0	0	0	0	0	0	15	2	0.133	#
chr7	44628541	-	NM_028021	Myh14	CDS	0	0	0	0	0	0	27	7	0.259	#
chr7	45103695	-	NM_010189	Fcgrt	5UTR	0	0	0	0	0	0	13	3	0.231	#
chr7	45103731	-	NM_010189	Fcgrt	5UTR	0	0	0	0	0	0	19	3	0.158	#
chr7	45127402	-	uc009gtj.2	Rpl13a	5UTR	0	0	0	0	0	0	15	13	0.867	#
chr7	45376815	-	NM_009224	Snrnp70	CDS	0	0	0	0	0	0	16	6	0.375	#
chr7	45395552	-	NM_009224	Snrnp70	5UTR	0	0	0	0	0	0	16	2	0.125	#
chr7	46220488	-	NM_023649	Ush1c	CDS	0	0	0	0	0	0	139	14	0.101	#
chr7	46221409	-	NM_023649	Ush1c	CDS	0	0	0	0	0	0	20	7	0.35	#
chr7	46238475	-	NM_023649	Ush1c	startC	0	0	0	0	0	0	10	1	0.1	#
chr7	46850977	+	NM_010699	Ldha	CDS	0	0	0	0	0	0	38	8	0.211	#
chr7	79821953	-	NM_008486	Anpep	3UTR	0	0	0	0	0	0	29	5	0.172	#
chr7	79841202	-	NM_008486	Anpep	CDS	0	0	0	0	0	0	35	9	0.257	#
chr7	79841768	-	NM_008486	Anpep	CDS	0	0	0	0	0	0	51	14	0.275	#
chr7	79841829	-	NM_008486	Anpep	CDS	0	0	0	0	0	0	225	29	0.129	#
chr7	79842169	-	NM_008486	Anpep	startC	0	0	0	0	0	0	11	2	0.182	#
chr7	81706774	-	NM_011983	Homer2	startC	0	0	0	0	0	0	15	2	0.133	#
chr7	81859406	+	NM_145375	Tm6sf1	startC	0	0	0	0	0	0	10	1	0.1	#
chr7	81859408	+	NM_145375	Tm6sf1	startC	0	0	0	0	0	0	10	1	0.1	#
chr7	83755969	+	ENSMUST00000042280	Gm7964	startC	0	0	0	0	0	0	32	5	0.156	#
chr7	97081864	+	NM_010248	Gab2	startC	0	0	0	0	0	0	18	2	0.111	#
chr7	97400264	+	NM_024220	Ndufc2	startC	0	0	0	0	0	0	10	1	0.1	#
chr7	98077178	-	NM_008663	Myo7a	CDS	0	0	0	0	0	0	17	6	0.353	#
chr7	99238596	-	NM_177448	Mogat2	startC	0	0	0	0	0	0	10	1	0.1	#
chr7	100182890	+	NM_001190870	Kcne3	5UTR	0	0	0	0	0	0	15	3	0.2	#
chr7	102080562	+	NM_011644	Xntrpc	CDS	0	0	0	0	0	0	12	5	0.417	#
chr7	118120282	-	NM_019419	Arl6ip1	stopC	0	0	0	0	0	0	23	5	0.217	#
chr7	118135122	-	NM_001031814	Smg1	3UTR	0	0	0	0	0	0	16	4	0.25	#
chr7	120940487	+	NM_025298	Polr3e	CDS	0	0	0	0	0	0	16	6	0.375	#
chr7	126795652	-	NM_007438	Aldoa	CDS	0	0	0	0	0	0	20	8	0.4	#
chr7	127992842	-	NM_023258	Pycard	stopC	0	0	0	0	0	0	17	5	0.294	#
chr7	127993563	-	NM_023258	Pycard	startC	0	0	0	0	0	0	10	3	0.3	#
chr7	130911717	+	NM_133942	Plekha1	3UTR	0	0	0	0	0	0	19	5	0.263	#
chr7	132558308	-	NM_016978	Oat	stopC	0	0	0	0	0	0	45	8	0.178	#
chr7	135513366	-	NM_178669	Clrn3	3UTR	0	0	0	0	0	0	29	5	0.172	#
chr7	141694518	+	NM_023566	Muc2	CDS	0	0	0	0	0	0	25	7	0.28	#
chr7	141694918	+	NM_023566	Muc2	CDS	0	0	0	0	0	0	26	7	0.269	#
chr7	144463923	-	NM_007803	Cttn	startC	0	0	0	0	0	0	20	3	0.15	#
chr8	3279422	-	NM_010568	Insr	5UTR	14	2	0.143	0	0	0	0	0	0	#
chr8	3604230	+	NM_027171	Camsap3	CDS	19	6	0.316	0	0	0	0	0	0	#
chr8	4359885	+	NM_009138	Ccl25	3UTR	129	18	0.14	144	25	0.174	125	15	0.121	0.145
chr8	11008371	-	NM_001081212	Irs2	startC	12	2	0.167	0	0	0	0	0	0	#
chr8	11008380	-	NM_001081212	Irs2	startC	18	5	0.278	21	7	0.333	17	6	0.353	0.321333
chr8	11008383	-	NM_001081212	Irs2	startC	18	4	0.222	21	3	0.143	18	3	0.167	0.177333
chr8	13939839	+	NM_025785	Fbxo25	stopC	32	6	0.188	0	0	0	0	0	0	#
chr8	21025709	+	NM_183253	Defa21	startC	21	5	0.238	23	4	0.174	18	2	0.111	0.174333
chr8	21095183	-	NM_001177482	Gm14851	stopC	26	9	0.346	29	7	0.241	23	7	0.304	0.297
chr8	21095203	-	NM_001177482	Gm14851	stopC	60	8	0.133	73	11	0.151	0	0	0	#
chr8	21326137	-	NM_007844	Defa-rs1	stopC	168	17	0.101	192	25	0.13	161	20	0.124	0.118333
chr8	21326163	-	NM_007844	Defa-rs1	stopC	152	16	0.105	183	21	0.115	0	0	0	#
chr8	21702791	-	NM_001007582	AY761184	stopC	102	12	0.118	120	15	0.125	0	0	0	#
chr8	21703485	-	NM_001007582	AY761184	startC	26	4	0.154	36	5	0.139	27	7	0.259	0.184
chr8	21734636	+	NM_007852	Defa6	startC	17	2	0.118	0	0	0	0	0	0	#
chr8	21735397	+	NM_001024225	Defa24	stopC	41	7	0.171	46	10	0.217	0	0	0	#
chr8	22377128	-	NM_181325	Slc25a15	3UTR	15	5	0.333	0	0	0	17	6	0.353	#
chr8	33600005	+	NM_017374	Ppp2cb	startC	25	5	0.208	0	0	0	0	0	0	#
chr8	35495283	-	NM_026067	Eri1	startC	18	2	0.111	15	3	0.2	16	2	0.125	0.145333
chr8	35495286	-	NM_026067	Eri1	startC	18	2	0.111	16	2	0.125	18	2	0.111	0.115667
chr8	45051340	+	NM_001081286	Fat1	stopC	10	5	0.5	13	4	0.333	0	0	0	#
chr8	45315674	-	NM_133969	Cyp4v3	CDS	54	12	0.222	55	12	0.218	37	8	0.216	0.218667
chr8	46210934	-	NM_007450	Slc25a4	startC	10	1	0.1	0	0	0	0	0	0	#
chr8	46210937	-	NM_007450	Slc25a4	startC	10	1	0.1	13	2	0.154	0	0	0	#
chr8	60941275	-	NM_007711	Clcn3	startC	14	3	0.214	0	0	0	11	2	0.182	#
chr8	68880746	+	NM_008509	Lpl	startC	12	2	0.167	14	4	0.286	11	5	0.455	0.302667
chr8	69935913	-	NM_145596	Gatad2a	startC	15	2	0.143	24	4	0.167	0	0	0	#
chr8	69935920	-	NM_145596	Gatad2a	startC	20	5	0.25	27	7	0.259	24	4	0.167	0.225333
chr8	69935924	-	NM_145596	Gatad2a	startC	19	3	0.158	27	6	0.222	26	3	0.115	0.165
chr8	69996031	-	NM_145596	Gatad2a	5UTR	17	3	0.176	0	0	0	0	0	0	#
chr8	69996033	-	NM_145596	Gatad2a	5UTR	16	2	0.125	20	2	0.1	18	3	0.167	0.130667
chr8	70332309	-	NM_030680	Upf1	3UTR	14	4	0.286	0	0	0	0	0	0	#
chr8	70332330	-	NM_030680	Upf1	3UTR	24	5	0.208	30	6	0.207	0	0	0	#
chr8	70520060	-	NM_029366	Kxd1	startC	11	4	0.364	11	3	0.273	10	2	0.2	0.279
chr8	70523065	-	NM_029366	Kxd1	5UTR	11	2	0.182	0	0	0	0	0	0	#
chr8	70529540	+	NM_010223	Fkbp8	startC	11	2	0.182	15	2	0.143	10	4	0.444	0.256333
chr8	70529612	+	NM_010223	Fkbp8	startC	11	2	0.182	12	3	0.25	10	4	0.4	0.277333
chr8	70699168	+	NM_010592	Jund	startC	14	2	0.143	24	3	0.125	19	3	0.158	0.142
chr8	70699205	+	NM_010592	Jund	startC	15	5	0.333	19	4	0.211	18	2	0.111	0.218333
chr8	70699216	+	NM_010592	Jund	startC	14	2	0.143	17	2	0.118	13	2	0.154	0.138333
chr8	70699228	+	NM_010592	Jund	startC	12	3	0.25	18	4	0.222	11	2	0.182	0.218
chr8	70869908	-	NM_026964	Ccdc124	startC	13	2	0.154	14	3	0.214	20	2	0.1	0.156
chr8	72219834	+	NM_026455	Fam32a	startC	15	5	0.333	16	4	0.25	10	3	0.3	0.294333
chr8	72219859	+	NM_026455	Fam32a	startC	13	2	0.154	15	2	0.133	0	0	0	#
chr8	79372063	-	NM_008539	Smad1	startC	56	7	0.125	58	7	0.123	47	6	0.13	0.126
chr8	83566786	+	NM_025843	Ndufb7	startC	10	1	0.1	0	0	0	0	0	0	#
chr8	83566790	+	NM_025843	Ndufb7	startC	10	1	0.1	0	0	0	0	0	0	#
chr8	83692791	-	NM_177262	Pkn1	CDS	13	5	0.385	22	9	0.409	0	0	0	#
chr8	84842672	-	NM_007591	Calr	stopC	48	9	0.188	0	0	0	0	0	0	#
chr8	84977288	-	NM_008416	Junb	stopC	14	7	0.5	14	6	0.429	0	0	0	#
chr8	84977294	-	NM_008416	Junb	stopC	15	5	0.333	14	6	0.429	0	0	0	#
chr8	85027002	+	NM_026760	2310036O22Rik	startC	16	2	0.125	11	2	0.182	10	2	0.2	0.169
chr8	85027003	+	NM_026760	2310036O22Rik	startC	18	2	0.111	0	0	0	0	0	0	#
chr8	85027030	+	NM_026760	2310036O22Rik	startC	11	3	0.273	0	0	0	11	2	0.182	#
chr8	85027088	+	NM_026760	2310036O22Rik	startC	13	3	0.231	13	4	0.308	15	3	0.2	0.246333
chr8	88631838	-	NM_027840	Snx20	startC	11	2	0.182	0	0	0	13	2	0.154	#
chr8	89146928	-	ENSMUST00000177870	Gm6625	stopC	16	6	0.375	0	0	0	17	5	0.294	#
chr8	93974171	-	NM_011787	Amfr	CDS	13	5	0.385	0	0	0	0	0	0	#
chr8	94844810	+	NM_026452	Coq9	CDS	30	7	0.233	0	0	0	0	0	0	#
chr8	94864634	-	NM_053246	Dok4	3UTR	14	4	0.286	0	0	0	0	0	0	#
chr8	95129291	-	NM_001145831	Kifc3	startC	13	3	0.231	14	3	0.214	12	2	0.167	0.204
chr8	104442729	-	NM_001013380	Dync1li2	startC	14	2	0.143	0	0	0	11	3	0.273	#
chr8	104442730	-	NM_001013380	Dync1li2	startC	14	5	0.357	12	2	0.167	12	2	0.167	0.230333
chr8	104442743	-	NM_001013380	Dync1li2	startC	14	2	0.143	11	3	0.273	12	2	0.167	0.194333
chr8	104641598	-	NM_026753	Fam96b	startC	11	3	0.273	0	0	0	0	0	0	#
chr8	104641602	-	NM_026753	Fam96b	startC	10	2	0.2	0	0	0	0	0	0	#
chr8	104641605	-	NM_026753	Fam96b	startC	11	3	0.273	12	2	0.167	15	3	0.2	0.213333
chr8	105935788	-	NM_013640	Psmb10	stopC	78	23	0.295	82	20	0.244	69	14	0.206	0.248333
chr8	106669674	+	NM_009864	Cdh1	3UTR	15	5	0.333	0	0	0	0	0	0	#
chr8	106669680	+	NM_009864	Cdh1	3UTR	20	5	0.25	0	0	0	0	0	0	#
chr8	107150671	+	NM_025558	Cyb5b	startC	10	1	0.1	0	0	0	0	0	0	#
chr8	107150701	+	NM_025558	Cyb5b	startC	25	6	0.24	30	5	0.167	26	8	0.308	0.238333
chr8	107150720	+	NM_025558	Cyb5b	startC	27	6	0.222	28	4	0.143	26	4	0.154	0.173
chr8	107150729	+	NM_025558	Cyb5b	startC	16	2	0.125	13	2	0.154	17	2	0.118	0.132333
chr8	107150784	+	NM_025558	Cyb5b	startC	12	2	0.167	10	1	0.1	12	2	0.167	0.144667
chr8	107150797	+	NM_025558	Cyb5b	startC	19	4	0.211	16	2	0.125	16	3	0.188	0.174667
chr8	107185653	+	NM_025558	Cyb5b	3UTR	24	6	0.25	0	0	0	0	0	0	#
chr8	115702994	-	ENSMUST00000109104	Maf	3UTR	22	5	0.227	0	0	0	0	0	0	#
chr8	115705847	-	NM_001025577	Maf	stopC	13	4	0.333	0	0	0	0	0	0	#
chr8	115707111	-	ENSMUST00000109104	Maf	5UTR	39	7	0.179	0	0	0	0	0	0	#
chr8	115707119	-	ENSMUST00000109104	Maf	5UTR	41	6	0.146	56	7	0.125	48	6	0.125	0.132
chr8	115707137	-	ENSMUST00000109104	Maf	5UTR	24	5	0.217	0	0	0	0	0	0	#
chr8	115707353	-	ENSMUST00000109104	Maf	5UTR	14	3	0.214	16	2	0.125	17	3	0.176	0.171667
chr8	115707376	-	ENSMUST00000109104	Maf	5UTR	16	3	0.188	19	3	0.158	19	2	0.105	0.150333
chr8	115707476	-	ENSMUST00000109104	Maf	5UTR	47	9	0.191	57	6	0.105	50	6	0.12	0.138667
chr8	117095927	+	NM_021486	Bco1	startC	16	3	0.188	0	0	0	0	0	0	#
chr8	117257125	+	NM_001163262	Cmip	startC	24	5	0.208	27	7	0.259	21	3	0.143	0.203333
chr8	117257135	+	NM_001163262	Cmip	startC	22	3	0.136	0	0	0	0	0	0	#
chr8	117257136	+	NM_001163262	Cmip	startC	20	4	0.2	26	3	0.115	18	2	0.111	0.142
chr8	117257138	+	NM_001163262	Cmip	startC	19	2	0.105	0	0	0	18	2	0.111	#
chr8	119810289	-	NM_028071	Cotl1	stopC	19	7	0.368	0	0	0	0	0	0	#
chr8	120668339	+	NM_009941	Cox4i1	startC	23	3	0.13	18	3	0.167	16	3	0.188	0.161667
chr8	120669334	+	NM_009941	Cox4i1	CDS	62	10	0.161	0	0	0	0	0	0	#
chr8	121829404	-	NM_145605	Klhdc4	startC	15	2	0.133	19	2	0.105	0	0	0	#
chr8	121829445	-	NM_145605	Klhdc4	startC	18	2	0.111	20	4	0.2	19	3	0.158	0.156333
chr8	121829447	-	NM_145605	Klhdc4	startC	19	3	0.158	0	0	0	0	0	0	#
chr8	122432873	-	NM_007806	Cyba	startC	13	3	0.231	0	0	0	0	0	0	#
chr8	122432888	-	NM_007806	Cyba	startC	11	5	0.455	14	4	0.286	10	4	0.4	0.380333
chr8	122574948	-	NM_009698	Aprt	stopC	33	6	0.182	0	0	0	0	0	0	#
chr8	122574985	-	NM_009698	Aprt	stopC	13	4	0.308	0	0	0	0	0	0	#
chr8	123373934	+	NM_025804	Tcf25	startC	10	2	0.2	10	2	0.2	13	3	0.231	0.210333
chr8	123373954	+	NM_025804	Tcf25	startC	12	2	0.167	12	2	0.167	14	4	0.286	0.206667
chr8	126593582	-	ENSMUST00000054960	Irf2bp2	startC	13	2	0.154	10	1	0.1	15	2	0.133	0.129
chr8	126593588	-	ENSMUST00000054960	Irf2bp2	startC	15	3	0.2	13	2	0.154	17	3	0.176	0.176667
chr8	126593593	-	ENSMUST00000054960	Irf2bp2	startC	15	3	0.2	13	2	0.154	18	4	0.222	0.192
chr8	126593598	-	ENSMUST00000054960	Irf2bp2	startC	16	2	0.125	0	0	0	0	0	0	#
chr8	126593603	-	ENSMUST00000054960	Irf2bp2	startC	17	2	0.118	14	3	0.214	18	5	0.278	0.203333
chr8	126593605	-	ENSMUST00000054960	Irf2bp2	startC	17	2	0.118	0	0	0	0	0	0	#
chr8	126593674	-	ENSMUST00000054960	Irf2bp2	5UTR	15	2	0.133	16	2	0.125	14	4	0.286	0.181333
chr8	126593678	-	ENSMUST00000054960	Irf2bp2	5UTR	14	2	0.143	15	3	0.2	16	3	0.188	0.177
chr8	126593681	-	ENSMUST00000054960	Irf2bp2	5UTR	15	3	0.2	0	0	0	0	0	0	#
chr8	126593685	-	ENSMUST00000054960	Irf2bp2	5UTR	15	3	0.2	18	2	0.111	15	2	0.133	0.148
chr8	126593693	-	ENSMUST00000054960	Irf2bp2	5UTR	15	2	0.133	16	4	0.25	15	2	0.133	0.172
chr8	128468528	+	NM_008737	Nrp1	CDS	12	5	0.417	0	0	0	0	0	0	#
chr8	3279423	-	NM_010568	Insr	5UTR	0	0	0	16	2	0.125	12	2	0.167	#
chr8	21162441	+	NM_207658	Defa22	startC	0	0	0	14	5	0.357	0	0	0	#
chr8	21734658	+	NM_007852	Defa6	startC	0	0	0	116	15	0.129	100	13	0.13	#
chr8	57652867	-	NM_144731	Galnt7	startC	0	0	0	14	2	0.143	10	2	0.2	#
chr8	61969581	+	NM_001293783	Ddx60	CDS	0	0	0	65	10	0.154	0	0	0	#
chr8	69996037	-	NM_145596	Gatad2a	5UTR	0	0	0	18	3	0.167	0	0	0	#
chr8	70699177	+	NM_010592	Jund	startC	0	0	0	22	3	0.136	0	0	0	#
chr8	71404365	+	NM_026636	Babam1	stopC	0	0	0	35	6	0.176	0	0	0	#
chr8	71465491	+	NM_053162	Mrpl34	stopC	0	0	0	16	5	0.312	0	0	0	#
chr8	71692616	-	NM_028189	B3gnt3	stopC	0	0	0	15	6	0.4	13	5	0.385	#
chr8	83998958	+	NM_001081415	Samd1	CDS	0	0	0	35	9	0.257	0	0	0	#
chr8	84246691	-	NM_001007571	D8Ertd738e	stopC	0	0	0	22	5	0.227	0	0	0	#
chr8	84842960	-	NM_007591	Calr	CDS	0	0	0	103	14	0.136	0	0	0	#
chr8	84997174	+	NM_133255	Hook2	CDS	0	0	0	18	6	0.333	0	0	0	#
chr8	85027045	+	NM_026760	2310036O22Rik	startC	0	0	0	14	3	0.214	0	0	0	#
chr8	94588818	-	NM_028221	Fam192a	startC	0	0	0	13	5	0.385	0	0	0	#
chr8	105260533	-	NM_001033161	Tradd	startC	0	0	0	21	3	0.143	0	0	0	#
chr8	106666217	+	NM_009864	Cdh1	CDS	0	0	0	28	9	0.321	0	0	0	#
chr8	107150716	+	NM_025558	Cyb5b	startC	0	0	0	28	4	0.143	0	0	0	#
chr8	111845142	-	NM_011801	Cfdp1	CDS	0	0	0	19	8	0.421	0	0	0	#
chr8	115706030	-	NM_001025577	Maf	CDS	0	0	0	34	9	0.265	0	0	0	#
chr8	115707507	-	ENSMUST00000109104	Maf	5UTR	0	0	0	402	43	0.107	0	0	0	#
chr8	117453149	+	NM_028941	Cmip	CDS	0	0	0	28	7	0.25	0	0	0	#
chr8	119344568	+	NM_024219	Hsbp1	startC	0	0	0	12	4	0.333	0	0	0	#
chr8	120672800	+	NM_009941	Cox4i1	CDS	0	0	0	48	10	0.208	0	0	0	#
chr8	121829397	-	NM_145605	Klhdc4	startC	0	0	0	22	3	0.136	19	3	0.158	#
chr8	122892235	-	NM_001081379	Ankrd11	CDS	0	0	0	38	9	0.237	0	0	0	#
chr8	123042217	-	NM_001081379	Ankrd11	5UTR	0	0	0	11	2	0.182	0	0	0	#
chr8	126593332	-	NM_001164598	Irf2bp2	startC	0	0	0	10	1	0.1	0	0	0	#
chr8	126593675	-	ENSMUST00000054960	Irf2bp2	5UTR	0	0	0	16	2	0.125	0	0	0	#
chr8	127426664	+	NM_033620	Pard3	CDS	0	0	0	48	9	0.188	0	0	0	#
chr8	128685899	+	NM_010578	Itgb1	5UTR	0	0	0	10	2	0.2	0	0	0	#
chr8	11008374	-	NM_001081212	Irs2	startC	0	0	0	0	0	0	18	2	0.111	#
chr8	13172613	+	NM_010684	Lamp1	CDS	0	0	0	0	0	0	19	6	0.316	#
chr8	21162453	+	NM_207658	Defa22	startC	0	0	0	0	0	0	15	2	0.133	#
chr8	21702729	-	NM_001007582	AY761184	stopC	0	0	0	0	0	0	37	6	0.162	#
chr8	21735305	+	NM_007852	Defa6	stopC	0	0	0	0	0	0	57	9	0.158	#
chr8	21735363	+	NM_007852	Defa6	stopC	0	0	0	0	0	0	28	6	0.214	#
chr8	57652988	-	NM_144731	Galnt7	startC	0	0	0	0	0	0	10	2	0.2	#
chr8	69894574	-	NM_023312	Ndufa13	CDS	0	0	0	0	0	0	21	7	0.333	#
chr8	70312939	+	NM_021538	Cope	stopC	0	0	0	0	0	0	11	6	0.545	#
chr8	70699188	+	NM_010592	Jund	startC	0	0	0	0	0	0	19	2	0.105	#
chr8	70869929	-	NM_026964	Ccdc124	startC	0	0	0	0	0	0	16	2	0.125	#
chr8	71367358	+	NM_025917	Use1	startC	0	0	0	0	0	0	10	3	0.3	#
chr8	72219985	+	NM_026455	Fam32a	startC	0	0	0	0	0	0	86	10	0.116	#
chr8	83571470	+	NM_025843	Ndufb7	stopC	0	0	0	0	0	0	22	5	0.227	#
chr8	84842779	-	NM_007591	Calr	stopC	0	0	0	0	0	0	302	37	0.123	#
chr8	85027015	+	NM_026760	2310036O22Rik	startC	0	0	0	0	0	0	12	2	0.167	#
chr8	88361540	-	NM_012047	Brd7	CDS	0	0	0	0	0	0	25	7	0.28	#
chr8	94866809	-	NM_053246	Dok4	CDS	0	0	0	0	0	0	12	5	0.417	#
chr8	117095926	+	NM_021486	Bco1	startC	0	0	0	0	0	0	18	3	0.167	#
chr8	117095946	+	NM_021486	Bco1	startC	0	0	0	0	0	0	20	3	0.15	#
chr8	117257141	+	NM_001163262	Cmip	startC	0	0	0	0	0	0	18	2	0.111	#
chr8	122574962	-	NM_009698	Aprt	stopC	0	0	0	0	0	0	28	6	0.214	#
chr8	123199102	+	NM_007876	Dpep1	CDS	0	0	0	0	0	0	32	8	0.25	#
chr8	126591149	-	NM_001164598	Irf2bp2	stopC	0	0	0	0	0	0	25	7	0.28	#
chr8	126593613	-	ENSMUST00000054960	Irf2bp2	startC	0	0	0	0	0	0	17	3	0.176	#
chr9	4383833	+	NM_145609	Msantd4	startC	17	2	0.118	0	0	0	18	2	0.111	#
chr9	4383850	+	NM_145609	Msantd4	startC	19	5	0.263	20	2	0.1	20	3	0.15	0.171
chr9	15290766	-	NM_133732	4931406C07Rik	CDS	45	11	0.244	0	0	0	0	0	0	#
chr9	20652164	+	NM_023371	Pin1	startC	11	3	0.273	0	0	0	0	0	0	#
chr9	20889520	+	uc012goy.1	AK085695	3UTR	11	4	0.364	0	0	0	0	0	0	#
chr9	21425005	+	NM_007871	Dnm2	startC	14	7	0.5	17	5	0.294	13	3	0.231	0.341667
chr9	21425088	+	NM_007871	Dnm2	startC	13	2	0.154	16	3	0.188	14	2	0.143	0.161667
chr9	21425107	+	NM_007871	Dnm2	startC	12	3	0.25	18	2	0.111	14	2	0.143	0.168
chr9	21677633	+	NM_011417	Smarca4	CDS	12	5	0.417	0	0	0	0	0	0	#
chr9	21702953	+	NM_011417	Smarca4	stopC	34	7	0.206	0	0	0	0	0	0	#
chr9	21748156	+	NM_010700	Ldlr	stopC	25	6	0.24	0	0	0	0	0	0	#
chr9	27000035	+	NM_144543	Thyn1	startC	19	2	0.105	0	0	0	0	0	0	#
chr9	27299261	+	NM_001033323	Igsf9b	startC	13	2	0.154	18	2	0.111	15	2	0.133	0.132667
chr9	31089923	-	NM_011176	St14	stopC	31	6	0.194	42	8	0.195	0	0	0	#
chr9	31131679	-	NM_011176	St14	startC	18	6	0.333	22	6	0.273	18	6	0.333	0.313
chr9	31211779	-	NM_009691	Aplp2	startC	40	8	0.2	44	6	0.136	42	9	0.22	0.185333
chr9	31431367	-	NM_144936	Tmem45b	startC	17	2	0.118	0	0	0	0	0	0	#
chr9	31431381	-	NM_144936	Tmem45b	startC	19	2	0.105	0	0	0	0	0	0	#
chr9	31464186	-	NM_144936	Tmem45b	5UTR	15	2	0.133	0	0	0	0	0	0	#
chr9	35055634	-	NM_009178	St3gal4	startC	12	3	0.25	16	3	0.188	17	4	0.235	0.224333
chr9	40801316	+	NM_031165	Hspa8	5UTR	22	5	0.227	27	5	0.185	22	5	0.227	0.213
chr9	40801318	+	NM_031165	Hspa8	5UTR	24	3	0.125	27	5	0.185	21	4	0.19	0.166667
chr9	40801321	+	NM_031165	Hspa8	5UTR	22	5	0.227	27	6	0.222	22	5	0.227	0.225333
chr9	40803586	+	uc009ozz.1	Hspa8	stopC	16	5	0.312	0	0	0	0	0	0	#
chr9	40803647	+	uc009ozz.1	Hspa8	stopC	34	6	0.176	0	0	0	0	0	0	#
chr9	40803661	+	uc009ozz.1	Hspa8	stopC	29	6	0.207	45	10	0.222	31	8	0.258	0.229
chr9	40804063	+	uc009ozz.1	Hspa8	3UTR	56	9	0.161	0	0	0	46	9	0.196	#
chr9	40804820	+	uc009ozz.1	Hspa8	3UTR	46	7	0.152	0	0	0	53	7	0.132	#
chr9	42999145	-	NM_027144	Arhgef12	CDS	42	9	0.214	36	8	0.222	0	0	0	#
chr9	44319995	-	NM_027909	C2cd2l	startC	21	3	0.143	22	3	0.143	18	2	0.118	0.134667
chr9	44319996	-	NM_027909	C2cd2l	startC	20	2	0.1	23	4	0.174	20	5	0.25	0.174667
chr9	45931643	-	NM_011526	Tagln	startC	10	1	0.1	0	0	0	0	0	0	#
chr9	45931693	-	NM_011526	Tagln	startC	35	5	0.143	0	0	0	0	0	0	#
chr9	45931715	-	NM_011526	Tagln	startC	10	1	0.1	0	0	0	0	0	0	#
chr9	46228716	+	NM_009692	Apoa1	5UTR	19	4	0.211	15	3	0.2	14	2	0.143	0.184667
chr9	46228727	+	NM_009692	Apoa1	5UTR	16	5	0.312	18	3	0.167	0	0	0	#
chr9	46228948	+	NM_009692	Apoa1	startC	20	2	0.1	26	4	0.154	0	0	0	#
chr9	46228972	+	NM_009692	Apoa1	startC	41	5	0.122	53	9	0.17	45	7	0.156	0.149333
chr9	46228982	+	NM_009692	Apoa1	startC	38	5	0.132	50	7	0.14	42	6	0.143	0.138333
chr9	46228984	+	NM_009692	Apoa1	startC	38	10	0.263	47	8	0.17	39	5	0.128	0.187
chr9	46229121	+	NM_009692	Apoa1	startC	22	4	0.182	0	0	0	0	0	0	#
chr9	46229815	+	NM_009692	Apoa1	CDS	39	8	0.205	0	0	0	0	0	0	#
chr9	46229866	+	NM_009692	Apoa1	CDS	198	30	0.152	237	34	0.143	186	24	0.129	0.141333
chr9	46229871	+	NM_009692	Apoa1	CDS	251	33	0.131	286	33	0.116	229	34	0.148	0.131667
chr9	46229899	+	NM_009692	Apoa1	CDS	562	67	0.119	0	0	0	0	0	0	#
chr9	46230037	+	NM_009692	Apoa1	CDS	284	37	0.13	365	47	0.129	294	47	0.16	0.139667
chr9	46230038	+	NM_009692	Apoa1	CDS	294	41	0.139	378	45	0.119	295	33	0.112	0.123333
chr9	46230040	+	NM_009692	Apoa1	CDS	315	39	0.124	386	43	0.111	327	42	0.128	0.121
chr9	46230047	+	NM_009692	Apoa1	CDS	358	38	0.106	0	0	0	357	36	0.101	#
chr9	46230052	+	NM_009692	Apoa1	CDS	311	32	0.103	0	0	0	0	0	0	#
chr9	46230085	+	NM_009692	Apoa1	CDS	435	46	0.106	529	58	0.11	417	54	0.129	0.115
chr9	46230110	+	NM_009692	Apoa1	CDS	219	29	0.132	288	40	0.139	235	34	0.145	0.138667
chr9	46230195	+	NM_009692	Apoa1	CDS	341	35	0.103	0	0	0	0	0	0	#
chr9	46230208	+	NM_009692	Apoa1	stopC	291	37	0.128	344	39	0.113	299	47	0.158	0.133
chr9	46230310	+	NM_009692	Apoa1	stopC	300	35	0.117	364	50	0.137	307	39	0.127	0.127
chr9	46230377	+	NM_009692	Apoa1	stopC	619	68	0.11	669	78	0.117	625	81	0.13	0.119
chr9	46241148	+	NM_007468	Apoa4	startC	36	5	0.139	0	0	0	0	0	0	#
chr9	46241167	+	NM_007468	Apoa4	startC	39	4	0.103	61	7	0.115	48	5	0.104	0.107333
chr9	46241170	+	NM_007468	Apoa4	startC	39	4	0.103	57	6	0.107	47	6	0.128	0.112667
chr9	46241175	+	NM_007468	Apoa4	startC	28	3	0.107	0	0	0	0	0	0	#
chr9	46241194	+	NM_007468	Apoa4	startC	10	7	0.7	12	5	0.417	10	4	0.4	0.505667
chr9	46242378	+	NM_007468	Apoa4	CDS	190	19	0.1	202	21	0.104	176	18	0.102	0.102
chr9	46242418	+	NM_007468	Apoa4	CDS	386	56	0.145	449	59	0.132	363	46	0.127	0.134667
chr9	46242448	+	NM_007468	Apoa4	CDS	133	15	0.113	186	20	0.108	0	0	0	#
chr9	46242470	+	NM_007468	Apoa4	CDS	102	17	0.167	128	19	0.148	113	16	0.142	0.152333
chr9	46242789	+	NM_007468	Apoa4	CDS	239	36	0.153	277	46	0.168	246	45	0.186	0.169
chr9	46242822	+	NM_007468	Apoa4	CDS	223	33	0.148	236	42	0.179	228	38	0.167	0.164667
chr9	46242921	+	NM_007468	Apoa4	CDS	520	89	0.171	634	107	0.169	524	84	0.161	0.167
chr9	46242988	+	NM_007468	Apoa4	CDS	358	57	0.159	407	64	0.158	360	64	0.178	0.165
chr9	46242997	+	NM_007468	Apoa4	CDS	328	42	0.128	361	48	0.133	333	34	0.102	0.121
chr9	46243028	+	NM_007468	Apoa4	CDS	107	12	0.112	112	19	0.17	95	12	0.126	0.136
chr9	46243072	+	NM_007468	Apoa4	CDS	84	11	0.133	0	0	0	0	0	0	#
chr9	46243093	+	NM_007468	Apoa4	stopC	58	11	0.19	71	12	0.169	0	0	0	#
chr9	46243129	+	NM_007468	Apoa4	stopC	59	10	0.169	64	8	0.125	0	0	0	#
chr9	46243141	+	NM_007468	Apoa4	stopC	30	7	0.233	31	6	0.194	0	0	0	#
chr9	50533385	-	NM_133217	Bco2	stopC	15	7	0.467	14	7	0.5	11	4	0.364	0.443667
chr9	54957678	+	NM_011966	Psma4	stopC	13	4	0.308	0	0	0	0	0	0	#
chr9	54957743	+	NM_011966	Psma4	stopC	70	10	0.143	79	10	0.127	65	8	0.123	0.131
chr9	57442516	-	NM_020270	Scamp5	3UTR	22	5	0.227	0	0	0	19	5	0.263	#
chr9	57521372	+	NM_007747	Cox5a	startC	10	1	0.1	0	0	0	0	0	0	#
chr9	57627096	-	NM_007783	Csk	3UTR	13	5	0.385	0	0	0	12	4	0.333	#
chr9	57912652	+	NM_027086	Ubl7	startC	23	4	0.174	31	4	0.129	25	4	0.16	0.154333
chr9	59486249	-	NM_019927	Arih1	startC	11	3	0.273	16	5	0.312	10	2	0.2	0.261667
chr9	59486277	-	NM_019927	Arih1	startC	20	2	0.1	0	0	0	0	0	0	#
chr9	59486294	-	NM_019927	Arih1	startC	17	5	0.294	20	3	0.15	16	4	0.25	0.231333
chr9	59486297	-	NM_019927	Arih1	startC	16	2	0.125	18	2	0.111	14	3	0.214	0.15
chr9	59486306	-	NM_019927	Arih1	startC	10	1	0.1	12	2	0.167	10	3	0.3	0.189
chr9	61372994	+	NM_009389	Tle3	5UTR	10	1	0.1	0	0	0	0	0	0	#
chr9	61373365	+	NM_009389	Tle3	startC	40	5	0.125	38	7	0.184	35	6	0.171	0.16
chr9	62875580	+	NM_138304	Calml4	stopC	11	4	0.364	0	0	0	0	0	0	#
chr9	64021966	-	NM_008542	Smad6	5UTR	18	3	0.167	16	2	0.125	0	0	0	#
chr9	64176992	+	NM_024212	Rpl4	CDS	37	9	0.243	0	0	0	0	0	0	#
chr9	64214542	-	NM_008927	Map2k1	CDS	11	5	0.455	0	0	0	0	0	0	#
chr9	64253426	-	NM_008927	Map2k1	startC	17	5	0.294	19	5	0.263	15	5	0.333	0.296667
chr9	64253434	-	NM_008927	Map2k1	startC	17	3	0.176	20	5	0.25	20	4	0.2	0.208667
chr9	64253450	-	NM_008927	Map2k1	startC	14	3	0.214	0	0	0	0	0	0	#
chr9	64253456	-	NM_008927	Map2k1	startC	16	2	0.125	16	2	0.125	14	2	0.143	0.131
chr9	64253464	-	NM_008927	Map2k1	startC	20	2	0.1	16	2	0.125	17	2	0.118	0.114333
chr9	64253486	-	NM_008927	Map2k1	startC	14	2	0.143	15	2	0.133	15	2	0.133	0.136333
chr9	64253496	-	NM_008927	Map2k1	5UTR	10	1	0.1	10	1	0.1	10	1	0.1	0.1
chr9	67023188	-	NM_024427	Tpm1	stopC	109	15	0.138	124	24	0.194	113	25	0.221	0.184333
chr9	67036049	-	NM_024427	Tpm1	CDS	76	11	0.145	94	14	0.149	0	0	0	#
chr9	67043619	-	NM_001164252	Tpm1	startC	25	8	0.32	25	3	0.12	20	3	0.15	0.196667
chr9	67049025	-	NM_024427	Tpm1	startC	22	3	0.136	20	4	0.2	22	4	0.182	0.172667
chr9	67049031	-	NM_024427	Tpm1	startC	32	4	0.125	0	0	0	0	0	0	#
chr9	67049053	-	NM_024427	Tpm1	startC	58	7	0.121	0	0	0	0	0	0	#
chr9	69487624	+	NM_007585	Anxa2	CDS	33	8	0.242	0	0	0	0	0	0	#
[truncated: 2,323 more rows]

## Sheet: OGD_R
						OGD/R 1			OGD/R 2			OGD/R 3			OGD/R
SeqID	refPos	refStrand	transcript_id	GeneName	gene_region	cov	C_count	methRate	cov	C_count	methRate	cov	C_count	methRate	Overall m5C Level
chr1	10232495	-	NM_001102430	Arfgef1	startC	17	3	0.176	17	4	0.235	17	3	0.176	0.195667
chr1	10232511	-	NM_001102430	Arfgef1	startC	19	2	0.105	20	3	0.15	18	3	0.167	0.140667
chr1	36068621	+	NM_015818	Hs6st1	startC	15	2	0.133	14	2	0.143	13	2	0.154	0.143333
chr1	36068622	+	NM_015818	Hs6st1	startC	15	3	0.2	15	2	0.133	12	4	0.333	0.222
chr1	36068627	+	NM_015818	Hs6st1	startC	14	2	0.143	0	0	0	0	0	0	#
chr1	36068628	+	NM_015818	Hs6st1	startC	15	2	0.133	15	2	0.133	13	3	0.231	0.165667
chr1	36068635	+	NM_015818	Hs6st1	startC	12	3	0.25	15	3	0.2	11	3	0.273	0.241
chr1	36068799	+	NM_015818	Hs6st1	startC	15	2	0.133	12	3	0.25	10	1	0.1	0.161
chr1	36068816	+	NM_015818	Hs6st1	startC	11	3	0.273	0	0	0	0	0	0	#
chr1	37442138	-	NM_173870	Mgat4a	3UTR	12	3	0.25	0	0	0	0	0	0	#
chr1	39368187	+	NM_053257	Rpl31	startC	28	3	0.107	16	3	0.188	27	5	0.185	0.16
chr1	39368214	+	NM_053257	Rpl31	startC	26	6	0.231	16	3	0.188	24	4	0.167	0.195333
chr1	43163738	-	NM_010212	Fhl2	5UTR	14	3	0.214	16	3	0.188	10	2	0.2	0.200667
chr1	43163739	-	NM_010212	Fhl2	5UTR	15	5	0.333	15	5	0.333	12	3	0.25	0.305333
chr1	43163753	-	NM_010212	Fhl2	5UTR	14	2	0.143	18	5	0.278	13	2	0.154	0.191667
chr1	63177210	+	NM_018796	Eef1b2	startC	25	5	0.2	20	3	0.15	16	2	0.125	0.158333
chr1	64532989	+	NM_009952	Creb1	5UTR	27	3	0.111	22	4	0.182	19	4	0.211	0.168
chr1	64731391	-	NM_022721	Fzd5	3UTR	14	4	0.286	0	0	0	0	0	0	#
chr1	64737298	-	NM_022721	Fzd5	5UTR	15	3	0.2	12	3	0.25	15	3	0.2	0.216667
chr1	64737616	-	NM_022721	Fzd5	5UTR	11	2	0.182	0	0	0	0	0	0	#
chr1	74236821	+	NM_029711	Arpc2	startC	26	5	0.192	30	6	0.2	17	3	0.176	0.189333
chr1	74236835	+	NM_029711	Arpc2	startC	24	3	0.125	0	0	0	0	0	0	#
chr1	74409430	+	NM_009509	Vil1	5UTR	18	2	0.111	0	0	0	0	0	0	#
chr1	74415129	+	NM_009509	Vil1	startC	22	3	0.136	25	4	0.16	22	4	0.182	0.159333
chr1	74418410	+	NM_009509	Vil1	CDS	63	9	0.143	0	0	0	0	0	0	#
chr1	74418497	+	NM_009509	Vil1	CDS	59	11	0.186	0	0	0	0	0	0	#
chr1	74419666	+	NM_009509	Vil1	CDS	61	9	0.148	0	0	0	59	8	0.136	#
chr1	74421260	+	NM_009509	Vil1	CDS	77	9	0.117	67	10	0.149	0	0	0	#
chr1	74421806	+	NM_009509	Vil1	CDS	77	12	0.156	74	13	0.176	66	9	0.136	0.156
chr1	74423911	+	NM_009509	Vil1	CDS	16	5	0.312	0	0	0	0	0	0	#
chr1	74426707	+	NM_009509	Vil1	CDS	25	6	0.24	18	5	0.278	0	0	0	#
chr1	74427620	+	NM_009509	Vil1	CDS	70	13	0.186	63	11	0.175	0	0	0	#
chr1	74430650	+	NM_009509	Vil1	CDS	80	11	0.138	71	13	0.183	72	11	0.153	0.158
chr1	74432416	+	NM_009509	Vil1	CDS	172	20	0.116	134	17	0.127	146	20	0.137	0.126667
chr1	74432417	+	NM_009509	Vil1	CDS	169	31	0.183	132	19	0.144	148	17	0.115	0.147333
chr1	74432418	+	NM_009509	Vil1	CDS	155	18	0.116	121	13	0.107	136	20	0.147	0.123333
chr1	74432419	+	NM_009509	Vil1	CDS	146	19	0.13	118	12	0.102	129	14	0.109	0.113667
chr1	74435009	+	NM_009509	Vil1	stopC	58	11	0.19	49	7	0.143	56	8	0.143	0.158667
chr1	74951337	-	NM_010544	Ihh	startC	13	2	0.154	12	2	0.167	10	1	0.1	0.140333
chr1	74951343	-	NM_010544	Ihh	startC	12	2	0.167	13	3	0.231	11	2	0.182	0.193333
chr1	75140944	-	NM_026977	Cnppd1	CDS	14	5	0.357	0	0	0	0	0	0	#
chr1	75211050	+	NM_011494	Stk16	5UTR	10	3	0.3	0	0	0	0	0	0	#
chr1	75211997	+	NM_011494	Stk16	CDS	19	6	0.316	0	0	0	0	0	0	#
chr1	80340449	-	ENSMUST00000163119	Cul3	startC	14	3	0.214	0	0	0	0	0	0	#
chr1	85793719	+	NM_133781	Cab39	5UTR	18	2	0.111	20	4	0.2	18	6	0.333	0.214667
chr1	85793724	+	NM_133781	Cab39	5UTR	18	4	0.222	22	6	0.273	18	5	0.278	0.257667
chr1	85793726	+	NM_133781	Cab39	5UTR	17	4	0.25	22	3	0.136	17	3	0.176	0.187333
chr1	85793728	+	NM_133781	Cab39	5UTR	18	2	0.111	21	3	0.143	18	4	0.222	0.158667
chr1	86356454	-	NM_010880	Ncl	CDS	23	6	0.261	0	0	0	0	0	0	#
chr1	86526947	+	NM_008972	Ptma	startC	17	3	0.176	22	4	0.182	20	4	0.2	0.186
chr1	87101362	-	NM_001081082	Alpi	startC	11	3	0.273	0	0	0	0	0	0	#
chr1	93413493	-	NM_133808	Hdlbp	CDS	21	6	0.286	0	0	0	0	0	0	#
chr1	93413514	-	NM_133808	Hdlbp	CDS	50	8	0.16	50	8	0.16	42	8	0.19	0.17
chr1	93635340	-	NM_021537	Stk25	startC	15	3	0.2	16	3	0.188	16	2	0.125	0.171
chr1	93635354	-	NM_021537	Stk25	startC	14	2	0.143	12	2	0.167	15	3	0.2	0.17
chr1	93635357	-	NM_021537	Stk25	startC	13	3	0.231	13	3	0.231	14	2	0.143	0.201667
chr1	93635573	-	NM_021537	Stk25	5UTR	19	4	0.211	17	3	0.176	12	2	0.167	0.184667
chr1	106796464	-	NM_009190	Vps4b	startC	10	2	0.2	10	3	0.3	12	2	0.167	0.222333
chr1	120113408	-	NM_007830	Dbi	stopC	67	9	0.136	0	0	0	0	0	0	#
chr1	125435312	-	NM_023735	Actr3	startC	19	2	0.105	20	3	0.15	15	3	0.2	0.151667
chr1	128285292	-	NM_001081078	Lct	stopC	47	6	0.128	42	6	0.143	0	0	0	#
chr1	128286653	-	NM_001081078	Lct	CDS	32	7	0.219	0	0	0	0	0	0	#
chr1	128287676	-	NM_001081078	Lct	CDS	32	7	0.219	0	0	0	0	0	0	#
chr1	128295223	-	NM_001081078	Lct	CDS	85	12	0.141	104	16	0.154	0	0	0	#
chr1	128295322	-	NM_001081078	Lct	CDS	72	10	0.139	0	0	0	0	0	0	#
chr1	128300321	-	NM_001081078	Lct	CDS	64	12	0.188	0	0	0	48	9	0.188	#
chr1	128300338	-	NM_001081078	Lct	CDS	50	8	0.16	53	10	0.189	0	0	0	#
chr1	128307928	-	NM_001081078	Lct	CDS	27	7	0.259	0	0	0	0	0	0	#
chr1	128308200	-	NM_001081078	Lct	CDS	11	5	0.455	0	0	0	10	4	0.4	#
chr1	128311583	-	NM_001081078	Lct	CDS	45	8	0.178	42	7	0.167	0	0	0	#
chr1	130826763	+	NM_011082	Pigr	5UTR	127	19	0.15	125	16	0.128	110	13	0.118	0.132
chr1	130834403	+	NM_011082	Pigr	startC	24	3	0.125	25	5	0.2	20	4	0.2	0.175
chr1	130834410	+	NM_011082	Pigr	startC	24	3	0.125	24	4	0.167	16	2	0.125	0.139
chr1	130834413	+	NM_011082	Pigr	startC	22	3	0.136	22	3	0.136	17	3	0.176	0.149333
chr1	130841813	+	NM_011082	Pigr	CDS	60	11	0.183	60	13	0.22	0	0	0	#
chr1	130844986	+	NM_011082	Pigr	CDS	78	12	0.154	64	10	0.156	78	12	0.154	0.154667
chr1	130846483	+	NM_011082	Pigr	CDS	131	20	0.153	129	24	0.186	120	17	0.142	0.160333
chr1	130846592	+	NM_011082	Pigr	CDS	26	6	0.231	26	6	0.231	0	0	0	#
chr1	130847434	+	NM_011082	Pigr	CDS	137	16	0.117	95	11	0.116	110	12	0.109	0.114
chr1	130848488	+	NM_011082	Pigr	CDS	159	22	0.138	138	16	0.116	119	13	0.109	0.121
chr1	130848561	+	NM_011082	Pigr	CDS	43	7	0.163	0	0	0	0	0	0	#
chr1	130848615	+	NM_011082	Pigr	CDS	141	18	0.128	155	20	0.129	129	14	0.109	0.122
chr1	130849080	+	NM_011082	Pigr	CDS	78	13	0.167	0	0	0	71	10	0.141	#
chr1	130849543	+	NM_011082	Pigr	CDS	110	17	0.155	113	12	0.106	93	10	0.108	0.123
chr1	130849774	+	NM_011082	Pigr	CDS	120	15	0.125	103	15	0.146	100	10	0.1	0.123667
chr1	130850882	+	NM_011082	Pigr	stopC	49	8	0.163	38	10	0.263	0	0	0	#
chr1	130850903	+	NM_011082	Pigr	stopC	65	10	0.154	47	8	0.17	0	0	0	#
chr1	130851053	+	NM_011082	Pigr	stopC	82	14	0.171	77	9	0.117	86	11	0.128	0.138667
chr1	130851079	+	NM_011082	Pigr	stopC	40	6	0.15	27	5	0.185	23	5	0.217	0.184
chr1	130851084	+	NM_011082	Pigr	stopC	38	9	0.237	27	6	0.222	0	0	0	#
chr1	130851124	+	NM_011082	Pigr	3UTR	66	9	0.136	50	9	0.18	46	8	0.174	0.163333
chr1	130851655	+	NM_011082	Pigr	3UTR	29	7	0.241	21	6	0.286	34	10	0.294	0.273667
chr1	130851715	+	NM_011082	Pigr	3UTR	33	7	0.212	0	0	0	36	9	0.25	#
chr1	130851716	+	NM_011082	Pigr	3UTR	33	5	0.152	30	6	0.2	35	5	0.143	0.165
chr1	130851752	+	NM_011082	Pigr	3UTR	119	14	0.118	99	10	0.101	104	13	0.125	0.114667
chr1	130852094	+	NM_011082	Pigr	3UTR	105	11	0.105	86	11	0.128	89	9	0.101	0.111333
chr1	133131692	+	NM_133819	Ppp1r15b	startC	25	5	0.2	19	3	0.158	23	5	0.217	0.191667
chr1	133131732	+	NM_133819	Ppp1r15b	startC	10	1	0.1	0	0	0	0	0	0	#
chr1	134079006	-	NM_007570	Btg2	startC	16	3	0.188	10	2	0.2	10	3	0.3	0.229333
chr1	134079010	-	NM_007570	Btg2	startC	16	2	0.125	10	2	0.2	10	1	0.1	0.141667
chr1	134361928	-	NM_020588	Tmem183a	startC	11	2	0.182	0	0	0	0	0	0	#
chr1	134424015	+	NM_028320	Adipor1	CDS	37	8	0.216	0	0	0	31	8	0.258	#
chr1	134424027	+	NM_028320	Adipor1	CDS	37	7	0.189	36	7	0.194	0	0	0	#
chr1	135254337	-	NM_007921	Elf3	stopC	18	4	0.222	15	5	0.333	19	8	0.421	0.325333
chr1	135254997	-	NM_007921	Elf3	CDS	16	5	0.312	0	0	0	0	0	0	#
chr1	135258410	-	NM_007921	Elf3	5UTR	17	3	0.176	12	2	0.167	11	2	0.182	0.175
chr1	135258413	-	NM_007921	Elf3	5UTR	18	2	0.111	13	2	0.154	11	4	0.364	0.209667
chr1	135258428	-	NM_007921	Elf3	5UTR	21	3	0.143	12	2	0.167	11	2	0.182	0.164
chr1	135258431	-	NM_007921	Elf3	5UTR	22	3	0.136	13	3	0.231	10	1	0.1	0.155667
chr1	135729257	+	NM_007791	Csrp1	5UTR	11	2	0.182	0	0	0	0	0	0	#
chr1	135827438	+	NM_133664	Lad1	CDS	21	6	0.286	0	0	0	0	0	0	#
chr1	138963877	+	NM_001166501	Dennd1b	startC	11	3	0.273	0	0	0	0	0	0	#
chr1	151344664	+	NM_054102	Ivns1abp	5UTR	19	3	0.158	19	2	0.105	16	3	0.188	0.150333
chr1	151344674	+	NM_054102	Ivns1abp	5UTR	16	4	0.25	18	2	0.111	16	2	0.125	0.162
chr1	151344699	+	NM_054102	Ivns1abp	5UTR	10	2	0.2	12	2	0.167	16	2	0.125	0.164
chr1	151361629	+	NM_054102	Ivns1abp	CDS	20	7	0.35	0	0	0	12	5	0.417	#
chr1	155097674	-	NM_010500	Ier5	3UTR	12	3	0.273	0	0	0	0	0	0	#
chr1	155098141	-	NM_010500	Ier5	3UTR	10	3	0.3	0	0	0	11	3	0.273	#
chr1	155098145	-	NM_010500	Ier5	3UTR	12	7	0.583	0	0	0	0	0	0	#
chr1	155098148	-	NM_010500	Ier5	3UTR	12	3	0.25	11	3	0.273	11	4	0.364	0.295667
chr1	155098152	-	NM_010500	Ier5	3UTR	12	3	0.25	0	0	0	11	3	0.273	#
chr1	155098158	-	NM_010500	Ier5	3UTR	12	3	0.25	0	0	0	0	0	0	#
chr1	156040959	+	NM_022329	Tor1aip2	5UTR	10	1	0.1	16	2	0.125	14	2	0.143	0.122667
chr1	156040966	+	NM_022329	Tor1aip2	5UTR	10	1	0.1	0	0	0	0	0	0	#
chr1	156706080	-	NM_145413	Fam20b	startC	10	2	0.2	0	0	0	0	0	0	#
chr1	162740361	-	NM_001081290	Prrc2c	5UTR	15	3	0.2	13	3	0.231	11	2	0.182	0.204333
chr1	162740362	-	NM_001081290	Prrc2c	5UTR	15	2	0.133	0	0	0	0	0	0	#
chr1	162740385	-	NM_001081290	Prrc2c	5UTR	15	3	0.2	12	4	0.333	10	3	0.3	0.277667
chr1	164437536	-	NM_009721	Atp1b1	3UTR	36	5	0.139	33	5	0.152	0	0	0	#
chr1	164438342	-	NM_009721	Atp1b1	stopC	22	5	0.227	20	5	0.25	0	0	0	#
chr1	164438470	-	NM_009721	Atp1b1	stopC	27	5	0.185	0	0	0	20	5	0.25	#
chr1	164443202	-	NM_009721	Atp1b1	CDS	96	14	0.146	77	13	0.169	83	10	0.12	0.145
chr1	164443320	-	NM_009721	Atp1b1	CDS	38	7	0.184	35	9	0.257	40	7	0.175	0.205333
chr1	164453579	-	NM_009721	Atp1b1	CDS	27	6	0.222	0	0	0	0	0	0	#
chr1	164457851	-	NM_009721	Atp1b1	startC	89	9	0.101	90	10	0.111	72	8	0.111	0.107667
chr1	164457853	-	NM_009721	Atp1b1	startC	88	9	0.102	0	0	0	0	0	0	#
chr1	164457905	-	NM_009721	Atp1b1	startC	112	15	0.135	108	15	0.139	95	14	0.147	0.140333
chr1	164457911	-	NM_009721	Atp1b1	startC	114	16	0.14	113	12	0.106	92	11	0.12	0.122
chr1	164457950	-	NM_009721	Atp1b1	startC	45	8	0.178	34	7	0.206	40	9	0.231	0.205
chr1	164457951	-	NM_009721	Atp1b1	startC	43	5	0.116	32	4	0.129	41	6	0.146	0.130333
chr1	164457980	-	NM_009721	Atp1b1	startC	35	4	0.114	23	3	0.13	17	4	0.235	0.159667
chr1	164458031	-	NM_009721	Atp1b1	startC	40	4	0.1	0	0	0	0	0	0	#
chr1	164458047	-	NM_009721	Atp1b1	startC	26	3	0.115	25	3	0.12	29	4	0.138	0.124333
chr1	164458073	-	NM_009721	Atp1b1	5UTR	12	3	0.25	17	2	0.118	14	3	0.214	0.194
chr1	164458087	-	NM_009721	Atp1b1	5UTR	33	4	0.121	37	5	0.135	23	4	0.174	0.143333
chr1	164458115	-	NM_009721	Atp1b1	5UTR	59	6	0.102	58	7	0.121	45	5	0.111	0.111333
chr1	164458117	-	NM_009721	Atp1b1	5UTR	60	7	0.117	60	10	0.167	43	8	0.186	0.156667
chr1	164458136	-	NM_009721	Atp1b1	5UTR	48	5	0.104	40	4	0.1	41	6	0.146	0.116667
chr1	164458143	-	NM_009721	Atp1b1	5UTR	50	7	0.14	0	0	0	0	0	0	#
chr1	164458174	-	NM_009721	Atp1b1	5UTR	28	3	0.107	28	3	0.107	29	6	0.207	0.140333
chr1	164458191	-	NM_009721	Atp1b1	5UTR	26	4	0.16	23	7	0.304	22	3	0.136	0.2
chr1	164458193	-	NM_009721	Atp1b1	5UTR	28	5	0.179	24	3	0.125	20	2	0.1	0.134667
chr1	164458200	-	NM_009721	Atp1b1	5UTR	20	2	0.1	17	2	0.118	13	2	0.154	0.124
chr1	164458222	-	NM_009721	Atp1b1	5UTR	14	2	0.143	12	2	0.167	15	2	0.133	0.147667
chr1	164458325	-	NM_009721	Atp1b1	5UTR	18	2	0.111	17	2	0.118	11	2	0.182	0.137
chr1	165194273	-	NM_145512	Sft2d2	startC	18	5	0.278	15	2	0.133	11	3	0.273	0.228
chr1	165194281	-	NM_145512	Sft2d2	startC	18	2	0.111	12	2	0.167	11	2	0.182	0.153333
chr1	165194293	-	NM_145512	Sft2d2	startC	13	2	0.154	13	2	0.154	12	4	0.333	0.213667
chr1	165194297	-	NM_145512	Sft2d2	startC	13	4	0.308	12	3	0.25	13	4	0.308	0.288667
chr1	165194303	-	NM_145512	Sft2d2	startC	12	3	0.25	11	3	0.273	12	4	0.333	0.285333
chr1	165194307	-	NM_145512	Sft2d2	startC	11	3	0.273	12	3	0.25	12	4	0.333	0.285333
chr1	165194308	-	NM_145512	Sft2d2	startC	12	5	0.417	12	4	0.333	12	5	0.417	0.389
chr1	165194309	-	NM_145512	Sft2d2	startC	12	3	0.25	12	3	0.25	11	4	0.364	0.288
chr1	166130501	+	NM_021610	Gpa33	startC	17	2	0.118	23	3	0.13	26	3	0.115	0.121
chr1	166130510	+	NM_021610	Gpa33	startC	18	2	0.111	0	0	0	0	0	0	#
chr1	166130561	+	NM_021610	Gpa33	startC	10	2	0.2	15	2	0.133	10	1	0.1	0.144333
chr1	166165245	+	NM_021610	Gpa33	stopC	16	4	0.25	0	0	0	0	0	0	#
chr1	166165259	+	NM_021610	Gpa33	stopC	15	4	0.267	12	4	0.333	0	0	0	#
chr1	166166189	+	NM_021610	Gpa33	3UTR	22	5	0.227	0	0	0	0	0	0	#
chr1	167350384	+	NM_019993	Aldh9a1	startC	23	3	0.13	27	3	0.111	14	3	0.214	0.151667
chr1	167350414	+	NM_019993	Aldh9a1	startC	14	2	0.143	16	2	0.125	13	2	0.154	0.140667
chr1	171129379	-	NM_025321	Sdhc	3UTR	11	3	0.273	11	3	0.273	10	3	0.3	0.282
chr1	171518214	-	NM_010584	Itln1	stopC	68	23	0.338	71	22	0.31	58	22	0.386	0.344667
chr1	171518385	-	NM_010584	Itln1	stopC	42	9	0.214	34	7	0.206	25	5	0.2	0.206667
chr1	171529155	-	NM_010584	Itln1	CDS	46	11	0.239	35	7	0.2	31	7	0.226	0.221667
chr1	172082876	+	NM_009938	Copa	startC	29	3	0.103	28	3	0.107	19	3	0.158	0.122667
chr1	172505175	+	NM_178598	Tagln2	startC	22	3	0.136	18	4	0.222	19	2	0.105	0.154333
chr1	178337020	-	NM_016805	Hnrnpu	CDS	22	8	0.364	0	0	0	0	0	0	#
chr1	178337411	-	NM_016805	Hnrnpu	startC	12	2	0.167	15	2	0.133	12	2	0.167	0.155667
chr1	178337422	-	NM_016805	Hnrnpu	startC	12	4	0.333	13	2	0.154	12	2	0.167	0.218
chr1	178337448	-	NM_016805	Hnrnpu	startC	12	3	0.25	0	0	0	0	0	0	#
chr1	178337452	-	NM_016805	Hnrnpu	startC	15	3	0.2	11	2	0.182	13	4	0.308	0.23
chr1	178337453	-	NM_016805	Hnrnpu	startC	16	3	0.188	13	3	0.231	14	3	0.214	0.211
chr1	178337460	-	NM_016805	Hnrnpu	startC	16	6	0.375	12	5	0.417	14	5	0.357	0.383
chr1	178337463	-	NM_016805	Hnrnpu	startC	15	2	0.133	12	2	0.167	13	2	0.154	0.151333
chr1	178337624	-	NM_016805	Hnrnpu	startC	17	2	0.118	17	2	0.118	12	2	0.167	0.134333
chr1	178337641	-	NM_016805	Hnrnpu	startC	25	3	0.12	19	3	0.158	17	4	0.235	0.171
chr1	178337670	-	NM_016805	Hnrnpu	startC	14	3	0.214	0	0	0	0	0	0	#
chr1	181211650	-	NM_145514	Wdr26	5UTR	18	2	0.111	19	2	0.105	15	3	0.2	0.138667
chr1	181211651	-	NM_145514	Wdr26	5UTR	19	2	0.105	20	3	0.15	16	4	0.25	0.168333
chr1	181211666	-	NM_145514	Wdr26	5UTR	22	3	0.136	22	3	0.136	17	2	0.118	0.13
chr1	184822532	-	NM_133684	Marc2	CDS	45	9	0.2	0	0	0	40	9	0.225	#
chr1	184845670	-	NM_133684	Marc2	startC	40	6	0.15	27	3	0.111	28	3	0.107	0.122667
chr1	184882848	-	NM_178692	C130074G19Rik	startC	23	3	0.13	0	0	0	0	0	0	#
chr1	184882852	-	NM_178692	C130074G19Rik	startC	23	4	0.174	18	3	0.167	16	4	0.286	0.209
chr1	184882856	-	NM_178692	C130074G19Rik	startC	22	5	0.227	0	0	0	0	0	0	#
chr1	185332211	+	NM_011794	Bpnt1	5UTR	16	2	0.125	19	4	0.211	21	4	0.19	0.175333
chr1	185332224	+	NM_011794	Bpnt1	5UTR	14	2	0.143	16	2	0.125	18	3	0.167	0.145
chr1	191718485	+	NM_001134829	Lpgat1	startC	15	2	0.133	19	3	0.158	17	5	0.294	0.195
chr1	191718513	+	NM_001134829	Lpgat1	startC	21	3	0.143	21	3	0.143	17	2	0.118	0.134667
chr1	191718555	+	NM_001134829	Lpgat1	startC	47	6	0.128	39	5	0.128	31	7	0.226	0.160667
chr1	191718566	+	NM_001134829	Lpgat1	startC	45	5	0.111	37	4	0.108	33	5	0.152	0.123667
chr1	191718587	+	NM_001134829	Lpgat1	startC	25	5	0.2	0	0	0	19	3	0.158	#
chr1	193153253	+	NM_016851	Irf6	5UTR	19	2	0.105	0	0	0	0	0	0	#
chr1	193153284	+	NM_016851	Irf6	5UTR	19	3	0.158	19	3	0.158	12	2	0.167	0.161
chr1	34877543	+	NM_145516	Plekhb2	3UTR	0	0	0	11	3	0.273	0	0	0	#
chr1	37442492	-	NM_173870	Mgat4a	3UTR	0	0	0	11	4	0.364	0	0	0	#
chr1	43056629	-	NM_001013025	Tgfbrap1	CDS	0	0	0	12	5	0.417	0	0	0	#
chr1	65165146	-	NM_010497	Idh1	CDS	0	0	0	13	5	0.385	0	0	0	#
chr1	67166395	+	NM_001080809	Cps1	CDS	0	0	0	81	14	0.173	0	0	0	#
chr1	74421321	+	NM_009509	Vil1	CDS	0	0	0	28	6	0.214	0	0	0	#
chr1	74422983	+	NM_009509	Vil1	CDS	0	0	0	44	8	0.182	0	0	0	#
chr1	74427269	+	NM_009509	Vil1	CDS	0	0	0	54	8	0.148	0	0	0	#
chr1	74428113	+	NM_009509	Vil1	CDS	0	0	0	60	11	0.183	51	9	0.18	#
chr1	74435027	+	NM_009509	Vil1	stopC	0	0	0	27	5	0.185	29	5	0.172	#
chr1	80340252	-	NM_016716	Cul3	startC	0	0	0	12	2	0.167	0	0	0	#
chr1	86526826	+	NM_008972	Ptma	startC	0	0	0	27	4	0.148	0	0	0	#
chr1	93413535	-	NM_133808	Hdlbp	CDS	0	0	0	29	8	0.276	0	0	0	#
chr1	128294238	-	NM_001081078	Lct	CDS	0	0	0	42	7	0.167	0	0	0	#
chr1	128295164	-	NM_001081078	Lct	CDS	0	0	0	32	7	0.219	23	6	0.261	#
chr1	128298479	-	NM_001081078	Lct	CDS	0	0	0	32	7	0.219	0	0	0	#
chr1	128299994	-	NM_001081078	Lct	CDS	0	0	0	26	6	0.231	18	5	0.278	#
chr1	128300329	-	NM_001081078	Lct	CDS	0	0	0	55	9	0.164	0	0	0	#
chr1	128303937	-	NM_001081078	Lct	CDS	0	0	0	22	6	0.286	0	0	0	#
chr1	128307927	-	NM_001081078	Lct	CDS	0	0	0	23	6	0.261	29	8	0.276	#
chr1	130841808	+	NM_011082	Pigr	CDS	0	0	0	53	8	0.151	0	0	0	#
chr1	130845023	+	NM_011082	Pigr	CDS	0	0	0	17	5	0.294	0	0	0	#
chr1	130851544	+	NM_011082	Pigr	3UTR	0	0	0	23	4	0.174	15	5	0.333	#
chr1	130851567	+	NM_011082	Pigr	3UTR	0	0	0	21	4	0.19	0	0	0	#
chr1	135253718	-	NM_007921	Elf3	3UTR	0	0	0	18	4	0.222	18	4	0.222	#
chr1	135256023	-	NM_007921	Elf3	CDS	0	0	0	17	5	0.294	0	0	0	#
chr1	135257051	-	NM_007921	Elf3	CDS	0	0	0	18	5	0.278	0	0	0	#
chr1	135827202	+	NM_133664	Lad1	CDS	0	0	0	10	4	0.4	0	0	0	#
chr1	135830924	+	NM_133664	Lad1	CDS	0	0	0	28	6	0.214	0	0	0	#
chr1	164437586	-	NM_009721	Atp1b1	3UTR	0	0	0	42	6	0.146	0	0	0	#
chr1	164453610	-	NM_009721	Atp1b1	CDS	0	0	0	31	7	0.226	0	0	0	#
chr1	164458040	-	NM_009721	Atp1b1	startC	0	0	0	36	5	0.139	34	4	0.118	#
chr1	166165170	+	NM_021610	Gpa33	stopC	0	0	0	18	5	0.278	0	0	0	#
chr1	171129350	-	NM_025321	Sdhc	3UTR	0	0	0	10	3	0.3	0	0	0	#
chr1	171534815	-	NM_010584	Itln1	startC	0	0	0	15	2	0.133	0	0	0	#
chr1	172113049	+	NM_009938	Copa	CDS	0	0	0	17	6	0.353	0	0	0	#
chr1	172491876	+	NM_033608	Igsf9	CDS	0	0	0	11	5	0.455	0	0	0	#
chr1	172494482	+	NM_033608	Igsf9	CDS	0	0	0	10	4	0.4	0	0	0	#
chr1	172505928	+	NM_178598	Tagln2	CDS	0	0	0	16	5	0.312	0	0	0	#
chr1	178332115	-	NM_016805	Hnrnpu	CDS	0	0	0	10	5	0.5	16	6	0.375	#
chr1	178337622	-	NM_016805	Hnrnpu	startC	0	0	0	17	2	0.118	0	0	0	#
chr1	185354036	+	NM_011794	Bpnt1	CDS	0	0	0	17	5	0.294	0	0	0	#
chr1	191781128	+	NM_172266	Lpgat1	3UTR	0	0	0	21	5	0.238	0	0	0	#
chr1	10232499	-	NM_001102430	Arfgef1	startC	0	0	0	0	0	0	16	2	0.125	#
chr1	34863495	+	NM_145516	Plekhb2	CDS	0	0	0	0	0	0	57	8	0.14	#
chr1	36068809	+	NM_015818	Hs6st1	startC	0	0	0	0	0	0	10	2	0.2	#
chr1	36268673	-	NM_153408	Neurl3	CDS	0	0	0	0	0	0	11	4	0.364	#
chr1	36939364	-	NM_018872	Tmem131	startC	0	0	0	0	0	0	12	2	0.167	#
chr1	37443070	-	NM_173870	Mgat4a	3UTR	0	0	0	0	0	0	12	3	0.25	#
chr1	63164954	-	NM_145518	Ndufs1	CDS	0	0	0	0	0	0	11	4	0.364	#
chr1	64731686	-	NM_022721	Fzd5	3UTR	0	0	0	0	0	0	11	3	0.273	#
chr1	74284564	-	NM_146110	Aamp	startC	0	0	0	0	0	0	10	1	0.1	#
chr1	74419876	+	NM_009509	Vil1	CDS	0	0	0	0	0	0	42	7	0.167	#
chr1	74421873	+	NM_009509	Vil1	CDS	0	0	0	0	0	0	28	9	0.333	#
chr1	74428199	+	NM_009509	Vil1	CDS	0	0	0	0	0	0	44	9	0.205	#
chr1	74435028	+	NM_009509	Vil1	stopC	0	0	0	0	0	0	15	4	0.267	#
chr1	74951344	-	NM_010544	Ihh	startC	0	0	0	0	0	0	11	2	0.182	#
chr1	75140929	-	NM_026977	Cnppd1	CDS	0	0	0	0	0	0	10	4	0.4	#
chr1	75315373	-	NM_016878	Dnpep	CDS	0	0	0	0	0	0	11	4	0.364	#
chr1	87101087	-	NM_001081082	Alpi	CDS	0	0	0	0	0	0	25	6	0.25	#
chr1	93635347	-	NM_021537	Stk25	startC	0	0	0	0	0	0	16	2	0.125	#
chr1	106780003	-	NM_009190	Vps4b	CDS	0	0	0	0	0	0	18	6	0.333	#
chr1	125435414	-	NM_023735	Actr3	startC	0	0	0	0	0	0	12	2	0.182	#
chr1	127930886	+	NM_178690	Rab3gap1	CDS	0	0	0	0	0	0	16	5	0.312	#
chr1	128294283	-	NM_001081078	Lct	CDS	0	0	0	0	0	0	27	6	0.222	#
chr1	130841557	+	NM_011082	Pigr	CDS	0	0	0	0	0	0	16	5	0.312	#
chr1	130841787	+	NM_011082	Pigr	CDS	0	0	0	0	0	0	35	7	0.206	#
chr1	130844618	+	NM_011082	Pigr	CDS	0	0	0	0	0	0	19	6	0.316	#
chr1	130844985	+	NM_011082	Pigr	CDS	0	0	0	0	0	0	76	11	0.145	#
chr1	130847263	+	NM_011082	Pigr	CDS	0	0	0	0	0	0	12	5	0.417	#
chr1	130847496	+	NM_011082	Pigr	CDS	0	0	0	0	0	0	85	11	0.129	#
chr1	130849578	+	NM_011082	Pigr	CDS	0	0	0	0	0	0	26	6	0.231	#
chr1	130851991	+	NM_011082	Pigr	3UTR	0	0	0	0	0	0	11	4	0.364	#
chr1	133131690	+	NM_133819	Ppp1r15b	startC	0	0	0	0	0	0	22	3	0.136	#
chr1	133661313	-	NM_144530	Zc3h11a	5UTR	0	0	0	0	0	0	10	2	0.2	#
chr1	134078951	-	NM_007570	Btg2	startC	0	0	0	0	0	0	10	1	0.1	#
chr1	135254007	-	NM_007921	Elf3	3UTR	0	0	0	0	0	0	29	5	0.172	#
chr1	135254160	-	NM_007921	Elf3	stopC	0	0	0	0	0	0	30	8	0.267	#
chr1	135254190	-	NM_007921	Elf3	stopC	0	0	0	0	0	0	15	4	0.267	#
chr1	135254274	-	NM_007921	Elf3	stopC	0	0	0	0	0	0	14	6	0.429	#
chr1	156040961	+	NM_022329	Tor1aip2	5UTR	0	0	0	0	0	0	12	2	0.167	#
chr1	164458070	-	NM_009721	Atp1b1	5UTR	0	0	0	0	0	0	15	2	0.133	#
chr1	164458091	-	NM_009721	Atp1b1	5UTR	0	0	0	0	0	0	27	3	0.111	#
chr1	164458185	-	NM_009721	Atp1b1	5UTR	0	0	0	0	0	0	24	3	0.125	#
chr1	166157600	+	NM_021610	Gpa33	CDS	0	0	0	0	0	0	18	5	0.278	#
chr1	171129590	-	NM_025321	Sdhc	3UTR	0	0	0	0	0	0	12	4	0.333	#
chr1	172117257	+	NM_009938	Copa	CDS	0	0	0	0	0	0	21	6	0.286	#
chr1	172505270	+	NM_178598	Tagln2	startC	0	0	0	0	0	0	10	1	0.1	#
chr1	183332923	-	NM_177389	Mia3	CDS	0	0	0	0	0	0	18	5	0.278	#
chr1	184822376	-	NM_133684	Marc2	CDS	0	0	0	0	0	0	55	9	0.164	#
chr1	184841358	-	NM_133684	Marc2	CDS	0	0	0	0	0	0	19	5	0.263	#
chr1	184845674	-	NM_133684	Marc2	startC	0	0	0	0	0	0	27	6	0.222	#
chr1	185338214	+	NM_011794	Bpnt1	startC	0	0	0	0	0	0	20	2	0.1	#
chr1	191183119	-	NM_007498	Atf3	5UTR	0	0	0	0	0	0	16	2	0.125	#
chr1	191718486	+	NM_001134829	Lpgat1	startC	0	0	0	0	0	0	17	2	0.118	#
chr1	191781179	+	NM_172266	Lpgat1	3UTR	0	0	0	0	0	0	34	5	0.152	#
chr2	154689532	+	NM_029362	Chmp4b	CDS	38	8	0.211	30	7	0.233	26	6	0.231	0.225
chr2	155826444	-	NM_010579	Eif6	startC	18	4	0.222	18	3	0.167	13	4	0.308	0.232333
chr2	156179894	-	NM_133242	Rbm39	5UTR	17	2	0.118	10	1	0.111	13	2	0.154	0.127667
chr2	156179921	-	NM_133242	Rbm39	5UTR	16	3	0.188	10	2	0.2	13	2	0.154	0.180667
chr2	156179929	-	NM_133242	Rbm39	5UTR	10	2	0.2	0	0	0	0	0	0	#
chr2	156311915	-	NM_020255	Scand1	stopC	20	5	0.25	16	5	0.312	0	0	0	#
chr2	156312197	-	NM_020255	Scand1	startC	18	3	0.167	12	2	0.167	13	2	0.154	0.162667
chr2	156312216	-	NM_020255	Scand1	startC	28	3	0.107	23	3	0.13	19	2	0.105	0.114
chr2	156312280	-	NM_020255	Scand1	startC	19	2	0.105	14	2	0.143	24	3	0.125	0.124333
chr2	156312302	-	NM_020255	Scand1	startC	11	2	0.182	16	2	0.125	16	3	0.188	0.165
chr2	156312303	-	NM_020255	Scand1	startC	12	2	0.167	16	2	0.133	16	3	0.188	0.162667
chr2	156312311	-	NM_020255	Scand1	startC	12	2	0.167	15	2	0.133	16	2	0.125	0.141667
chr2	157325814	+	NM_019642	Rpn2	stopC	22	6	0.273	16	5	0.312	16	7	0.438	0.341
chr2	162934570	+	NM_026499	Srsf6	stopC	13	5	0.385	0	0	0	0	0	0	#
chr2	163547354	+	NM_008261	Hnf4a	startC	18	5	0.278	21	4	0.19	18	5	0.278	0.248667
chr2	163572141	+	NM_008261	Hnf4a	3UTR	23	6	0.261	0	0	0	0	0	0	#
chr2	163636908	-	NM_012032	Serinc3	CDS	14	5	0.357	0	0	0	0	0	0	#
chr2	163725543	+	NM_011106	Pkig	stopC	20	5	0.25	16	4	0.25	0	0	0	#
chr2	163731163	-	NM_007398	Ada	CDS	79	12	0.152	82	11	0.134	78	10	0.128	0.138
chr2	163732323	-	NM_007398	Ada	CDS	69	11	0.159	0	0	0	64	10	0.156	#
chr2	163732333	-	NM_007398	Ada	CDS	77	14	0.182	65	15	0.234	70	12	0.171	0.195667
chr2	163732341	-	NM_007398	Ada	CDS	78	12	0.154	0	0	0	0	0	0	#
chr2	163732868	-	NM_007398	Ada	CDS	33	8	0.242	32	7	0.219	0	0	0	#
chr2	163995275	+	NM_018753	Ywhab	5UTR	18	2	0.111	10	1	0.1	10	2	0.2	0.137
chr2	165276665	-	NM_144893	Slc35c2	3UTR	11	3	0.273	11	3	0.273	11	4	0.364	0.303333
chr2	165276676	-	NM_144893	Slc35c2	3UTR	12	4	0.333	0	0	0	0	0	0	#
chr2	165277214	-	NM_144893	Slc35c2	stopC	22	7	0.318	0	0	0	0	0	0	#
chr2	168230218	-	NM_010072	Dpm1	startC	13	3	0.231	15	2	0.133	11	3	0.273	0.212333
chr2	168652686	-	NM_015731	Atp9a	CDS	20	6	0.3	0	0	0	0	0	0	#
chr2	174330126	+	NM_201616	Gnas	startC	19	3	0.158	11	2	0.182	14	3	0.214	0.184667
chr2	174330136	+	NM_201616	Gnas	startC	19	4	0.211	11	2	0.182	13	2	0.154	0.182333
chr2	174330210	+	NM_201616	Gnas	startC	17	2	0.118	20	2	0.1	16	3	0.188	0.135333
chr2	174330212	+	NM_201616	Gnas	startC	14	2	0.143	18	2	0.111	17	2	0.118	0.124
chr2	174330213	+	NM_201616	Gnas	startC	15	2	0.133	16	2	0.125	15	2	0.133	0.130333
chr2	174330248	+	NM_201616	Gnas	startC	20	2	0.1	19	2	0.105	20	2	0.1	0.101667
chr2	174330283	+	NM_201616	Gnas	startC	25	3	0.12	28	5	0.179	24	3	0.125	0.141333
chr2	174330289	+	NM_201616	Gnas	startC	24	3	0.125	25	3	0.12	24	4	0.167	0.137333
chr2	174330328	+	NM_201616	Gnas	startC	19	3	0.158	19	2	0.105	15	2	0.133	0.132
chr2	174330337	+	NM_201616	Gnas	startC	24	4	0.167	26	4	0.154	16	4	0.25	0.190333
chr2	174330353	+	NM_201616	Gnas	startC	29	3	0.103	30	3	0.1	28	5	0.179	0.127333
chr2	174330355	+	NM_201616	Gnas	startC	31	7	0.226	28	6	0.222	30	6	0.2	0.216
chr2	174330364	+	NM_201616	Gnas	startC	29	5	0.172	28	3	0.107	33	6	0.182	0.153667
chr2	174330380	+	NM_201616	Gnas	startC	19	2	0.105	17	2	0.118	16	2	0.125	0.116
chr2	174330403	+	NM_201616	Gnas	startC	14	2	0.143	14	3	0.214	11	2	0.182	0.179667
chr2	174345531	+	NM_010309	Gnas	CDS	10	4	0.4	0	0	0	0	0	0	#
chr2	174427745	-	NM_022325	Ctsz	stopC	28	5	0.179	0	0	0	0	0	0	#
chr2	174461168	-	NM_025983	Atp5e	3UTR	36	8	0.222	23	4	0.174	22	4	0.182	0.192667
chr2	174463969	-	NM_025983	Atp5e	startC	16	3	0.188	14	4	0.286	12	2	0.182	0.218667
chr2	174463974	-	NM_025983	Atp5e	startC	15	4	0.267	14	2	0.143	12	3	0.25	0.22
chr2	174463985	-	NM_025983	Atp5e	startC	16	5	0.312	13	5	0.385	11	3	0.273	0.323333
chr2	174463989	-	NM_025983	Atp5e	startC	17	3	0.176	13	2	0.154	11	4	0.364	0.231333
chr2	174463998	-	NM_025983	Atp5e	startC	20	4	0.2	13	2	0.154	13	2	0.154	0.169333
chr2	174464007	-	NM_025983	Atp5e	startC	40	6	0.15	37	5	0.135	24	3	0.125	0.136667
chr2	174464009	-	NM_025983	Atp5e	startC	38	5	0.132	35	4	0.118	25	4	0.16	0.136667
chr2	174464010	-	NM_025983	Atp5e	startC	43	9	0.209	38	8	0.211	29	4	0.138	0.186
chr2	174464015	-	NM_025983	Atp5e	startC	40	5	0.125	38	7	0.184	29	3	0.103	0.137333
chr2	174464018	-	NM_025983	Atp5e	startC	38	5	0.132	34	6	0.176	28	3	0.107	0.138333
chr2	174464019	-	NM_025983	Atp5e	startC	39	4	0.103	39	5	0.128	29	4	0.138	0.123
chr2	174464033	-	NM_025983	Atp5e	startC	30	6	0.2	35	5	0.143	24	5	0.208	0.183667
chr2	174464036	-	NM_025983	Atp5e	startC	34	4	0.118	31	6	0.2	21	5	0.238	0.185333
chr2	181520679	+	NM_016775	Dnajc5	5UTR	14	5	0.357	12	5	0.417	12	3	0.25	0.341333
chr2	181520691	+	NM_016775	Dnajc5	5UTR	14	3	0.214	12	5	0.417	11	5	0.455	0.362
chr2	4938384	+	NM_010726	Phyh	stopC	35	7	0.2	23	7	0.304	0	0	0	#
chr2	5027167	-	NM_181848	Optn	CDS	31	7	0.226	0	0	0	0	0	0	#
chr2	10056139	-	NM_020615	Atp5c1	3UTR	39	5	0.128	24	4	0.167	0	0	0	#
chr2	13574984	+	NM_011701	Vim	CDS	19	5	0.263	0	0	0	0	0	0	#
chr2	22895724	+	NM_019501	Pdss1	startC	20	3	0.15	16	3	0.2	16	4	0.25	0.2
chr2	25557892	+	ENSMUST00000015236	Edf1	startC	19	3	0.158	0	0	0	0	0	0	#
chr2	26604044	-	NM_026212	Agpat2	startC	18	3	0.167	14	3	0.214	10	1	0.1	0.160333
chr2	26604058	-	NM_026212	Agpat2	startC	18	4	0.222	14	4	0.286	15	6	0.4	0.302667
chr2	26604099	-	NM_026212	Agpat2	startC	19	3	0.158	10	1	0.1	14	4	0.286	0.181333
chr2	26604177	-	NM_026212	Agpat2	startC	16	4	0.25	11	2	0.182	11	2	0.182	0.204667
chr2	26924506	-	NM_011512	Surf4	CDS	41	7	0.171	0	0	0	0	0	0	#
chr2	26933333	-	NM_011512	Surf4	startC	53	10	0.189	60	7	0.117	49	6	0.122	0.142667
chr2	26933356	-	NM_011512	Surf4	startC	48	5	0.104	44	5	0.114	40	4	0.1	0.106
chr2	26933397	-	NM_011512	Surf4	startC	18	5	0.278	11	2	0.182	13	2	0.154	0.204667
chr2	26933407	-	NM_011512	Surf4	startC	17	2	0.118	11	2	0.182	14	2	0.143	0.147667
chr2	29802885	+	NM_011989	Slc27a4	5UTR	46	5	0.111	29	3	0.103	28	4	0.143	0.119
chr2	29802912	+	NM_011989	Slc27a4	5UTR	29	4	0.138	17	3	0.176	10	2	0.2	0.171333
chr2	29802941	+	NM_011989	Slc27a4	5UTR	19	2	0.105	27	4	0.148	18	3	0.167	0.14
chr2	29802944	+	NM_011989	Slc27a4	5UTR	19	3	0.158	0	0	0	0	0	0	#
chr2	29815696	+	NM_011989	Slc27a4	stopC	21	5	0.238	0	0	0	0	0	0	#
chr2	29815862	+	NM_011989	Slc27a4	stopC	18	9	0.5	0	0	0	15	4	0.267	#
chr2	32287992	-	NM_175190	Swi5	5UTR	21	3	0.143	14	2	0.154	12	2	0.167	0.154667
chr2	32303219	+	NM_133852	Golga2	CDS	26	7	0.269	0	0	0	0	0	0	#
chr2	34772132	+	NM_022310	Hspa5	startC	12	3	0.25	0	0	0	0	0	0	#
chr2	34772178	+	NM_022310	Hspa5	startC	17	2	0.118	13	2	0.154	17	3	0.176	0.149333
chr2	34774290	+	NM_022310	Hspa5	CDS	47	9	0.191	0	0	0	35	8	0.229	#
chr2	34775969	+	NM_022310	Hspa5	stopC	17	5	0.294	0	0	0	0	0	0	#
chr2	34775973	+	NM_022310	Hspa5	stopC	18	4	0.222	0	0	0	17	5	0.294	#
chr2	52399613	-	NM_182994	Arl5a	3UTR	19	4	0.211	0	0	0	0	0	0	#
chr2	52399640	-	NM_182994	Arl5a	3UTR	13	4	0.308	0	0	0	0	0	0	#
chr2	57238543	+	NM_010274	Gpd2	5UTR	10	3	0.3	10	1	0.1	10	2	0.2	0.2
chr2	57368722	+	NM_010274	Gpd2	3UTR	14	5	0.357	14	4	0.286	10	3	0.3	0.314333
chr2	59161087	+	NM_026361	Pkp4	5UTR	14	3	0.214	12	2	0.167	15	2	0.133	0.171333
chr2	59161111	+	NM_026361	Pkp4	5UTR	10	1	0.1	12	4	0.333	17	3	0.176	0.203
chr2	63977056	-	NM_021716	Fign	3UTR	28	5	0.179	31	8	0.258	0	0	0	#
chr2	63977073	-	NM_021716	Fign	3UTR	42	6	0.143	39	6	0.154	31	8	0.258	0.185
chr2	68861574	+	NM_172856	Cers6	startC	17	2	0.118	14	4	0.286	14	3	0.214	0.206
chr2	68861659	+	NM_172856	Cers6	startC	10	2	0.2	0	0	0	0	0	0	#
chr2	71857632	+	NM_008397	Itga6	3UTR	10	3	0.3	0	0	0	10	3	0.3	#
chr2	73911007	-	NM_175015	Atp5g3	startC	70	8	0.114	61	7	0.115	50	8	0.16	0.129667
chr2	73911008	-	NM_175015	Atp5g3	startC	70	9	0.129	60	9	0.15	50	9	0.18	0.153
chr2	73911259	-	NM_175015	Atp5g3	5UTR	65	11	0.169	55	6	0.109	49	10	0.204	0.160667
chr2	73911269	-	NM_175015	Atp5g3	5UTR	63	7	0.111	56	6	0.107	48	7	0.146	0.121333
chr2	84650426	-	NM_007615	Ctnnd1	5UTR	15	3	0.2	0	0	0	0	0	0	#
chr2	84650520	-	NM_007615	Ctnnd1	5UTR	98	10	0.102	82	12	0.146	65	11	0.169	0.139
chr2	90847325	+	NM_019758	Mtch2	startC	15	2	0.133	14	3	0.214	11	2	0.182	0.176333
chr2	90847338	+	NM_019758	Mtch2	startC	14	3	0.214	13	2	0.154	10	1	0.1	0.156
chr2	93420581	-	NM_007656	Cd82	CDS	28	7	0.25	29	7	0.241	0	0	0	#
chr2	93462361	-	NM_007656	Cd82	5UTR	14	6	0.429	17	4	0.235	15	6	0.4	0.354667
chr2	93462378	-	NM_007656	Cd82	5UTR	19	3	0.158	22	3	0.136	19	2	0.105	0.133
chr2	93462379	-	NM_007656	Cd82	5UTR	19	4	0.211	21	3	0.143	18	3	0.167	0.173667
chr2	103456885	-	NM_009804	Cat	CDS	35	10	0.286	0	0	0	0	0	0	#
chr2	103485021	-	NM_009804	Cat	startC	15	4	0.267	12	2	0.167	11	2	0.182	0.205333
chr2	109917820	+	NM_172671	Lgr4	5UTR	12	2	0.167	20	2	0.1	10	1	0.1	0.122333
chr2	109917836	+	NM_172671	Lgr4	5UTR	15	3	0.2	20	5	0.25	13	3	0.231	0.227
chr2	109917838	+	NM_172671	Lgr4	5UTR	14	4	0.286	21	3	0.143	13	3	0.231	0.22
chr2	109917845	+	NM_172671	Lgr4	5UTR	15	5	0.333	20	3	0.15	12	2	0.167	0.216667
chr2	109917929	+	NM_172671	Lgr4	startC	17	3	0.176	16	3	0.188	11	2	0.182	0.182
chr2	109917938	+	NM_172671	Lgr4	startC	17	2	0.118	16	2	0.125	13	2	0.154	0.132333
chr2	109917946	+	NM_172671	Lgr4	startC	17	2	0.118	17	3	0.176	13	2	0.154	0.149333
chr2	109917960	+	NM_172671	Lgr4	startC	15	2	0.133	13	3	0.231	14	2	0.143	0.169
chr2	109918001	+	NM_172671	Lgr4	startC	10	2	0.2	12	3	0.25	14	3	0.214	0.221333
chr2	109918008	+	NM_172671	Lgr4	startC	10	2	0.2	12	5	0.417	14	2	0.143	0.253333
chr2	109918016	+	NM_172671	Lgr4	startC	10	1	0.1	13	3	0.231	14	3	0.214	0.181667
chr2	112455250	+	NM_133749	Emc7	startC	18	2	0.111	15	3	0.2	11	2	0.182	0.164333
chr2	112455266	+	NM_133749	Emc7	startC	19	4	0.211	16	3	0.188	11	2	0.182	0.193667
chr2	119137378	-	NM_001033136	Rmdn3	3UTR	17	4	0.235	0	0	0	0	0	0	#
chr2	119138367	-	NM_001033136	Rmdn3	CDS	10	4	0.4	0	0	0	0	0	0	#
chr2	119229624	-	NM_028104	Ppp1r14d	startC	13	3	0.231	18	4	0.222	18	3	0.167	0.206667
chr2	119229631	-	NM_028104	Ppp1r14d	startC	14	2	0.143	18	3	0.167	17	2	0.118	0.142667
chr2	119229720	-	NM_028104	Ppp1r14d	startC	27	5	0.185	24	4	0.167	29	4	0.138	0.163333
chr2	119229723	-	NM_028104	Ppp1r14d	startC	27	4	0.148	25	3	0.12	31	7	0.226	0.164667
chr2	119229728	-	NM_028104	Ppp1r14d	startC	28	8	0.286	24	5	0.208	29	9	0.31	0.268
chr2	119237880	+	NM_016907	Spint1	startC	28	3	0.107	26	4	0.154	20	2	0.1	0.120333
chr2	119237898	+	NM_016907	Spint1	startC	24	4	0.167	23	3	0.13	19	3	0.158	0.151667
chr2	119237901	+	NM_016907	Spint1	startC	25	4	0.16	24	3	0.125	20	6	0.3	0.195
chr2	119237911	+	NM_016907	Spint1	startC	21	3	0.143	16	2	0.125	19	2	0.105	0.124333
chr2	119245174	+	NM_016907	Spint1	CDS	17	6	0.353	21	6	0.286	0	0	0	#
chr2	119245213	+	NM_016907	Spint1	CDS	18	5	0.278	0	0	0	0	0	0	#
chr2	121358878	+	NM_009897	Ckmt1	startC	22	5	0.227	15	2	0.133	12	2	0.167	0.175667
chr2	121358900	+	NM_009897	Ckmt1	startC	16	2	0.125	19	2	0.105	10	1	0.1	0.11
chr2	121358923	+	NM_009897	Ckmt1	startC	21	3	0.143	22	8	0.364	15	5	0.333	0.28
chr2	121358956	+	NM_009897	Ckmt1	startC	47	5	0.106	46	5	0.109	32	5	0.156	0.123667
chr2	121358995	+	NM_009897	Ckmt1	startC	49	7	0.143	41	7	0.171	34	4	0.118	0.144
chr2	121360970	+	NM_009897	Ckmt1	CDS	62	9	0.145	72	14	0.194	0	0	0	#
chr2	121360986	+	NM_009897	Ckmt1	CDS	54	8	0.148	0	0	0	38	8	0.211	#
chr2	121361221	+	NM_009897	Ckmt1	CDS	124	15	0.122	90	11	0.122	105	12	0.114	0.119333
chr2	121362689	+	NM_009897	Ckmt1	CDS	109	12	0.11	89	12	0.135	94	10	0.106	0.117
chr2	121362696	+	NM_009897	Ckmt1	CDS	81	13	0.16	73	12	0.164	0	0	0	#
chr2	121413988	+	NM_007952	Pdia3	startC	10	2	0.2	0	0	0	0	0	0	#
chr2	121414095	+	NM_007952	Pdia3	startC	23	3	0.13	0	0	0	0	0	0	#
chr2	121424630	+	NM_007952	Pdia3	CDS	32	7	0.219	0	0	0	0	0	0	#
chr2	121457137	+	NM_026318	Hypk	startC	20	4	0.2	21	3	0.143	17	2	0.118	0.153667
chr2	121457147	+	NM_026318	Hypk	startC	23	8	0.348	25	7	0.28	21	5	0.238	0.288667
chr2	121457173	+	NM_026318	Hypk	startC	15	3	0.2	13	2	0.154	10	1	0.1	0.151333
chr2	122147718	+	NM_009735	B2m	startC	28	5	0.179	0	0	0	0	0	0	#
chr2	122147755	+	NM_009735	B2m	startC	109	11	0.101	107	11	0.104	124	15	0.121	0.108667
chr2	122147789	+	NM_009735	B2m	startC	89	15	0.169	74	10	0.135	83	10	0.12	0.141333
chr2	122150976	+	NM_009735	B2m	CDS	19	5	0.263	0	0	0	0	0	0	#
chr2	122151102	+	NM_009735	B2m	CDS	69	9	0.13	0	0	0	46	8	0.174	#
chr2	122153038	+	NM_009735	B2m	3UTR	16	4	0.25	10	3	0.3	0	0	0	#
chr2	122153050	+	NM_009735	B2m	3UTR	18	7	0.389	11	7	0.636	15	5	0.333	0.452667
chr2	122702474	-	NM_011774	Slc30a4	startC	18	4	0.222	16	3	0.188	12	2	0.167	0.192333
chr2	125782626	-	NM_177608	Secisbp2l	startC	12	2	0.167	0	0	0	0	0	0	#
chr2	125782649	-	NM_177608	Secisbp2l	startC	15	3	0.2	11	4	0.364	10	1	0.1	0.221333
chr2	127705823	-	NM_145532	Mall	stopC	17	4	0.235	0	0	0	11	4	0.364	#
chr2	127729858	-	NM_145532	Mall	startC	13	2	0.154	19	4	0.211	10	1	0.1	0.155
chr2	143942325	+	NM_019771	Dstn	stopC	16	5	0.312	0	0	0	0	0	0	#
chr2	143942439	+	NM_019771	Dstn	3UTR	19	6	0.316	19	5	0.263	22	4	0.182	0.253667
chr2	143947518	-	NM_024281	Rrbp1	3UTR	14	4	0.286	14	7	0.5	0	0	0	#
chr2	143947548	-	NM_024281	Rrbp1	3UTR	12	3	0.25	0	0	0	11	3	0.273	#
chr2	143950465	-	NM_024281	Rrbp1	CDS	85	13	0.153	0	0	0	0	0	0	#
chr2	143950471	-	NM_024281	Rrbp1	CDS	83	10	0.122	78	10	0.128	65	9	0.141	0.130333
chr2	143955140	-	NM_024281	Rrbp1	CDS	25	6	0.24	0	0	0	0	0	0	#
chr2	143956805	-	NM_024281	Rrbp1	CDS	37	7	0.194	41	9	0.22	0	0	0	#
chr2	143967518	-	NM_024281	Rrbp1	CDS	17	5	0.294	0	0	0	21	8	0.381	#
chr2	143988673	-	NM_024281	Rrbp1	CDS	26	6	0.231	0	0	0	0	0	0	#
chr2	143989025	-	NM_024281	Rrbp1	CDS	37	7	0.189	0	0	0	0	0	0	#
chr2	144011004	-	NM_024281	Rrbp1	5UTR	15	2	0.133	20	6	0.3	16	4	0.25	0.227667
chr2	144011060	-	NM_024281	Rrbp1	5UTR	19	6	0.316	12	5	0.417	11	2	0.182	0.305
chr2	144011116	-	NM_024281	Rrbp1	5UTR	24	3	0.125	24	5	0.208	18	4	0.222	0.185
chr2	148875234	-	NM_009976	Cst3	startC	10	2	0.2	10	3	0.3	10	6	0.6	0.366667
chr2	148875339	-	NM_009976	Cst3	startC	11	2	0.182	12	2	0.167	10	3	0.3	0.216333
chr2	152111161	+	NM_029688	Srxn1	3UTR	53	10	0.189	57	9	0.158	46	9	0.196	0.181
chr2	152324371	-	NM_019705	Rbck1	CDS	28	6	0.214	31	8	0.258	32	7	0.219	0.230333
chr2	152829879	-	NM_009743	Bcl2l1	startC	17	2	0.118	21	3	0.143	20	2	0.1	0.120333
chr2	152829880	-	NM_009743	Bcl2l1	startC	17	4	0.235	20	4	0.2	19	6	0.316	0.250333
chr2	152829881	-	NM_009743	Bcl2l1	startC	17	2	0.118	21	3	0.143	20	5	0.25	0.170333
chr2	152829887	-	NM_009743	Bcl2l1	startC	14	2	0.143	21	3	0.143	17	3	0.176	0.154
chr2	154657128	+	NM_029362	Chmp4b	startC	28	4	0.143	25	3	0.12	15	2	0.133	0.132
chr2	154657244	+	NM_029362	Chmp4b	startC	30	5	0.167	25	3	0.12	27	3	0.111	0.132667
chr2	154657266	+	NM_029362	Chmp4b	startC	32	6	0.188	25	3	0.12	26	7	0.269	0.192333
chr2	154657339	+	NM_029362	Chmp4b	startC	11	2	0.182	0	0	0	0	0	0	#
chr2	154657350	+	NM_029362	Chmp4b	startC	13	2	0.154	0	0	0	0	0	0	#
chr2	154689522	+	NM_029362	Chmp4b	CDS	37	9	0.243	0	0	0	0	0	0	#
chr2	5054579	-	NM_181848	Optn	startC	0	0	0	11	2	0.182	0	0	0	#
chr2	27677339	+	NM_011305	Rxra	startC	0	0	0	10	1	0.1	0	0	0	#
chr2	29815623	+	NM_011989	Slc27a4	stopC	0	0	0	19	5	0.263	0	0	0	#
chr2	29815653	+	NM_011989	Slc27a4	stopC	0	0	0	26	6	0.231	0	0	0	#
chr2	34775980	+	NM_022310	Hspa5	stopC	0	0	0	14	4	0.286	0	0	0	#
chr2	52399652	-	NM_182994	Arl5a	3UTR	0	0	0	10	4	0.4	0	0	0	#
chr2	68861593	+	NM_172856	Cers6	startC	0	0	0	10	1	0.1	0	0	0	#
chr2	73909235	-	NM_175015	Atp5g3	CDS	0	0	0	24	7	0.292	21	6	0.286	#
chr2	80580925	-	NM_016965	Nckap1	startC	0	0	0	10	1	0.1	0	0	0	#
chr2	84603655	-	NM_007615	Ctnnd1	CDS	0	0	0	14	5	0.357	0	0	0	#
chr2	93420582	-	NM_007656	Cd82	CDS	0	0	0	29	7	0.241	0	0	0	#
chr2	119142665	-	NM_001033136	Rmdn3	CDS	0	0	0	36	7	0.194	0	0	0	#
chr2	119142667	-	NM_001033136	Rmdn3	CDS	0	0	0	37	7	0.189	0	0	0	#
chr2	121360976	+	NM_009897	Ckmt1	CDS	0	0	0	79	10	0.127	0	0	0	#
chr2	121363504	+	NM_009897	Ckmt1	stopC	0	0	0	32	6	0.188	0	0	0	#
chr2	121363513	+	NM_009897	Ckmt1	stopC	0	0	0	41	6	0.146	37	6	0.167	#
chr2	121414091	+	NM_007952	Pdia3	startC	0	0	0	21	3	0.143	0	0	0	#
chr2	121450724	+	NM_011354	Serf2	stopC	0	0	0	39	7	0.179	35	6	0.171	#
chr2	121450733	+	NM_011354	Serf2	stopC	0	0	0	31	6	0.194	0	0	0	#
chr2	143947523	-	NM_024281	Rrbp1	3UTR	0	0	0	17	4	0.235	0	0	0	#
chr2	143947552	-	NM_024281	Rrbp1	3UTR	0	0	0	14	4	0.286	0	0	0	#
chr2	143964846	-	NM_024281	Rrbp1	CDS	0	0	0	18	5	0.294	0	0	0	#
chr2	156179922	-	NM_133242	Rbm39	5UTR	0	0	0	10	1	0.1	0	0	0	#
chr2	156311901	-	NM_020255	Scand1	stopC	0	0	0	17	5	0.294	0	0	0	#
chr2	157470776	+	NM_009271	Src	3UTR	0	0	0	15	4	0.267	0	0	0	#
chr2	158409934	+	NM_001291137	Ralgapb	5UTR	0	0	0	10	2	0.2	0	0	0	#
chr2	163569954	+	NM_008261	Hnf4a	stopC	0	0	0	16	5	0.312	0	0	0	#
chr2	163625517	-	NM_012032	Serinc3	stopC	0	0	0	16	4	0.25	0	0	0	#
chr2	163730036	-	NM_007398	Ada	CDS	0	0	0	27	6	0.222	0	0	0	#
chr2	163730498	-	NM_007398	Ada	CDS	0	0	0	40	7	0.175	0	0	0	#
chr2	165276854	-	NM_144893	Slc35c2	3UTR	0	0	0	20	5	0.25	0	0	0	#
chr2	174330144	+	NM_201616	Gnas	startC	0	0	0	11	2	0.182	0	0	0	#
chr2	174330204	+	NM_201616	Gnas	startC	0	0	0	30	3	0.1	0	0	0	#
chr2	174330253	+	NM_201616	Gnas	startC	0	0	0	24	3	0.125	0	0	0	#
chr2	174346001	+	NM_010309	Gnas	CDS	0	0	0	41	7	0.171	0	0	0	#
chr2	174461175	-	NM_025983	Atp5e	3UTR	0	0	0	22	4	0.182	23	5	0.217	#
chr2	4927391	+	NM_010726	Phyh	CDS	0	0	0	0	0	0	17	5	0.294	#
chr2	5054700	-	NM_181848	Optn	startC	0	0	0	0	0	0	11	3	0.273	#
chr2	25560166	+	NM_021519	Edf1	CDS	0	0	0	0	0	0	14	5	0.357	#
chr2	26604043	-	NM_026212	Agpat2	startC	0	0	0	0	0	0	11	2	0.182	#
chr2	26604048	-	NM_026212	Agpat2	startC	0	0	0	0	0	0	12	2	0.167	#
chr2	26604188	-	NM_026212	Agpat2	startC	0	0	0	0	0	0	15	2	0.133	#
chr2	26921970	-	NM_011512	Surf4	stopC	0	0	0	0	0	0	11	5	0.455	#
chr2	26933394	-	NM_011512	Surf4	startC	0	0	0	0	0	0	15	3	0.2	#
chr2	29802854	+	NM_011989	Slc27a4	5UTR	0	0	0	0	0	0	45	5	0.111	#
chr2	29802859	+	NM_011989	Slc27a4	5UTR	0	0	0	0	0	0	45	5	0.111	#
chr2	29802958	+	NM_011989	Slc27a4	5UTR	0	0	0	0	0	0	10	1	0.1	#
chr2	29805629	+	NM_011989	Slc27a4	CDS	0	0	0	0	0	0	24	6	0.25	#
chr2	29815616	+	NM_011989	Slc27a4	stopC	0	0	0	0	0	0	17	7	0.412	#
chr2	29815644	+	NM_011989	Slc27a4	stopC	0	0	0	0	0	0	26	6	0.231	#
chr2	29816380	+	NM_011989	Slc27a4	3UTR	0	0	0	0	0	0	12	4	0.333	#
chr2	30066564	+	NM_001204875	Set	5UTR	0	0	0	0	0	0	10	1	0.1	#
chr2	34775961	+	NM_022310	Hspa5	stopC	0	0	0	0	0	0	15	5	0.333	#
chr2	34775970	+	NM_022310	Hspa5	stopC	0	0	0	0	0	0	16	4	0.25	#
chr2	35295033	+	NM_146120	Gsn	CDS	0	0	0	0	0	0	21	6	0.286	#
chr2	38926319	-	NM_010264	Nr6a1	startC	0	0	0	0	0	0	11	3	0.273	#
chr2	57238520	+	NM_010274	Gpd2	5UTR	0	0	0	0	0	0	10	4	0.444	#
chr2	83644696	+	NM_026934	Zc3h15	startC	0	0	0	0	0	0	10	2	0.2	#
chr2	102814165	-	NM_009851	Cd44	stopC	0	0	0	0	0	0	23	5	0.217	#
chr2	109917848	+	NM_172671	Lgr4	5UTR	0	0	0	0	0	0	12	3	0.25	#
chr2	119142670	-	NM_001033136	Rmdn3	CDS	0	0	0	0	0	0	35	7	0.2	#
chr2	119229628	-	NM_028104	Ppp1r14d	startC	0	0	0	0	0	0	17	2	0.118	#
chr2	121358819	+	NM_009897	Ckmt1	startC	0	0	0	0	0	0	30	5	0.167	#
chr2	121358905	+	NM_009897	Ckmt1	startC	0	0	0	0	0	0	13	2	0.154	#
chr2	121358930	+	NM_009897	Ckmt1	startC	0	0	0	0	0	0	14	2	0.143	#
chr2	121358974	+	NM_009897	Ckmt1	startC	0	0	0	0	0	0	48	5	0.104	#
chr2	121360719	+	NM_009897	Ckmt1	CDS	0	0	0	0	0	0	88	10	0.114	#
chr2	121360978	+	NM_009897	Ckmt1	CDS	0	0	0	0	0	0	43	9	0.209	#
chr2	122151042	+	NM_009735	B2m	CDS	0	0	0	0	0	0	19	7	0.368	#
chr2	122151133	+	NM_009735	B2m	CDS	0	0	0	0	0	0	44	8	0.182	#
chr2	122449791	+	NM_172980	Slc28a2	CDS	0	0	0	0	0	0	11	5	0.455	#
chr2	143942405	+	NM_019771	Dstn	stopC	0	0	0	0	0	0	17	5	0.294	#
chr2	143948433	-	NM_024281	Rrbp1	CDS	0	0	0	0	0	0	16	5	0.312	#
chr2	143967479	-	NM_024281	Rrbp1	CDS	0	0	0	0	0	0	16	5	0.312	#
chr2	143973497	-	NM_024281	Rrbp1	CDS	0	0	0	0	0	0	24	6	0.25	#
chr2	144011094	-	NM_024281	Rrbp1	5UTR	0	0	0	0	0	0	13	2	0.154	#
chr2	144011136	-	NM_024281	Rrbp1	5UTR	0	0	0	0	0	0	16	2	0.125	#
chr2	154657117	+	NM_029362	Chmp4b	startC	0	0	0	0	0	0	10	1	0.1	#
chr2	154657308	+	NM_029362	Chmp4b	startC	0	0	0	0	0	0	12	3	0.25	#
chr2	155826438	-	NM_010579	Eif6	startC	0	0	0	0	0	0	11	2	0.182	#
chr2	156008973	+	NM_025516	Ergic3	CDS	0	0	0	0	0	0	16	5	0.312	#
chr2	156179905	-	NM_133242	Rbm39	5UTR	0	0	0	0	0	0	13	3	0.231	#
chr2	156311899	-	NM_020255	Scand1	stopC	0	0	0	0	0	0	14	4	0.286	#
chr2	156312266	-	NM_020255	Scand1	startC	0	0	0	0	0	0	19	2	0.105	#
chr2	157290703	+	NM_019642	Rpn2	CDS	0	0	0	0	0	0	16	5	0.312	#
chr2	157325807	+	NM_019642	Rpn2	stopC	0	0	0	0	0	0	20	5	0.25	#
chr2	163645043	-	NM_012032	Serinc3	startC	0	0	0	0	0	0	12	2	0.167	#
chr2	163730515	-	NM_007398	Ada	CDS	0	0	0	0	0	0	22	9	0.409	#
chr2	167503514	+	NM_030743	Rnf114	startC	0	0	0	0	0	0	16	2	0.125	#
chr2	167503518	+	NM_030743	Rnf114	startC	0	0	0	0	0	0	17	5	0.294	#
chr2	174330141	+	NM_201616	Gnas	startC	0	0	0	0	0	0	12	3	0.25	#
chr2	174330348	+	NM_201616	Gnas	startC	0	0	0	0	0	0	28	4	0.143	#
chr2	174330406	+	NM_201616	Gnas	startC	0	0	0	0	0	0	11	2	0.182	#
chr2	174330407	+	NM_201616	Gnas	startC	0	0	0	0	0	0	11	2	0.182	#
chr2	174463978	-	NM_025983	Atp5e	startC	0	0	0	0	0	0	11	2	0.182	#
chr2	174463981	-	NM_025983	Atp5e	startC	0	0	0	0	0	0	11	2	0.182	#
chr2	174469427	-	NM_025531	Slmo2	CDS	0	0	0	0	0	0	24	6	0.25	#
chr3	3634265	+	ENSMUST00000108394	Hnf4g	startC	16	3	0.188	18	2	0.111	16	2	0.125	0.141333
chr3	3642964	+	NM_013920	Hnf4g	CDS	24	7	0.292	0	0	0	17	5	0.294	#
chr3	3658211	+	NM_013920	Hnf4g	3UTR	24	5	0.208	0	0	0	19	4	0.211	#
chr3	9004412	-	NM_009412	Tpd52	startC	12	3	0.25	11	3	0.273	10	1	0.1	0.207667
chr3	16183328	+	NM_172677	Ythdf3	startC	28	3	0.107	20	3	0.15	16	3	0.188	0.148333
chr3	16183333	+	NM_172677	Ythdf3	startC	29	3	0.103	19	2	0.105	15	3	0.2	0.136
chr3	16183360	+	NM_172677	Ythdf3	startC	30	5	0.167	18	2	0.111	12	5	0.417	0.231667
chr3	28727453	+	NM_031197	Slc2a2	stopC	26	6	0.231	0	0	0	0	0	0	#
chr3	31097480	+	NM_011386	Skil	startC	20	3	0.15	14	3	0.214	12	4	0.333	0.232333
chr3	31097503	+	NM_011386	Skil	startC	16	3	0.188	15	3	0.2	10	2	0.2	0.196
chr3	31118569	+	NM_011386	Skil	stopC	27	8	0.296	26	7	0.269	24	9	0.375	0.313333
chr3	35754392	+	NM_029570	Atp11b	startC	13	2	0.154	0	0	0	0	0	0	#
chr3	62377603	+	NM_001081295	Arhgef26	CDS	13	5	0.385	0	0	0	0	0	0	#
chr3	63345248	+	NM_008604	Mme	CDS	18	5	0.278	0	0	0	0	0	0	#
chr3	72943511	-	NM_001081137	Sis	CDS	43	8	0.186	0	0	0	0	0	0	#
chr3	88502952	-	NM_001002011	Lmna	startC	18	3	0.167	14	2	0.143	11	2	0.182	0.164
chr3	88588137	+	NM_025448	Ssr2	stopC	18	5	0.278	0	0	0	0	0	0	#
chr3	89142209	+	NM_013631	Pklr	CDS	18	5	0.278	0	0	0	0	0	0	#
chr3	89142246	+	NM_013631	Pklr	CDS	17	5	0.294	0	0	0	16	6	0.375	#
chr3	89393063	-	NM_009565	Zbtb7b	5UTR	17	3	0.176	18	2	0.111	16	2	0.125	0.137333
chr3	89393091	-	NM_009565	Zbtb7b	5UTR	20	3	0.15	20	2	0.1	15	3	0.2	0.15
chr3	89393095	-	NM_009565	Zbtb7b	5UTR	22	3	0.136	21	3	0.143	18	2	0.111	0.13
chr3	90038420	-	NM_028475	Ubap2l	CDS	21	6	0.286	0	0	0	0	0	0	#
chr3	90079815	+	NM_001253738	Tpm3	startC	25	3	0.12	24	3	0.125	24	3	0.125	0.123333
chr3	90079824	+	NM_001253738	Tpm3	startC	20	2	0.1	25	4	0.16	23	4	0.174	0.144667
chr3	90086521	+	NM_022314	Tpm3	CDS	69	12	0.174	0	0	0	72	12	0.167	#
chr3	90090018	+	NM_022314	Tpm3	CDS	32	7	0.219	0	0	0	0	0	0	#
chr3	90100804	+	NM_022314	Tpm3	3UTR	19	7	0.368	0	0	0	0	0	0	#
chr3	90669531	+	NM_013650	S100a8	startC	12	12	1	12	12	1	10	10	1	1
chr3	90669535	+	NM_013650	S100a8	startC	12	12	1	13	13	1	10	10	1	1
chr3	90669540	+	NM_013650	S100a8	startC	13	13	1	13	13	1	10	10	1	1
chr3	90669545	+	NM_013650	S100a8	startC	14	14	1	17	17	1	14	14	1	1
chr3	90669546	+	NM_013650	S100a8	startC	15	15	1	15	15	1	14	14	1	1
chr3	90669549	+	NM_013650	S100a8	startC	13	12	0.923	16	16	1	14	14	1	0.974333
chr3	90669554	+	NM_013650	S100a8	startC	12	12	1	13	13	1	14	14	1	1
chr3	90669564	+	NM_013650	S100a8	startC	10	10	1	14	14	1	14	14	1	1
chr3	90669565	+	NM_013650	S100a8	startC	11	11	1	13	13	1	14	14	1	1
chr3	90695292	-	NM_009114	S100a9	startC	13	12	0.923	13	11	0.846	11	9	0.818	0.862333
chr3	90695671	-	NM_009114	S100a9	5UTR	20	20	1	24	24	1	24	24	1	1
chr3	90695672	-	NM_009114	S100a9	5UTR	20	20	1	24	24	1	22	22	1	1
chr3	90695678	-	NM_009114	S100a9	5UTR	20	20	1	23	23	1	22	22	1	1
chr3	90695680	-	NM_009114	S100a9	5UTR	20	20	1	24	24	1	24	24	1	1
chr3	90695686	-	NM_009114	S100a9	5UTR	21	21	1	24	24	1	22	22	1	1
chr3	90695689	-	NM_009114	S100a9	5UTR	18	18	1	23	23	1	19	19	1	1
chr3	93555208	+	NM_009112	S100a10	5UTR	26	3	0.115	0	0	0	0	0	0	#
chr3	94614132	-	NM_011656	Tuft1	stopC	15	4	0.267	0	0	0	0	0	0	#
chr3	95033965	-	NM_008951	Psmd4	CDS	13	6	0.462	0	0	0	0	0	0	#
chr3	95315275	+	NM_029789	Cers2	5UTR	12	2	0.167	0	0	0	0	0	0	#
chr3	95315311	+	NM_029789	Cers2	5UTR	15	2	0.133	11	2	0.182	13	2	0.154	0.156333
chr3	95315320	+	NM_029789	Cers2	5UTR	13	2	0.154	11	3	0.273	14	2	0.143	0.19
chr3	95315342	+	NM_029789	Cers2	5UTR	15	4	0.267	11	3	0.273	12	4	0.333	0.291
chr3	95661133	+	NM_008562	Mcl1	3UTR	24	6	0.25	0	0	0	0	0	0	#
chr3	96269810	+	NM_175666	Hist2h2bb	startC	29	5	0.172	28	4	0.143	28	6	0.214	0.176333
chr3	96270081	+	NM_175666	Hist2h2bb	stopC	17	4	0.235	0	0	0	0	0	0	#
chr3	96270146	+	NM_175666	Hist2h2bb	stopC	13	5	0.385	18	9	0.5	14	5	0.357	0.414
chr3	96270156	+	NM_175666	Hist2h2bb	stopC	15	9	0.6	17	10	0.588	16	6	0.375	0.521
chr3	96270159	+	NM_175666	Hist2h2bb	stopC	16	7	0.438	16	10	0.625	16	8	0.5	0.521
chr3	96270164	+	NM_175666	Hist2h2bb	stopC	14	6	0.429	14	7	0.5	15	6	0.4	0.443
chr3	96270165	+	NM_175666	Hist2h2bb	stopC	12	6	0.5	16	9	0.562	15	6	0.4	0.487333
chr3	96270166	+	NM_175666	Hist2h2bb	stopC	12	7	0.583	14	10	0.714	14	6	0.429	0.575333
chr3	96270173	+	NM_175666	Hist2h2bb	stopC	11	6	0.545	14	9	0.643	12	6	0.5	0.562667
chr3	96270175	+	NM_175666	Hist2h2bb	stopC	12	6	0.5	13	9	0.692	11	7	0.636	0.609333
chr3	96561365	+	NM_023719	Txnip	3UTR	12	3	0.25	0	0	0	0	0	0	#
chr3	96850376	+	NM_021517	Pdzk1	startC	17	2	0.118	0	0	0	0	0	0	#
chr3	96850382	+	NM_021517	Pdzk1	startC	15	4	0.267	12	3	0.25	12	3	0.25	0.255667
chr3	96870222	+	NM_021517	Pdzk1	stopC	14	4	0.286	0	0	0	0	0	0	#
chr3	97901314	+	NM_011342	Sec22b	startC	15	5	0.333	16	3	0.188	18	3	0.167	0.229333
chr3	97901377	+	NM_011342	Sec22b	startC	22	3	0.136	28	3	0.107	25	4	0.16	0.134333
chr3	97901385	+	NM_011342	Sec22b	startC	20	3	0.15	29	4	0.138	25	6	0.24	0.176
chr3	97901391	+	NM_011342	Sec22b	startC	18	2	0.111	26	3	0.115	20	4	0.2	0.142
chr3	101576458	-	NM_144900	Atp1a1	stopC	65	8	0.123	0	0	0	44	7	0.159	#
chr3	101576541	-	NM_144900	Atp1a1	stopC	64	10	0.156	54	10	0.185	62	8	0.129	0.156667
chr3	101576547	-	NM_144900	Atp1a1	stopC	68	11	0.162	60	8	0.133	64	7	0.111	0.135333
chr3	101582804	-	NM_144900	Atp1a1	CDS	73	12	0.164	75	10	0.133	0	0	0	#
chr3	101582826	-	NM_144900	Atp1a1	CDS	69	10	0.145	72	10	0.139	65	9	0.138	0.140667
chr3	101586130	-	NM_144900	Atp1a1	CDS	73	13	0.178	62	13	0.21	62	11	0.177	0.188333
chr3	101586245	-	NM_144900	Atp1a1	CDS	178	21	0.118	165	17	0.103	148	16	0.108	0.109667
chr3	101586886	-	NM_144900	Atp1a1	CDS	81	15	0.185	78	16	0.205	74	18	0.247	0.212333
chr3	101591408	-	NM_144900	Atp1a1	CDS	69	11	0.159	73	14	0.192	69	10	0.145	0.165333
chr3	101604418	-	NM_144900	Atp1a1	startC	52	7	0.135	0	0	0	0	0	0	#
chr3	101604430	-	NM_144900	Atp1a1	startC	51	6	0.12	32	5	0.156	33	9	0.273	0.183
chr3	101604455	-	NM_144900	Atp1a1	startC	24	5	0.208	15	2	0.133	13	2	0.154	0.165
chr3	101604468	-	NM_144900	Atp1a1	startC	21	4	0.19	11	2	0.182	12	2	0.167	0.179667
chr3	101604540	-	NM_144900	Atp1a1	startC	16	4	0.25	11	2	0.182	14	4	0.286	0.239333
chr3	101604559	-	NM_144900	Atp1a1	startC	16	2	0.125	13	3	0.231	16	5	0.312	0.222667
chr3	101604568	-	NM_144900	Atp1a1	startC	13	4	0.308	10	1	0.1	13	3	0.231	0.213
chr3	104638787	+	NM_009196	Slc16a1	5UTR	24	3	0.125	27	6	0.222	24	3	0.125	0.157333
chr3	104817997	-	NM_008619	Mov10	startC	17	3	0.176	0	0	0	0	0	0	#
chr3	107696348	-	NM_145542	Ahcyl1	startC	10	2	0.2	15	2	0.133	12	2	0.167	0.166667
chr3	107696353	-	NM_145542	Ahcyl1	startC	11	3	0.273	14	3	0.214	12	2	0.167	0.218
chr3	107696422	-	NM_145542	Ahcyl1	startC	22	3	0.136	13	2	0.154	11	2	0.182	0.157333
chr3	107696438	-	NM_145542	Ahcyl1	startC	18	3	0.167	11	2	0.182	14	5	0.357	0.235333
chr3	121768649	-	NM_008991	Abcd3	CDS	32	7	0.219	0	0	0	0	0	0	#
chr3	122895424	+	NM_007980	Fabp2	startC	317	44	0.139	318	36	0.113	307	38	0.124	0.125333
chr3	122896767	+	NM_007980	Fabp2	CDS	186	22	0.118	177	20	0.113	154	19	0.123	0.118
chr3	122896864	+	NM_007980	Fabp2	CDS	97	14	0.146	79	13	0.165	70	15	0.217	0.176
chr3	122898705	+	NM_007980	Fabp2	CDS	101	10	0.1	96	11	0.115	75	9	0.12	0.111667
chr3	122899256	+	NM_007980	Fabp2	stopC	22	5	0.227	23	6	0.261	0	0	0	#
chr3	122899298	+	NM_007980	Fabp2	stopC	30	6	0.2	35	7	0.2	0	0	0	#
chr3	129332471	-	NM_007934	Enpep	startC	13	3	0.231	12	2	0.167	13	2	0.154	0.184
chr3	131233748	-	NM_008212	Hadh	3UTR	24	4	0.167	22	6	0.273	0	0	0	#
chr3	131233765	-	NM_008212	Hadh	3UTR	23	7	0.304	0	0	0	0	0	0	#
chr3	131249807	-	NM_008212	Hadh	CDS	65	10	0.154	66	9	0.136	0	0	0	#
chr3	131271891	-	NM_008212	Hadh	startC	19	5	0.263	27	3	0.111	20	3	0.15	0.174667
chr3	131271899	-	NM_008212	Hadh	startC	22	5	0.227	22	7	0.318	19	2	0.105	0.216667
chr3	131271942	-	NM_008212	Hadh	startC	17	2	0.118	17	3	0.176	23	3	0.13	0.141333
chr3	131271943	-	NM_008212	Hadh	startC	17	2	0.118	18	3	0.167	24	4	0.167	0.150667
chr3	135438815	+	NM_025356	Ube2d3	5UTR	17	2	0.118	13	2	0.154	17	2	0.118	0.13
chr3	135439663	+	NM_025356	Ube2d3	startC	57	6	0.105	55	8	0.145	57	6	0.105	0.118333
chr3	135439698	+	NM_025356	Ube2d3	startC	14	2	0.143	0	0	0	0	0	0	#
chr3	135439721	+	NM_025356	Ube2d3	startC	18	4	0.222	15	3	0.2	18	2	0.111	0.177667
chr3	135439726	+	NM_025356	Ube2d3	startC	15	4	0.267	12	3	0.25	15	4	0.267	0.261333
chr3	136670277	+	NM_008913	Ppp3ca	5UTR	39	7	0.179	38	7	0.184	36	6	0.167	0.176667
chr3	136670278	+	NM_008913	Ppp3ca	5UTR	37	5	0.135	0	0	0	0	0	0	#
chr3	136670795	+	NM_008913	Ppp3ca	startC	13	3	0.231	16	5	0.312	16	4	0.25	0.264333
chr3	138089914	-	NM_008642	Mttp	3UTR	40	7	0.179	0	0	0	0	0	0	#
chr3	138090630	-	NM_008642	Mttp	3UTR	39	6	0.154	35	6	0.171	30	7	0.233	0.186
chr3	138090663	-	NM_008642	Mttp	3UTR	14	5	0.357	0	0	0	0	0	0	#
chr3	138091138	-	NM_008642	Mttp	stopC	59	8	0.136	57	7	0.123	0	0	0	#
chr3	138112508	-	NM_008642	Mttp	CDS	20	7	0.35	0	0	0	17	5	0.294	#
chr3	138115137	-	NM_008642	Mttp	CDS	66	14	0.212	64	11	0.172	55	9	0.164	0.182667
chr3	144913416	-	NM_001033199	Clca4b	CDS	29	7	0.241	25	7	0.28	0	0	0	#
chr3	144932418	-	NM_001033199	Clca4b	startC	14	2	0.143	11	2	0.182	12	2	0.167	0.164
chr3	152094136	-	NM_016867	Gipc2	stopC	28	5	0.179	31	7	0.226	26	7	0.269	0.224667
chr3	152165883	-	NM_016867	Gipc2	startC	24	5	0.208	17	2	0.118	17	2	0.118	0.148
chr3	153912127	-	NM_011231	Rabggtb	startC	15	7	0.467	10	7	0.7	10	8	0.8	0.655667
chr3	153912128	-	NM_011231	Rabggtb	startC	16	10	0.625	11	8	0.727	12	11	0.917	0.756333
chr3	153912134	-	NM_011231	Rabggtb	startC	24	15	0.652	15	13	0.867	18	18	1	0.839667
chr3	153912136	-	NM_011231	Rabggtb	startC	23	15	0.652	16	13	0.812	18	17	0.944	0.802667
chr3	153912145	-	NM_011231	Rabggtb	startC	24	15	0.625	16	12	0.75	22	19	0.864	0.746333
chr3	153912147	-	NM_011231	Rabggtb	startC	25	14	0.56	18	14	0.778	22	18	0.818	0.718667
chr3	153912153	-	NM_011231	Rabggtb	startC	29	16	0.552	22	16	0.727	23	18	0.783	0.687333
chr3	153912155	-	NM_011231	Rabggtb	startC	28	14	0.5	18	11	0.611	22	16	0.727	0.612667
chr3	153912156	-	NM_011231	Rabggtb	startC	28	16	0.571	19	14	0.737	19	16	0.842	0.716667
chr3	153912173	-	NM_011231	Rabggtb	startC	38	22	0.579	30	22	0.733	33	23	0.697	0.669667
chr3	153912179	-	NM_011231	Rabggtb	startC	50	35	0.7	40	32	0.8	45	36	0.8	0.766667
chr3	153912187	-	NM_011231	Rabggtb	startC	57	40	0.702	45	38	0.844	47	39	0.83	0.792
chr3	153912191	-	NM_011231	Rabggtb	startC	55	35	0.636	44	33	0.75	46	35	0.761	0.715667
chr3	153912201	-	NM_011231	Rabggtb	startC	53	40	0.755	45	38	0.844	44	38	0.864	0.821
chr3	31118578	+	NM_011386	Skil	stopC	0	0	0	25	5	0.2	24	7	0.292	#
chr3	63368572	+	NM_008604	Mme	CDS	0	0	0	17	5	0.294	0	0	0	#
chr3	88155800	+	NM_133665	Mef2d	startC	0	0	0	12	2	0.167	0	0	0	#
chr3	88483351	-	NM_019390	Lmna	stopC	0	0	0	24	5	0.208	0	0	0	#
chr3	89142255	+	NM_013631	Pklr	CDS	0	0	0	12	5	0.417	0	0	0	#
chr3	90100809	+	NM_022314	Tpm3	3UTR	0	0	0	17	4	0.235	0	0	0	#
chr3	93564410	+	NM_009112	S100a10	stopC	0	0	0	20	5	0.25	0	0	0	#
chr3	96558351	+	NM_023719	Txnip	startC	0	0	0	38	5	0.132	0	0	0	#
chr3	96869201	+	NM_021517	Pdzk1	CDS	0	0	0	14	5	0.357	0	0	0	#
chr3	101576459	-	NM_144900	Atp1a1	stopC	0	0	0	60	7	0.117	44	7	0.159	#
chr3	101579650	-	NM_144900	Atp1a1	CDS	0	0	0	52	10	0.192	0	0	0	#
chr3	101586930	-	NM_144900	Atp1a1	CDS	0	0	0	26	6	0.231	0	0	0	#
chr3	101590657	-	NM_144900	Atp1a1	CDS	0	0	0	28	7	0.25	0	0	0	#
chr3	101592447	-	NM_144900	Atp1a1	CDS	0	0	0	28	6	0.214	0	0	0	#
chr3	101592547	-	NM_144900	Atp1a1	CDS	0	0	0	74	11	0.149	0	0	0	#
chr3	101595086	-	NM_144900	Atp1a1	CDS	0	0	0	72	12	0.167	64	9	0.141	#
chr3	104638804	+	NM_009196	Slc16a1	5UTR	0	0	0	18	4	0.222	0	0	0	#
chr3	108904524	-	NM_025845	Prpf38b	CDS	0	0	0	10	4	0.4	0	0	0	#
chr3	108904578	-	NM_025845	Prpf38b	CDS	0	0	0	11	5	0.455	16	6	0.375	#
chr3	122899307	+	NM_007980	Fabp2	stopC	0	0	0	28	5	0.179	0	0	0	#
chr3	129270342	-	NM_007934	Enpep	stopC	0	0	0	22	5	0.227	0	0	0	#
chr3	129332183	-	NM_007934	Enpep	CDS	0	0	0	18	5	0.278	0	0	0	#
chr3	129332349	-	NM_007934	Enpep	startC	0	0	0	17	2	0.118	0	0	0	#
chr3	135439654	+	NM_025356	Ube2d3	startC	0	0	0	55	6	0.109	0	0	0	#
chr3	138091073	-	NM_008642	Mttp	stopC	0	0	0	15	4	0.267	0	0	0	#
chr3	138092672	-	NM_008642	Mttp	CDS	0	0	0	14	5	0.357	14	5	0.357	#
chr3	138109142	-	NM_008642	Mttp	CDS	0	0	0	85	11	0.129	87	12	0.138	#
chr3	138277679	+	NM_007409	Adh1	startC	0	0	0	10	1	0.1	0	0	0	#
chr3	144921952	-	NM_001033199	Clca4b	CDS	0	0	0	38	8	0.211	0	0	0	#
chr3	145016764	-	NM_017474	Clca1	CDS	0	0	0	28	6	0.214	0	0	0	#
chr3	145018678	-	NM_017474	Clca1	CDS	0	0	0	15	6	0.4	0	0	0	#
chr3	150072650	-	ENSMUST00000057740	Rpsa-ps10	stopC	0	0	0	14	4	0.286	0	0	0	#
chr3	158012345	-	NM_001093752	Srsf11	CDS	0	0	0	28	7	0.25	23	6	0.261	#
chr3	3658881	+	NM_013920	Hnf4g	3UTR	0	0	0	0	0	0	20	4	0.2	#
chr3	16183366	+	NM_172677	Ythdf3	startC	0	0	0	0	0	0	10	3	0.3	#
chr3	31118542	+	NM_011386	Skil	stopC	0	0	0	0	0	0	12	4	0.333	#
chr3	32751054	+	NM_025316	Ndufb5	stopC	0	0	0	0	0	0	23	5	0.217	#
chr3	34081227	-	NM_026332	Dnajc19	startC	0	0	0	0	0	0	10	2	0.2	#
chr3	63348696	+	NM_008604	Mme	CDS	0	0	0	0	0	0	13	5	0.385	#
chr3	72966760	-	NM_001081137	Sis	startC	0	0	0	0	0	0	11	2	0.182	#
chr3	87914558	+	NM_008231	Hdgf	CDS	0	0	0	0	0	0	10	4	0.4	#
chr3	88155801	+	NM_133665	Mef2d	startC	0	0	0	0	0	0	10	2	0.2	#
chr3	90086520	+	NM_022314	Tpm3	CDS	0	0	0	0	0	0	73	10	0.137	#
chr3	90212746	-	NM_027015	Rps27	stopC	0	0	0	0	0	0	26	6	0.231	#
chr3	90212943	-	NM_027015	Rps27	CDS	0	0	0	0	0	0	27	7	0.259	#
chr3	95315328	+	NM_029789	Cers2	5UTR	0	0	0	0	0	0	12	4	0.333	#
chr3	96850334	+	NM_021517	Pdzk1	startC	0	0	0	0	0	0	13	2	0.154	#
chr3	96870226	+	NM_021517	Pdzk1	stopC	0	0	0	0	0	0	12	4	0.333	#
chr3	101604578	-	NM_144900	Atp1a1	startC	0	0	0	0	0	0	10	1	0.1	#
chr3	104655635	+	NM_009196	Slc16a1	stopC	0	0	0	0	0	0	18	5	0.278	#
chr3	107696436	-	NM_145542	Ahcyl1	startC	0	0	0	0	0	0	10	4	0.4	#
chr3	107881176	+	NM_133867	Eps8l3	CDS	0	0	0	0	0	0	27	6	0.222	#
chr3	108146036	-	NM_010306	Gnai3	startC	0	0	0	0	0	0	10	1	0.1	#
chr3	129270186	-	NM_007934	Enpep	stopC	0	0	0	0	0	0	12	5	0.417	#
chr3	129332058	-	NM_007934	Enpep	CDS	0	0	0	0	0	0	10	6	0.6	#
chr3	129332291	-	NM_007934	Enpep	startC	0	0	0	0	0	0	19	4	0.211	#
chr3	129332399	-	NM_007934	Enpep	startC	0	0	0	0	0	0	11	1	0.111	#
chr3	131271903	-	NM_008212	Hadh	startC	0	0	0	0	0	0	20	2	0.1	#
chr3	131631657	+	NM_011863	Papss1	CDS	0	0	0	0	0	0	19	7	0.368	#
chr3	135438860	+	NM_025356	Ube2d3	5UTR	0	0	0	0	0	0	38	5	0.132	#
chr3	135439648	+	NM_025356	Ube2d3	startC	0	0	0	0	0	0	57	6	0.105	#
chr3	135439686	+	NM_025356	Ube2d3	startC	0	0	0	0	0	0	19	4	0.211	#
chr3	138109017	-	NM_008642	Mttp	CDS	0	0	0	0	0	0	20	6	0.3	#
chr3	138114202	-	NM_008642	Mttp	CDS	0	0	0	0	0	0	23	6	0.261	#
chr3	144961975	-	NM_207208	Clca4a	CDS	0	0	0	0	0	0	11	5	0.455	#
chr3	145004830	-	NM_017474	Clca1	stopC	0	0	0	0	0	0	39	6	0.154	#
chr3	152094117	-	NM_016867	Gipc2	stopC	0	0	0	0	0	0	26	6	0.231	#
chr3	152165881	-	NM_016867	Gipc2	startC	0	0	0	0	0	0	17	3	0.176	#
chr4	3973552	-	ENSMUST00000089430	Gm11808	startC	18	6	0.333	12	3	0.25	15	4	0.267	0.283333
chr4	3973564	-	ENSMUST00000089430	Gm11808	startC	18	3	0.167	13	2	0.154	15	3	0.2	0.173667
chr4	11783482	+	NM_019753	Cdh17	CDS	26	7	0.269	0	0	0	0	0	0	#
chr4	11817047	+	NM_019753	Cdh17	stopC	25	6	0.24	19	5	0.263	0	0	0	#
chr4	11817049	+	NM_019753	Cdh17	stopC	26	7	0.269	0	0	0	0	0	0	#
chr4	33248279	-	NM_001033225	Pnrc1	startC	41	5	0.122	43	8	0.186	37	4	0.108	0.138667
chr4	33248306	-	NM_001033225	Pnrc1	startC	15	4	0.267	11	3	0.273	13	3	0.231	0.257
chr4	40279213	-	NM_001033305	Ndufb6	startC	24	5	0.208	20	2	0.1	14	2	0.143	0.150333
chr4	40279228	-	NM_001033305	Ndufb6	startC	29	7	0.241	19	3	0.158	14	4	0.286	0.228333
chr4	40279231	-	NM_001033305	Ndufb6	startC	29	3	0.103	19	3	0.167	12	2	0.167	0.145667
chr4	40948003	-	NM_009736	Bag1	startC	10	2	0.2	12	2	0.167	11	2	0.182	0.183
chr4	43519264	-	NM_009416	Tpm2	CDS	16	5	0.312	0	0	0	0	0	0	#
chr4	43523313	-	NM_009416	Tpm2	startC	19	4	0.211	24	3	0.125	17	3	0.176	0.170667
chr4	43523330	-	NM_009416	Tpm2	startC	17	4	0.235	18	2	0.111	16	3	0.188	0.178
chr4	44012893	+	NM_016760	Clta	startC	12	3	0.25	15	2	0.133	10	1	0.1	0.161
chr4	44012929	+	NM_016760	Clta	startC	18	2	0.111	0	0	0	0	0	0	#
chr4	44012981	+	NM_016760	Clta	startC	18	4	0.222	19	3	0.158	19	3	0.158	0.179333
chr4	44025502	+	NM_016760	Clta	CDS	61	12	0.197	0	0	0	44	9	0.205	#
chr4	45804445	+	NM_028270	Aldh1b1	3UTR	19	4	0.211	27	5	0.185	0	0	0	#
chr4	45804446	+	NM_028270	Aldh1b1	3UTR	18	4	0.222	26	8	0.308	19	4	0.211	0.247
chr4	46538815	-	NM_178893	Coro2a	3UTR	12	3	0.25	0	0	0	0	0	0	#
chr4	46601841	-	NM_001164804	Coro2a	5UTR	12	3	0.25	11	3	0.273	11	5	0.455	0.326
chr4	48279493	-	NM_029572	Erp44	startC	12	2	0.167	13	2	0.154	11	4	0.364	0.228333
chr4	48279494	-	NM_029572	Erp44	startC	15	2	0.133	15	2	0.133	14	2	0.143	0.136333
chr4	48279522	-	NM_029572	Erp44	startC	27	5	0.185	28	4	0.143	25	3	0.12	0.149333
chr4	49536524	-	NM_144903	Aldob	3UTR	114	12	0.105	0	0	0	0	0	0	#
chr4	49538312	-	NM_144903	Aldob	CDS	45	8	0.178	0	0	0	0	0	0	#
chr4	49539760	-	NM_144903	Aldob	CDS	39	7	0.179	0	0	0	0	0	0	#
chr4	49541222	-	NM_144903	Aldob	CDS	134	26	0.194	126	20	0.159	121	14	0.116	0.156333
chr4	49543826	-	NM_144903	Aldob	CDS	98	10	0.102	89	13	0.146	70	9	0.129	0.125667
chr4	49544859	-	NM_144903	Aldob	startC	51	10	0.196	47	10	0.213	37	8	0.216	0.208333
chr4	49544900	-	NM_144903	Aldob	startC	16	3	0.188	13	2	0.154	14	2	0.143	0.161667
chr4	49549448	-	NM_144903	Aldob	5UTR	13	2	0.154	0	0	0	0	0	0	#
chr4	53860675	+	NM_028053	Tmem38b	3UTR	16	16	1	25	25	1	18	17	0.944	0.981333
chr4	53860677	+	NM_028053	Tmem38b	3UTR	22	20	0.909	27	26	0.963	23	20	0.87	0.914
chr4	53860679	+	NM_028053	Tmem38b	3UTR	23	21	0.913	26	25	0.962	22	18	0.818	0.897667
chr4	53860680	+	NM_028053	Tmem38b	3UTR	23	21	0.913	28	26	0.929	23	18	0.783	0.875
chr4	53860681	+	NM_028053	Tmem38b	3UTR	22	19	0.864	28	27	0.964	28	23	0.821	0.883
chr4	53860685	+	NM_028053	Tmem38b	3UTR	25	22	0.88	33	31	0.939	29	24	0.828	0.882333
chr4	53860690	+	NM_028053	Tmem38b	3UTR	38	29	0.763	47	41	0.872	36	28	0.778	0.804333
chr4	53860695	+	NM_028053	Tmem38b	3UTR	49	32	0.653	51	39	0.765	46	31	0.674	0.697333
chr4	53860697	+	NM_028053	Tmem38b	3UTR	49	34	0.694	50	38	0.76	41	25	0.61	0.688
chr4	53860703	+	NM_028053	Tmem38b	3UTR	91	50	0.549	93	55	0.591	82	41	0.5	0.546667
chr4	53860708	+	NM_028053	Tmem38b	3UTR	118	70	0.593	122	73	0.598	111	61	0.55	0.580333
chr4	53860714	+	NM_028053	Tmem38b	3UTR	164	105	0.64	169	115	0.68	142	84	0.592	0.637333
chr4	53860718	+	NM_028053	Tmem38b	3UTR	162	106	0.654	169	118	0.698	142	87	0.613	0.655
chr4	53860719	+	NM_028053	Tmem38b	3UTR	163	109	0.669	171	120	0.702	142	88	0.62	0.663667
chr4	53860729	+	NM_028053	Tmem38b	3UTR	151	106	0.702	152	113	0.743	127	90	0.709	0.718
chr4	53860742	+	NM_028053	Tmem38b	3UTR	137	113	0.825	143	122	0.853	115	93	0.809	0.829
chr4	53860743	+	NM_028053	Tmem38b	3UTR	134	109	0.813	141	115	0.816	110	85	0.78	0.803
chr4	53860745	+	NM_028053	Tmem38b	3UTR	128	104	0.812	132	113	0.856	115	93	0.809	0.825667
chr4	53860746	+	NM_028053	Tmem38b	3UTR	133	109	0.82	139	115	0.827	114	93	0.816	0.821
chr4	53860755	+	NM_028053	Tmem38b	3UTR	128	104	0.819	137	117	0.854	114	92	0.807	0.826667
chr4	53860756	+	NM_028053	Tmem38b	3UTR	128	109	0.852	131	112	0.855	115	93	0.809	0.838667
chr4	53860762	+	NM_028053	Tmem38b	3UTR	117	100	0.855	125	108	0.864	107	94	0.879	0.866
chr4	53860769	+	NM_028053	Tmem38b	3UTR	104	92	0.885	106	96	0.906	89	78	0.876	0.889
chr4	55350330	+	NM_009011	Rad23b	startC	16	3	0.188	13	2	0.154	10	1	0.1	0.147333
chr4	55530311	-	NM_010637	Klf4	CDS	18	5	0.278	0	0	0	0	0	0	#
chr4	55530652	-	NM_010637	Klf4	CDS	14	5	0.357	0	0	0	0	0	0	#
chr4	55532195	-	NM_010637	Klf4	5UTR	17	2	0.118	16	2	0.125	14	3	0.214	0.152333
chr4	55532212	-	NM_010637	Klf4	5UTR	19	2	0.105	17	2	0.118	18	2	0.111	0.111333
chr4	55532217	-	NM_010637	Klf4	5UTR	23	4	0.174	17	2	0.118	19	2	0.105	0.132333
chr4	55532224	-	NM_010637	Klf4	5UTR	21	4	0.19	17	3	0.176	17	2	0.118	0.161333
chr4	55532265	-	NM_010637	Klf4	5UTR	18	2	0.111	11	2	0.182	13	3	0.231	0.174667
chr4	55532307	-	NM_010637	Klf4	5UTR	22	5	0.227	11	1	0.1	16	2	0.125	0.150667
chr4	55532333	-	NM_010637	Klf4	5UTR	38	4	0.105	26	3	0.115	20	3	0.15	0.123333
chr4	55532357	-	NM_010637	Klf4	5UTR	15	2	0.133	0	0	0	0	0	0	#
chr4	57143001	-	NM_019427	Epb4.1l4b	startC	29	4	0.138	20	4	0.2	17	4	0.235	0.191
chr4	57143029	-	NM_019427	Epb4.1l4b	startC	25	3	0.12	19	2	0.105	18	3	0.167	0.130667
chr4	57950842	-	NM_011660	Txn1	CDS	35	7	0.2	0	0	0	0	0	0	#
chr4	57951825	-	NM_011660	Txn1	CDS	49	8	0.163	52	9	0.173	0	0	0	#
chr4	57951845	-	NM_011660	Txn1	CDS	76	14	0.184	0	0	0	57	12	0.211	#
chr4	57956196	-	NM_011660	Txn1	startC	36	4	0.111	39	4	0.103	36	5	0.139	0.117667
chr4	57956260	-	NM_011660	Txn1	startC	66	11	0.167	61	9	0.148	52	8	0.154	0.156333
chr4	57956273	-	NM_011660	Txn1	startC	38	7	0.184	32	4	0.129	38	4	0.105	0.139333
chr4	57956276	-	NM_011660	Txn1	startC	25	5	0.2	25	6	0.24	29	5	0.172	0.204
chr4	57956283	-	NM_011660	Txn1	startC	20	4	0.2	18	3	0.167	20	4	0.2	0.189
chr4	57956284	-	NM_011660	Txn1	startC	19	4	0.211	18	3	0.167	19	3	0.158	0.178667
chr4	57956286	-	NM_011660	Txn1	startC	10	2	0.2	11	2	0.182	14	5	0.357	0.246333
chr4	59189277	+	ENSMUST00000030074	Ugcg	5UTR	15	2	0.133	13	2	0.154	13	2	0.154	0.147
chr4	59189357	+	ENSMUST00000030074	Ugcg	5UTR	23	5	0.217	17	2	0.118	20	2	0.1	0.145
chr4	59189370	+	ENSMUST00000030074	Ugcg	5UTR	20	2	0.1	15	2	0.133	15	4	0.267	0.166667
chr4	59189555	+	NM_011673	Ugcg	startC	13	3	0.231	12	2	0.167	0	0	0	#
chr4	80910724	+	NM_026821	Lurap1l	5UTR	20	2	0.1	17	3	0.176	20	2	0.1	0.125333
chr4	82505011	-	NM_008687	Nfib	5UTR	14	4	0.286	16	3	0.188	15	3	0.2	0.224667
chr4	95051101	-	NM_010591	Jun	startC	15	2	0.133	17	2	0.118	19	2	0.105	0.118667
chr4	95051273	-	NM_010591	Jun	startC	15	4	0.267	0	0	0	0	0	0	#
chr4	95051928	-	NM_010591	Jun	5UTR	12	2	0.182	11	3	0.273	17	4	0.235	0.23
chr4	95051929	-	NM_010591	Jun	5UTR	11	5	0.455	10	1	0.1	17	3	0.176	0.243667
chr4	95051932	-	NM_010591	Jun	5UTR	12	2	0.167	0	0	0	0	0	0	#
chr4	95052163	-	NM_010591	Jun	5UTR	14	3	0.214	16	2	0.125	15	2	0.133	0.157333
chr4	98677284	+	NM_007704	Inadl	CDS	18	6	0.333	0	0	0	0	0	0	#
chr4	109013787	+	NM_146150	Nrd1	CDS	23	6	0.261	0	0	0	0	0	0	#
chr4	116069968	-	NM_025641	Uqcrh	CDS	49	8	0.163	0	0	0	0	0	0	#
chr4	116637800	-	NM_021473	Akr1a1	CDS	18	5	0.278	20	7	0.35	21	6	0.286	0.304667
chr4	116645512	-	NM_021473	Akr1a1	startC	28	3	0.107	19	7	0.368	18	2	0.111	0.195333
chr4	116645577	-	NM_021473	Akr1a1	startC	22	3	0.136	0	0	0	0	0	0	#
chr4	118277390	-	NM_011213	Ptprf	startC	13	2	0.154	14	4	0.286	11	3	0.273	0.237667
chr4	118277393	-	NM_011213	Ptprf	startC	12	3	0.25	0	0	0	0	0	0	#
chr4	118277445	-	NM_011213	Ptprf	startC	18	2	0.111	14	3	0.214	10	1	0.1	0.141667
chr4	118277459	-	NM_011213	Ptprf	startC	17	2	0.118	12	2	0.167	10	1	0.1	0.128333
chr4	118284813	-	NM_011213	Ptprf	5UTR	22	6	0.273	13	5	0.385	14	4	0.286	0.314667
chr4	118291190	-	NM_011213	Ptprf	5UTR	32	6	0.188	31	5	0.161	21	4	0.19	0.179667
chr4	118291208	-	NM_011213	Ptprf	5UTR	40	4	0.1	41	5	0.122	29	6	0.207	0.143
chr4	118291218	-	NM_011213	Ptprf	5UTR	40	6	0.15	40	7	0.175	25	3	0.12	0.148333
chr4	118291232	-	NM_011213	Ptprf	5UTR	31	4	0.129	30	4	0.133	21	3	0.143	0.135
chr4	119294389	-	NM_011732	Ybx1	startC	70	9	0.129	50	7	0.14	54	11	0.204	0.157667
chr4	119294431	-	NM_011732	Ybx1	startC	43	10	0.233	30	4	0.133	29	4	0.138	0.168
chr4	119294459	-	NM_011732	Ybx1	startC	28	3	0.107	16	2	0.125	20	4	0.2	0.144
chr4	119656642	-	NM_008191	Guca2b	stopC	44	6	0.136	0	0	0	28	6	0.214	#
chr4	119656807	-	NM_008191	Guca2b	stopC	37	9	0.243	0	0	0	31	8	0.258	#
chr4	119656847	-	NM_008191	Guca2b	stopC	65	7	0.108	0	0	0	0	0	0	#
chr4	119658787	-	NM_008191	Guca2b	startC	19	2	0.105	23	3	0.13	12	2	0.167	0.134
chr4	122859315	-	NM_007598	Cap1	3UTR	25	5	0.2	0	0	0	0	0	0	#
chr4	122872456	-	NM_007598	Cap1	startC	11	3	0.273	16	2	0.125	11	4	0.364	0.254
chr4	123750005	-	NM_023423	Akirin1	startC	14	2	0.143	0	0	0	0	0	0	#
chr4	128993352	+	NM_016895	Ak2	startC	34	4	0.118	0	0	0	0	0	0	#
chr4	128993366	+	NM_016895	Ak2	startC	35	5	0.143	26	4	0.154	29	3	0.103	0.133333
chr4	129008055	+	NM_016895	Ak2	CDS	28	6	0.214	0	0	0	0	0	0	#
chr4	129011083	+	NM_016895	Ak2	3UTR	19	6	0.316	25	6	0.24	0	0	0	#
chr4	129105649	+	NM_025452	Tmem54	startC	10	2	0.2	12	2	0.167	12	2	0.167	0.178
chr4	129110558	+	NM_025452	Tmem54	CDS	17	6	0.353	0	0	0	16	5	0.312	#
chr4	129223907	-	NM_001033189	C77080	CDS	12	5	0.417	19	6	0.333	0	0	0	#
chr4	129248263	-	NM_001033189	C77080	startC	12	2	0.167	10	1	0.1	10	2	0.2	0.155667
chr4	129248296	-	NM_001033189	C77080	startC	13	2	0.154	15	2	0.133	16	2	0.125	0.137333
chr4	129248329	-	NM_001033189	C77080	startC	39	5	0.128	34	4	0.118	31	4	0.129	0.125
chr4	129248338	-	NM_001033189	C77080	startC	34	6	0.176	33	5	0.152	28	5	0.179	0.169
chr4	129741909	-	NM_011317	Khdrbs1	CDS	34	7	0.206	0	0	0	0	0	0	#
chr4	129820429	+	ENSMUST00000030578	Ptp4a2	5UTR	33	5	0.152	28	4	0.143	26	5	0.192	0.162333
chr4	129820436	+	ENSMUST00000030578	Ptp4a2	5UTR	33	6	0.182	29	3	0.103	25	5	0.2	0.161667
chr4	129820441	+	ENSMUST00000030578	Ptp4a2	5UTR	32	6	0.188	29	4	0.138	25	4	0.16	0.162
chr4	129820442	+	ENSMUST00000030578	Ptp4a2	5UTR	32	4	0.125	29	3	0.103	24	3	0.125	0.117667
chr4	129820459	+	ENSMUST00000030578	Ptp4a2	5UTR	21	3	0.143	19	2	0.105	16	2	0.125	0.124333
chr4	129820465	+	ENSMUST00000030578	Ptp4a2	5UTR	12	2	0.167	16	3	0.188	13	4	0.308	0.221
chr4	129820507	+	NM_008974	Ptp4a2	5UTR	25	4	0.16	0	0	0	0	0	0	#
chr4	129820524	+	NM_008974	Ptp4a2	5UTR	28	5	0.179	19	4	0.211	21	3	0.143	0.177667
chr4	130663412	+	NM_030722	Pum1	5UTR	12	3	0.273	10	2	0.2	10	3	0.3	0.257667
chr4	132530723	-	NM_007512	Atpif1	stopC	54	8	0.148	43	6	0.14	42	7	0.167	0.151667
chr4	132530741	-	NM_007512	Atpif1	stopC	70	9	0.129	61	10	0.164	0	0	0	#
chr4	132533485	-	NM_007512	Atpif1	startC	19	4	0.211	25	3	0.12	13	3	0.231	0.187333
chr4	132533497	-	NM_007512	Atpif1	startC	19	3	0.158	25	4	0.16	12	3	0.25	0.189333
chr4	132533527	-	NM_007512	Atpif1	startC	21	4	0.19	27	5	0.185	16	3	0.188	0.187667
chr4	133600683	-	NM_018754	Sfn	3UTR	44	9	0.205	40	5	0.128	38	6	0.158	0.163667
chr4	133600689	-	NM_018754	Sfn	3UTR	39	6	0.154	41	5	0.122	0	0	0	#
chr4	134924044	+	NM_023665	Rsrp1	startC	24	4	0.167	27	3	0.111	22	3	0.136	0.138
chr4	134924057	+	NM_023665	Rsrp1	startC	22	3	0.136	0	0	0	0	0	0	#
chr4	134924069	+	NM_023665	Rsrp1	startC	19	2	0.105	0	0	0	0	0	0	#
chr4	134924074	+	NM_023665	Rsrp1	startC	19	3	0.158	24	3	0.125	15	3	0.2	0.161
chr4	134924105	+	NM_023665	Rsrp1	startC	10	1	0.1	0	0	0	0	0	0	#
chr4	134924469	+	NM_023665	Rsrp1	CDS	46	9	0.196	39	7	0.179	0	0	0	#
chr4	135751324	+	NM_178257	Il22ra1	stopC	13	5	0.385	0	0	0	0	0	0	#
chr4	136602439	-	NM_133872	Kdm1a	startC	12	2	0.167	17	2	0.118	13	2	0.154	0.146333
chr4	136602454	-	NM_133872	Kdm1a	startC	13	2	0.154	19	3	0.167	15	4	0.286	0.202333
chr4	136602460	-	NM_133872	Kdm1a	startC	13	4	0.308	19	6	0.316	17	4	0.235	0.286333
chr4	136602467	-	NM_133872	Kdm1a	startC	14	3	0.214	19	3	0.158	18	2	0.111	0.161
chr4	136602470	-	NM_133872	Kdm1a	startC	13	2	0.154	18	2	0.111	15	2	0.133	0.132667
chr4	138304908	+	NM_007838	Ddost	startC	16	2	0.133	0	0	0	0	0	0	#
chr4	138304918	+	NM_007838	Ddost	startC	17	6	0.375	14	3	0.214	19	3	0.158	0.249
chr4	138454864	+	ENSMUST00000050918	Camk2n1	5UTR	19	3	0.158	0	0	0	0	0	0	#
chr4	138455227	+	NM_025451	Camk2n1	startC	28	4	0.143	29	3	0.103	27	3	0.111	0.119
chr4	138455233	+	NM_025451	Camk2n1	startC	21	4	0.19	0	0	0	26	5	0.192	#
chr4	138455251	+	NM_025451	Camk2n1	startC	26	3	0.115	25	3	0.12	23	4	0.174	0.136333
chr4	138455267	+	NM_025451	Camk2n1	startC	27	4	0.148	26	3	0.115	25	3	0.12	0.127667
chr4	138967159	+	NM_025786	Rnf186	startC	21	2	0.1	22	3	0.143	19	3	0.158	0.133667
chr4	139238926	+	NM_009798	Capzb	CDS	22	6	0.273	0	0	0	25	7	0.28	#
chr4	141576245	-	NM_133754	Fblim1	3UTR	21	4	0.19	19	4	0.211	0	0	0	#
chr4	141859351	-	NM_025994	Efhd2	3UTR	10	3	0.3	0	0	0	0	0	0	#
chr4	141874687	-	NM_025994	Efhd2	startC	15	3	0.2	13	2	0.154	12	3	0.25	0.201333
chr4	141874690	-	NM_025994	Efhd2	startC	16	2	0.125	0	0	0	0	0	0	#
chr4	141874709	-	NM_025994	Efhd2	startC	21	3	0.143	19	3	0.158	18	4	0.222	0.174333
chr4	141874716	-	NM_025994	Efhd2	startC	23	4	0.174	0	0	0	21	3	0.15	#
chr4	141874781	-	NM_025994	Efhd2	startC	13	2	0.154	10	1	0.1	10	1	0.1	0.118
chr4	141874792	-	NM_025994	Efhd2	startC	13	3	0.231	10	1	0.1	10	1	0.1	0.143667
chr4	148617429	-	NM_145556	Tardbp	3UTR	11	4	0.364	0	0	0	0	0	0	#
chr4	148617435	-	NM_145556	Tardbp	3UTR	15	5	0.333	12	6	0.5	16	4	0.25	0.361
chr4	149150293	-	NM_001081274	Pgd	3UTR	10	4	0.4	12	4	0.333	10	3	0.3	0.344333
chr4	149150298	-	NM_001081274	Pgd	3UTR	12	4	0.333	10	4	0.444	10	3	0.3	0.359
chr4	149150311	-	NM_001081274	Pgd	3UTR	14	5	0.357	0	0	0	11	4	0.364	#
chr4	149150397	-	NM_001081274	Pgd	3UTR	30	9	0.3	27	8	0.296	13	5	0.385	0.327
chr4	149150398	-	NM_001081274	Pgd	3UTR	32	8	0.25	27	7	0.259	0	0	0	#
chr4	149150432	-	NM_001081274	Pgd	3UTR	30	6	0.2	0	0	0	0	0	0	#
chr4	149586632	+	NM_023051	Clstn1	startC	13	2	0.154	16	2	0.125	10	3	0.3	0.193
chr4	149586648	+	NM_023051	Clstn1	startC	13	2	0.154	19	2	0.105	12	2	0.167	0.142
chr4	149586656	+	NM_023051	Clstn1	startC	13	5	0.385	18	3	0.167	13	4	0.308	0.286667
chr4	150406381	+	NM_001085492	Rere	startC	10	3	0.3	12	2	0.167	10	1	0.1	0.189
chr4	150406387	+	NM_001085492	Rere	startC	10	2	0.2	12	3	0.25	10	2	0.2	0.216667
chr4	150406399	+	NM_001085492	Rere	startC	12	3	0.25	16	5	0.312	14	3	0.214	0.258667
chr4	150616079	+	NM_001085492	Rere	CDS	10	5	0.5	13	6	0.462	0	0	0	#
chr4	152120699	-	ENSMUST00000030785	Espn	3UTR	20	4	0.2	0	0	0	0	0	0	#
chr4	154278979	-	NM_001112744	Arhgef16	stopC	24	5	0.208	25	5	0.2	20	5	0.25	0.219333
chr4	154299934	-	ENSMUST00000030898	Arhgef16	5UTR	10	1	0.1	0	0	0	0	0	0	#
chr4	155086274	-	NM_026395	Rer1	5UTR	14	2	0.143	17	2	0.118	11	4	0.364	0.208333
chr4	155086277	-	NM_026395	Rer1	5UTR	16	4	0.267	17	3	0.176	12	4	0.333	0.258667
chr4	155086294	-	NM_026395	Rer1	5UTR	18	4	0.222	17	2	0.118	12	4	0.333	0.224333
chr4	155086301	-	ENSMUST00000030914	Rer1	5UTR	16	2	0.125	17	2	0.118	12	2	0.167	0.136667
chr4	155086313	-	ENSMUST00000030914	Rer1	5UTR	17	2	0.118	14	2	0.143	13	2	0.154	0.138333
chr4	155491474	+	NM_008142	Gnb1	5UTR	27	4	0.148	20	2	0.1	19	2	0.105	0.117667
chr4	155527467	+	NM_008142	Gnb1	startC	26	4	0.154	24	3	0.125	19	2	0.105	0.128
chr4	155847724	+	NM_010091	Dvl1	startC	13	2	0.154	0	0	0	0	0	0	#
chr4	133847420	-	NM_009097	Rps6ka1	3UTR	0	0	0	15	4	0.267	11	3	0.273	#
chr4	134508204	+	NM_027995	Paqr7	3UTR	0	0	0	10	4	0.4	0	0	0	#
chr4	136144897	+	NM_008321	Id3	3UTR	0	0	0	17	5	0.294	0	0	0	#
chr4	140966572	+	NM_023374	Sdhb	CDS	0	0	0	17	5	0.294	0	0	0	#
chr4	141576279	-	NM_133754	Fblim1	3UTR	0	0	0	20	4	0.2	0	0	0	#
chr4	145178215	-	NM_001276465	Vps13d	CDS	0	0	0	36	7	0.194	29	7	0.241	#
chr4	149150392	-	NM_001081274	Pgd	3UTR	0	0	0	22	4	0.182	0	0	0	#
chr4	149648564	+	NM_023051	Clstn1	3UTR	0	0	0	14	4	0.286	0	0	0	#
chr4	155647495	+	NM_007661	Cdk11b	CDS	0	0	0	20	7	0.35	18	10	0.556	#
chr4	10989551	-	NM_175175	Plekhf2	3UTR	0	0	0	11	3	0.273	0	0	0	#
chr4	11780125	+	NM_019753	Cdh17	CDS	0	0	0	36	8	0.222	27	6	0.222	#
chr4	33248423	-	NM_001033225	Pnrc1	startC	0	0	0	16	4	0.25	0	0	0	#
chr4	33248441	-	NM_001033225	Pnrc1	startC	0	0	0	16	3	0.188	0	0	0	#
chr4	40279212	-	NM_001033305	Ndufb6	startC	0	0	0	20	4	0.2	0	0	0	#
chr4	40931304	+	NM_011463	Spink4	stopC	0	0	0	14	7	0.5	0	0	0	#
chr4	41213790	-	ENSMUST00000135323	Ubap2	startC	0	0	0	20	3	0.15	11	3	0.273	#
chr4	45804372	+	NM_028270	Aldh1b1	3UTR	0	0	0	11	4	0.364	0	0	0	#
chr4	45804443	+	NM_028270	Aldh1b1	3UTR	0	0	0	26	5	0.192	0	0	0	#
chr4	46469941	+	NM_130889	Anp32b	CDS	0	0	0	26	6	0.231	0	0	0	#
chr4	49536836	-	NM_144903	Aldob	stopC	0	0	0	13	4	0.308	10	4	0.4	#
chr4	57084033	-	NM_019427	Epb4.1l4b	CDS	0	0	0	13	5	0.385	0	0	0	#
chr4	57142853	-	NM_019427	Epb4.1l4b	CDS	0	0	0	13	6	0.462	0	0	0	#
chr4	57951878	-	NM_011660	Txn1	CDS	0	0	0	42	7	0.171	0	0	0	#
chr4	59189353	+	ENSMUST00000030074	Ugcg	5UTR	0	0	0	18	3	0.167	0	0	0	#
chr4	59220381	+	NM_011673	Ugcg	stopC	0	0	0	36	6	0.167	31	7	0.226	#
chr4	108044682	-	NM_011327	Scp2	stopC	0	0	0	22	6	0.273	0	0	0	#
chr4	108063921	-	NM_011327	Scp2	CDS	0	0	0	19	6	0.316	21	6	0.286	#
chr4	115738677	+	NM_172698	Efcab14	startC	0	0	0	31	4	0.129	20	4	0.2	#
chr4	116637785	-	NM_021473	Akr1a1	CDS	0	0	0	19	6	0.316	0	0	0	#
chr4	116995646	+	NM_175244	Hectd3	CDS	0	0	0	17	5	0.294	0	0	0	#
chr4	122859313	-	NM_007598	Cap1	3UTR	0	0	0	23	5	0.217	0	0	0	#
chr4	122859344	-	NM_007598	Cap1	3UTR	0	0	0	27	6	0.222	0	0	0	#
chr4	129011116	+	NM_016895	Ak2	3UTR	0	0	0	11	3	0.273	18	4	0.222	#
chr4	129741941	-	NM_011317	Khdrbs1	CDS	0	0	0	16	5	0.312	0	0	0	#
chr4	11171626	+	NM_021897	Trp53inp1	3UTR	0	0	0	0	0	0	10	4	0.4	#
chr4	11804071	+	NM_019753	Cdh17	CDS	0	0	0	0	0	0	23	7	0.304	#
chr4	11817061	+	NM_019753	Cdh17	stopC	0	0	0	0	0	0	28	5	0.179	#
chr4	33248405	-	NM_001033225	Pnrc1	startC	0	0	0	0	0	0	17	2	0.118	#
chr4	33248443	-	NM_001033225	Pnrc1	startC	0	0	0	0	0	0	16	4	0.25	#
chr4	40279200	-	NM_001033305	Ndufb6	startC	0	0	0	0	0	0	12	3	0.25	#
chr4	40947880	-	NM_009736	Bag1	CDS	0	0	0	0	0	0	34	8	0.235	#
chr4	40948015	-	NM_009736	Bag1	startC	0	0	0	0	0	0	10	1	0.1	#
chr4	43523243	-	NM_009416	Tpm2	startC	0	0	0	0	0	0	19	3	0.158	#
chr4	44012959	+	NM_016760	Clta	startC	0	0	0	0	0	0	25	3	0.12	#
chr4	44012978	+	NM_016760	Clta	startC	0	0	0	0	0	0	18	3	0.167	#
chr4	45804062	+	NM_028270	Aldh1b1	stopC	0	0	0	0	0	0	23	7	0.304	#
chr4	49539742	-	NM_144903	Aldob	CDS	0	0	0	0	0	0	21	6	0.286	#
chr4	55532291	-	NM_010637	Klf4	5UTR	0	0	0	0	0	0	15	2	0.133	#
chr4	57956201	-	NM_011660	Txn1	startC	0	0	0	0	0	0	38	4	0.105	#
chr4	57956274	-	NM_011660	Txn1	startC	0	0	0	0	0	0	38	4	0.105	#
chr4	95051855	-	NM_010591	Jun	5UTR	0	0	0	0	0	0	12	3	0.25	#
chr4	95051930	-	NM_010591	Jun	5UTR	0	0	0	0	0	0	16	3	0.188	#
chr4	98416757	+	NM_172696	Inadl	CDS	0	0	0	0	0	0	10	4	0.4	#
chr4	116574594	+	NM_029868	Gpbp1l1	CDS	0	0	0	0	0	0	17	5	0.294	#
chr4	116645533	-	NM_021473	Akr1a1	startC	0	0	0	0	0	0	31	4	0.129	#
chr4	118226296	-	NM_011213	Ptprf	CDS	0	0	0	0	0	0	15	5	0.333	#
chr4	119279110	-	NM_011732	Ybx1	stopC	0	0	0	0	0	0	35	6	0.171	#
chr4	119282273	-	NM_011732	Ybx1	CDS	0	0	0	0	0	0	16	5	0.312	#
chr4	119294312	-	NM_011732	Ybx1	startC	0	0	0	0	0	0	28	4	0.143	#
chr4	119294385	-	NM_011732	Ybx1	startC	0	0	0	0	0	0	53	7	0.132	#
chr4	119639228	+	NM_008190	Guca2a	stopC	0	0	0	0	0	0	16	4	0.25	#
chr4	128993319	+	NM_016895	Ak2	startC	0	0	0	0	0	0	14	3	0.231	#
chr4	129105698	+	NM_025452	Tmem54	startC	0	0	0	0	0	0	12	2	0.167	#
chr4	132285101	+	NM_025579	Taf12	CDS	0	0	0	0	0	0	19	5	0.263	#
chr4	134924026	+	NM_023665	Rsrp1	startC	0	0	0	0	0	0	15	2	0.143	#
chr4	134934560	+	NM_026780	Syf2	CDS	0	0	0	0	0	0	13	5	0.385	#
chr4	136602453	-	NM_133872	Kdm1a	startC	0	0	0	0	0	0	18	4	0.222	#
chr4	136602458	-	NM_133872	Kdm1a	startC	0	0	0	0	0	0	17	3	0.176	#
chr4	138454899	+	ENSMUST00000050918	Camk2n1	5UTR	0	0	0	0	0	0	27	3	0.111	#
chr4	138455203	+	NM_025451	Camk2n1	startC	0	0	0	0	0	0	26	4	0.154	#
chr4	138455225	+	NM_025451	Camk2n1	startC	0	0	0	0	0	0	29	3	0.103	#
chr4	138455236	+	NM_025451	Camk2n1	startC	0	0	0	0	0	0	19	3	0.158	#
chr4	140961435	+	NM_023374	Sdhb	startC	0	0	0	0	0	0	18	2	0.111	#
chr4	141874733	-	NM_025994	Efhd2	startC	0	0	0	0	0	0	15	2	0.133	#
chr4	148617458	-	NM_145556	Tardbp	3UTR	0	0	0	0	0	0	15	5	0.333	#
chr4	149150303	-	NM_001081274	Pgd	3UTR	0	0	0	0	0	0	10	4	0.4	#
chr4	149150424	-	NM_001081274	Pgd	3UTR	0	0	0	0	0	0	21	4	0.19	#
chr4	149586645	+	NM_023051	Clstn1	startC	0	0	0	0	0	0	11	2	0.182	#
chr4	149647812	+	NM_023051	Clstn1	3UTR	0	0	0	0	0	0	17	5	0.312	#
chr4	150406382	+	NM_001085492	Rere	startC	0	0	0	0	0	0	10	1	0.1	#
chr4	155527501	+	NM_008142	Gnb1	startC	0	0	0	0	0	0	11	3	0.273	#
chr5	30267086	+	NM_027652	Ept1	stopC	12	4	0.333	12	4	0.333	10	4	0.4	0.355333
chr5	30921934	+	NM_008439	Khk	startC	20	2	0.1	19	4	0.211	22	4	0.182	0.164333
chr5	30921946	+	NM_008439	Khk	startC	15	2	0.133	17	2	0.118	18	2	0.111	0.120667
chr5	30921955	+	NM_008439	Khk	startC	15	3	0.2	14	2	0.143	16	2	0.125	0.156
chr5	30931171	+	NM_008439	Khk	stopC	18	4	0.222	0	0	0	0	0	0	#
chr5	30931181	+	NM_008439	Khk	stopC	18	4	0.222	0	0	0	0	0	0	#
chr5	30933402	-	NM_026770	Cgref1	stopC	22	6	0.273	22	8	0.364	16	4	0.25	0.295667
chr5	30933621	-	NM_026770	Cgref1	stopC	32	7	0.219	36	9	0.25	26	5	0.192	0.220333
chr5	30934402	-	NM_026770	Cgref1	CDS	34	8	0.235	0	0	0	0	0	0	#
chr5	30945369	-	NM_026770	Cgref1	startC	15	3	0.2	0	0	0	0	0	0	#
chr5	30955101	-	NM_016703	Preb	3UTR	18	4	0.222	19	6	0.316	18	5	0.278	0.272
chr5	30955116	-	NM_016703	Preb	3UTR	17	5	0.294	0	0	0	0	0	0	#
chr5	31174426	-	NM_027901	Gtf3c2	startC	17	2	0.118	16	2	0.125	12	2	0.167	0.136667
chr5	31174428	-	NM_027901	Gtf3c2	startC	18	2	0.111	16	2	0.125	12	2	0.167	0.134333
chr5	31243968	+	NM_147201	Nrbp1	startC	15	4	0.267	14	2	0.143	11	2	0.182	0.197333
chr5	32459301	+	NM_172707	Ppp1cb	startC	31	4	0.129	25	4	0.16	29	4	0.138	0.142333
chr5	33019095	+	NM_011738	Ywhah	startC	16	2	0.125	10	2	0.2	11	2	0.182	0.169
chr5	33104288	+	NM_019810	Slc5a1	startC	25	3	0.12	18	2	0.111	20	4	0.2	0.143667
chr5	33104291	+	NM_019810	Slc5a1	startC	25	3	0.12	0	0	0	0	0	0	#
chr5	33104296	+	NM_019810	Slc5a1	startC	26	4	0.154	0	0	0	0	0	0	#
chr5	33104365	+	NM_019810	Slc5a1	startC	21	5	0.238	15	4	0.267	22	4	0.182	0.229
chr5	33104368	+	NM_019810	Slc5a1	startC	18	2	0.111	15	2	0.133	20	4	0.2	0.148
chr5	33104414	+	NM_019810	Slc5a1	startC	36	5	0.139	35	5	0.143	26	3	0.115	0.132333
chr5	33104417	+	NM_019810	Slc5a1	startC	40	4	0.1	39	6	0.154	27	5	0.185	0.146333
chr5	33104480	+	NM_019810	Slc5a1	startC	30	3	0.1	19	3	0.158	14	2	0.143	0.133667
chr5	33160828	+	NM_019810	Slc5a1	stopC	59	8	0.136	50	7	0.14	0	0	0	#
chr5	33160846	+	NM_019810	Slc5a1	stopC	58	8	0.138	0	0	0	0	0	0	#
chr5	33160914	+	NM_019810	Slc5a1	stopC	18	4	0.222	16	4	0.25	21	6	0.286	0.252667
chr5	33162473	+	NM_019810	Slc5a1	3UTR	28	6	0.214	31	7	0.226	29	7	0.241	0.227
chr5	33162594	+	NM_019810	Slc5a1	3UTR	46	6	0.13	40	6	0.15	33	6	0.182	0.154
chr5	36796445	-	NM_026242	Mrfap1	startC	16	3	0.188	17	5	0.294	16	2	0.125	0.202333
chr5	36796448	-	NM_026242	Mrfap1	startC	17	2	0.118	16	2	0.125	17	2	0.118	0.120333
chr5	36796535	-	NM_026242	Mrfap1	startC	10	3	0.3	13	2	0.154	13	2	0.154	0.202667
chr5	44014831	-	NM_008935	Prom1	CDS	10	5	0.5	0	0	0	0	0	0	#
chr5	52741782	+	NM_025951	Pi4k2b	startC	13	2	0.154	11	3	0.273	10	3	0.3	0.242333
chr5	52741866	+	NM_025951	Pi4k2b	startC	14	2	0.143	14	2	0.143	10	1	0.1	0.128667
chr5	52741875	+	NM_025951	Pi4k2b	startC	14	2	0.143	14	2	0.143	10	3	0.3	0.195333
chr5	53049394	+	NM_011402	Slc34a2	5UTR	10	1	0.1	0	0	0	0	0	0	#
chr5	64093003	+	NM_025700	Pgm1	startC	18	3	0.167	20	2	0.1	10	1	0.1	0.122333
chr5	64803592	+	NM_008453	Klf3	5UTR	14	3	0.214	0	0	0	0	0	0	#
chr5	65435657	-	NM_009466	Ugdh	5UTR	33	4	0.121	30	3	0.1	24	3	0.125	0.115333
chr5	65696832	-	NM_001081321	Pds5a	startC	15	3	0.2	16	2	0.125	11	2	0.182	0.169
chr5	65697843	-	NM_001081321	Pds5a	5UTR	11	2	0.182	0	0	0	0	0	0	#
chr5	66025126	-	NM_139065	Rbm47	CDS	13	7	0.538	0	0	0	12	5	0.417	#
chr5	67847262	-	NM_009727	Atp8a1	startC	10	2	0.2	0	0	0	0	0	0	#
chr5	86804357	+	ENSMUST00000119339	Ythdc1	5UTR	13	2	0.154	10	3	0.3	10	2	0.2	0.218
chr5	86804449	+	ENSMUST00000119339	Ythdc1	startC	22	3	0.136	18	2	0.111	16	2	0.125	0.124
chr5	86804465	+	ENSMUST00000119339	Ythdc1	startC	18	2	0.111	17	2	0.118	13	3	0.231	0.153333
chr5	86804469	+	ENSMUST00000119339	Ythdc1	startC	18	3	0.167	19	2	0.105	13	2	0.154	0.142
chr5	86804477	+	ENSMUST00000119339	Ythdc1	startC	16	2	0.125	23	3	0.13	14	4	0.286	0.180333
chr5	86835872	+	NM_177680	Ythdc1	stopC	12	4	0.333	12	4	0.333	0	0	0	#
chr5	86906850	-	NM_153598	Ugt2b34	startC	16	3	0.188	11	2	0.182	11	3	0.273	0.214333
chr5	88526125	-	NM_152839	Igj	CDS	43	7	0.163	0	0	0	0	0	0	#
chr5	88527749	-	NM_152839	Igj	startC	17	3	0.176	18	5	0.278	10	4	0.4	0.284667
chr5	88887030	+	ENSMUST00000148750	Slc4a4	5UTR	15	4	0.267	11	3	0.273	11	3	0.273	0.271
chr5	88887051	+	ENSMUST00000148750	Slc4a4	5UTR	18	2	0.111	16	4	0.25	16	2	0.125	0.162
chr5	88887055	+	ENSMUST00000148750	Slc4a4	5UTR	18	2	0.111	15	2	0.133	15	2	0.133	0.125667
chr5	90365901	-	NM_030886	Ankrd17	startC	24	6	0.25	29	3	0.103	26	3	0.12	0.157667
chr5	90365906	-	NM_030886	Ankrd17	startC	25	4	0.167	30	5	0.167	26	4	0.16	0.164667
chr5	90366131	-	NM_030886	Ankrd17	startC	13	2	0.154	15	2	0.133	14	3	0.214	0.167
chr5	92083555	-	NM_011816	G3bp2	5UTR	12	2	0.167	12	3	0.25	13	4	0.308	0.241667
chr5	93205985	-	NM_017367	Ccni	5UTR	10	2	0.2	11	2	0.182	10	1	0.1	0.160667
chr5	93205998	-	NM_017367	Ccni	5UTR	20	2	0.1	19	2	0.105	19	2	0.105	0.103333
chr5	93206037	-	NM_017367	Ccni	5UTR	44	5	0.116	33	7	0.212	30	4	0.133	0.153667
chr5	93206072	-	NM_017367	Ccni	5UTR	10	2	0.2	17	2	0.118	11	2	0.182	0.166667
chr5	99221401	-	NM_145839	Rasgef1b	CDS	13	5	0.385	0	0	0	0	0	0	#
chr5	99978428	-	NM_007516	Hnrnpd	startC	12	2	0.167	11	4	0.364	10	2	0.2	0.243667
chr5	99978442	-	NM_007516	Hnrnpd	startC	16	3	0.2	16	3	0.188	11	2	0.182	0.19
chr5	99978448	-	NM_007516	Hnrnpd	startC	16	5	0.312	0	0	0	0	0	0	#
chr5	99978466	-	NM_007516	Hnrnpd	startC	15	4	0.267	13	2	0.154	12	5	0.417	0.279333
chr5	99978467	-	NM_007516	Hnrnpd	startC	15	2	0.133	13	5	0.385	13	4	0.308	0.275333
chr5	100036117	-	NM_016690	Hnrnpdl	stopC	10	5	0.5	0	0	0	0	0	0	#
chr5	100416108	-	NM_026969	Sec31a	5UTR	10	2	0.2	12	2	0.167	13	3	0.231	0.199333
chr5	100553987	-	NM_139198	Plac8	3UTR	33	6	0.182	0	0	0	0	0	0	#
chr5	100562727	-	NM_139198	Plac8	startC	12	3	0.25	11	2	0.182	11	2	0.182	0.204667
chr5	100562755	-	NM_139198	Plac8	startC	21	4	0.19	19	3	0.158	22	5	0.227	0.191667
chr5	100572156	-	NM_139198	Plac8	5UTR	46	5	0.109	0	0	0	0	0	0	#
chr5	100572164	-	NM_139198	Plac8	5UTR	49	9	0.184	46	6	0.13	43	8	0.186	0.166667
chr5	100572170	-	NM_139198	Plac8	5UTR	47	9	0.191	44	5	0.114	43	13	0.302	0.202333
chr5	100572178	-	NM_139198	Plac8	5UTR	41	7	0.171	34	4	0.118	36	6	0.167	0.152
chr5	100572182	-	NM_139198	Plac8	5UTR	35	5	0.143	31	4	0.129	31	5	0.161	0.144333
chr5	100572183	-	NM_139198	Plac8	5UTR	33	5	0.152	26	3	0.115	26	5	0.192	0.153
chr5	100572184	-	NM_139198	Plac8	5UTR	26	5	0.192	17	5	0.294	20	6	0.3	0.262
chr5	100572185	-	NM_139198	Plac8	5UTR	22	5	0.227	15	3	0.2	19	6	0.316	0.247667
chr5	103989918	-	NM_053262	Hsd17b11	3UTR	25	4	0.16	21	4	0.19	0	0	0	#
chr5	103990215	-	NM_053262	Hsd17b11	3UTR	29	5	0.172	0	0	0	18	5	0.278	#
chr5	104021609	-	NM_053262	Hsd17b11	startC	16	3	0.188	23	4	0.174	20	3	0.15	0.170667
chr5	104021638	-	NM_053262	Hsd17b11	startC	12	2	0.167	20	2	0.1	17	2	0.118	0.128333
chr5	104021642	-	NM_053262	Hsd17b11	startC	14	2	0.143	19	2	0.105	18	2	0.111	0.119667
chr5	104092742	-	NM_010097	Sparcl1	CDS	19	5	0.263	16	6	0.375	0	0	0	#
chr5	104092960	-	NM_010097	Sparcl1	CDS	27	6	0.222	0	0	0	0	0	0	#
chr5	108583059	-	NM_153569	Gak	CDS	11	5	0.455	0	0	0	0	0	0	#
chr5	113090110	-	NM_172884	2900026A02Rik	3UTR	11	4	0.364	16	4	0.25	17	4	0.235	0.283
chr5	115145331	-	NM_175403	Mlec	3UTR	10	4	0.4	0	0	0	0	0	0	#
chr5	115157873	-	NM_175403	Mlec	startC	17	3	0.176	20	5	0.25	20	4	0.2	0.208667
chr5	115157905	-	NM_175403	Mlec	startC	15	2	0.133	22	3	0.136	15	3	0.2	0.156333
chr5	115158080	-	NM_175403	Mlec	startC	17	3	0.176	18	4	0.222	17	2	0.118	0.172
chr5	115158087	-	NM_175403	Mlec	startC	18	2	0.111	19	2	0.105	17	2	0.118	0.111333
chr5	115249017	-	NM_016698	Rnf10	CDS	32	8	0.25	29	8	0.276	0	0	0	#
chr5	115272387	-	NM_016698	Rnf10	startC	12	2	0.167	13	2	0.154	10	1	0.1	0.140333
chr5	115272390	-	NM_016698	Rnf10	startC	13	2	0.154	0	0	0	0	0	0	#
chr5	115272430	-	NM_016698	Rnf10	startC	40	4	0.103	34	4	0.118	36	8	0.222	0.147667
chr5	115272501	-	NM_016698	Rnf10	startC	37	4	0.108	0	0	0	0	0	0	#
chr5	115272508	-	NM_016698	Rnf10	startC	38	5	0.132	22	3	0.136	24	4	0.167	0.145
chr5	115272513	-	NM_016698	Rnf10	startC	37	7	0.194	20	2	0.1	23	3	0.13	0.141333
chr5	115545753	+	NM_011223	Pxn	CDS	10	4	0.4	15	5	0.333	0	0	0	#
chr5	117115693	-	NM_178622	Suds3	startC	54	6	0.113	39	5	0.128	41	7	0.171	0.137333
chr5	117115709	-	NM_178622	Suds3	startC	46	8	0.174	34	6	0.176	36	6	0.167	0.172333
chr5	119671305	+	NM_011535	Tbx3	5UTR	15	2	0.133	15	2	0.133	16	2	0.125	0.130333
chr5	119671312	+	NM_011535	Tbx3	5UTR	17	3	0.176	16	5	0.312	15	2	0.133	0.207
chr5	119683440	+	NM_011535	Tbx3	3UTR	33	5	0.152	30	5	0.167	24	4	0.167	0.162
chr5	119683444	+	NM_011535	Tbx3	3UTR	36	5	0.143	0	0	0	0	0	0	#
chr5	120613220	+	NM_028041	Ddx54	startC	10	3	0.333	0	0	0	0	0	0	#
chr5	120613246	+	NM_028041	Ddx54	startC	10	3	0.3	0	0	0	0	0	0	#
chr5	120613261	+	NM_028041	Ddx54	startC	11	2	0.182	0	0	0	0	0	0	#
chr5	121191237	-	NM_011202	Ptpn11	startC	11	2	0.182	14	4	0.286	12	3	0.25	0.239333
chr5	121191250	-	NM_011202	Ptpn11	startC	11	2	0.182	0	0	0	0	0	0	#
chr5	122284898	+	NM_177242	Pptc7	CDS	22	6	0.273	0	0	0	0	0	0	#
chr5	122501754	-	NM_009722	Atp2a2	startC	18	3	0.167	18	3	0.167	10	2	0.2	0.178
chr5	122501776	-	NM_009722	Atp2a2	startC	17	2	0.118	19	3	0.158	11	2	0.182	0.152667
chr5	122501780	-	NM_009722	Atp2a2	startC	16	2	0.125	0	0	0	0	0	0	#
chr5	123453492	+	NM_133917	Mlxip	stopC	23	6	0.261	25	7	0.28	22	5	0.227	0.256
chr5	123617668	-	NM_019765	Clip1	CDS	11	6	0.545	0	0	0	12	5	0.417	#
chr5	124001836	+	NM_145070	Hip1r	CDS	13	5	0.385	16	5	0.312	0	0	0	#
chr5	124381872	-	NM_001081203	Sbno1	CDS	13	5	0.385	15	6	0.4	0	0	0	#
chr5	124408507	-	NM_001081203	Sbno1	CDS	15	5	0.333	18	6	0.333	15	5	0.333	0.333
chr5	124723795	+	NM_011596	Atp6v0a2	3UTR	21	4	0.19	0	0	0	0	0	0	#
chr5	125389699	-	uc008zrh.2	Ubc	5UTR	20	3	0.15	14	3	0.214	16	4	0.25	0.204667
chr5	125389701	-	uc008zrh.2	Ubc	5UTR	22	4	0.182	16	3	0.188	18	2	0.111	0.160333
chr5	125389702	-	uc008zrh.2	Ubc	5UTR	22	4	0.182	16	4	0.25	16	3	0.188	0.206667
chr5	125389704	-	uc008zrh.2	Ubc	5UTR	23	6	0.261	19	6	0.316	18	3	0.167	0.248
chr5	125389705	-	uc008zrh.2	Ubc	5UTR	24	5	0.208	19	5	0.263	17	4	0.235	0.235333
chr5	125389707	-	uc008zrh.2	Ubc	5UTR	23	5	0.217	21	7	0.333	19	5	0.263	0.271
chr5	125389708	-	uc008zrh.2	Ubc	5UTR	24	7	0.292	21	9	0.429	20	5	0.25	0.323667
chr5	125389710	-	uc008zrh.2	Ubc	5UTR	25	5	0.2	22	8	0.364	20	5	0.25	0.271333
chr5	125389711	-	uc008zrh.2	Ubc	5UTR	22	3	0.136	22	7	0.318	19	5	0.263	0.239
chr5	125389714	-	uc008zrh.2	Ubc	5UTR	23	6	0.261	21	8	0.381	19	4	0.211	0.284333
chr5	125389725	-	uc008zrh.2	Ubc	5UTR	24	10	0.417	26	13	0.5	19	12	0.632	0.516333
chr5	125389728	-	uc008zrh.2	Ubc	5UTR	26	9	0.346	27	14	0.519	20	8	0.4	0.421667
chr5	125389731	-	uc008zrh.2	Ubc	5UTR	26	11	0.423	29	14	0.483	19	9	0.474	0.46
chr5	125389732	-	uc008zrh.2	Ubc	5UTR	27	12	0.444	30	16	0.533	20	11	0.55	0.509
chr5	125389738	-	uc008zrh.2	Ubc	5UTR	25	12	0.48	26	17	0.654	20	11	0.55	0.561333
chr5	125389741	-	uc008zrh.2	Ubc	5UTR	21	10	0.476	26	16	0.615	18	11	0.611	0.567333
chr5	125389749	-	uc008zrh.2	Ubc	5UTR	11	10	0.909	14	14	1	11	11	1	0.969667
chr5	125389750	-	uc008zrh.2	Ubc	5UTR	10	10	1	15	15	1	11	11	1	1
chr5	129881214	-	NM_024166	Chchd2	stopC	51	9	0.176	50	7	0.14	49	8	0.163	0.159667
chr5	129881269	-	NM_024166	Chchd2	stopC	20	5	0.25	0	0	0	0	0	0	#
chr5	134624488	-	NM_033561	Eif4h	CDS	39	8	0.205	0	0	0	0	0	0	#
chr5	134627745	-	NM_033561	Eif4h	CDS	23	7	0.304	0	0	0	19	6	0.316	#
chr5	134639258	-	NM_033561	Eif4h	startC	23	5	0.217	20	4	0.2	18	3	0.167	0.194667
chr5	134986633	+	NM_009902	Cldn3	startC	14	2	0.143	10	1	0.1	10	1	0.1	0.114333
chr5	134987177	+	NM_009902	Cldn3	stopC	52	8	0.154	42	7	0.167	0	0	0	#
chr5	134987185	+	NM_009902	Cldn3	stopC	50	11	0.22	0	0	0	37	8	0.216	#
chr5	135778542	+	ENSMUST00000019323	Mdh2	startC	12	2	0.167	16	2	0.125	13	3	0.231	0.174333
chr5	135778735	+	NM_008617	Mdh2	startC	23	3	0.13	18	2	0.111	23	3	0.13	0.123667
chr5	135778767	+	NM_008617	Mdh2	startC	43	6	0.14	0	0	0	0	0	0	#
chr5	135778772	+	NM_008617	Mdh2	startC	44	5	0.114	44	6	0.136	47	7	0.149	0.133
chr5	135778799	+	NM_008617	Mdh2	startC	18	2	0.111	18	4	0.222	21	3	0.143	0.158667
chr5	135783440	+	NM_008617	Mdh2	CDS	50	8	0.16	40	7	0.175	0	0	0	#
chr5	135790151	+	NM_008617	Mdh2	stopC	37	9	0.243	22	6	0.273	28	6	0.214	0.243333
chr5	135790158	+	NM_008617	Mdh2	stopC	37	7	0.189	0	0	0	0	0	0	#
chr5	136967884	+	NM_021719	Cldn15	5UTR	21	3	0.143	20	3	0.15	20	2	0.1	0.131
chr5	136967974	+	NM_021719	Cldn15	startC	26	3	0.115	29	4	0.138	19	4	0.211	0.154667
chr5	136975548	+	NM_021719	Cldn15	3UTR	39	6	0.158	45	6	0.133	0	0	0	#
chr5	137135221	-	uc029vpi.1	Muc3	3UTR	22	4	0.182	23	4	0.174	0	0	0	#
chr5	137135227	-	uc029vpi.1	Muc3	3UTR	30	5	0.167	0	0	0	0	0	0	#
chr5	137135413	-	uc029vpi.1	Muc3	stopC	25	5	0.2	27	5	0.185	0	0	0	#
chr5	137135476	-	uc029vpi.1	Muc3	stopC	24	7	0.292	20	5	0.25	0	0	0	#
chr5	137137111	-	uc029vpi.1	Muc3	CDS	12	5	0.417	11	5	0.455	0	0	0	#
chr5	137144003	-	uc029vpi.1	Muc3	CDS	57	9	0.158	0	0	0	0	0	0	#
chr5	137146655	-	uc029vpi.1	Muc3	startC	27	3	0.111	35	5	0.143	30	3	0.1	0.118
chr5	137154052	-	ENSMUST00000111075	Gm3054	stopC	69	9	0.13	50	7	0.14	0	0	0	#
chr5	137154062	-	ENSMUST00000111075	Gm3054	stopC	69	8	0.116	48	7	0.146	50	8	0.16	0.140667
chr5	137154083	-	ENSMUST00000111075	Gm3054	stopC	69	12	0.174	61	7	0.115	55	11	0.2	0.163
chr5	137165919	-	ENSMUST00000111075	Gm3054	startC	30	5	0.167	28	7	0.25	33	4	0.121	0.179333
chr5	137530742	-	NM_010312	Gnb2	startC	20	5	0.25	12	2	0.167	16	2	0.125	0.180667
chr5	137530760	-	NM_010312	Gnb2	startC	15	3	0.2	13	4	0.308	12	2	0.167	0.225
chr5	137747387	+	NM_023910	Tsc22d4	CDS	24	6	0.25	0	0	0	19	6	0.316	#
chr5	139791683	+	NM_010757	Mafk	5UTR	12	3	0.25	11	2	0.182	10	2	0.2	0.210667
chr5	142903171	-	NM_007393	Actb	3UTR	129	18	0.142	129	20	0.155	101	16	0.158	0.151667
chr5	142903216	-	NM_007393	Actb	3UTR	49	7	0.143	46	8	0.174	50	7	0.14	0.152333
chr5	142903239	-	NM_007393	Actb	3UTR	16	7	0.438	18	5	0.278	16	5	0.312	0.342667
chr5	142903250	-	NM_007393	Actb	3UTR	23	5	0.217	23	6	0.261	21	7	0.333	0.270333
chr5	142903251	-	NM_007393	Actb	3UTR	26	7	0.269	26	6	0.231	21	6	0.286	0.262
chr5	142903252	-	NM_007393	Actb	3UTR	24	5	0.208	26	6	0.231	20	4	0.2	0.213
chr5	142903254	-	NM_007393	Actb	3UTR	26	11	0.44	27	11	0.407	21	8	0.381	0.409333
chr5	142903255	-	NM_007393	Actb	3UTR	28	6	0.214	25	5	0.2	22	5	0.227	0.213667
chr5	142903261	-	NM_007393	Actb	3UTR	30	9	0.3	29	12	0.414	24	9	0.375	0.363
chr5	142903266	-	NM_007393	Actb	3UTR	30	7	0.233	31	8	0.258	24	6	0.25	0.247
chr5	142903267	-	NM_007393	Actb	3UTR	29	14	0.483	30	14	0.467	25	13	0.52	0.49
chr5	142903268	-	NM_007393	Actb	3UTR	30	9	0.3	28	9	0.321	24	6	0.25	0.290333
chr5	142903276	-	NM_007393	Actb	3UTR	32	10	0.312	31	8	0.258	20	7	0.35	0.306667
chr5	142903294	-	NM_007393	Actb	3UTR	20	4	0.2	22	6	0.273	0	0	0	#
chr5	142903382	-	NM_007393	Actb	3UTR	259	31	0.12	240	33	0.138	203	33	0.163	0.140333
chr5	142903384	-	NM_007393	Actb	3UTR	261	32	0.123	248	25	0.101	212	22	0.104	0.109333
chr5	142903394	-	NM_007393	Actb	3UTR	267	29	0.109	256	29	0.113	208	24	0.115	0.112333
chr5	142903532	-	NM_007393	Actb	3UTR	38	5	0.132	0	0	0	0	0	0	#
chr5	142903539	-	NM_007393	Actb	3UTR	57	13	0.228	50	6	0.12	44	6	0.136	0.161333
chr5	142903769	-	NM_007393	Actb	stopC	116	12	0.103	98	11	0.112	97	11	0.115	0.11
chr5	142903778	-	NM_007393	Actb	stopC	168	17	0.101	150	15	0.1	146	17	0.116	0.105667
chr5	142903781	-	NM_007393	Actb	stopC	187	20	0.107	162	18	0.111	158	18	0.114	0.110667
chr5	142903792	-	NM_007393	Actb	stopC	213	30	0.141	173	26	0.15	175	21	0.121	0.137333
chr5	142903801	-	NM_007393	Actb	stopC	217	24	0.111	169	19	0.113	176	20	0.114	0.112667
chr5	142904172	-	NM_007393	Actb	CDS	29	7	0.241	32	8	0.25	0	0	0	#
chr5	142904183	-	NM_007393	Actb	CDS	15	5	0.333	28	7	0.25	0	0	0	#
chr5	142904184	-	NM_007393	Actb	CDS	15	7	0.467	27	16	0.593	22	12	0.545	0.535
chr5	142904193	-	NM_007393	Actb	CDS	15	6	0.4	25	9	0.36	24	9	0.375	0.378333
chr5	142904381	-	NM_007393	Actb	CDS	40	9	0.225	39	12	0.308	0	0	0	#
chr5	142904418	-	NM_007393	Actb	CDS	27	7	0.259	0	0	0	0	0	0	#
chr5	142904555	-	NM_007393	Actb	CDS	177	31	0.175	160	20	0.125	137	14	0.102	0.134
chr5	142904621	-	NM_007393	Actb	CDS	53	8	0.151	0	0	0	0	0	0	#
chr5	142904655	-	NM_007393	Actb	CDS	29	7	0.241	12	5	0.417	27	6	0.222	0.293333
chr5	142904661	-	NM_007393	Actb	CDS	36	7	0.194	0	0	0	0	0	0	#
chr5	142904715	-	NM_007393	Actb	CDS	76	10	0.132	0	0	0	0	0	0	#
chr5	142905403	-	NM_007393	Actb	CDS	77	12	0.156	0	0	0	0	0	0	#
chr5	142905576	-	NM_007393	Actb	startC	51	9	0.176	30	4	0.133	40	6	0.15	0.153
chr5	142905585	-	NM_007393	Actb	startC	76	12	0.158	68	11	0.162	68	7	0.104	0.141333
chr5	142905593	-	NM_007393	Actb	startC	126	17	0.135	118	13	0.11	109	13	0.119	0.121333
chr5	142906667	-	NM_007393	Actb	5UTR	50	8	0.16	45	6	0.133	44	9	0.205	0.166
chr5	142906672	-	NM_007393	Actb	5UTR	49	9	0.184	47	9	0.191	38	5	0.132	0.169
chr5	142906680	-	NM_007393	Actb	5UTR	43	7	0.163	42	5	0.119	34	5	0.147	0.143
chr5	142906681	-	NM_007393	Actb	5UTR	39	4	0.103	42	7	0.171	35	7	0.2	0.158
chr5	142906683	-	NM_007393	Actb	5UTR	35	4	0.114	36	6	0.167	30	4	0.133	0.138
chr5	142906686	-	NM_007393	Actb	5UTR	26	5	0.192	30	5	0.167	22	7	0.318	0.225667
chr5	142906691	-	NM_007393	Actb	5UTR	27	5	0.185	27	5	0.185	22	5	0.227	0.199
chr5	142906697	-	NM_007393	Actb	5UTR	19	4	0.211	24	5	0.208	17	3	0.188	0.202333
chr5	142906699	-	NM_007393	Actb	5UTR	19	4	0.211	18	3	0.167	15	2	0.133	0.170333
chr5	142906703	-	NM_007393	Actb	5UTR	17	3	0.176	22	4	0.182	13	3	0.231	0.196333
chr5	142906705	-	NM_007393	Actb	5UTR	16	5	0.312	18	7	0.389	14	4	0.286	0.329
chr5	142906706	-	NM_007393	Actb	5UTR	17	4	0.235	18	6	0.333	14	3	0.214	0.260667
chr5	142906707	-	NM_007393	Actb	5UTR	16	4	0.25	17	4	0.25	14	3	0.214	0.238
chr5	142906709	-	NM_007393	Actb	5UTR	16	4	0.25	17	5	0.294	13	4	0.308	0.284
chr5	142906710	-	NM_007393	Actb	5UTR	16	5	0.312	15	5	0.333	13	3	0.231	0.292
chr5	142906713	-	NM_007393	Actb	5UTR	14	3	0.214	17	4	0.235	12	4	0.333	0.260667
chr5	142906715	-	NM_007393	Actb	5UTR	14	3	0.214	15	4	0.267	11	3	0.273	0.251333
chr5	143403954	+	NM_025841	Kdelr2	startC	12	2	0.167	12	2	0.167	13	2	0.154	0.162667
chr5	143403989	+	NM_025841	Kdelr2	startC	23	6	0.261	14	2	0.143	21	4	0.19	0.198
chr5	143527858	-	NM_009007	Rac1	startC	19	4	0.211	15	2	0.133	10	1	0.1	0.148
chr5	143527866	-	NM_009007	Rac1	startC	17	2	0.118	0	0	0	0	0	0	#
chr5	143527883	-	NM_009007	Rac1	startC	17	3	0.176	17	2	0.118	18	2	0.111	0.135
chr5	143527890	-	NM_009007	Rac1	startC	17	3	0.176	16	6	0.375	16	2	0.125	0.225333
chr5	143527912	-	NM_009007	Rac1	startC	18	3	0.167	14	4	0.286	23	4	0.174	0.209
chr5	144100577	+	NM_001081109	Lmtk2	startC	14	4	0.286	17	4	0.235	11	3	0.273	0.264667
chr5	144100647	+	NM_001081109	Lmtk2	startC	19	2	0.105	18	3	0.167	21	6	0.286	0.186
chr5	144357855	-	NM_025833	Baiap2l1	startC	19	2	0.105	0	0	0	0	0	0	#
chr5	144357863	-	NM_025833	Baiap2l1	startC	19	2	0.105	19	2	0.105	17	3	0.176	0.128667
chr5	144357870	-	NM_025833	Baiap2l1	startC	22	3	0.136	19	4	0.211	18	2	0.111	0.152667
chr5	144357879	-	NM_025833	Baiap2l1	startC	21	4	0.19	14	2	0.143	12	3	0.25	0.194333
chr5	145114314	+	NM_023142	Arpc1b	5UTR	45	5	0.111	37	5	0.135	37	6	0.162	0.136
chr5	145114328	+	NM_023142	Arpc1b	5UTR	45	7	0.156	39	4	0.103	34	6	0.176	0.145
chr5	146735717	-	NM_011669	Usp12	3UTR	10	3	0.3	11	5	0.455	0	0	0	#
chr5	148505452	-	NM_011908	Ubl3	3UTR	11	4	0.364	0	0	0	0	0	0	#
chr5	4058462	+	NM_194462	Akap9	CDS	0	0	0	28	7	0.25	0	0	0	#
chr5	30930759	+	NM_008439	Khk	CDS	0	0	0	16	5	0.312	0	0	0	#
chr5	33161144	+	NM_019810	Slc5a1	stopC	0	0	0	19	5	0.263	0	0	0	#
chr5	33162522	+	NM_019810	Slc5a1	3UTR	0	0	0	19	4	0.211	0	0	0	#
chr5	38561523	-	NM_011715	Wdr1	startC	0	0	0	10	2	0.2	0	0	0	#
chr5	43837492	+	NM_009763	Bst1	CDS	0	0	0	43	8	0.186	40	7	0.175	#
chr5	45512019	+	NM_024434	Lap3	stopC	0	0	0	15	4	0.267	0	0	0	#
chr5	86890658	-	NM_153598	Ugt2b34	3UTR	0	0	0	18	5	0.278	0	0	0	#
chr5	86890667	-	NM_153598	Ugt2b34	3UTR	0	0	0	19	6	0.316	0	0	0	#
chr5	92083549	-	NM_011816	G3bp2	5UTR	0	0	0	12	3	0.25	0	0	0	#
chr5	100553979	-	NM_139198	Plac8	3UTR	0	0	0	26	5	0.192	0	0	0	#
chr5	114363728	-	NM_026145	Kctd10	3UTR	0	0	0	15	5	0.333	0	0	0	#
chr5	115143807	-	NM_175403	Mlec	3UTR	0	0	0	15	5	0.333	0	0	0	#
chr5	115560839	+	NM_007475	Rplp0	CDS	0	0	0	48	11	0.229	0	0	0	#
chr5	119683443	+	NM_011535	Tbx3	3UTR	0	0	0	33	5	0.152	26	6	0.231	#
chr5	134503407	-	NM_009990	Clip2	CDS	0	0	0	26	8	0.308	0	0	0	#
chr5	134621958	-	NM_033561	Eif4h	CDS	0	0	0	23	6	0.261	15	5	0.333	#
chr5	134987076	+	NM_009902	Cldn3	stopC	0	0	0	16	4	0.25	0	0	0	#
chr5	134987386	+	NM_009902	Cldn3	3UTR	0	0	0	20	5	0.25	0	0	0	#
chr5	135783395	+	NM_008617	Mdh2	CDS	0	0	0	13	5	0.385	0	0	0	#
chr5	136968164	+	NM_021719	Cldn15	startC	0	0	0	12	2	0.167	0	0	0	#
chr5	136975556	+	NM_021719	Cldn15	3UTR	0	0	0	43	6	0.14	0	0	0	#
chr5	137135210	-	uc029vpi.1	Muc3	3UTR	0	0	0	12	4	0.333	0	0	0	#
chr5	137135405	-	uc029vpi.1	Muc3	stopC	0	0	0	29	8	0.276	26	5	0.192	#
chr5	137759118	+	NM_023910	Tsc22d4	stopC	0	0	0	10	4	0.4	18	5	0.278	#
chr5	142903238	-	NM_007393	Actb	3UTR	0	0	0	19	4	0.211	0	0	0	#
chr5	142903307	-	NM_007393	Actb	3UTR	0	0	0	18	6	0.333	0	0	0	#
chr5	142904175	-	NM_007393	Actb	CDS	0	0	0	31	9	0.29	0	0	0	#
chr5	142904614	-	NM_007393	Actb	CDS	0	0	0	50	9	0.188	0	0	0	#
chr5	142904722	-	NM_007393	Actb	CDS	0	0	0	61	11	0.18	0	0	0	#
chr5	142905608	-	NM_007393	Actb	startC	0	0	0	188	29	0.154	0	0	0	#
chr5	144100642	+	NM_001081109	Lmtk2	startC	0	0	0	16	2	0.125	0	0	0	#
chr5	25498432	-	NM_001081383	Kmt2c	startC	0	0	0	0	0	0	10	3	0.3	#
chr5	25498437	-	NM_001081383	Kmt2c	startC	0	0	0	0	0	0	10	1	0.1	#
chr5	30933736	-	NM_026770	Cgref1	CDS	0	0	0	0	0	0	19	5	0.263	#
chr5	30933938	-	NM_026770	Cgref1	CDS	0	0	0	0	0	0	10	4	0.4	#
chr5	30955098	-	NM_016703	Preb	3UTR	0	0	0	0	0	0	20	5	0.25	#
chr5	32150496	+	NM_008037	Fosl2	CDS	0	0	0	0	0	0	10	4	0.4	#
chr5	33162500	+	NM_019810	Slc5a1	3UTR	0	0	0	0	0	0	14	4	0.286	#
chr5	33162542	+	NM_019810	Slc5a1	3UTR	0	0	0	0	0	0	24	4	0.167	#
chr5	33162552	+	NM_019810	Slc5a1	3UTR	0	0	0	0	0	0	32	5	0.156	#
chr5	34573872	+	NM_013457	Add1	5UTR	0	0	0	0	0	0	16	2	0.125	#
chr5	36796429	-	NM_026242	Mrfap1	startC	0	0	0	0	0	0	10	1	0.1	#
chr5	45512044	+	NM_024434	Lap3	stopC	0	0	0	0	0	0	13	4	0.308	#
chr5	64092999	+	NM_025700	Pgm1	startC	0	0	0	0	0	0	10	2	0.2	#
chr5	64093011	+	NM_025700	Pgm1	startC	0	0	0	0	0	0	17	3	0.176	#
chr5	64803613	+	NM_008453	Klf3	5UTR	0	0	0	0	0	0	12	2	0.167	#
chr5	66017016	-	NM_139065	Rbm47	3UTR	0	0	0	0	0	0	11	3	0.273	#
chr5	86804370	+	ENSMUST00000119339	Ythdc1	startC	0	0	0	0	0	0	10	1	0.1	#
chr5	86906856	-	NM_153598	Ugt2b34	startC	0	0	0	0	0	0	10	2	0.2	#
chr5	88887031	+	ENSMUST00000148750	Slc4a4	5UTR	0	0	0	0	0	0	16	2	0.125	#
chr5	88887043	+	ENSMUST00000148750	Slc4a4	5UTR	0	0	0	0	0	0	16	2	0.125	#
chr5	92083551	-	NM_011816	G3bp2	5UTR	0	0	0	0	0	0	13	2	0.154	#
chr5	92953008	+	NM_015756	Shroom3	CDS	0	0	0	0	0	0	16	5	0.312	#
chr5	93206042	-	NM_017367	Ccni	5UTR	0	0	0	0	0	0	29	4	0.138	#
chr5	97087056	+	NM_080708	Bmp2k	CDS	0	0	0	0	0	0	10	4	0.4	#
chr5	100363444	-	NM_026969	Sec31a	CDS	0	0	0	0	0	0	19	5	0.263	#
chr5	100389102	-	NM_026969	Sec31a	CDS	0	0	0	0	0	0	27	6	0.222	#
chr5	100572169	-	NM_139198	Plac8	5UTR	0	0	0	0	0	0	45	7	0.156	#
chr5	113090124	-	NM_172884	2900026A02Rik	3UTR	0	0	0	0	0	0	19	4	0.211	#
chr5	115272462	-	NM_016698	Rnf10	startC	0	0	0	0	0	0	28	3	0.107	#
chr5	115327422	+	NM_025573	Srsf9	startC	0	0	0	0	0	0	10	1	0.1	#
chr5	115544972	+	NM_011223	Pxn	CDS	0	0	0	0	0	0	27	6	0.222	#
chr5	117115680	-	NM_178622	Suds3	startC	0	0	0	0	0	0	35	4	0.114	#
chr5	119683915	+	NM_011535	Tbx3	3UTR	0	0	0	0	0	0	16	4	0.25	#
chr5	123749312	-	NM_001005525	Rsrc2	startC	0	0	0	0	0	0	13	2	0.154	#
chr5	130248378	-	NM_023248	Sbds	CDS	0	0	0	0	0	0	10	4	0.4	#
chr5	134503428	-	NM_009990	Clip2	CDS	0	0	0	0	0	0	14	5	0.357	#
chr5	134987366	+	NM_009902	Cldn3	3UTR	0	0	0	0	0	0	23	4	0.174	#
chr5	134987372	+	NM_009902	Cldn3	3UTR	0	0	0	0	0	0	21	4	0.19	#
chr5	136975557	+	NM_021719	Cldn15	3UTR	0	0	0	0	0	0	27	5	0.185	#
chr5	137138229	-	uc029vpi.1	Muc3	CDS	0	0	0	0	0	0	16	5	0.312	#
chr5	137894049	-	NM_007819	Cyp3a13	3UTR	0	0	0	0	0	0	15	4	0.267	#
chr5	142903205	-	NM_007393	Actb	3UTR	0	0	0	0	0	0	53	6	0.113	#
chr5	142904209	-	NM_007393	Actb	CDS	0	0	0	0	0	0	14	5	0.357	#
chr5	142904445	-	NM_007393	Actb	CDS	0	0	0	0	0	0	35	8	0.229	#
chr5	143527932	-	NM_009007	Rac1	startC	0	0	0	0	0	0	22	3	0.136	#
chr5	144285526	-	NM_025833	Baiap2l1	CDS	0	0	0	0	0	0	23	8	0.348	#
chr5	145108475	+	NM_019767	Arpc1a	stopC	0	0	0	0	0	0	16	4	0.25	#
chr5	147077627	+	NM_009087	Polr1d	startC	0	0	0	0	0	0	10	1	0.1	#
chr5	147301993	-	NM_007673	Cdx2	stopC	0	0	0	0	0	0	11	4	0.364	#
chr6	24664691	-	NM_028459	Wasl	startC	20	4	0.2	13	2	0.154	13	3	0.231	0.195
chr6	24664738	-	NM_028459	Wasl	startC	16	2	0.125	18	3	0.167	12	2	0.167	0.153
chr6	28423623	+	ENSMUST00000020717	Arf5	startC	37	4	0.108	35	6	0.171	27	4	0.148	0.142333
chr6	28423639	+	ENSMUST00000020717	Arf5	startC	37	5	0.135	39	4	0.103	31	7	0.226	0.154667
chr6	28423660	+	NM_007480	Arf5	startC	32	5	0.156	29	7	0.241	18	5	0.278	0.225
chr6	28423677	+	NM_007480	Arf5	startC	27	5	0.185	30	4	0.133	15	2	0.133	0.150333
chr6	28423684	+	NM_007480	Arf5	startC	24	6	0.25	22	3	0.136	11	3	0.273	0.219667
chr6	28426555	+	ENSMUST00000020717	Arf5	3UTR	18	4	0.222	23	7	0.304	0	0	0	#
chr6	29891241	+	NM_021414	Ahcyl2	CDS	19	5	0.263	0	0	0	0	0	0	#
chr6	29909918	+	NM_021414	Ahcyl2	3UTR	16	5	0.312	0	0	0	0	0	0	#
chr6	34977117	-	NM_001025573	2010107G12Rik	5UTR	12	2	0.167	14	2	0.143	10	1	0.1	0.136667
chr6	34977138	-	NM_001025573	2010107G12Rik	5UTR	11	3	0.273	0	0	0	0	0	0	#
chr6	35539585	-	NM_008098	Mtpn	startC	23	3	0.13	23	3	0.13	19	2	0.105	0.121667
chr6	35539593	-	NM_008098	Mtpn	startC	23	3	0.13	0	0	0	0	0	0	#
chr6	38551796	+	NM_138680	Luc7l2	startC	18	3	0.167	15	3	0.2	12	2	0.167	0.178
chr6	38551797	+	NM_138680	Luc7l2	startC	18	2	0.111	14	5	0.357	11	4	0.364	0.277333
chr6	38818913	-	NM_010433	Hipk2	CDS	16	5	0.312	0	0	0	15	7	0.467	#
chr6	38875930	-	NM_010433	Hipk2	startC	15	3	0.2	11	2	0.182	12	2	0.167	0.183
chr6	38875941	-	NM_010433	Hipk2	startC	13	6	0.462	11	2	0.182	11	3	0.273	0.305667
chr6	38875977	-	NM_010433	Hipk2	startC	24	3	0.125	17	3	0.176	17	2	0.118	0.139667
chr6	38875990	-	NM_010433	Hipk2	startC	28	3	0.107	0	0	0	0	0	0	#
chr6	38876000	-	NM_010433	Hipk2	startC	28	6	0.214	19	4	0.211	21	5	0.238	0.221
chr6	39420146	-	NM_018810	Mkrn1	startC	15	2	0.133	0	0	0	0	0	0	#
chr6	40628944	+	NM_001171003	Mgam	5UTR	10	2	0.2	0	0	0	0	0	0	#
chr6	40628969	+	NM_001171003	Mgam	5UTR	18	3	0.167	25	4	0.16	19	4	0.211	0.179333
chr6	40628978	+	NM_001171003	Mgam	5UTR	13	2	0.154	21	5	0.238	18	3	0.167	0.186333
chr6	40672490	+	NM_001171003	Mgam	CDS	34	7	0.206	27	7	0.259	30	8	0.267	0.244
chr6	40672494	+	NM_001171003	Mgam	CDS	36	7	0.194	27	6	0.222	28	6	0.214	0.21
chr6	40675341	+	NM_001171003	Mgam	CDS	69	10	0.145	52	8	0.157	55	12	0.218	0.173333
chr6	40756345	+	NM_001171003	Mgam	CDS	46	8	0.174	0	0	0	39	10	0.256	#
chr6	40764202	+	NM_001171003	Mgam	CDS	21	6	0.286	0	0	0	0	0	0	#
chr6	40764227	+	NM_001171003	Mgam	CDS	64	11	0.172	52	9	0.173	0	0	0	#
chr6	40764238	+	NM_001171003	Mgam	CDS	71	11	0.155	0	0	0	0	0	0	#
chr6	40764247	+	NM_001171003	Mgam	CDS	67	9	0.134	58	12	0.207	50	8	0.16	0.167
chr6	47813322	-	NM_009787	Pdia4	startC	13	2	0.154	0	0	0	0	0	0	#
chr6	48895282	+	NM_029638	Aoc1	5UTR	10	3	0.3	13	6	0.462	12	3	0.25	0.337333
chr6	48905218	+	NM_029638	Aoc1	startC	13	2	0.154	12	2	0.167	14	2	0.143	0.154667
chr6	48905319	+	NM_029638	Aoc1	startC	21	3	0.143	12	3	0.25	11	2	0.182	0.191667
chr6	48906008	+	NM_029638	Aoc1	CDS	39	7	0.179	0	0	0	0	0	0	#
chr6	48906727	+	NM_029638	Aoc1	CDS	27	6	0.222	0	0	0	0	0	0	#
chr6	48908656	+	NM_029638	Aoc1	stopC	39	8	0.205	0	0	0	34	7	0.206	#
chr6	48908839	+	NM_029638	Aoc1	stopC	63	7	0.111	0	0	0	43	6	0.14	#
chr6	51469826	-	NM_016806	Hnrnpa2b1	startC	10	1	0.1	15	3	0.2	10	1	0.1	0.133333
chr6	51469827	-	NM_016806	Hnrnpa2b1	startC	10	2	0.2	15	2	0.133	10	2	0.2	0.177667
chr6	54327015	+	NM_030024	Prr15	5UTR	64	8	0.125	56	6	0.107	53	6	0.113	0.115
chr6	54327021	+	NM_030024	Prr15	5UTR	63	7	0.115	55	6	0.109	51	6	0.118	0.114
chr6	54327065	+	NM_030024	Prr15	5UTR	16	2	0.125	15	2	0.133	17	3	0.176	0.144667
chr6	54327095	+	NM_030024	Prr15	5UTR	16	2	0.125	15	2	0.133	18	2	0.111	0.123
chr6	54327105	+	NM_030024	Prr15	5UTR	13	2	0.154	11	2	0.182	17	2	0.118	0.151333
chr6	55347737	+	NM_007472	Aqp1	3UTR	15	5	0.357	15	4	0.267	0	0	0	#
chr6	55347755	+	NM_007472	Aqp1	3UTR	16	5	0.312	0	0	0	0	0	0	#
chr6	67015808	+	NM_025278	Gng12	startC	52	7	0.135	51	6	0.118	44	7	0.159	0.137333
chr6	67018476	+	NM_025278	Gng12	3UTR	20	4	0.2	15	4	0.267	0	0	0	#
chr6	67037270	-	NM_007836	Gadd45a	startC	13	4	0.308	12	4	0.333	13	2	0.154	0.265
chr6	71201731	+	NM_017399	Fabp1	CDS	85	10	0.118	0	0	0	77	10	0.13	#
chr6	71201764	+	NM_017399	Fabp1	CDS	267	40	0.15	249	28	0.112	235	35	0.149	0.137
chr6	71440153	-	NM_024288	Rmnd5a	startC	12	2	0.167	12	3	0.25	10	3	0.3	0.239
chr6	71440155	-	NM_024288	Rmnd5a	startC	10	2	0.2	13	4	0.308	10	2	0.2	0.236
chr6	71494522	+	NM_009543	Rnf103	startC	14	3	0.214	0	0	0	0	0	0	#
chr6	71494563	+	NM_009543	Rnf103	startC	15	3	0.2	10	2	0.2	14	3	0.214	0.204667
chr6	71882559	-	uc009chp.1	Ptcd3	5UTR	49	11	0.224	49	11	0.224	45	9	0.2	0.216
chr6	71882560	-	uc009chp.1	Ptcd3	5UTR	51	10	0.196	49	17	0.347	47	13	0.277	0.273333
chr6	71882565	-	uc009chp.1	Ptcd3	5UTR	58	10	0.172	53	11	0.212	52	14	0.275	0.219667
chr6	71882571	-	uc009chp.1	Ptcd3	5UTR	56	10	0.179	56	13	0.236	50	11	0.22	0.211667
chr6	71882572	-	uc009chp.1	Ptcd3	5UTR	59	11	0.186	52	12	0.231	55	12	0.218	0.211667
chr6	71882578	-	uc009chp.1	Ptcd3	5UTR	62	10	0.161	56	11	0.196	51	10	0.196	0.184333
chr6	71882585	-	uc009chp.1	Ptcd3	5UTR	64	16	0.25	54	14	0.259	55	12	0.218	0.242333
chr6	71882589	-	uc009chp.1	Ptcd3	5UTR	56	6	0.107	51	9	0.176	54	9	0.167	0.15
chr6	78371227	+	NM_011036	Reg3b	startC	54	7	0.13	54	6	0.111	40	4	0.1	0.113667
chr6	78372856	+	NM_011036	Reg3b	CDS	117	16	0.137	85	11	0.129	101	16	0.158	0.141333
chr6	78372913	+	NM_011036	Reg3b	CDS	112	14	0.125	102	15	0.147	90	12	0.133	0.135
chr6	78466328	-	NM_011260	Reg3g	stopC	35	9	0.257	35	6	0.171	25	5	0.2	0.209333
chr6	78467571	-	NM_011260	Reg3g	CDS	63	9	0.145	58	9	0.155	0	0	0	#
chr6	78468505	-	NM_011260	Reg3g	startC	54	9	0.167	52	8	0.154	39	4	0.103	0.141333
chr6	78468515	-	NM_011260	Reg3g	startC	59	6	0.102	60	9	0.15	43	7	0.163	0.138333
chr6	78468518	-	NM_011260	Reg3g	startC	61	9	0.148	0	0	0	0	0	0	#
chr6	78468530	-	NM_011260	Reg3g	startC	53	7	0.132	52	7	0.137	38	5	0.132	0.133667
chr6	84908153	-	NM_177077	Exoc6b	CDS	17	5	0.294	0	0	0	14	5	0.357	#
chr6	85069345	-	NM_177077	Exoc6b	startC	15	6	0.4	0	0	0	0	0	0	#
chr6	86525565	-	NM_011865	Pcbp1	CDS	18	6	0.333	0	0	0	0	0	0	#
chr6	86525754	-	NM_011865	Pcbp1	startC	21	5	0.238	14	3	0.214	14	5	0.357	0.269667
chr6	86525910	-	NM_011865	Pcbp1	startC	40	9	0.225	31	4	0.129	32	6	0.188	0.180667
chr6	86525939	-	NM_011865	Pcbp1	startC	23	5	0.217	17	5	0.294	15	2	0.133	0.214667
chr6	86525986	-	NM_011865	Pcbp1	startC	22	3	0.136	15	3	0.2	12	4	0.333	0.223
chr6	86525996	-	NM_011865	Pcbp1	startC	20	4	0.2	21	3	0.143	16	3	0.188	0.177
chr6	86526021	-	NM_011865	Pcbp1	startC	28	3	0.107	27	4	0.148	20	2	0.1	0.118333
chr6	86526049	-	NM_011865	Pcbp1	startC	26	3	0.115	25	3	0.12	18	2	0.111	0.115333
chr6	86526106	-	NM_011865	Pcbp1	startC	14	3	0.214	11	3	0.273	11	2	0.182	0.223
chr6	86650834	-	NM_010751	Mxd1	stopC	13	4	0.308	13	4	0.308	0	0	0	#
chr6	86650955	-	NM_010751	Mxd1	stopC	25	5	0.2	26	6	0.231	20	6	0.3	0.243667
chr6	86650982	-	NM_010751	Mxd1	stopC	26	5	0.192	23	5	0.217	16	6	0.375	0.261333
chr6	86651045	-	NM_010751	Mxd1	stopC	29	12	0.414	17	5	0.294	0	0	0	#
chr6	86651051	-	NM_010751	Mxd1	stopC	31	9	0.29	19	8	0.421	26	7	0.269	0.326667
chr6	86651057	-	NM_010751	Mxd1	stopC	41	14	0.341	21	5	0.238	32	8	0.25	0.276333
chr6	86651063	-	NM_010751	Mxd1	stopC	40	12	0.3	22	8	0.364	30	12	0.4	0.354667
chr6	86651069	-	NM_010751	Mxd1	stopC	39	10	0.256	22	5	0.227	29	5	0.172	0.218333
chr6	86651074	-	NM_010751	Mxd1	CDS	46	10	0.217	27	6	0.222	0	0	0	#
chr6	86651468	-	NM_010751	Mxd1	CDS	74	13	0.176	0	0	0	51	8	0.157	#
chr6	86651477	-	NM_010751	Mxd1	CDS	71	10	0.141	55	9	0.164	52	8	0.154	0.153
chr6	86651514	-	NM_010751	Mxd1	CDS	37	8	0.216	0	0	0	0	0	0	#
chr6	86668945	-	NM_010751	Mxd1	startC	19	2	0.105	14	2	0.143	18	3	0.167	0.138333
chr6	86669018	-	NM_010751	Mxd1	startC	14	3	0.214	13	4	0.308	13	4	0.308	0.276667
chr6	86737005	-	NM_013471	Anxa4	3UTR	12	3	0.25	0	0	0	0	0	0	#
chr6	86737010	-	NM_013471	Anxa4	3UTR	14	6	0.429	0	0	0	0	0	0	#
chr6	86737141	-	NM_013471	Anxa4	3UTR	28	7	0.25	19	4	0.211	23	4	0.174	0.211667
chr6	86751066	-	NM_013471	Anxa4	CDS	68	9	0.132	0	0	0	56	9	0.161	#
chr6	86753869	-	NM_013471	Anxa4	CDS	72	9	0.127	0	0	0	0	0	0	#
chr6	86754897	-	NM_013471	Anxa4	CDS	33	7	0.212	0	0	0	0	0	0	#
chr6	88518732	-	NM_016906	Sec61a1	startC	10	2	0.2	10	2	0.2	10	1	0.1	0.166667
chr6	119355596	-	NM_197985	Adipor2	3UTR	23	4	0.174	16	4	0.25	0	0	0	#
chr6	119388546	-	uc009dmd.1	Adipor2	5UTR	10	3	0.3	13	3	0.231	15	3	0.2	0.243667
chr6	119388555	-	uc009dmd.1	Adipor2	5UTR	11	2	0.182	17	2	0.118	17	2	0.118	0.139333
chr6	119388575	-	uc009dmd.1	Adipor2	5UTR	15	2	0.133	20	2	0.1	20	2	0.1	0.111
chr6	122312329	+	NM_010749	M6pr	startC	15	2	0.133	10	1	0.1	13	2	0.154	0.129
chr6	124663245	+	NM_145130	Lpcat3	startC	21	3	0.143	16	3	0.188	16	2	0.125	0.152
chr6	124702436	+	NM_145130	Lpcat3	CDS	18	5	0.278	0	0	0	0	0	0	#
chr6	124712419	+	NM_007531	Phb2	startC	16	7	0.438	12	5	0.417	10	3	0.3	0.385
chr6	124712423	+	NM_007531	Phb2	startC	15	5	0.333	11	4	0.364	10	1	0.1	0.265667
chr6	124712457	+	NM_007531	Phb2	startC	15	2	0.133	0	0	0	0	0	0	#
chr6	124712483	+	NM_007531	Phb2	startC	13	2	0.154	11	2	0.182	17	3	0.176	0.170667
chr6	124741226	-	ENSMUST00000004389	Grcc10	5UTR	48	37	0.771	45	33	0.733	42	28	0.667	0.723667
chr6	124741227	-	ENSMUST00000004389	Grcc10	5UTR	50	38	0.76	49	38	0.776	44	30	0.682	0.739333
chr6	124741228	-	ENSMUST00000004389	Grcc10	5UTR	53	41	0.774	46	35	0.761	43	28	0.651	0.728667
chr6	124741229	-	ENSMUST00000004389	Grcc10	5UTR	51	39	0.765	47	38	0.809	46	32	0.696	0.756667
chr6	124741236	-	ENSMUST00000004389	Grcc10	5UTR	58	45	0.776	57	46	0.807	52	39	0.75	0.777667
chr6	124741240	-	ENSMUST00000004389	Grcc10	5UTR	57	44	0.772	53	42	0.792	55	41	0.745	0.769667
chr6	124741243	-	ENSMUST00000004389	Grcc10	5UTR	61	47	0.77	58	44	0.759	57	42	0.737	0.755333
chr6	124741247	-	ENSMUST00000004389	Grcc10	5UTR	57	43	0.754	55	41	0.745	57	42	0.737	0.745333
chr6	124741255	-	ENSMUST00000004389	Grcc10	5UTR	61	46	0.754	57	43	0.754	57	41	0.719	0.742333
chr6	124741259	-	ENSMUST00000004389	Grcc10	5UTR	58	48	0.828	57	46	0.807	56	43	0.768	0.801
chr6	124741273	-	ENSMUST00000004389	Grcc10	5UTR	37	25	0.676	36	25	0.694	37	25	0.676	0.682
chr6	124741275	-	ENSMUST00000004389	Grcc10	5UTR	28	19	0.679	34	20	0.588	33	22	0.667	0.644667
chr6	124741278	-	ENSMUST00000004389	Grcc10	5UTR	19	18	0.947	22	19	0.864	23	19	0.826	0.879
chr6	124814102	-	NM_009415	Tpi1	startC	23	4	0.174	18	4	0.222	18	4	0.222	0.206
chr6	124914219	-	NM_026988	Ptms	stopC	26	6	0.231	0	0	0	0	0	0	#
chr6	124914951	-	NM_026988	Ptms	CDS	70	12	0.171	65	9	0.141	0	0	0	#
chr6	124914952	-	NM_026988	Ptms	CDS	71	10	0.141	0	0	0	66	15	0.227	#
chr6	124917719	-	NM_026988	Ptms	startC	10	1	0.1	14	3	0.214	14	2	0.143	0.152333
chr6	124917757	-	NM_026988	Ptms	startC	17	2	0.118	0	0	0	0	0	0	#
chr6	124917760	-	NM_026988	Ptms	startC	19	2	0.105	20	3	0.15	19	2	0.105	0.12
chr6	124917783	-	NM_026988	Ptms	startC	25	3	0.12	22	3	0.136	21	3	0.143	0.133
chr6	124917803	-	NM_026988	Ptms	startC	29	3	0.103	30	5	0.167	21	4	0.19	0.153333
chr6	124917838	-	NM_026988	Ptms	5UTR	29	3	0.103	32	4	0.125	23	3	0.13	0.119333
chr6	124932107	+	NM_145385	Mlf2	startC	21	4	0.19	17	3	0.176	15	4	0.267	0.211
chr6	124932110	+	NM_145385	Mlf2	startC	19	2	0.105	16	3	0.188	14	2	0.143	0.145333
chr6	125010395	+	NM_175557	Zfp384	5UTR	10	2	0.2	12	2	0.167	13	4	0.308	0.225
chr6	125165310	-	NM_008084	Gapdh	startC	11	3	0.273	0	0	0	0	0	0	#
chr6	125231627	-	NM_145391	Tapbpl	startC	12	5	0.417	12	5	0.417	15	7	0.467	0.433667
chr6	125231630	-	NM_145391	Tapbpl	startC	14	2	0.143	15	5	0.333	19	2	0.105	0.193667
chr6	125231642	-	NM_145391	Tapbpl	startC	15	2	0.133	16	3	0.188	19	2	0.105	0.142
chr6	127126702	-	NM_009829	Ccnd2	3UTR	17	4	0.235	0	0	0	11	4	0.364	#
chr6	127127586	-	NM_009829	Ccnd2	3UTR	12	3	0.273	0	0	0	0	0	0	#
chr6	128662514	+	NM_053165	Clec2h	startC	42	7	0.167	41	9	0.22	39	4	0.103	0.163333
chr6	128674109	+	NM_053165	Clec2h	CDS	17	5	0.294	0	0	0	0	0	0	#
chr6	128675814	+	NM_053165	Clec2h	stopC	36	6	0.167	0	0	0	33	8	0.242	#
chr6	128676091	+	NM_053165	Clec2h	stopC	84	13	0.155	71	10	0.141	63	8	0.127	0.141
chr6	131388123	-	NM_011733	Ybx3	startC	18	3	0.167	13	5	0.385	10	1	0.1	0.217333
chr6	131388128	-	NM_011733	Ybx3	startC	16	2	0.125	0	0	0	0	0	0	#
chr6	131388170	-	NM_011733	Ybx3	startC	49	17	0.347	46	13	0.283	37	11	0.297	0.309
chr6	131388191	-	NM_011733	Ybx3	startC	45	5	0.111	46	5	0.109	35	4	0.114	0.111333
chr6	131388298	-	NM_011733	Ybx3	startC	13	3	0.231	0	0	0	0	0	0	#
chr6	131388343	-	NM_011733	Ybx3	startC	26	3	0.115	0	0	0	0	0	0	#
chr6	131388345	-	NM_011733	Ybx3	startC	25	3	0.12	19	5	0.263	24	6	0.25	0.211
chr6	134920956	+	NM_009875	Cdkn1b	startC	18	2	0.111	16	2	0.125	15	2	0.133	0.123
chr6	136781679	-	NM_145067	Gucy2c	startC	12	2	0.167	13	2	0.154	10	3	0.3	0.207
chr6	136781689	-	NM_145067	Gucy2c	startC	14	2	0.143	15	3	0.2	13	2	0.154	0.165667
chr6	136781698	-	NM_145067	Gucy2c	startC	18	4	0.222	18	4	0.222	18	2	0.111	0.185
chr6	138147660	+	NM_019946	Mgst1	startC	16	4	0.25	13	2	0.154	16	2	0.125	0.176333
chr6	145250128	-	NM_021284	Kras	5UTR	15	3	0.2	23	4	0.174	15	3	0.2	0.191333
chr6	28426546	+	ENSMUST00000020717	Arf5	3UTR	0	0	0	19	5	0.263	18	6	0.333	#
chr6	28426561	+	ENSMUST00000020717	Arf5	3UTR	0	0	0	23	4	0.174	18	5	0.278	#
chr6	32968211	-	NM_025336	Chchd3	CDS	0	0	0	22	6	0.273	0	0	0	#
chr6	34746560	+	uc009bhl.1	Cald1	CDS	0	0	0	18	5	0.294	0	0	0	#
chr6	40658227	+	NM_001171003	Mgam	CDS	0	0	0	27	6	0.222	0	0	0	#
chr6	40768815	+	NM_001171003	Mgam	3UTR	0	0	0	21	4	0.19	0	0	0	#
chr6	48905318	+	NM_029638	Aoc1	startC	0	0	0	12	2	0.167	0	0	0	#
chr6	48905321	+	NM_029638	Aoc1	startC	0	0	0	10	3	0.3	0	0	0	#
chr6	48906127	+	NM_029638	Aoc1	CDS	0	0	0	18	5	0.278	0	0	0	#
chr6	51466201	-	NM_016806	Hnrnpa2b1	CDS	0	0	0	20	6	0.3	0	0	0	#
chr6	52737140	+	NM_025816	Tax1bp1	CDS	0	0	0	18	5	0.278	0	0	0	#
chr6	71560977	+	NM_025783	Chmp3	CDS	0	0	0	15	5	0.333	0	0	0	#
chr6	71579714	+	NM_025783	Chmp3	stopC	0	0	0	31	7	0.226	0	0	0	#
chr6	83057537	+	NM_007517	Aup1	stopC	0	0	0	23	7	0.304	13	4	0.308	#
chr6	86526099	-	NM_011865	Pcbp1	startC	0	0	0	11	2	0.182	0	0	0	#
chr6	86649271	-	NM_010751	Mxd1	3UTR	0	0	0	13	4	0.308	0	0	0	#
chr6	86650980	-	NM_010751	Mxd1	stopC	0	0	0	27	5	0.185	0	0	0	#
chr6	90571980	+	NM_027406	Aldh1l1	CDS	0	0	0	35	7	0.2	0	0	0	#
chr6	108829223	+	NM_138677	Edem1	CDS	0	0	0	18	7	0.389	0	0	0	#
chr6	119370288	-	NM_197985	Adipor2	startC	0	0	0	10	2	0.2	0	0	0	#
chr6	125105297	+	NM_145979	Chd4	CDS	0	0	0	29	7	0.241	0	0	0	#
chr6	125231626	-	NM_145391	Tapbpl	startC	0	0	0	12	2	0.167	0	0	0	#
chr6	131365210	-	NM_011733	Ybx3	3UTR	0	0	0	15	4	0.267	0	0	0	#
chr6	131388178	-	NM_011733	Ybx3	startC	0	0	0	49	6	0.122	0	0	0	#
chr6	143167585	+	NM_029250	Etnk1	startC	0	0	0	10	2	0.2	0	0	0	#
chr6	24664695	-	NM_028459	Wasl	startC	0	0	0	0	0	0	14	3	0.214	#
chr6	24664748	-	NM_028459	Wasl	startC	0	0	0	0	0	0	10	1	0.1	#
chr6	28423672	+	NM_007480	Arf5	startC	0	0	0	0	0	0	17	2	0.118	#
chr6	29910722	+	NM_021414	Ahcyl2	3UTR	0	0	0	0	0	0	19	4	0.211	#
chr6	38745688	-	NM_010433	Hipk2	CDS	0	0	0	0	0	0	19	5	0.263	#
chr6	38875942	-	NM_010433	Hipk2	startC	0	0	0	0	0	0	12	2	0.167	#
chr6	38875983	-	NM_010433	Hipk2	startC	0	0	0	0	0	0	22	3	0.136	#
chr6	40768851	+	NM_001171003	Mgam	3UTR	0	0	0	0	0	0	11	3	0.273	#
chr6	43273219	+	NM_133674	Arhgef5	CDS	0	0	0	0	0	0	12	6	0.5	#
chr6	48905213	+	NM_029638	Aoc1	startC	0	0	0	0	0	0	14	4	0.286	#
chr6	48906158	+	NM_029638	Aoc1	CDS	0	0	0	0	0	0	34	7	0.206	#
chr6	48908715	+	NM_029638	Aoc1	stopC	0	0	0	0	0	0	35	8	0.229	#
chr6	67015771	+	NM_025278	Gng12	startC	0	0	0	0	0	0	18	2	0.111	#
chr6	71874873	+	NM_029673	Immt	stopC	0	0	0	0	0	0	14	5	0.357	#
chr6	72598739	+	NM_026159	Retsat	startC	0	0	0	0	0	0	10	1	0.1	#
chr6	72611707	-	NM_009443	Tgoln1	3UTR	0	0	0	0	0	0	23	6	0.261	#
chr6	72616302	-	NM_009443	Tgoln1	CDS	0	0	0	0	0	0	19	5	0.263	#
chr6	78372130	+	NM_011036	Reg3b	CDS	0	0	0	0	0	0	19	5	0.263	#
chr6	78372904	+	NM_011036	Reg3b	CDS	0	0	0	0	0	0	84	13	0.155	#
chr6	78466850	-	NM_011260	Reg3g	CDS	0	0	0	0	0	0	24	6	0.25	#
chr6	83527400	-	NM_009610	Actg2	startC	0	0	0	0	0	0	10	1	0.1	#
chr6	86526117	-	NM_011865	Pcbp1	5UTR	0	0	0	0	0	0	14	2	0.143	#
chr6	86651450	-	NM_010751	Mxd1	CDS	0	0	0	0	0	0	44	8	0.182	#
chr6	86653132	-	NM_010751	Mxd1	CDS	0	0	0	0	0	0	19	6	0.316	#
chr6	86751065	-	NM_013471	Anxa4	CDS	0	0	0	0	0	0	54	8	0.148	#
chr6	87088773	+	NM_013528	Gfpt1	3UTR	0	0	0	0	0	0	15	4	0.267	#
chr6	87089907	+	NM_013528	Gfpt1	3UTR	0	0	0	0	0	0	12	4	0.333	#
chr6	87089927	+	NM_013528	Gfpt1	3UTR	0	0	0	0	0	0	13	4	0.308	#
chr6	88518703	-	NM_016906	Sec61a1	startC	0	0	0	0	0	0	14	4	0.286	#
chr6	124814087	-	NM_009415	Tpi1	startC	0	0	0	0	0	0	20	3	0.15	#
chr6	124917744	-	NM_026988	Ptms	startC	0	0	0	0	0	0	16	2	0.125	#
chr6	124917818	-	NM_026988	Ptms	5UTR	0	0	0	0	0	0	17	2	0.118	#
chr6	124917839	-	NM_026988	Ptms	5UTR	0	0	0	0	0	0	20	4	0.2	#
chr6	124931528	+	NM_145385	Mlf2	5UTR	0	0	0	0	0	0	16	2	0.125	#
chr6	127129913	-	NM_009829	Ccnd2	3UTR	0	0	0	0	0	0	17	4	0.235	#
chr6	128675785	+	NM_053165	Clec2h	stopC	0	0	0	0	0	0	26	5	0.192	#
chr6	131388140	-	NM_011733	Ybx3	startC	0	0	0	0	0	0	13	2	0.154	#
chr6	131388190	-	NM_011733	Ybx3	startC	0	0	0	0	0	0	37	5	0.135	#
chr6	131388349	-	NM_011733	Ybx3	startC	0	0	0	0	0	0	24	3	0.125	#
chr6	134566789	-	NM_008514	Lrp6	startC	0	0	0	0	0	0	10	1	0.1	#
chr6	134920972	+	NM_009875	Cdkn1b	startC	0	0	0	0	0	0	13	2	0.154	#
chr6	137522162	-	NM_007945	Eps8	CDS	0	0	0	0	0	0	16	5	0.312	#
chr6	143167580	+	NM_029250	Etnk1	startC	0	0	0	0	0	0	11	2	0.182	#
chr6	145250123	-	NM_021284	Kras	5UTR	0	0	0	0	0	0	13	2	0.154	#
chr7	3692857	-	NM_029934	Mboat7	5UTR	14	4	0.286	0	0	0	0	0	0	#
chr7	3704436	+	NM_029767	Rps9	startC	22	3	0.136	19	4	0.211	18	2	0.111	0.152667
chr7	4646866	-	NM_172894	Ppp6r1	startC	14	2	0.143	17	4	0.235	10	2	0.2	0.192667
chr7	4646871	-	NM_172894	Ppp6r1	startC	13	2	0.154	18	2	0.111	10	2	0.2	0.155
chr7	4658897	-	NM_172894	Ppp6r1	5UTR	11	2	0.182	10	1	0.1	10	1	0.1	0.127333
chr7	12922350	+	NM_009095	Rps5	5UTR	22	4	0.182	0	0	0	15	2	0.133	#
chr7	12923002	+	NM_009095	Rps5	startC	24	3	0.125	32	4	0.125	24	3	0.125	0.125
chr7	12923054	+	NM_009095	Rps5	startC	29	3	0.103	28	6	0.214	23	4	0.174	0.163667
chr7	13037634	-	NM_145578	Ube2m	startC	17	2	0.118	17	2	0.118	11	2	0.182	0.139333
chr7	13037636	-	NM_145578	Ube2m	startC	19	4	0.211	18	3	0.167	13	2	0.154	0.177333
chr7	13037711	-	NM_145578	Ube2m	startC	18	5	0.278	13	3	0.231	10	2	0.2	0.236333
chr7	13037715	-	NM_145578	Ube2m	startC	19	2	0.105	13	3	0.231	10	1	0.1	0.145333
chr7	15945970	-	NM_133831	Gltscr2	startC	14	2	0.143	0	0	0	0	0	0	#
chr7	16749206	+	NM_198613	Ap2s1	stopC	16	4	0.25	0	0	0	0	0	0	#
chr7	16923891	-	NM_007590	Calm3	startC	52	8	0.154	47	5	0.106	43	9	0.209	0.156333
chr7	16923894	-	NM_007590	Calm3	startC	53	6	0.113	46	5	0.109	42	5	0.119	0.113667
chr7	16923933	-	NM_007590	Calm3	startC	21	4	0.19	0	0	0	0	0	0	#
chr7	17027757	-	NM_011155	Ppp5c	startC	19	4	0.211	16	4	0.25	12	2	0.167	0.209333
chr7	17027769	-	NM_011155	Ppp5c	startC	21	3	0.143	18	2	0.111	17	2	0.118	0.124
chr7	19515238	+	NM_025960	Trappc6a	CDS	16	6	0.375	16	5	0.312	0	0	0	#
chr7	19561983	-	NM_199149	Ppp1r37	startC	16	3	0.188	0	0	0	0	0	0	#
chr7	19561992	-	NM_199149	Ppp1r37	startC	11	2	0.2	18	3	0.167	13	2	0.154	0.173667
chr7	19696745	-	NM_009696	Apoe	CDS	28	6	0.214	0	0	0	0	0	0	#
chr7	19698221	-	NM_009696	Apoe	startC	33	5	0.152	18	3	0.167	30	3	0.1	0.139667
chr7	19796653	-	NM_023224	Cblc	startC	10	2	0.2	14	2	0.143	10	1	0.1	0.147667
chr7	19796654	-	NM_023224	Cblc	startC	10	1	0.1	0	0	0	0	0	0	#
chr7	24888910	+	NM_023133	Rps19	CDS	99	16	0.165	84	12	0.145	95	13	0.138	0.149333
chr7	28071609	+	NM_001122603	Fcgbp	startC	14	5	0.357	14	5	0.357	12	3	0.25	0.321333
chr7	28071617	+	NM_001122603	Fcgbp	startC	19	6	0.316	13	3	0.231	11	2	0.182	0.243
chr7	28075175	+	NM_001122603	Fcgbp	CDS	165	17	0.103	147	18	0.123	132	15	0.114	0.113333
chr7	28075279	+	NM_001122603	Fcgbp	CDS	74	11	0.149	0	0	0	0	0	0	#
chr7	28085096	+	NM_001122603	Fcgbp	CDS	204	22	0.108	187	24	0.128	168	24	0.144	0.126667
chr7	28085107	+	NM_001122603	Fcgbp	CDS	192	27	0.141	182	24	0.133	159	16	0.101	0.125
chr7	28085301	+	NM_001122603	Fcgbp	CDS	132	15	0.114	118	12	0.102	96	12	0.126	0.114
chr7	28085315	+	NM_001122603	Fcgbp	CDS	126	13	0.103	119	16	0.134	94	13	0.138	0.125
chr7	28086148	+	NM_001122603	Fcgbp	CDS	56	8	0.143	61	10	0.164	49	9	0.184	0.163667
chr7	28086162	+	NM_001122603	Fcgbp	CDS	57	13	0.228	62	9	0.145	0	0	0	#
chr7	28086174	+	NM_001122603	Fcgbp	CDS	49	8	0.163	54	9	0.167	0	0	0	#
chr7	28086274	+	NM_001122603	Fcgbp	CDS	74	10	0.135	0	0	0	42	8	0.19	#
chr7	28086366	+	NM_001122603	Fcgbp	CDS	215	25	0.116	198	21	0.106	187	21	0.112	0.111333
chr7	28086645	+	NM_001122603	Fcgbp	CDS	180	24	0.133	152	16	0.105	113	12	0.107	0.115
chr7	28086672	+	NM_001122603	Fcgbp	CDS	189	32	0.169	161	25	0.155	161	21	0.13	0.151333
chr7	28086673	+	NM_001122603	Fcgbp	CDS	195	24	0.123	171	20	0.117	170	17	0.1	0.113333
chr7	28086689	+	NM_001122603	Fcgbp	CDS	256	39	0.152	238	31	0.13	233	33	0.142	0.141333
chr7	28089766	+	NM_001122603	Fcgbp	CDS	193	20	0.105	186	19	0.103	170	23	0.135	0.114333
chr7	28089768	+	NM_001122603	Fcgbp	CDS	200	36	0.18	183	27	0.148	172	35	0.206	0.178
chr7	28089802	+	NM_001122603	Fcgbp	CDS	82	10	0.122	89	17	0.191	0	0	0	#
chr7	28089903	+	NM_001122603	Fcgbp	CDS	152	16	0.105	148	16	0.108	129	16	0.124	0.112333
chr7	28089988	+	NM_001122603	Fcgbp	CDS	146	15	0.103	130	13	0.1	128	14	0.109	0.104
chr7	28090022	+	NM_001122603	Fcgbp	CDS	53	8	0.151	62	10	0.161	52	9	0.173	0.161667
chr7	28091621	+	NM_001122603	Fcgbp	CDS	137	20	0.146	125	15	0.12	111	14	0.126	0.130667
chr7	28091684	+	NM_001122603	Fcgbp	CDS	60	9	0.15	0	0	0	47	9	0.191	#
chr7	28091728	+	NM_001122603	Fcgbp	CDS	58	9	0.155	0	0	0	0	0	0	#
chr7	28091804	+	NM_001122603	Fcgbp	CDS	59	10	0.169	59	11	0.186	0	0	0	#
chr7	28091820	+	NM_001122603	Fcgbp	CDS	51	8	0.157	49	10	0.204	0	0	0	#
chr7	28091947	+	NM_001122603	Fcgbp	CDS	118	16	0.136	92	13	0.141	0	0	0	#
chr7	28092031	+	NM_001122603	Fcgbp	CDS	47	9	0.191	0	0	0	0	0	0	#
chr7	28093385	+	NM_001122603	Fcgbp	CDS	130	13	0.1	113	13	0.115	96	11	0.115	0.11
chr7	28093432	+	NM_001122603	Fcgbp	CDS	106	11	0.104	0	0	0	67	11	0.164	#
chr7	28093489	+	NM_001122603	Fcgbp	CDS	180	36	0.2	154	31	0.201	151	30	0.2	0.200333
chr7	28093512	+	NM_001122603	Fcgbp	CDS	156	18	0.115	133	19	0.143	116	19	0.164	0.140667
chr7	28093513	+	NM_001122603	Fcgbp	CDS	153	20	0.131	133	18	0.135	116	14	0.121	0.129
chr7	28093577	+	NM_001122603	Fcgbp	CDS	132	18	0.137	128	18	0.141	107	15	0.14	0.139333
chr7	28093599	+	NM_001122603	Fcgbp	CDS	109	11	0.101	102	12	0.118	87	15	0.172	0.130333
chr7	28093845	+	NM_001122603	Fcgbp	CDS	49	14	0.286	41	9	0.22	36	11	0.306	0.270667
chr7	28093856	+	NM_001122603	Fcgbp	CDS	56	8	0.143	0	0	0	42	9	0.22	#
chr7	28094109	+	NM_001122603	Fcgbp	CDS	147	18	0.123	102	12	0.119	113	12	0.107	0.116333
chr7	28094148	+	NM_001122603	Fcgbp	CDS	60	10	0.167	38	9	0.237	42	10	0.238	0.214
chr7	28094172	+	NM_001122603	Fcgbp	CDS	33	9	0.273	27	8	0.296	0	0	0	#
chr7	28102828	+	NM_001122603	Fcgbp	CDS	162	23	0.142	135	19	0.141	129	16	0.124	0.135667
chr7	28102981	+	NM_001122603	Fcgbp	CDS	16	5	0.312	0	0	0	0	0	0	#
chr7	28103016	+	NM_001122603	Fcgbp	CDS	58	10	0.172	0	0	0	0	0	0	#
chr7	28103100	+	NM_001122603	Fcgbp	CDS	64	9	0.141	49	8	0.163	55	11	0.2	0.168
chr7	28103876	+	NM_001122603	Fcgbp	CDS	143	20	0.14	116	14	0.121	118	16	0.136	0.132333
chr7	28103901	+	NM_001122603	Fcgbp	CDS	75	9	0.12	0	0	0	0	0	0	#
chr7	28104698	+	NM_001122603	Fcgbp	CDS	41	7	0.171	0	0	0	0	0	0	#
chr7	28104807	+	NM_001122603	Fcgbp	CDS	61	9	0.148	70	10	0.143	54	8	0.148	0.146333
chr7	28104941	+	NM_001122603	Fcgbp	CDS	40	7	0.175	0	0	0	0	0	0	#
chr7	28104969	+	NM_001122603	Fcgbp	CDS	59	10	0.169	0	0	0	0	0	0	#
chr7	28105020	+	NM_001122603	Fcgbp	CDS	85	11	0.131	85	10	0.118	0	0	0	#
chr7	28106261	+	NM_001122603	Fcgbp	CDS	75	12	0.16	84	12	0.143	0	0	0	#
chr7	28106293	+	NM_001122603	Fcgbp	CDS	293	33	0.113	279	34	0.122	226	24	0.106	0.113667
chr7	28106301	+	NM_001122603	Fcgbp	CDS	296	32	0.108	276	32	0.116	228	25	0.11	0.111333
chr7	28106308	+	NM_001122603	Fcgbp	CDS	282	31	0.11	0	0	0	0	0	0	#
chr7	28106486	+	NM_001122603	Fcgbp	CDS	33	7	0.212	0	0	0	32	8	0.25	#
chr7	28106556	+	NM_001122603	Fcgbp	CDS	86	15	0.176	0	0	0	0	0	0	#
chr7	28106569	+	NM_001122603	Fcgbp	CDS	144	19	0.132	147	16	0.11	124	15	0.121	0.121
chr7	28106592	+	NM_001122603	Fcgbp	CDS	142	22	0.155	151	24	0.159	130	20	0.154	0.156
chr7	28106596	+	NM_001122603	Fcgbp	CDS	136	17	0.125	147	19	0.129	127	17	0.134	0.129333
chr7	28106925	+	NM_001122603	Fcgbp	CDS	140	15	0.107	146	19	0.13	119	20	0.169	0.135333
chr7	28107097	+	NM_001122603	Fcgbp	CDS	95	11	0.116	75	12	0.164	65	10	0.154	0.144667
chr7	28107157	+	NM_001122603	Fcgbp	CDS	82	12	0.146	0	0	0	64	10	0.156	#
chr7	28107172	+	NM_001122603	Fcgbp	CDS	77	12	0.156	63	9	0.143	65	9	0.138	0.145667
chr7	28107211	+	NM_001122603	Fcgbp	CDS	32	8	0.25	0	0	0	0	0	0	#
chr7	28107250	+	NM_001122603	Fcgbp	CDS	91	17	0.189	62	9	0.145	71	11	0.155	0.163
chr7	28113991	+	NM_001122603	Fcgbp	CDS	138	18	0.13	124	16	0.129	103	14	0.136	0.131667
chr7	28114088	+	NM_001122603	Fcgbp	CDS	90	10	0.111	83	11	0.133	0	0	0	#
chr7	28120473	+	NM_001122603	Fcgbp	CDS	301	49	0.163	281	40	0.143	235	30	0.128	0.144667
chr7	28120554	+	NM_001122603	Fcgbp	stopC	181	22	0.122	166	19	0.114	170	29	0.171	0.135667
chr7	28810979	+	NM_177301	Hnrnpl	startC	13	2	0.154	12	3	0.25	14	2	0.143	0.182333
chr7	28811105	+	NM_177301	Hnrnpl	startC	31	4	0.129	17	3	0.176	20	2	0.1	0.135
chr7	28835947	+	NM_010706	Lgals4	CDS	158	27	0.171	138	26	0.188	137	26	0.19	0.183
chr7	28840885	+	NM_010706	Lgals4	CDS	78	16	0.205	77	14	0.184	71	13	0.183	0.190667
chr7	28841274	+	NM_010706	Lgals4	CDS	59	8	0.136	0	0	0	0	0	0	#
chr7	28841487	+	NM_010706	Lgals4	stopC	37	6	0.162	0	0	0	27	5	0.185	#
chr7	28841498	+	NM_010706	Lgals4	stopC	30	6	0.2	0	0	0	0	0	0	#
chr7	28893970	-	NM_021895	Actn4	3UTR	14	4	0.286	0	0	0	0	0	0	#
chr7	28893983	-	NM_021895	Actn4	3UTR	20	5	0.25	0	0	0	0	0	0	#
chr7	28894005	-	NM_021895	Actn4	3UTR	29	5	0.172	22	4	0.182	0	0	0	#
chr7	28894171	-	NM_021895	Actn4	stopC	27	5	0.185	0	0	0	0	0	0	#
chr7	28904631	-	NM_021895	Actn4	CDS	55	10	0.182	0	0	0	46	8	0.178	#
chr7	28904644	-	NM_021895	Actn4	CDS	47	10	0.213	45	14	0.311	45	9	0.2	0.241333
chr7	28905440	-	NM_021895	Actn4	CDS	17	7	0.412	0	0	0	0	0	0	#
chr7	28962057	-	NM_021895	Actn4	startC	16	3	0.188	20	3	0.15	20	4	0.2	0.179333
chr7	28962063	-	NM_021895	Actn4	startC	17	4	0.235	22	6	0.273	20	2	0.1	0.202667
chr7	28962070	-	NM_021895	Actn4	startC	18	2	0.111	23	3	0.13	17	2	0.118	0.119667
chr7	28962141	-	NM_021895	Actn4	startC	31	5	0.161	25	4	0.16	29	6	0.207	0.176
chr7	29258584	-	NM_011464	Spint2	CDS	29	8	0.276	0	0	0	25	6	0.24	#
chr7	29281632	-	NM_011464	Spint2	startC	28	6	0.222	26	3	0.115	22	7	0.333	0.223333
chr7	29281639	-	NM_011464	Spint2	startC	32	6	0.188	31	4	0.129	27	4	0.148	0.155
chr7	29281674	-	NM_011464	Spint2	startC	26	3	0.115	19	3	0.158	15	2	0.133	0.135333
chr7	29281710	-	NM_011464	Spint2	startC	91	10	0.11	78	9	0.115	68	8	0.118	0.114333
chr7	29281782	-	NM_011464	Spint2	startC	13	2	0.154	13	2	0.154	10	3	0.3	0.202667
chr7	30193980	-	NM_009795	Capns1	startC	13	6	0.462	11	3	0.273	10	6	0.6	0.445
chr7	30193988	-	NM_009795	Capns1	startC	14	2	0.143	12	3	0.25	12	3	0.25	0.214333
chr7	30194003	-	NM_009795	Capns1	startC	14	2	0.143	13	5	0.385	11	3	0.3	0.276
chr7	30195020	-	NM_009795	Capns1	5UTR	15	2	0.133	17	3	0.176	13	2	0.154	0.154333
chr7	30195022	-	NM_009795	Capns1	5UTR	13	2	0.154	14	2	0.143	12	2	0.167	0.154667
chr7	30322267	-	NM_001033140	Sdhaf1	startC	11	2	0.182	11	2	0.182	14	2	0.143	0.169
chr7	30617025	-	NM_025628	Cox6b1	stopC	31	5	0.161	0	0	0	0	0	0	#
chr7	34202369	-	NM_008155	Gpi1	stopC	13	4	0.308	0	0	0	0	0	0	#
chr7	34204102	-	NM_008155	Gpi1	CDS	40	10	0.25	0	0	0	40	7	0.175	#
chr7	34230129	-	NM_008155	Gpi1	startC	13	2	0.154	19	3	0.158	19	2	0.105	0.139
chr7	35050638	-	NM_009884	Cebpg	startC	10	2	0.2	14	2	0.143	12	3	0.25	0.197667
chr7	44248125	+	uc009gov.2	2410002F23Rik	5UTR	16	2	0.125	18	3	0.167	16	2	0.125	0.139
chr7	44248142	+	uc009gov.2	2410002F23Rik	5UTR	49	5	0.102	55	6	0.109	45	7	0.156	0.122333
chr7	44248145	+	uc009gov.2	2410002F23Rik	5UTR	51	6	0.118	53	6	0.113	50	5	0.102	0.111
chr7	44248160	+	uc009gov.2	2410002F23Rik	5UTR	51	10	0.196	55	10	0.182	44	5	0.114	0.164
chr7	44248162	+	uc009gov.2	2410002F23Rik	5UTR	50	5	0.1	54	10	0.185	44	6	0.136	0.140333
chr7	44248163	+	uc009gov.2	2410002F23Rik	5UTR	51	6	0.118	53	8	0.151	48	7	0.146	0.138333
chr7	44248171	+	uc009gov.2	2410002F23Rik	5UTR	46	11	0.239	48	13	0.271	41	5	0.122	0.210667
chr7	44248178	+	uc009gov.2	2410002F23Rik	5UTR	20	5	0.25	19	5	0.263	13	4	0.308	0.273667
chr7	44250138	+	uc009goy.1	Snord88a	5UTR	25	6	0.24	21	5	0.238	19	7	0.368	0.282
chr7	44250139	+	uc009goy.1	Snord88a	5UTR	25	8	0.32	22	6	0.273	20	8	0.4	0.331
chr7	44250140	+	uc009goy.1	Snord88a	5UTR	25	7	0.28	21	6	0.286	20	6	0.3	0.288667
chr7	44250141	+	uc009goy.1	Snord88a	5UTR	25	7	0.28	24	7	0.292	19	9	0.474	0.348667
chr7	44250142	+	uc009goy.1	Snord88a	5UTR	23	7	0.304	25	6	0.24	22	7	0.318	0.287333
chr7	44250150	+	uc009goy.1	Snord88a	5UTR	26	9	0.346	25	7	0.28	20	8	0.4	0.342
chr7	44250151	+	uc009goy.1	Snord88a	5UTR	25	7	0.28	24	7	0.292	21	7	0.333	0.301667
chr7	44250154	+	uc009goy.1	Snord88a	5UTR	25	5	0.2	26	6	0.231	21	7	0.333	0.254667
chr7	44250156	+	uc009goy.1	Snord88a	5UTR	26	11	0.423	25	11	0.44	21	9	0.429	0.430667
chr7	44250161	+	uc009goy.1	Snord88a	5UTR	26	7	0.269	26	7	0.269	21	11	0.524	0.354
chr7	44250163	+	uc009goy.1	Snord88a	5UTR	26	7	0.269	25	8	0.32	21	8	0.381	0.323333
chr7	44250167	+	uc009goy.1	Snord88a	5UTR	25	6	0.24	27	8	0.296	22	7	0.318	0.284667
chr7	44250168	+	uc009goy.1	Snord88a	5UTR	26	6	0.231	26	6	0.231	22	6	0.273	0.245
chr7	44250171	+	uc009goy.1	Snord88a	5UTR	26	6	0.231	27	6	0.222	22	7	0.318	0.257
chr7	44250172	+	uc009goy.1	Snord88a	5UTR	27	5	0.185	26	7	0.269	22	9	0.409	0.287667
chr7	44250179	+	uc009goy.1	Snord88a	5UTR	24	5	0.208	21	5	0.238	19	7	0.368	0.271333
chr7	44250186	+	uc009goy.1	Snord88a	5UTR	18	3	0.167	15	5	0.333	16	8	0.5	0.333333
chr7	44250187	+	uc009goy.1	Snord88a	5UTR	16	5	0.312	14	6	0.429	17	6	0.353	0.364667
chr7	44250188	+	uc009goy.1	Snord88a	5UTR	14	4	0.286	11	4	0.364	15	7	0.467	0.372333
chr7	44250189	+	uc009goy.1	Snord88a	5UTR	15	4	0.267	10	5	0.5	15	7	0.467	0.411333
chr7	44250190	+	uc009goy.1	Snord88a	5UTR	16	3	0.188	11	5	0.455	15	6	0.4	0.347667
chr7	44250453	+	uc009goy.1	Snord88a	5UTR	41	13	0.317	36	13	0.361	34	11	0.324	0.334
chr7	44250454	+	uc009goy.1	Snord88a	5UTR	45	18	0.4	45	15	0.333	38	14	0.368	0.367
chr7	44250455	+	uc009goy.1	Snord88a	5UTR	48	17	0.354	43	14	0.326	37	13	0.351	0.343667
chr7	44250456	+	uc009goy.1	Snord88a	5UTR	47	18	0.383	45	16	0.356	46	20	0.435	0.391333
chr7	44250457	+	uc009goy.1	Snord88a	5UTR	50	19	0.38	44	15	0.341	44	18	0.409	0.376667
chr7	44250471	+	uc009goy.1	Snord88a	5UTR	61	20	0.328	57	15	0.268	52	20	0.385	0.327
chr7	44250473	+	uc009goy.1	Snord88a	startC	59	23	0.39	58	24	0.414	51	23	0.451	0.418333
chr7	44250478	+	uc009goy.1	Snord88a	startC	69	23	0.333	65	27	0.415	57	23	0.411	0.386333
chr7	44250480	+	uc009goy.1	Snord88a	startC	70	21	0.3	71	18	0.254	57	24	0.421	0.325
chr7	44250484	+	uc009goy.1	Snord88a	startC	77	26	0.338	80	19	0.237	66	21	0.318	0.297667
chr7	44250485	+	uc009goy.1	Snord88a	startC	81	19	0.237	80	16	0.2	67	20	0.299	0.245333
chr7	44250487	+	uc009goy.1	Snord88a	startC	93	17	0.183	85	15	0.176	67	18	0.269	0.209333
chr7	44250488	+	uc009goy.1	Snord88a	startC	92	17	0.185	88	15	0.17	74	19	0.257	0.204
chr7	44250505	+	uc009goy.1	Snord88a	startC	129	27	0.209	121	18	0.15	104	17	0.163	0.174
chr7	44250506	+	uc009goy.1	Snord88a	startC	137	21	0.154	121	23	0.19	104	20	0.192	0.178667
chr7	44250508	+	uc009goy.1	Snord88a	startC	135	21	0.156	128	19	0.148	111	18	0.162	0.155333
chr7	44250509	+	uc009goy.1	Snord88a	startC	138	21	0.152	128	18	0.141	115	16	0.139	0.144
chr7	44250514	+	uc009goy.1	Snord88a	startC	140	14	0.1	127	15	0.119	110	16	0.145	0.121333
chr7	44250515	+	uc009goy.1	Snord88a	startC	139	17	0.123	125	21	0.168	107	20	0.189	0.16
chr7	44250521	+	uc009goy.1	Snord88a	startC	125	18	0.145	119	18	0.153	107	12	0.112	0.136667
chr7	44250524	+	uc009goy.1	Snord88a	startC	125	19	0.152	118	15	0.127	99	12	0.121	0.133333
chr7	44613497	-	NM_028021	Myh14	CDS	20	5	0.263	0	0	0	0	0	0	#
chr7	44614350	-	NM_028021	Myh14	CDS	33	7	0.212	27	6	0.222	0	0	0	#
chr7	44615434	-	NM_028021	Myh14	CDS	36	7	0.194	0	0	0	26	6	0.231	#
chr7	44623074	-	NM_028021	Myh14	CDS	34	8	0.235	25	6	0.24	28	6	0.214	0.229667
chr7	44625089	-	NM_028021	Myh14	CDS	57	8	0.14	0	0	0	54	9	0.167	#
chr7	44628569	-	NM_028021	Myh14	CDS	66	10	0.152	53	8	0.151	0	0	0	#
chr7	44628595	-	NM_028021	Myh14	CDS	52	9	0.173	58	9	0.155	0	0	0	#
chr7	44628860	-	NM_028021	Myh14	CDS	32	7	0.219	0	0	0	0	0	0	#
chr7	44629298	-	NM_028021	Myh14	CDS	43	8	0.186	0	0	0	0	0	0	#
chr7	44629902	-	NM_028021	Myh14	CDS	37	7	0.189	0	0	0	0	0	0	#
chr7	44630012	-	NM_028021	Myh14	CDS	24	6	0.25	0	0	0	0	0	0	#
chr7	44630767	-	NM_028021	Myh14	CDS	19	5	0.263	0	0	0	19	5	0.278	#
chr7	44630793	-	NM_028021	Myh14	CDS	25	7	0.28	0	0	0	0	0	0	#
chr7	44630799	-	NM_028021	Myh14	CDS	29	6	0.207	0	0	0	0	0	0	#
chr7	45103709	-	NM_010189	Fcgrt	5UTR	10	1	0.1	12	3	0.25	12	3	0.25	0.2
chr7	45103716	-	NM_010189	Fcgrt	5UTR	11	3	0.273	13	2	0.154	11	3	0.273	0.233333
chr7	45126605	-	uc009gtj.2	Rpl13a	CDS	28	6	0.214	30	9	0.3	25	6	0.24	0.251333
chr7	45126611	-	uc009gtj.2	Rpl13a	CDS	44	15	0.341	55	22	0.4	43	21	0.488	0.409667
chr7	45126615	-	uc009gtj.2	Rpl13a	CDS	47	11	0.234	59	19	0.322	45	18	0.4	0.318667
chr7	45126617	-	uc009gtj.2	Rpl13a	CDS	45	11	0.244	60	22	0.367	48	16	0.333	0.314667
chr7	45126618	-	uc009gtj.2	Rpl13a	CDS	48	13	0.271	61	20	0.328	47	19	0.404	0.334333
chr7	45126619	-	uc009gtj.2	Rpl13a	CDS	50	11	0.22	62	21	0.339	49	16	0.327	0.295333
chr7	45126620	-	uc009gtj.2	Rpl13a	CDS	54	14	0.259	63	19	0.302	49	15	0.306	0.289
chr7	45126628	-	uc009gtj.2	Rpl13a	CDS	59	13	0.22	69	16	0.232	59	16	0.271	0.241
chr7	45126630	-	uc009gtj.2	Rpl13a	CDS	62	17	0.274	71	22	0.31	60	18	0.3	0.294667
chr7	45126631	-	uc009gtj.2	Rpl13a	CDS	61	23	0.377	72	36	0.5	61	31	0.508	0.461667
chr7	45126642	-	uc009gtj.2	Rpl13a	CDS	72	24	0.333	88	37	0.42	71	30	0.423	0.392
chr7	45126645	-	uc009gtj.2	Rpl13a	CDS	73	27	0.37	90	40	0.444	77	36	0.468	0.427333
chr7	45126646	-	uc009gtj.2	Rpl13a	CDS	73	29	0.397	91	44	0.484	77	34	0.442	0.441
chr7	45126652	-	uc009gtj.2	Rpl13a	CDS	76	30	0.395	92	47	0.511	78	38	0.487	0.464333
chr7	45126655	-	uc009gtj.2	Rpl13a	CDS	73	32	0.438	92	45	0.489	77	36	0.468	0.465
chr7	45126665	-	uc009gtj.2	Rpl13a	CDS	58	28	0.483	75	44	0.587	67	36	0.537	0.535667
chr7	45126668	-	uc009gtj.2	Rpl13a	CDS	52	28	0.538	60	36	0.6	52	27	0.519	0.552333
chr7	45127385	-	uc009gtj.2	Rpl13a	5UTR	60	25	0.417	60	25	0.417	62	24	0.387	0.407
chr7	45127391	-	uc009gtj.2	Rpl13a	5UTR	98	46	0.474	90	44	0.489	89	38	0.427	0.463333
chr7	45127393	-	uc009gtj.2	Rpl13a	5UTR	102	50	0.49	105	49	0.467	89	43	0.483	0.48
chr7	45127395	-	uc009gtj.2	Rpl13a	5UTR	100	44	0.44	109	48	0.44	92	38	0.413	0.431
chr7	45127396	-	uc009gtj.2	Rpl13a	5UTR	100	49	0.49	110	53	0.482	94	42	0.447	0.473
chr7	45127398	-	uc009gtj.2	Rpl13a	5UTR	102	41	0.402	111	49	0.441	97	37	0.381	0.408
chr7	45127402	-	uc009gtj.2	Rpl13a	5UTR	106	43	0.406	108	45	0.417	103	39	0.379	0.400667
chr7	45127403	-	uc009gtj.2	Rpl13a	5UTR	106	42	0.396	115	49	0.426	106	36	0.34	0.387333
chr7	45127404	-	uc009gtj.2	Rpl13a	5UTR	109	46	0.422	112	48	0.429	103	40	0.388	0.413
chr7	45127407	-	uc009gtj.2	Rpl13a	5UTR	115	47	0.409	118	51	0.432	108	43	0.398	0.413
chr7	45127416	-	uc009gtj.2	Rpl13a	5UTR	112	47	0.42	114	55	0.482	107	43	0.402	0.434667
chr7	45127419	-	uc009gtj.2	Rpl13a	5UTR	111	45	0.405	115	48	0.417	105	43	0.41	0.410667
chr7	45127421	-	uc009gtj.2	Rpl13a	5UTR	105	40	0.381	107	43	0.402	96	30	0.316	0.366333
chr7	45127423	-	uc009gtj.2	Rpl13a	5UTR	108	41	0.38	108	42	0.389	98	30	0.306	0.358333
chr7	45127432	-	uc009gtj.2	Rpl13a	5UTR	106	44	0.415	108	47	0.435	94	30	0.319	0.389667
chr7	45127436	-	uc009gtj.2	Rpl13a	5UTR	97	38	0.396	95	42	0.442	88	27	0.307	0.381667
chr7	45127439	-	uc009gtj.2	Rpl13a	5UTR	76	36	0.474	76	40	0.526	71	29	0.408	0.469333
chr7	45127440	-	uc009gtj.2	Rpl13a	5UTR	70	33	0.471	74	34	0.459	67	25	0.373	0.434333
chr7	45127442	-	uc009gtj.2	Rpl13a	5UTR	57	33	0.579	61	37	0.607	52	24	0.462	0.549333
chr7	45127444	-	uc009gtj.2	Rpl13a	5UTR	51	33	0.647	53	34	0.642	46	25	0.543	0.610667
chr7	45127446	-	uc009gtj.2	Rpl13a	5UTR	47	30	0.638	52	34	0.654	41	21	0.525	0.605667
chr7	45127449	-	uc009gtj.2	Rpl13a	5UTR	47	30	0.638	46	30	0.652	42	24	0.571	0.620333
chr7	45127458	-	uc009gtj.2	Rpl13a	5UTR	40	29	0.725	42	29	0.69	35	21	0.6	0.671667
chr7	45127459	-	uc009gtj.2	Rpl13a	5UTR	39	30	0.769	43	32	0.744	37	22	0.595	0.702667
chr7	45392286	-	NM_009224	Snrnp70	CDS	30	7	0.233	0	0	0	0	0	0	#
chr7	45395531	-	NM_009224	Snrnp70	5UTR	21	5	0.238	22	3	0.136	18	2	0.111	0.161667
chr7	45395538	-	NM_009224	Snrnp70	5UTR	27	4	0.148	30	6	0.2	22	6	0.273	0.207
chr7	45395602	-	NM_009224	Snrnp70	5UTR	13	3	0.231	0	0	0	0	0	0	#
chr7	45510350	-	NM_008749	Nucb1	5UTR	11	4	0.364	0	0	0	0	0	0	#
chr7	45872971	+	NM_133950	Kdelr1	startC	17	3	0.176	10	2	0.2	12	4	0.333	0.236333
chr7	46220484	-	NM_023649	Ush1c	CDS	61	13	0.213	56	9	0.161	49	12	0.245	0.206333
chr7	46850227	+	NM_010699	Ldha	CDS	47	8	0.17	38	7	0.184	34	8	0.235	0.196333
chr7	46850983	+	NM_010699	Ldha	CDS	81	10	0.123	75	9	0.12	0	0	0	#
chr7	46855389	+	NM_010699	Ldha	3UTR	30	6	0.2	0	0	0	0	0	0	#
chr7	79297043	+	NM_018811	Abhd2	startC	12	3	0.25	16	4	0.25	11	2	0.182	0.227333
chr7	79297072	+	NM_018811	Abhd2	startC	17	2	0.118	0	0	0	0	0	0	#
chr7	79297124	+	NM_018811	Abhd2	startC	15	2	0.133	0	0	0	0	0	0	#
chr7	79361677	+	ENSMUST00000037315	Abhd2	3UTR	18	4	0.222	10	5	0.5	10	3	0.3	0.340667
chr7	79821938	-	NM_008486	Anpep	3UTR	80	8	0.1	59	6	0.102	55	6	0.109	0.103667
chr7	79821949	-	NM_008486	Anpep	3UTR	105	16	0.152	0	0	0	0	0	0	#
chr7	79825322	-	NM_008486	Anpep	CDS	55	12	0.218	0	0	0	51	10	0.2	#
chr7	79825741	-	NM_008486	Anpep	CDS	58	9	0.155	0	0	0	0	0	0	#
chr7	79826638	-	NM_008486	Anpep	CDS	188	19	0.101	170	17	0.1	157	16	0.102	0.101
chr7	79826651	-	NM_008486	Anpep	CDS	128	16	0.125	100	12	0.12	103	14	0.136	0.127
chr7	79826690	-	NM_008486	Anpep	CDS	150	16	0.107	0	0	0	118	12	0.102	#
chr7	79826906	-	NM_008486	Anpep	CDS	155	16	0.104	157	17	0.109	142	18	0.127	0.113333
chr7	79826920	-	NM_008486	Anpep	CDS	241	34	0.141	232	32	0.138	211	27	0.128	0.135667
chr7	79836020	-	NM_008486	Anpep	CDS	109	12	0.11	87	10	0.115	0	0	0	#
chr7	79836340	-	NM_008486	Anpep	CDS	113	12	0.106	0	0	0	0	0	0	#
chr7	79838673	-	NM_008486	Anpep	CDS	48	9	0.188	0	0	0	0	0	0	#
chr7	79838912	-	NM_008486	Anpep	CDS	89	12	0.136	82	10	0.122	0	0	0	#
chr7	79838916	-	NM_008486	Anpep	CDS	88	12	0.138	0	0	0	59	10	0.169	#
chr7	79838956	-	NM_008486	Anpep	CDS	129	13	0.101	109	13	0.12	102	21	0.206	0.142333
chr7	79838976	-	NM_008486	Anpep	CDS	101	12	0.119	87	14	0.161	88	14	0.161	0.147
chr7	79839255	-	NM_008486	Anpep	CDS	104	12	0.115	0	0	0	0	0	0	#
chr7	79839509	-	NM_008486	Anpep	CDS	24	6	0.25	0	0	0	16	5	0.312	#
chr7	79841670	-	NM_008486	Anpep	CDS	140	16	0.114	155	16	0.103	122	16	0.131	0.116
chr7	79841955	-	NM_008486	Anpep	CDS	16	6	0.375	0	0	0	19	6	0.316	#
chr7	79841987	-	NM_008486	Anpep	CDS	58	10	0.172	0	0	0	36	8	0.222	#
chr7	79842044	-	NM_008486	Anpep	CDS	33	7	0.219	0	0	0	0	0	0	#
chr7	79842091	-	NM_008486	Anpep	startC	51	6	0.118	35	5	0.143	50	6	0.12	0.127
chr7	79842174	-	NM_008486	Anpep	startC	49	6	0.122	43	7	0.163	41	5	0.122	0.135667
chr7	79842203	-	NM_008486	Anpep	startC	46	6	0.13	45	5	0.111	40	8	0.2	0.147
chr7	80402646	-	NM_011046	Furin	5UTR	14	3	0.214	13	5	0.385	12	2	0.167	0.255333
chr7	83755969	+	ENSMUST00000042280	Gm7964	startC	20	5	0.25	16	4	0.25	13	3	0.231	0.243667
chr7	84151663	-	NM_133722	Abhd17c	startC	27	3	0.111	15	4	0.267	16	2	0.125	0.167667
chr7	84151847	-	NM_133722	Abhd17c	startC	21	3	0.143	19	3	0.158	14	2	0.143	0.148
chr7	90130432	+	NM_146194	Picalm	startC	19	3	0.158	14	3	0.214	14	2	0.143	0.171667
chr7	90130449	+	NM_146194	Picalm	startC	15	3	0.2	10	2	0.2	11	3	0.273	0.224333
chr7	90130561	+	NM_146194	Picalm	startC	16	3	0.188	16	5	0.312	14	3	0.214	0.238
chr7	90130566	+	NM_146194	Picalm	startC	15	2	0.133	18	4	0.222	17	4	0.235	0.196667
chr7	90130588	+	NM_146194	Picalm	startC	20	4	0.2	20	3	0.15	20	2	0.1	0.15
chr7	90207931	+	NM_146194	Picalm	3UTR	18	5	0.278	23	4	0.174	0	0	0	#
chr7	97081878	+	NM_010248	Gab2	startC	10	1	0.1	10	1	0.1	14	2	0.143	0.114333
chr7	99222371	-	NM_177448	Mogat2	CDS	22	6	0.273	0	0	0	18	5	0.278	#
chr7	99479401	-	NM_012052	Rps3	stopC	25	5	0.2	0	0	0	0	0	0	#
chr7	99479571	-	uc009ils.1	Rps3	3UTR	66	23	0.348	69	21	0.304	53	11	0.208	0.286667
chr7	99479578	-	uc009ils.1	Rps3	3UTR	68	15	0.221	70	16	0.232	53	12	0.226	0.226333
chr7	99479594	-	uc009ils.1	Rps3	3UTR	99	13	0.131	106	22	0.208	84	19	0.226	0.188333
chr7	99479596	-	uc009ils.1	Rps3	3UTR	99	15	0.153	101	14	0.141	80	18	0.225	0.173
chr7	99479601	-	uc009ils.1	Rps3	3UTR	95	17	0.179	94	17	0.181	79	13	0.165	0.175
chr7	99479602	-	uc009ils.1	Rps3	3UTR	94	12	0.129	95	18	0.189	79	15	0.19	0.169333
chr7	99479616	-	uc009ils.1	Rps3	3UTR	83	15	0.181	92	18	0.196	76	11	0.145	0.174
chr7	99479617	-	uc009ils.1	Rps3	3UTR	83	16	0.193	94	20	0.213	76	15	0.197	0.201
chr7	99479618	-	uc009ils.1	Rps3	3UTR	83	12	0.145	92	16	0.174	76	15	0.197	0.172
chr7	99479625	-	uc009ils.1	Rps3	3UTR	67	9	0.134	78	13	0.169	64	10	0.156	0.153
chr7	99479630	-	uc009ils.1	Rps3	3UTR	70	15	0.214	79	25	0.316	65	16	0.254	0.261333
chr7	99479638	-	uc009ils.1	Rps3	3UTR	67	21	0.313	75	19	0.253	67	16	0.239	0.268333
chr7	99479644	-	uc009ils.1	Rps3	3UTR	60	12	0.2	68	12	0.176	67	13	0.194	0.19
chr7	99479645	-	uc009ils.1	Rps3	3UTR	61	14	0.23	67	18	0.269	67	16	0.239	0.246
chr7	99479650	-	uc009ils.1	Rps3	3UTR	66	16	0.242	72	13	0.183	72	12	0.167	0.197333
chr7	99479654	-	uc009ils.1	Rps3	3UTR	67	14	0.209	74	17	0.23	75	16	0.213	0.217333
chr7	99479655	-	uc009ils.1	Rps3	3UTR	67	15	0.224	75	11	0.147	75	15	0.2	0.190333
chr7	99479656	-	uc009ils.1	Rps3	3UTR	69	13	0.188	77	18	0.234	76	20	0.263	0.228333
chr7	99479662	-	uc009ils.1	Rps3	3UTR	74	19	0.257	83	18	0.217	75	18	0.24	0.238
chr7	99479664	-	uc009ils.1	Rps3	3UTR	75	19	0.253	82	19	0.235	81	14	0.173	0.220333
chr7	99479668	-	uc009ils.1	Rps3	3UTR	86	16	0.186	93	17	0.187	89	18	0.202	0.191667
chr7	99479671	-	uc009ils.1	Rps3	3UTR	91	20	0.22	98	18	0.184	91	17	0.187	0.197
chr7	99479673	-	uc009ils.1	Rps3	3UTR	92	15	0.163	99	20	0.202	96	16	0.17	0.178333
chr7	99479674	-	uc009ils.1	Rps3	3UTR	94	19	0.202	101	18	0.178	94	18	0.196	0.192
chr7	99479682	-	uc009ils.1	Rps3	3UTR	115	16	0.139	114	15	0.132	109	14	0.128	0.133
chr7	99479687	-	uc009ils.1	Rps3	3UTR	131	26	0.198	141	22	0.157	125	26	0.208	0.187667
chr7	99479693	-	uc009ils.1	Rps3	3UTR	128	31	0.242	136	37	0.272	122	24	0.197	0.237
chr7	99479695	-	uc009ils.1	Rps3	3UTR	128	22	0.172	138	25	0.181	123	19	0.154	0.169
chr7	99479704	-	uc009ils.1	Rps3	3UTR	120	18	0.15	130	22	0.169	117	16	0.137	0.152
chr7	99483605	-	NM_012052	Rps3	startC	42	6	0.143	41	5	0.122	49	7	0.143	0.136
chr7	99483628	-	NM_012052	Rps3	startC	50	7	0.14	43	7	0.163	51	10	0.196	0.166333
chr7	100493375	+	NM_011671	Ucp2	5UTR	14	4	0.286	12	3	0.25	12	3	0.25	0.262
chr7	100493381	+	NM_011671	Ucp2	5UTR	14	3	0.214	12	3	0.25	12	2	0.167	0.210333
chr7	100493384	+	NM_011671	Ucp2	5UTR	15	4	0.267	14	3	0.214	14	3	0.214	0.231667
chr7	100493389	+	NM_011671	Ucp2	5UTR	14	3	0.214	14	3	0.214	15	4	0.267	0.231667
chr7	100493391	+	NM_011671	Ucp2	5UTR	15	4	0.267	14	4	0.286	14	3	0.214	0.255667
chr7	100493392	+	NM_011671	Ucp2	5UTR	16	4	0.25	12	3	0.25	14	2	0.143	0.214333
chr7	100493395	+	NM_011671	Ucp2	5UTR	16	4	0.25	13	3	0.231	15	4	0.267	0.249333
chr7	100493398	+	NM_011671	Ucp2	5UTR	16	7	0.438	14	5	0.357	15	5	0.333	0.376
chr7	100493399	+	NM_011671	Ucp2	5UTR	16	4	0.25	14	4	0.286	14	3	0.214	0.25
chr7	100493404	+	NM_011671	Ucp2	5UTR	16	4	0.25	14	4	0.286	15	3	0.2	0.245333
chr7	100493408	+	NM_011671	Ucp2	5UTR	14	2	0.143	10	2	0.2	10	5	0.5	0.281
chr7	100493421	+	NM_011671	Ucp2	5UTR	11	3	0.273	10	1	0.1	10	2	0.2	0.191
chr7	100493422	+	NM_011671	Ucp2	5UTR	10	1	0.1	10	1	0.1	10	1	0.1	0.1
chr7	100583069	-	NM_198831	Mrpl48	startC	14	3	0.214	19	2	0.105	17	2	0.118	0.145667
chr7	101321242	+	uc009ioi.1	Stard10	5UTR	33	5	0.152	0	0	0	0	0	0	#
chr7	103813889	-	NM_008220	Hbb-bt	startC	10	10	1	12	11	0.917	10	10	1	0.972333
chr7	103813893	-	NM_008220	Hbb-bt	startC	16	15	0.938	20	20	1	15	15	1	0.979333
chr7	103813905	-	NM_008220	Hbb-bt	startC	19	19	1	23	23	1	19	19	1	1
chr7	103813911	-	NM_008220	Hbb-bt	startC	19	19	1	24	24	1	19	19	1	1
chr7	103813914	-	NM_008220	Hbb-bt	startC	19	19	1	22	22	1	18	18	1	1
chr7	103813920	-	NM_008220	Hbb-bt	startC	18	18	1	22	22	1	19	19	1	1
[truncated: 3,265 more rows]
